# Supplementary material for: Metaproteomic analysis decodes the trophic basis of microbes in the dark ocean
Source: Research Square preprint supplement (doi:10.21203/rs.3.rs-2727130/v1), 2023-04-07
Supplement: Supplementary file 2 [file Supplementary dataset2.xlsx]

## Sheet: Metagenome
Prok_metagenome	Prok_metatranscriptome		Euk_metagenome	Euk_metatranscriptome	<0.2um_metagenome
ERR594310	ERR3586677		ERR868465,ERR868424	ERR1740118,ERR1740132	ERR594352
ERR594317	ERR3586678		ERR1726609,ERR1726527	ERR1739847,ERR1739848	ERR594358
ERR594339	ERR3586679		ERR1700903	ERR1739849,ERR1739845	ERR594378
ERR598942	ERR3586680		ERR1726655	ERR1739836,ERR1739837	ERR594408
ERR598945	ERR3586681		ERR1726698,ERR1726550,ERR1726623	ERR1740140,ERR1740131	ERR594375
ERR598967	ERR3586682		ERR868453,ERR868457	ERR1712104,ERR1711958	ERR594396
ERR598971	ERR3586683		ERR1726631	ERR1711961,ERR1712068	ERR594405
ERR598976	ERR3586684		ERR868493	ERR1719161,ERR1719388	ERR594401
ERR598978	ERR3586685		ERR1726634,ERR1726656	ERR1719156,ERR1719428	ERR594360
ERR598984	ERR3586686		ERR1726865	ERR1719254,ERR1719401	ERR594393
ERR598994	ERR3586687		ERR1726755,ERR1726588,ERR1726639	ERR1711884,ERR1712214	ERR594390
ERR599009	ERR3586688		ERR1726624,ERR1726909	ERR1719403,ERR1719204	ERR594368
ERR599027	ERR3586689		ERR868422,ERR868440	ERR1719321,ERR1719146	ERR594402
ERR599029	ERR3586690		ERR1726842	ERR1719332,ERR1719420	ERR594369
ERR599044	ERR3586691		ERR1726742	ERR1711862,ERR1711982	ERR594386
ERR599050	ERR3586692		ERR1726659	ERR1712095,ERR1711983	ERR594374
ERR599090	ERR3586693		ERR1700911	ERR1711942,ERR1711875	ERR594363
ERR599144	ERR3586694		ERR868357	ERR1719172,ERR1719375	ERR594356
ERR599160	ERR3586695		ERR1726628	ERR1719443,ERR1719515	ERR594366
SRR3960684	ERR3586696		ERR1726841	ERR1719279,ERR1719396	ERR594384
SRR3961936	ERR3586697		ERR1726709	ERR1719232,ERR1719438	ERR594413
SRR3962772	ERR3586698		ERR1726705	ERR1719312,ERR1719308	ERR594398
SRR3962773	ERR3586699		ERR1726945,ERR1726964	ERR1719147,ERR1719481	ERR594376
SRR3965592	ERR3586700		ERR868472,ERR868450	ERR1719335	ERR594394
SRR3967025	ERR3586701		ERR1726760	ERR1719281,ERR1719299	ERR594385
SRR4028193	ERR3586702		ERR1726658,ERR1726563	ERR1719245	ERR594392
SRR4028224	ERR3586703		ERR868506,ERR868470	ERR1712098,ERR1712058	ERR594382
ERR598956	ERR3586704		ERR868441,ERR868374	ERR1719235	ERR594359
ERR598999	ERR3586705		ERR1726807,ERR1726933,ERR1726955	ERR1719314,ERR1719379	ERR594389
ERR599002	ERR3586706		ERR1726792,ERR1726871	ERR1719373,ERR1719168	ERR594362
ERR599026	ERR3586707		ERR1726801,ERR1726788	ERR1719208,ERR1719471	ERR594395
ERR599053	ERR3586708		ERR1726789,ERR1726766	ERR1719286,ERR1719300	ERR594415
ERR599117	ERR3586709		ERR868438,ERR868364	ERR1712124,ERR1712224	ERR594391
ERR599156	ERR3586710		ERR1726579	ERR1712201,ERR1712025	ERR594407
SRR3965873	ERR3586711		ERR1726604	ERR1719347,ERR1719358	ERR594353
SRR3968777	ERR3586712		ERR868442	ERR1712078,ERR1711886	ERR594379
SRR8159436	ERR3586713		ERR1726602,ERR1726907	ERR1712134,ERR1711937	ERR594388
ERR588857	ERR3586714		ERR1726732,ERR1726890	ERR1712115,ERR1712177	ERR594364
ERR594299	ERR3586715		ERR1726528	ERR1719170,ERR1719445	ERR594355
ERR594308	ERR3586716		ERR1726739,ERR1726775	ERR1711954,ERR1712081	ERR594354
ERR594311	ERR3586717		ERR868381	ERR1719262,ERR1719355	ERR594411
ERR594313	ERR3586718		ERR1726584	ERR1719211,ERR1719412	ERR594409
ERR594329	ERR3586719		ERR1726771	ERR1719290,ERR1719187	ERR594377
ERR594336	ERR3586720		ERR1726690	ERR1712144,ERR1711977	ERR594357
ERR594337	ERR3586721		ERR1726552,ERR1726882	ERR1712147,ERR1711885	ERR594412
ERR594343	ERR3586722		ERR873963	ERR1719191,ERR1719236
ERR594349	ERR3586723		ERR868476	ERR1711992,ERR1712241
ERR598944	ERR3586724		ERR1726567	ERR1719447,ERR1719462
ERR598946	ERR3586725		ERR1726916	ERR1711904,ERR1711985
ERR598947	ERR3586726		ERR1726670	ERR1719231,ERR1719164
ERR598950	ERR3586727		ERR1726597	ERR1712063,ERR1712137
ERR598953	ERR3586728		ERR1700895	ERR1712049,ERR1711860
ERR598954	ERR3586729		ERR1726642,ERR1726791	ERR1711946,ERR1711911
ERR598958	ERR3586730		ERR1726953,ERR1726879	ERR1712182,ERR1712118,ERR1711869
ERR598960	ERR3586731		ERR868475,ERR868513	ERR1712207,ERR1711933,ERR1711897
ERR598964	ERR3586732		ERR1726556,ERR1726667	ERR1712069,ERR1712197,ERR1711986
ERR598968	ERR3586733		ERR1726938,ERR1726688	ERR1712219,ERR1711929,ERR1711951
ERR598975	ERR3586734		ERR1726927,ERR1726932	ERR1719463,ERR1719159
ERR598980	ERR3586735		ERR1726883,ERR1726891	ERR1719393,ERR1719310
ERR598981	ERR3586736		ERR868466,ERR868469	ERR1719437,ERR1719413,ERR1719343
ERR598983	ERR3586737		ERR1726762,ERR1726913	ERR1719297,ERR1719410,ERR1719307
ERR598985	ERR3586738		ERR1726961,ERR1726522	ERR1719256,ERR1719298,ERR1719217
ERR598986	ERR3586739		ERR1726622,ERR1726721	ERR1711914,ERR1711917
ERR598987	ERR3586740		ERR1726770,ERR1726561	ERR1719301,ERR1719160,ERR1719214
ERR598988	ERR3586741		ERR868363,ERR868489	ERR1719448,ERR1719389,ERR1719194
ERR598991	ERR3586742		ERR1726564,ERR1726725,ERR1726569	ERR1711949,ERR1712155
ERR598995	ERR3586743		ERR1726571,ERR1726533	ERR1719391,ERR1719175,ERR1719381,ERR1719365
ERR598998	ERR3586744		ERR1726892,ERR1726601	ERR1711882,ERR1711999
ERR599000	ERR3586745		ERR1726608,ERR1726657,ERR1726763	ERR1719395,ERR1719316,ERR1719207
ERR599001	ERR3586746		ERR868382,ERR868352	ERR1719404,ERR1719213,ERR1719459
ERR599004	ERR3586747		ERR1726643,ERR1726714,ERR1726846	ERR1719356,ERR1719145,ERR1719293
ERR599005	ERR3586748		ERR1726822,ERR1726912,ERR1726691	ERR1712102,ERR1711923
ERR599008	ERR3586749		ERR1726695,ERR1726666,ERR1726903	ERR1719295,ERR1719249,ERR1719385
ERR599014	ERR3586750		ERR1726745,ERR1726946,ERR1726765	ERR1719380,ERR1719324
ERR599015	ERR3586751		ERR868458	ERR1719439,ERR1719333
ERR599020	ERR3586752		ERR1726858	ERR1712176,ERR1712003
ERR599021	ERR3586753		ERR1726562	ERR1711902,ERR1712152
ERR599023	ERR3586754		ERR1726727	ERR1711867,ERR1712101
ERR599030	ERR3586755		ERR1726962	ERR1719364,ERR1719311,ERR1719405
ERR599031	ERR3586756		ERR868462	ERR1719243,ERR1719327
ERR599033	ERR3586757		ERR1726851	ERR1712157,ERR1712174
ERR599034	ERR3586758		ERR1726594	ERR1712067,ERR1711952
ERR599037	ERR3586759		ERR1726577	ERR1711989,ERR1712175
ERR599038	ERR3586760		ERR1726795	ERR1719169,ERR1719456
ERR599047	ERR3586761		ERR868386,ERR868464	ERR1711881,ERR1712036
ERR599048	ERR3586762		ERR1726845,ERR1726724	ERR1712050,ERR1711979
ERR599051	ERR3586763		ERR1726595	ERR1711895,ERR1712120
ERR599052	ERR3586764		ERR1726767	ERR1712077,ERR1712020
ERR599054	ERR3586765		ERR1726966	ERR1712054,ERR1711975
ERR599055	ERR3586766		ERR868485	ERR1712178,ERR1711912
ERR599057	ERR3586767		ERR1726914	ERR1719493,ERR1719499
ERR599060	ERR3586768		ERR1726640,ERR1726924	ERR1712117,ERR1712027
ERR599061	ERR3586769		ERR1726621	ERR1719202,ERR1719419
ERR599062	ERR3586770		ERR1726823	ERR1712132,ERR1712072
ERR599064	ERR3586771		ERR868385	ERR1711883,ERR1711981
ERR599067	ERR3586772		ERR1726570	ERR1712066,ERR1711930
ERR599070	ERR3586773		ERR1726837	ERR1719292,ERR1719228
ERR599071	ERR3586774		ERR1726818	ERR1711988,ERR1711987
ERR599072	ERR3586775		ERR868480	ERR1719372,ERR1719230
ERR599074	ERR3586776		ERR1726816	ERR1712040,ERR1711972
ERR599076	ERR3586777		ERR1726849,ERR1726559	ERR1719485,ERR1719200
ERR599078	ERR3586778		ERR1726580,ERR1726872	ERR1711926,ERR1711973
ERR599084	ERR3586779		ERR1726782	ERR1711903,ERR1712162
ERR599085	ERR3586780		ERR868346	ERR1711927,ERR1712091
ERR599086	ERR3586781		ERR1726848	ERR1719497,ERR1719476
ERR599087	ERR3586782		ERR1726616	ERR1719205,ERR1719350
ERR599089	ERR3586783		ERR1726680,ERR1726641	ERR1719470,ERR1719318
ERR599093	ERR3586784		ERR1726930	ERR1712034,ERR1711925
ERR599096	ERR3586785		ERR873960,ERR873967	ERR1711864,ERR1712059
ERR599097	ERR3586786		ERR1726869	ERR1719181,ERR1719155
ERR599099	ERR3586787		ERR868433	ERR1712149,ERR1712193
ERR599100	ERR3586788		ERR1726884	ERR1719176,ERR1719480
ERR599101	ERR3586789		ERR1726888,ERR1726702	ERR1711940,ERR1712143
ERR599109	ERR3586790		ERR1726750	ERR1719494,ERR1719505
ERR599110	ERR3586791		ERR1726923,ERR1726747	ERR1719171,ERR1719241
ERR599111	ERR3586792		ERR868378	ERR1719441,ERR1719257
ERR599112	ERR3586793		ERR1726576	ERR1719277,ERR1719363
ERR599115	ERR3586794		ERR1726723	ERR1719179,ERR1719422
ERR599116	ERR3586795		ERR1726873	ERR1711889,ERR1712240
ERR599118	ERR3586796		ERR1726776	ERR1719158,ERR1719449
ERR599124	ERR3586797		ERR1726523	ERR1719188,ERR1719226
ERR599125	ERR3586798		ERR1726583	ERR1719367,ERR1719288
ERR599127	ERR3586799		ERR1726954	ERR1712112,ERR1712114
ERR599128	ERR3586800		ERR1726796	ERR1719387,ERR1719252
ERR599130	ERR3586801		ERR868477	ERR1719294
ERR599131	ERR3586802		ERR1726864	ERR1719394
ERR599132	ERR3586803		ERR1726669	ERR1719270
ERR599140	ERR3586804		ERR1726692	ERR1712163,ERR1711873
ERR599147	ERR3586805		ERR1726738	ERR1719359,ERR1719377
ERR599149	ERR3586806		ERR868398	ERR1719190,ERR1719436
ERR599152	ERR3586807		ERR1726560	ERR1712239,ERR1712082
ERR599154	ERR3586808		ERR1726650	ERR1712169,ERR1712000
ERR599157	ERR3586809		ERR868467	ERR1711877,ERR1712014
ERR599159	ERR3586810		ERR1700910	ERR1719336,ERR1719166
ERR599161	ERR3586811		ERR1726967,ERR1726948	ERR1719167
ERR599162	ERR3586812		ERR1726619	ERR1719185,ERR1719313
ERR599164	ERR3586813		ERR868420	ERR1719455,ERR1719406
ERR599165	ERR3586814		ERR1726730	ERR1719282,ERR1719227
ERR599166	ERR3586815		ERR1726886	ERR1719304,ERR1719342
ERR599167	ERR3586816		ERR1726536	ERR1712029,ERR1712111
ERR599172	ERR3586817		ERR868367	ERR1712165,ERR1712038
ERR599175	ERR3586818		ERR1700891	ERR1719244
SRR1509792	ERR3586819		ERR1726529	ERR1712230,ERR1711939
SRR1509793	ERR3586820		ERR1726957	ERR1719326
SRR1509796	ERR3586821		ERR868430	ERR1711994
SRR1509798	ERR3586822		ERR1726676	ERR1719474
SRR1509799	ERR3586823		ERR1726768	ERR1719165,ERR1719487
SRR1509800	ERR3586824		ERR1726944	ERR1719229
SRR2981515	ERR3586825		ERR1726684	ERR1719150
SRR2981523	ERR3586826		ERR1726893	ERR1719309
SRR3723780	ERR3586827		ERR1726617	ERR1712113,ERR1712099
SRR3723785	ERR3586828		ERR1700893	ERR1719192
SRR3723786	ERR3586829		ERR1726737	ERR1719495
SRR3723787	ERR3586830		ERR1726638	ERR1712089,ERR1712041
SRR3723930	ERR3586831		ERR873964	ERR1719197
SRR3723931	ERR3586832		ERR1726835	ERR1712218
SRR3723933	ERR3586834		ERR1700902	ERR1719402
SRR3726277	ERR3586835		ERR1726581	ERR1711915
SRR3726278	ERR3586836		ERR1726654	ERR1719199
SRR3726289	ERR3586837		ERR868411	ERR1719183
SRR3732449	ERR3586838		ERR1726693	ERR1719203
SRR3960572	ERR3586839		ERR1726547	ERR1712051
SRR3960579	ERR3586840		ERR1726971	ERR1719397
SRR3960580	ERR3586841		ERR1726885	ERR1719409
SRR3961047	ERR3586842		ERR868351	ERR1712228
SRR3962468	ERR3586843		ERR1726548	ERR1719273
SRR3962508	ERR3586844		ERR1726757	ERR1719425,ERR1719233
SRR3962680	ERR3586845		ERR1726764	ERR1719514,ERR1719478
SRR3962771	ERR3586846		ERR868366	ERR1719366,ERR1719163
SRR3963458	ERR3586847		ERR1726679	ERR1712083
SRR3963498	ERR3586848		ERR1726720	ERR1719338,ERR1719266
SRR3963599	ERR3586849		ERR1726877,ERR1726831	ERR1719177,ERR1719280
SRR3963622	ERR3586850		ERR1726703	ERR1719238
SRR3963658	ERR3586851		ERR1726863	ERR1711920
SRR3963982	ERR3586852		ERR1726534	ERR1719189
SRR3965586	ERR3586853		ERR1726625	ERR1719289,ERR1719193
SRR3965676	ERR3586854		ERR1726889	ERR1711969,ERR1711960
SRR3965758	ERR3586855		ERR868380	ERR1712087
SRR3966130	ERR3586856		ERR1726772	ERR1711997
SRR3967319	ERR3586857		ERR1726867	ERR1712212
SRR3967690	ERR3586858		ERR1726949	ERR1719467
SRR3967699	ERR3586859		ERR868511	ERR1712060
SRR3967905	ERR3586860		ERR1726551	ERR1719278
SRR3968062	ERR3586861		ERR1726852	ERR1719430
SRR3968770	ERR3586862		ERR1726783	ERR1719258
SRR4028167	ERR3586863		ERR868354	ERR1711990
SRR4028175	ERR3586864		ERR1726817	ERR1719382
SRR8159438	ERR3586865		ERR1726973	ERR1719400
SRR8159440	ERR3586866		ERR1726860	ERR1719209
SRR8159437	ERR3586867		ERR1726859	ERR1712158,ERR1712088
SRR8159439	ERR3586868		ERR1726911	ERR1712055
SRR8159435	ERR3586869		ERR1726824	ERR1719337,ERR1719371
SRR8159433	ERR3586870		ERR1726596	ERR1719440
ERR315856	ERR3586871		ERR868459	ERR1719454
ERR315857	ERR3586872		ERR1726589	ERR1719220
ERR315858	ERR3586873		ERR1726847	ERR1719370
ERR315859	ERR3586890		ERR1726744	ERR1712203
ERR315860	ERR3586891		ERR1726712	ERR1719417,ERR1719178
ERR315861	ERR3586892		ERR1726761	ERR1719305,ERR1719398
ERR315863	ERR3586893		ERR1726972	ERR1711934,ERR1712010
ERR318618	ERR3586894		ERR1726707	ERR1719426,ERR1719247
ERR318620	ERR3586895		ERR868375	ERR1719472,ERR1719460
ERR594288	ERR3586896		ERR1726629	ERR1719237,ERR1719275
ERR594294	ERR3586897		ERR1726545	ERR1719458,ERR1719490
ERR594304	ERR3586898		ERR1726947	ERR1719353
ERR594307	ERR3586899		ERR868445	ERR1719331
ERR594321	ERR3586900		ERR1726980	ERR1719362
ERR594342	ERR3586901		ERR1726861	ERR1719239
ERR598943	ERR3586902		ERR1726635	ERR1712032,ERR1712222
ERR598948	ERR3586903		ERR1726553	ERR1719506
ERR598951	ERR3586904		ERR868429	ERR1719174
ERR598955	ERR3586905		ERR1726919	ERR1719263
ERR598961	ERR3586906		ERR1726803	ERR1719500
ERR598963	ERR3586907		ERR1726941	ERR1719201,ERR1719182
ERR598965	ERR3586908		ERR868410	ERR1712037,ERR1712210
ERR598972	ERR3586909		ERR1726821	ERR1719151,ERR1719264
ERR598989	ERR3586910		ERR1726756	ERR1719339,ERR1719341
ERR598992	ERR3586911		ERR1726653	ERR1711896,ERR1712139
ERR598993	ERR3586912		ERR1726532	ERR1712015
ERR599003	ERR3586913		ERR868488	ERR1711993,ERR1712141
ERR599007	ERR3586914		ERR1726585	ERR1712185
ERR599024	ERR3586915		ERR1726811,ERR1726965	ERR1711953
ERR599025	ERR3586916		ERR868393	ERR1712062
ERR599028	ERR3586917		ERR1726555	ERR1711913,ERR1711874
ERR599032	ERR3586918		ERR1726956	ERR1711905,ERR1712237
ERR599035	ERR3586919		ERR1700896	ERR1712148,ERR1712074
ERR599039	ERR3586920		ERR1726786	ERR1719303,ERR1719473
ERR599040	ERR3586921		ERR1726718	ERR1712076,ERR1712226
ERR599043	ERR3586922		ERR868496	ERR1712150,ERR1712043
ERR599046	ERR3586923		ERR1726715	ERR1712105,ERR1712090
ERR599049	ERR3586924		ERR1726836,ERR1726743	ERR1719224,ERR1719453
ERR599058	ERR3586925		ERR1726802,ERR1726810	ERR1711909,ERR1712179
ERR599059	ERR3586926		ERR868403	ERR1711894,ERR1712140
ERR599063	ERR3586927		ERR1726540,ERR1726929	ERR550514
ERR599065	ERR3586928		ERR1726613,ERR1726546	ERR550539,ERR550529
ERR599066	ERR3586929		ERR318605,ERR318603,ERR538175	ERR550519
ERR599073	ERR3586930		ERR318593,ERR538177,ERR318595	ERR550521
ERR599077	ERR3586931		ERR318615,ERR318598,ERR538174	ERR550532
ERR599081	ERR3586932		ERR538173,ERR318582	ERR550534
ERR599092	ERR3586933		ERR318594,ERR318583,ERR538171	ERR1711898,ERR1712167
ERR599094	ERR3586934		ERR538185,ERR318600	ERR1712184,ERR1712110
ERR599095	ERR3586935		ERR868418	ERR1719216,ERR1719361
ERR599108	ERR3586936		ERR1700913	ERR1711984,ERR1712030
ERR599114	ERR3586937		ERR1726855	ERR1712022,ERR1711998
ERR599121	ERR3586938		ERR1726618,ERR1726672	ERR1711910,ERR1711936
ERR599122	ERR3586939		ERR868356	ERR1719242
ERR599133	ERR3586940		ERR1726722	ERR1711947,ERR1712208
ERR599135	ERR3586941		ERR1726976	ERR1712006,ERR1711918
ERR599136	ERR3586942		ERR1726787	ERR1712052,ERR1712016
ERR599138	ERR3586943		ERR868402	ERR550392,ERR550397
ERR599145	ERR3586944		ERR1726673	ERR550394,ERR550389
ERR599146	ERR3586945		ERR318592,ERR318617,ERR318612,ERR318588,ERR318606,ERR318591	ERR550525
ERR599148	ERR3586946		ERR538178,ERR318589,ERR318602	ERR550517
ERR599150	ERR3586947		ERR318616,ERR318585,ERR538189	ERR1719465,ERR1719240
ERR599151	ERR3586948		ERR318609,ERR318614,ERR318608,ERR318610,ERR318587,ERR318596	ERR1711945,ERR1712064
ERR599153	ERR3586949		ERR868487,ERR868400	ERR1711955,ERR1712243
ERR599163	ERR3586950		ERR1700904	ERR1719511,ERR1719414
ERR599169	ERR3586951		ERR1726554	ERR1719152,ERR1719488
ERR599170	ERR3586952		ERR1726843,ERR1726920	ERR1712011,ERR1712122
ERR599171	ERR3586953		ERR868428,ERR868406	ERR1719383,ERR1719374
ERR599174	ERR3586954		ERR1726951	ERR1719421,ERR1719274
SRR3960577	ERR3586955		ERR1726809,ERR1726794	ERR1719328,ERR1719255
SRR3963804	ERR3586956		ERR868414	ERR1719399,ERR1719248
SRR3964650	ERR3586957		ERR1726736	ERR1711871,ERR1711968
SRR3968063	ERR3586958		ERR868498,ERR868503	ERR1719322,ERR1719351
SRR8159434	ERR3586959		ERR1700914	ERR1719259,ERR1719423
ERR594326	ERR3586960		ERR1700906,ERR1700907	ERR1712196,ERR1711861
ERR599011	ERR3586961		ERR868454	ERR1719323,ERR1719429
ERR599045	ERR3586962		ERR1726915	ERR1712126,ERR1712133
ERR599080	ERR3586963		ERR1726686,ERR1726526	ERR1712065,ERR1711916
ERR599119	ERR3586967		ERR868368,ERR868484	ERR1711880,ERR1711991
ERR599120	ERR3586968		ERR868397,ERR868408	ERR1719502,ERR1719267
ERR599142	ERR3586969		ERR1700899	ERR1712211,ERR1712107
ERR599173	ERR3586970		ERR1726587,ERR1726979	ERR1712209,ERR1712012
ERR315862	ERR3586971		ERR1700889	ERR1712136,ERR1712135
ERR594315	ERR3586972		ERR1726549	ERR1719434,ERR1719284
ERR594316	ERR3586973		ERR1726940,ERR1726862	ERR1711890,ERR1712080
ERR594318	ERR3586974		ERR1726591,ERR1726582	ERR1719450,ERR1719392
ERR594340	ERR3586975		ERR1726908	ERR1712227,ERR1711868
ERR598949	ERR3586976		ERR1700892	ERR1712159,ERR1712164
ERR598952	ERR3586977		ERR868409	ERR1711996,ERR1712229
ERR598959	ERR3586978		ERR1700912	ERR1712018,ERR1711944
ERR598962	ERR3586979		ERR1726754,ERR1726925	ERR1712023,ERR1712005
ERR598966	ERR3586980		ERR868486	ERR1712213,ERR1711963
ERR598969	ERR3586981		ERR1700890	ERR1719210,ERR1719346
ERR598970	ERR3586982		ERR1726844	ERR1712235,ERR1712131
ERR598973	ERR3586983		ERR1726820,ERR1726652	ERR1719218,ERR1719498
ERR598974	ERR3586984		ERR868478	ERR1712170,ERR1711976
ERR598977	ERR3586985		ERR1726784	ERR1711893,ERR1712044
ERR598979	ERR3586986		ERR1726729	ERR1712035,ERR1711980
ERR598982	ERR3586987		ERR1726614	ERR1712026,ERR1711919
ERR598990	ERR3586988		ERR1726897	ERR1712145,ERR1712198
ERR598996	ERR3586989		ERR868399	ERR1711901,ERR1712146
ERR598997	ERR3586990		ERR1726531	ERR1719378
ERR599006	ERR3586991		ERR868355	ERR1712189,ERR1712221
ERR599010	ERR3586992		ERR1700909	ERR1719507
ERR599012	ERR3586993		ERR868510,ERR868437,ERR868435	ERR1719432,ERR1719222
ERR599013	ERR3586994		ERR1700908,ERR1700900	ERR1719198
ERR599016	ERR3586995		ERR868369	ERR1712004,ERR1712047
ERR599017	ERR3586996		ERR1726542	ERR1712116,ERR1711928
ERR599018	ERR3586997		ERR1726827	ERR1712053,ERR1712173
ERR599019	ERR3586998		ERR1726671	ERR1712138,ERR1712171
ERR599022	ERR3586999		ERR868370	ERR1712002,ERR1711921
ERR599036	ERR3587000		ERR1726813	ERR1711866,ERR1712187
ERR599041	ERR3587001		ERR868391	ERR1711978,ERR1712092
ERR599042	ERR3587002		ERR1726854	ERR1712234,ERR1711872
ERR599056	ERR3587003		ERR1726726	ERR1719408,ERR1719306
ERR599068	ERR3587004		ERR1726651	ERR1712188,ERR1712017
ERR599069	ERR3587005		ERR1726921	ERR1719411,ERR1719415
ERR599075	ERR3587006		ERR1726697	ERR1712033,ERR1712121
ERR599079	ERR3587007		ERR599328	ERR1711907,ERR1712199
ERR599082	ERR3587008		ERR599296	ERR1712019,ERR1712048
ERR599088	ERR3587009		ERR599249	ERR1719349,ERR1719461
ERR599091	ERR3587010		ERR599280	ERR1719283,ERR1719334
ERR599098	ERR3587011		ERR599222	ERR1712125,ERR1712232
ERR599102	ERR3587012		ERR599314,ERR1726808	ERR1711950,ERR1712024
ERR599103	ERR3587013		ERR599294,ERR1726978	ERR1711931,ERR1712168
ERR599104	ERR3587014		ERR599226	ERR1711943,ERR1712100
ERR599105	ERR3587015		ERR599299	ERR1711878,ERR1712045
ERR599106	ERR3587016		ERR599244	ERR1712042,ERR1712142
ERR599107	ERR3587017		ERR599266	ERR1712151,ERR1712084
ERR599113	ERR3587018		ERR599321	ERR1712130,ERR1712233
ERR599123	ERR3587019		ERR1726649,ERR599247	ERR1712154,ERR1712244
ERR599126	ERR3587020		ERR599282	ERR1719251,ERR1719384
ERR599129	ERR3587021		ERR599205	ERR1719390,ERR1719261
ERR599134	ERR3587022		ERR599210,ERR1740328	ERR1719516,ERR1719348
ERR599137	ERR3587023		ERR599218	ERR1719352,ERR1719504
ERR599139	ERR3587024		ERR599320,ERR1726800	ERR1712192,ERR1712181
ERR599141	ERR3587025		ERR599312	ERR1712216,ERR1712205
ERR599143	ERR3587026		ERR599318,ERR599300	ERR1711971,ERR1712172
ERR599155	ERR3587027		ERR599231	ERR1719464,ERR1719302
ERR599158	ERR3587028		ERR599261	ERR1719234,ERR1719180
ERR599168	ERR3587029		ERR599208	ERR1719287,ERR1719253
ERR599176	ERR3587030		ERR599301,ERR1726663	ERR1719296,ERR1719416
SRR1509794	ERR3587031		ERR1726689,ERR599277	ERR1719319,ERR1719509
SRR3960505	ERR3587035		ERR599302	ERR1719154,ERR1719452
SRR3961935	ERR3587036		ERR599238	ERR1711906,ERR1711966
SRR3963457	ERR3587037		ERR599295	ERR1719269,ERR1719271
SRR3963571	ERR3587038		ERR599269	ERR1719407,ERR1719482
SRR3963805	ERR3587039		ERR599255	ERR1712183,ERR1712119
SRR3967558	ERR3587040		ERR599284	ERR1719466,ERR1719427
SRR3968060	ERR3587041		ERR599236	ERR1712202,ERR1712096
SRR3968061	ERR3587042		ERR599229	ERR1719484,ERR1719344
ERR318619	ERR3587043		ERR599259,ERR1726630	ERR1719442,ERR1719291
ERR318621	ERR3587044		ERR599248	ERR1719508,ERR1719186
	ERR3587045		ERR599257	ERR1719418,ERR1719501
	ERR3587046		ERR599223	ERR1712094,ERR1711924
	ERR3587047		ERR599304	ERR1719486,ERR1719451
	ERR3587048		ERR599243	ERR1719517,ERR1719221
	ERR3587049		ERR599305	ERR1719225,ERR1719340
	ERR3587050		ERR599331	ERR1719153,ERR1719260
	ERR3587051		ERR599241,ERR1726969	ERR1712057,ERR1711959
	ERR3587052		ERR599258,ERR1726899	ERR1712190,ERR1712056
	ERR3587053		ERR599313	ERR1711962,ERR1712180
	ERR3587054		ERR599307	ERR1712236,ERR1712215
	ERR3587055		ERR599317	ERR1712156,ERR1712109
	ERR3587090		ERR599292	ERR1711899,ERR1712223
	ERR3587091		ERR599287	ERR1711948,ERR1712039
	ERR3587092		ERR599204	ERR1712186,ERR1712061
	ERR3587093		ERR599256	ERR1719195,ERR1719325
	ERR3587094		ERR599286	ERR1719369,ERR1719315
	ERR3587095		ERR599329,ERR1726780	ERR1719357,ERR1719268
	ERR3587096		ERR1726950,ERR599333,ERR1726607	ERR1712031,ERR1712046
	ERR3587097		ERR1726565,ERR599303	ERR1712079,ERR1712073
	ERR3587098		ERR599253,ERR1740326	ERR1712217,ERR1711870
	ERR3587099		ERR1726626,ERR599332	ERR1711887,ERR1711970
	ERR3587100		ERR1726937,ERR599326,ERR1726731	ERR1711863,ERR1712001
	ERR3587101		ERR1726678,ERR599336	ERR1711891,ERR1711888
	ERR3587102		ERR599240,ERR1740324	ERR1712220,ERR1711908
	ERR3587103		ERR599262	ERR1013385,ERR1013384
	ERR3587104		ERR1726825,ERR599265	ERR1711876,ERR1712242
	ERR3587105		ERR599237	ERR1719285,ERR1719173
	ERR3587106		ERR599250	ERR550537
	ERR3587107		ERR599263	ERR550388
	ERR3587108		ERR599245	ERR550387,ERR550402
	ERR3587109		ERR315803,ERR315811,ERR538182	ERR550396,ERR550403
	ERR3587110		ERR538181	ERR550381,ERR550393
	ERR3587111		ERR315804,ERR315799,ERR315816,ERR315806,ERR315818	ERR1739840,ERR1739842
	ERR3587112		ERR538176,ERR315809	ERR1739844,ERR1739846
	ERR3587113		ERR315802,ERR315821	ERR1719431,ERR1719435
	ERR3587114		ERR538183,ERR315827	ERR1711967,ERR1712070
	ERR3587115		ERR868483	ERR1719475,ERR1719446
	ERR3587116		ERR1726906	ERR1719330,ERR1719512
	ERR3587117		ERR1726758	ERR1719376,ERR1719489
	ERR3587118		ERR1726648	ERR1740123,ERR1740116
	ERR3587119		ERR1726733	ERR1740120,ERR1740121
	ERR3587120		ERR868387	ERR1740129,ERR1740122
	ERR3587121		ERR1726636	ERR1740127,ERR1740138
	ERR3587122		ERR1726819	ERR1739839,ERR1739838
	ERR3587123		ERR1726573	ERR1712008,ERR1711956
	ERR3587124		ERR1726530	ERR1711935,ERR1712021
	ERR3587125		ERR1726706	ERR1712128,ERR1712106
	ERR3587126		ERR868372	ERR1719149,ERR1719424
	ERR3587127		ERR1726853	ERR1712194,ERR1712085
	ERR3587128		ERR599209	ERR1712123,ERR1711892
	ERR3587129		ERR599319	ERR1712153,ERR1712086
	ERR3587130		ERR599279	ERR1712129,ERR1712204
	ERR3587131		ERR599298	ERR1740125,ERR1740126
	ERR3587132		ERR599293	ERR1712071,ERR1712191
	ERR3587133		ERR599232	ERR1740119,ERR1740128
	ERR3587134		ERR599306	ERR1712127,ERR1712231
	ERR3587135		ERR599234	ERR1711865,ERR1712028
	ERR3587136		ERR1700898	ERR1719162,ERR1719157
	ERR3587137		ERR1726928	ERR1719148,ERR1719491
	ERR3587138		ERR868388	ERR1719196,ERR1719483
	ERR3587139		ERR1726572	ERR1712238,ERR1712161
	ERR3587140		ERR599254	ERR1712166,ERR1712195
	ERR3587141		ERR1740325,ERR599270	ERR1719272,ERR1719345
	ERR3587142		ERR599224	ERR1711957,ERR1712160
	ERR3587143		ERR599283	ERR1719469,ERR1719246
	ERR3587144		ERR599291	ERR1740134,ERR1740137
	ERR3587145		ERR599325	ERR1740117,ERR1740115
	ERR3587146		ERR599239	ERR1740135,ERR1740139
	ERR3587147		ERR599206,ERR1740327	ERR1740136,ERR1740124
	ERR3587148		ERR599310	ERR1740133,ERR1740130
	ERR3587149		ERR599288	ERR1719503,ERR1719329
	ERR3587150		ERR599335	ERR1719223,ERR1719276
	ERR3587151		ERR599281	ERR1719215,ERR1719444
	ERR3587154		ERR599214	ERR1719468,ERR1719360
	ERR3587155		ERR599264	ERR1719354,ERR1719457
	ERR3587156		ERR868413	ERR1719386,ERR1719265
	ERR3587157		ERR1726749,ERR1726645	ERR1719496,ERR1719250
	ERR3587158		ERR1726632	ERR1712013
	ERR3587159		ERR1726850	ERR1719477,ERR1719206
	ERR3587160		ERR1726790,ERR1726895	ERR1711938,ERR1712009
	ERR3587161		ERR868358	ERR1719317,ERR1719513
	ERR3587162		ERR1700901	ERR1719320,ERR1719212
	ERR3587163		ERR1726627	ERR1712103,ERR1711965
	ERR3587164		ERR1726952	ERR1712108,ERR1711974
	ERR3587165		ERR868416	ERR1719479,ERR1719510
	ERR3587166		ERR1726719	ERR1719219
	ERR3587167		ERR1726878	ERR1712093,ERR1712225
	ERR3587168		ERR1726876	ERR1711900,ERR1711964
	ERR3587169		ERR873966,ERR873961	ERR1711941,ERR1711879
	ERR3587170		ERR1700897,ERR1700905	ERR1719433,ERR1719492
	ERR3587171		ERR1726710,ERR1726603	ERR1719368,ERR1719184
	ERR3587172		ERR1726900	ERR1712097,ERR1712075
	ERR3587173		ERR868379	ERR1712007,ERR1712206
	ERR3587174		ERR1726735,ERR1726896	ERR1711995,ERR1711932
	ERR3587175		ERR1726970	ERR1711922,ERR1712200
	ERR3587176		ERR1726541
	ERR3587177		ERR868473
	ERR3587178		ERR1700894
	ERR3587179		ERR868407
	ERR3587180		ERR1726662,ERR1726681
	ERR3587181
	ERR3587182
	ERR3587183
	ERR3587184
	ERR3587185
	ERR3587186
	ERR3587187
	ERR3587188
	ERR3587189
	ERR3587190
	ERR3587191
	ERR3587192
	ERR3587193
	ERR3587194
	ERR3587195
	ERR3587196
	ERR3587197
	ERR3587198
	ERR3587199
	ERR3587200
	ERR3587201
	ERR3587202
	ERR3587203
	ERR3587204
	SRR6189000
	SRR6189001
	SRR6189002
	SRR6189029
	SRR6189030
	SRR6189080
	SRR6189099
	SRR6189108
	SRR6189109
	SRR6189110
	SRR6189111
	SRR6189112
	SRR6189131
	SRR6189143
	SRR6189144
	SRR6189145
	SRR6189146
	SRR6189147
	SRR6189148
	SRR6189149
	SRR6189150
	SRR6189151
	SRR6189362
	SRR6189363
	SRR6189364
	SRR6189413
	SRR6189414
	SRR6189415
	SRR6189416
	SRR6189418
	SRR6189419
	SRR6189540
	SRR6189541
	SRR6189542
	SRR6189548
	SRR6189549
	SRR6189550
	SRR6214941
	SRR6214944
	SRR6215535
	SRR6216191
	SRR6216377
	SRR6216401
	SRR6216885
	SRR6216921
	SRR6216969
	SRR6217698
	SRR6217760
	SRR6217786
	SRR6217951
	SRR6218411
	SRR6218633
