# Supplementary material for: Metaproteomic analysis decodes the trophic basis of microbes in the dark ocean
Source: Research Square preprint supplement (doi:10.21203/rs.3.rs-2727130/v1), 2023-04-07
Supplement: Supplementary file 3 [file Supplementary dataset4.xlsx]

## Sheet: Sheet2
			Exo																				FL																						PA
			Bathy										Epi					Meso					Bathy											Epi					Meso						Bathy
			A1	A3	A5	M3_1500m	M4_3500m	M4_4000m	ST14_2000m	ST17_1500m	ST4_2000m	ST7_2000m	BR	CH	OO	ST13_75m	ST6_100m	M2_400m	M2_450m	ST15_600m	ST16_500m	ST6_400m	A1	A3	A5	M3_1500m	M4_3500m	M4_4000m	ST14_2000m	ST16_1000m	ST17_1500m	ST4_2000m	ST7_2000m	BR	CH	OO	ST13_75m	ST6_100m	M2_400m	M2_450m	ST10_200m	ST15_600m	ST16_500m	ST6_400m	A1	A3	A5	M3_1500m	M4_3500m
		% of total metaproteome	92.1515	88.7926	88.5556	83.5268	88.5686	90.6883	91.3395	89.871	67.8709	92.8501	90.5983	87.1346	78.1189	90.8304	94.495	79.499	86.7947	92.3086	89.0072	89.7889	89.9231	86.8567	85.259	94.5542	96.3911	95.8051	93.7808	95.0646	92.418	96.5005	94.2786	87.8997	87.8331	86.5234	91.7523	92.4763	92.7107	93.0524	94.6706	92.5428	87.239	92.0366	97.0548	94.1211	93.3767	95.7561	94.7106
significance	KO	description
shared	K00003	hom; homoserine dehydrogenase [EC:1.1.1.3]	0.000476911	0.000112845	0.0317037	0.0276761	0.00119698	0.102711	0.00333021	0.00319917	7.9436e-06	0.00115257	0.000324286	4.98393e-05	0.00100976	2.92144e-05	0.00126563	0.000428208		0.0145686	0.00282658	0.0043362	0.000524185	0.014745	0.0233844	0.0145045	0.00425566	0.00790049	0.00190882		0.00175576	8.61249e-05	0.000469233	0.0201237	0.000216418	0.000207456	0.00202832	0.00160395	0.00523177	0.00207664	1.09468e-05	5.6302e-05	0.000311851	0.00293584	4.48229e-05	0.00430491	3.07075e-05	0.00180456	0.000512832
shared	K00015	gyaR, GOR1; glyoxylate reductase [EC:1.1.1.26]					0.00365609		0.00105195	0.00147827		6.35922e-05	0.0145019	0.00946491	0.00082353		0.000401157	3.21647e-05	5.2886e-05	0.000274753	0.00107315	0.000206718	0.00283919	0.01019	0.0184762	0.00482604	0.00900972	0.0139754	0.0224359	0.00017113	0.000421502	0.000108813	0.000556705	0.00951927	0.00471585	0.00066928	0.00523662	0.00176059	0.00177441	0.00114975	0.000860307	0.000127215	0.00428483	0.00918708	0.00399323	0.00770746	0.00183315	0.00800486	7.32309e-05
shared	K00101	lldD; L-lactate dehydrogenase (cytochrome) [EC:1.1.2.3]	0.000144775	0.00275915	0.00706284	2.96199e-05	0.0216319	0.00368467	0.0018595	0.0237662	7.12782e-05	0.000835148	0.000578474	0.00245821		0.0023358	0.00657903	0.000552721	1.98029e-05	0.00131212	0.000884763	0.00086199	0.00106877										0.000737651				0.000257777		0.000467963	0.000574185	0.000816085	4.24926e-05	3.14053e-05		0.00129375	0.00339254	0.0180837	0.000641251
shared	K00135	gabD; succinate-semialdehyde dehydrogenase / glutarate-semialdehyde dehydrogenase [EC:1.2.1.16 1.2.1.79 1.2.1.20]	0.019106	0.0108292	0.00909069	0.0035589	0.0144986	0.0551598	0.00353531	0.021061	0.00106869	0.00181073	0.00640035	0.00275465	0.00317673	0.00102862	0.00204079	0.0029279	0.00789892	0.00257939	0.00997159	0.00323424	0.213444	0.51239	0.558494	0.0669671	0.0223912	0.0129274	0.0959148	0.00535437	0.0342497	0.0752169	0.0190981	0.0905653	0.131221	0.0540166	0.0160159	0.0181059	0.0817776	0.0514444	0.00953722	0.0204247	0.0344254	0.0343625	0.03322	0.0692808	0.0324621	0.0127947	0.0193407
shared	K00150	gap2, gapB; glyceraldehyde-3-phosphate dehydrogenase (NAD(P)+) (phosphorylating) [EC:1.2.1.59]					0.000445066	1.71634e-05	2.29707e-05	0.000155948		0.000654195	2.73701e-05	0.00101577						0.00556411			0.00132229	0.00459294	0.00173479	0.00461546	0.00225384	0.00262836	0.00112063	0.000130632	0.00209719	0.00115386	0.00125044	0.000423586	0.00310058	0.00295383	0.209537	0.0193081	0.00478098	0.0015965	0.00135395	0.000873112	0.000345843	0.00167623	0.0102693	0.0292474	0.00759551	0.010695	0.00981157
shared	K00210	sdhC, frdC; succinate dehydrogenase cytochrome b subunit	0.000248987	6.54425e-06	1.16489e-06	1.63411e-05	1.33236e-05	1.8303e-05	0.000192274	0.00185745	1.59909e-05	0.00119798	0.000242698	7.78262e-05	3.84764e-05	0.000112167	6.58995e-06	2.64306e-06	0.000720207	0.000174302	6.56591e-05	7.51678e-05	0.00356811	0.00648983	0.002595	0.000572222	0.000602223	0.00275891	7.54924e-06			0.000186692	0.000638272	0.00035432	0.000262167		0.000414278		2.23917e-05		0.000239608	4.43632e-05	1.75445e-05	1.10591e-05	9.241e-05	0.0017836	0.00640457	0.000216339	0.00171769
shared	K00241	ACADS, bcd; butyryl-CoA dehydrogenase [EC:1.3.8.1]	0.189128	0.0518712	0.102667		0.000622484	0.00292551	0.00506263	0.000883511	0.000954107	0.0391685	0.00247319	0.000397027		0.00226273	0.000317922	0.000243451	0.00342542	0.000165293	0.00228521	0.00402093		0.00025844				0.000569527	0.000746406		0.00321282					0.000601947	0.000509256						0.000614439	0.000374085		0.000595549	0.000487529	0.00566849	0.000169968
shared	K00248	sthA, udhA; NAD(P) transhydrogenase [EC:1.6.1.1]	0.042573	0.115859	0.0304645	0.00081047	0.00315513	0.000558181	0.0207625	0.01075	0.0812969	0.0196621	0.0147805	0.0252757	0.00541062	0.00496103	0.0917362	0.000361118	0.000968704	0.0332282	0.0173936	0.0443453	0.0839429	0.0388009	0.031036	0.0190066	0.0102797	0.00732097	0.0243773	0.00258741	0.0101486	0.030654	0.0132647	0.00121233	0.00373594	0.00183469	0.0112883	0.00117188	0.0160617	0.0589355	0.0336797	0.0113028	0.00345574	0.0250205		0.0033331	0.00297655
shared	K00322	hoxH; NAD-reducing hydrogenase large subunit [EC:1.12.1.2]	0.00808417	0.025151	0.00497613	0.00106887	0.00123398	0.00215295	0.00743138	0.00796743	0.0116362	0.00135657	0.000839254	0.00268817	0.00076452	0.00294167	0.0025484	0.000761555	0.00149612	0.00724489	0.00922455	0.0122322	0.000861954	0.0162011	0.0307164	0.00742019	0.00242314	0.002961	0.0143319	0.00381298	0.00465418	0.00314092	0.00875457	0.00682664	0.00431278	0.00257006	0.00409689	0.00241223	0.00643051	0.00560021	0.00605253	0.00879414	0.000898916	0.011899	2.7539e-05	0.0015105	0.000844974
shared	K00436	alkB1_2, alkM; alkane 1-monooxygenase [EC:1.14.15.3]																						2.3458e-05									7.25692e-05		6.71544e-05		0.00121439		0.000254844		7.13895e-05				0.000135438	0.000656475	0.00129887	0.00156329	0.00137881
shared	K00496	nodU; carbamoyltransferase [EC:2.1.3.-]	8.08663e-05	0.000326808					0.000170398		1.70249e-05	4.09769e-06					8.89156e-05				0.000341232	0.000382229	6.44086e-05	0.000771249	0.00203123	0.000263315	0.000278667	0.000269936	0.000140328	0.00133847	0.00102405	0.000412122	0.00127765	0.00264974	0.000993453	4.90683e-05	0.00256514	0.000388119	0.00651464	0.00426789	0.00245343	0.0011839	0.00015514	0.00133123
shared	K00612	udp, UPP; uridine phosphorylase [EC:2.4.2.3]																					0.00199893	0.370163	0.0661362	0.0782956	0.221978	0.0913172	0.0284414	0.00500867	0.00453257	0.144824	0.00127457	0.00185132		0.00131821	0.00183182	0.00778177	0.00113826	0.00994934	0.000963838	0.0137743	0.00892545	6.13133e-05	12.4803	16.7141	20.3038	0.199056	7.09792
shared	K00757	ASP5; aspartate aminotransferase, chloroplastic [EC:2.6.1.1]	0.000102349	0.000177299	2.91787e-05	0.000975944	9.43242e-05	0.000148879	0.000587154	0.00234647	2.28947e-05	1.63634e-05	0.0274966	0.042377	3.61683e-05	0.033923	0.0006091	0.00038377	0.000836701	0.000198447	0.000151382	0.000367751	9.49546e-05	0.00031693	3.84128e-05	2.62586e-05		1.86293e-05	0.000687083	3.68685e-05	8.07238e-05	3.44156e-05			5.67287e-05		0.000825215	0.000194288	0.000118821	1.68877e-05	5.4447e-05	9.77652e-05	0.00104075	9.08418e-05	2.51905e-05	3.30786e-05	0.00047834
shared	K00811	E2.7.1.4, scrK; fructokinase [EC:2.7.1.4]																						0.000798161	0.00111929	4.20815e-06			5.40645e-06	7.23595e-05	0.000477082		1.68988e-05				0.00015385		4.35496e-06	2.0941e-05	3.30151e-05	0.000173113	5.50918e-06	1.56094e-05				0.000234956
shared	K00847	cysC; adenylylsulfate kinase [EC:2.7.1.25]	3.72104e-05	7.674e-06			4.02394e-05		2.15327e-05	0.000722707	7.96018e-07	0.000834914		0.000337959		3.3243e-05	1.63645e-05	7.89245e-05	0.00014464	0.000119918	1.24678e-05	2.98779e-05		0.000896659	0.000288427	0.000159335		0.000169046	0.00179125	0.000132906	0.000845334	0.000620593	4.01233e-05	0.00357828	0.00642852		0.000476635	0.0027422	2.25792e-05	3.26979e-05	1.00029e-05		0.000732656	8.36981e-05	0.00949831	0.000761385	0.00053412	0.000252372
shared	K00860	glpK, GK; glycerol kinase [EC:2.7.1.30]	0.00303596	0.0238559	0.0210074	0.000231022	0.00679173	0.00203955	0.0392169	0.00453289	0.00314234	0.00804109	0.00573249	0.0492831	0.00654391	0.000428447	0.0339357	1.74679e-05	0.0623712	0.01113	0.0358364	0.0550809	0.000227872	0.00548333	0.00266359	0.00931845	0.000212222		2.94274e-05	0.000297887		3.13604e-05	0.000305598		0.00642974	0.0288205	0.0400071	0.000210126	0.000447781	0.0112241	0.000422375	0.0155057	0.00230089	0.000197389	0.000545187	0.00719937		0.000688445	0.00675396
shared	K00864	PGK, pgk; phosphoglycerate kinase [EC:2.7.2.3]	0.0866294	0.0909005	0.103197	0.00940584	0.0464812	0.00960921	0.0575117	0.023056	0.0102955	0.0865821	0.208235	0.0921105	0.161186	0.0977562	0.15644	0.0115023	0.036967	0.0481919	0.0124332	0.287966	0.00540867	0.00986724	0.0287483	0.00960387	0.0134307	0.0102511	0.0572964	0.00134244	0.00236073	0.0112699	0.00181352	0.0136829	0.0445094	0.0171486	0.00256176	0.230397	0.00674555	0.00525315	0.00224911	0.00275251	0.215865	1.49919
shared	K00927	sat, met3; sulfate adenylyltransferase [EC:2.7.7.4]	0.0175617	0.0517514	0.0354605	0.0534652	0.0510954	0.113002	0.169309	0.0659069	0.0182783	0.0848147	0.0568942	0.111939	0.0406227	0.122475	0.0659376	0.00374353	0.0105565	0.126115	0.232439	0.199921	0.00305561	0.0144514	0.0332365	0.011394	0.00840972	0.00263225	0.0126384	0.00419788	0.00396701	0.0308433	0.00708736	0.0118075	0.0217101	0.0109043	0.120073	0.0539848	0.00888957	0.00567505	0.00823744	0.00303752	0.0166014	0.00997078	0.103337	0.0408131	0.0916938	0.0297245	2.7404
shared	K00958	pcnB; poly(A) polymerase [EC:2.7.7.19]	5.54697e-05	0.000747395		0.00015348			0.000254001	0.00855305	0.000180522			0.000277234	0.00591984	0.00215388	0.00196521	0.00028186	0.000181825	0.000689141	0.000168341	0.00175975	0.000130323	0.0301043	0.037523	0.00338239	0.00343533	0.00322152	0.00535104	0.00382798	0.00398405	0.00280628	0.0071312	0.0302056	0.0505326	0.222035	0.02159	0.0178497	0.0089864	0.0071519	0.00643203	0.00266462	0.00980039	0.012347	0.000271751	0.00447915	0.00506033	0.00222946	0.000138811
shared	K00970	rfbA, rmlA, rffH; glucose-1-phosphate thymidylyltransferase [EC:2.7.7.24]	0.0195182	0.0135016	0.0117436	0.000186731	0.051433	0.0943091	0.0212286	0.00188344	0.00362219	0.0150847	0.0016433	0.00760057	0.000873619	0.000349384	0.0208516	0.00938609	0.00505032	0.00187614	0.0144142	0.00682092	0.24664	0.207628	0.0521948	0.216333	0.423998	0.568051	0.492308	0.520318	0.277103	1.85353	0.930684	0.00283558	0.00477194	0.00386794	0.127946	0.205556	0.160469	0.434403	0.529239	0.34431	0.29092	0.403858	1.33642	2.18884	0.722154	0.101895	0.379708
shared	K00973	cca; tRNA nucleotidyltransferase (CCA-adding enzyme) [EC:2.7.7.72 3.1.3.- 3.1.4.-]	0.00557881	0.0413653	0.0100242	0.0224635	0.0210523	0.0485175	0.0068142	0.00022488	0.000295008	0.00645764	0.0145508	0.00669718	0.0046136	0.00262852	0.00139877	0.000835587	0.0279373	0.00459093	0.00772202	0.0210414	0.00223216	0.00929653	0.00794122	0.0325415	0.065617	0.0199827	0.00960506	0.0343706	0.0256795	0.0051188	0.0158456	0.00684762	0.0058617	0.0235144	0.0242855	0.00285347	0.0189762	0.0180044	0.0373962	0.0347088	0.0247691	0.0264232	0.000408932	0.00811431	0.00247483	0.00283426
shared	K00974	TPP1, CLN2; tripeptidyl-peptidase I [EC:3.4.14.9]	0.00622474	0.00050397	0.00102081	4.4954e-05	0.0511135	0.0885082	0.0143816	0.000161752	0.00188274	0.00212239	0.000287703	7.0839e-05		3.62218e-05	0.00794907	0.0093761	0.00469829	0.000164868	0.00844174	0.00263353	0.24664	0.207378	0.0515106	0.216311	0.423468	0.567736	0.492156	0.519782	0.27701	1.85353	0.930486	0.00283558	0.00476274	0.00379897	0.127812	0.205389	0.160306	0.434246	0.529061	0.344062	0.290608	0.402843	1.33642	2.18884	0.722154	0.101895	0.379708
shared	K01279	KLKB1; plasma kallikrein [EC:3.4.21.34]																					0.000443256	0.0011818	0.00113184	0.00299611	0.00106086	0.000961404	0.00489513	0.000707025	0.000991484	0.00786845	0.00244427	0.000214727	0.000200996	0.00081045	0.0018885	0.00338494	0.0028414	0.000581314	0.000416521	0.0012706	0.00405939	0.0023326	0.00165602	0.00162538	0.000839353	0.000459221	0.000316547
shared	K01324	CTSH; cathepsin H [EC:3.4.22.16]	0.0157471	0.00700099	0.0379728				5.91594e-05	5.7197e-05	5.6845e-06	0.000171162	2.57685e-06	0.00010311						2.18834e-05		1.29463e-06	0.208716	0.0414513	0.0615707	1.06939	0.0186214	0.0328604	0.00104719	0.000482775	0.000368561	0.000547514	0.00027124	4.91474e-06	0.000134996	0.00107975	0.000198174	0.000400351	0.00208455	0.000292065	8.00083e-05	0.000104321	0.00164714	0.00166616		0.000282335
shared	K01366	CTSS; cathepsin S [EC:3.4.22.27]			4.96259e-05							0.00204761				0.00133157		0.00127253																			0.0919936	0.00803582			0.0742299				0.0013122	7.1775e-05	0.000906858		0.00076003
shared	K01368	OSGEP, KAE1, QRI7; N6-L-threonylcarbamoyladenine synthase [EC:2.3.1.234]			5.9258e-06							0.000244504				0.000159003		0.000151953						0.0013581											0.00340913		0.00088912	0.000719358							0.000122503	6.70073e-06	8.46619e-05		7.09545e-05
shared	K01409	E3.5.1.1, ansA, ansB; L-asparaginase [EC:3.5.1.1]	0.0014418	0.00697984	0.00133765	0.000101695	0.00210225	0.0162172	0.00567827	0.00066432	0.000689179	0.000164672	0.00104413	5.14385e-05		0.000716167	0.000998961	0.00126253	0.000490847	0.0026359	0.00570685	0.02174								0.00108267	0.00145994										0.000791629	0.00171657			0.000447904	0.000706125		0.000107415	0.000515512
shared	K01424	E3.5.1.4, amiE; amidase [EC:3.5.1.4]	7.29138e-05	0.000812953	0.000732913	0.000908944	0.000300667	0.000725052	0.000769953	0.000209851	0.000160537	0.000324514		0.00119945	0.000164261	2.99408e-05	4.02344e-05				0.00297839	0.00347721	0.00350341	0.00276462	0.00257727	0.0024557	0.000526303	0.00156978	0.000607604	0.00432748	0.00415769	0.00041971	0.00289769	0.00304296	0.00409868	0.000829235	0.00638479	0.00017349	0.00115689	0.00325736	0.00682105	0.0154521	0.0102419	0.00121166
shared	K01426	cbh; choloylglycine hydrolase [EC:3.5.1.24]	0.014486	0.00832061	0.0571506	0.0169768	0.0122401	0.0648666	0.0138108	0.0340774	0.00813086	0.0149917	0.0131978	0.0101596	0.0137234	0.0121483	0.0208573	0.000715597	0.000579008	0.0232026	0.00923762	0.0106949	0.00797326	0.0102684	0.0230114	0.0130455	0.0112236	0.011504	0.00467833	0.00730554	0.00239714	0.00975732	0.00583378	0.00352651	0.0116579	0.000753845	0.00124394	0.0032344	0.00690195	0.00341845	0.00788948	0.00441582	0.00456929	0.011964
shared	K01442	URA4, pyrC; dihydroorotase [EC:3.5.2.3]																						0.00172201	0.000789425	5.40364e-05		4.58417e-05					0.000131996			0.000167385			5.46117e-05				5.27092e-06		0.000150449	0.000158625	0.000192255	0.000766807	0.000161809
shared	K01465	folD; methylenetetrahydrofolate dehydrogenase (NADP+) / methenyltetrahydrofolate cyclohydrolase [EC:1.5.1.5 3.5.4.9]	0.12792	0.195423	0.0373522	0.0579918	0.0148019	0.107358	0.0170379	0.0352196	0.457971	0.0453186	0.0537675	0.018092	0.00589999	0.0158981	0.0151473	0.0018407	0.000998039	0.018933	0.0278947	0.0903137	0.00662738	0.0604622	0.0504326	0.00231121	0.0010504	0.000326067	0.00757571	0.00543617	0.00593573		0.0014282	0.00020256	0.000825568		0.00307081	8.14159e-05	0.0139078	0.00964168	0.0083875	0.00265692	0.000256827	0.0153628	0.00051372	0.00276037			0.00282096
shared	K01491	zntA; Zn2+/Cd2+-exporting ATPase [EC:7.2.2.12 7.2.2.21]	0.00391462	0.0131455	0.0021455	0.0157067	0.0105854	0.00290456	0.0077224	0.00818083	0.0073225	0.0147319	0.00642902	0.0043728	0.00821732	0.0102734	0.00225227	0.00432718	0.0409392	0.00384406	0.0173758	0.0413354	0.000511091	0.0288346	0.0294593	0.0114099	0.00126516	0.00176636	0.00413067	0.00110093	0.00534103	0.00145877	0.00401505	0.00626247	0.000946853	0.00227836	0.00768044	0.0122228	0.0477583	0.0280568	0.0108827	0.00249693	0.00866184	0.0139717		0.000683669	0.00104379
shared	K01534	PDC, pdc; pyruvate decarboxylase [EC:4.1.1.1]	0.340655	0.206389	0.0920851	0.0853442	0.00312495	0.0940046	0.0077293	0.000741094	0.00138224	0.00201426	0.00458592	0.00883813	0.00147704	0.000471938	0.0010487	0.00021581	0.000354572	0.00193088	0.0126585	0.00194255				0.000307001								0.0104205				0.000275413				9.84263e-05	8.48738e-05		2.14889e-05	0.00338393			0.000598166
shared	K01568	rbcL, cbbL; ribulose-bisphosphate carboxylase large chain [EC:4.1.1.39]		6.76117e-05		0.000402086	0.000522716	0.000102162	0.000220002	0.000291056		7.59368e-05		5.45523e-06			7.71727e-05		0.000482594	2.32319e-05	2.2811e-05	0.000221849		7.37762e-05	0.000231203	0.000261985	0.00178147	0.000175262	0.00104067	0.000342013	0.0250207		0.000322367				0.000648447	0.000181726	0.000491415	0.000299278	0.000107431	0.000536319	0.00036508	0.000673972	0.000285977		2.3036e-05	0.000513323	0.00557896
shared	K01601	rbcS, cbbS; ribulose-bisphosphate carboxylase small chain [EC:4.1.1.39]																					0.0177725	0.0047394	0.0152898	0.00983642	0.0119819	0.00863869	0.026076	0.0262971	0.0132921	0.0053668	0.0381909	0.0225644	0.106249	0.0450712	0.308637	0.24632	0.0128925	0.0116245	0.0279693	0.00339041	0.027827	0.00953125	0.0115093	0.0307656	0.0163768	0.177854	0.0258155
shared	K01602	phr, PHR1; deoxyribodipyrimidine photo-lyase [EC:4.1.99.3]	0.00138512	0.00027232					0.000382639												0.000244664		0.00158381	0.0027197	0.00121795	0.00262064	0.0631731	0.0115105	0.00383133	0.00309875	0.00410011	0.000644598	0.00232617	0.00808183	0.004233	0.0044674	0.143283	0.000716865	0.0130684	0.00415282	0.0121568	0.00479895	0.00150265	0.0176806	0.00345974	0.00360086	0.00179931	0.00495964
shared	K01669	CBS; cystathionine beta-synthase [EC:4.2.1.22]	0.00429742	0.00915581	0.00360793	0.000471257	0.000210147	0.00152331	0.000404199	0.000110153	1.4088e-05	0.00326882	0.000254687	1.46397e-05	0.00165673	4.89144e-05	0.000344371	0.000244272	0.000616873	0.000341673	0.000626332	0.00111404	0.000302059	0.000284217	0.000939231	0.00342407	0.00227354	0.000708527	4.02224e-05	0.00218522	0.00116118	3.66898e-05	0.000974506		0.000272076	0.000426054			0.00290363	0.00256383	0.00140368	0.00117649	0.000102983	4.24128e-05	2.88845e-05	3.18874e-05	9.75294e-06	0.00566114	0.000431304
shared	K01697	hemB, ALAD; porphobilinogen synthase [EC:4.2.1.24]							0.000207135		2.93058e-05						0.000968101				2.91673e-05			0.00125356	0.00156249	0.000359788	0.000517706	0.000246664	2.31803e-06	9.71884e-05	0.000265348			0.00114257	0.00265656	0.00190486	0.000489096		0.000258399		0.000129435	0.000175426				0.000479691	0.00222926
shared	K01698	crt; enoyl-CoA hydratase [EC:4.2.1.17]	0.0661583	0.0354198	0.00919449	0.0442862	0.137152	0.080225	0.0150447	0.0221105	0.576618	0.132639	0.773638	0.0189515	0.435762	0.00469527	0.018572	0.00394885	0.00795136	0.0139468	0.0129423	0.0103363	0.0114095	0.0586978	0.0682574	0.00675072	0.0110062	0.0112523	0.00596144	0.0318763	0.00197558	0.00156143	0.00526283	0.00805485	0.0177058	0.0183335	0.0377173	0.00336596	0.0169357	0.00808008	0.0024235	0.00180012	0.00750295	0.0179378	0.00944784	0.0149838	0.0230572	0.00010356	0.00326809
shared	K01715	galM, GALM; aldose 1-epimerase [EC:5.1.3.3]	0.00023099	0.00266953	3.93683e-05				0.00113683	2.8711e-05	1.98593e-06	0.012558		0.000487526	7.84002e-05	3.40516e-06	0.00194908	2.93612e-06		0.000134189	0.000372779	0.000155622	0.00253509	0.00272132	0.00134619	0.000706461	0.000450669	0.000336968	0.000274957	0.000191849	0.000452022		0.000705385	7.28944e-05	7.01014e-05		0.000345537	0.000282584	0.000311382	0.000131473	0.000316823	0.000411404	0.000205239	0.00102509	0.00160717	0.00668023	0.0155115	0.0270519	0.000604399
shared	K01785	wecB; UDP-N-acetylglucosamine 2-epimerase (non-hydrolysing) [EC:5.1.3.14]							4.68782e-05		1.83926e-06										0.000105922	0.00019195		0.000334749	0.00068189	5.75322e-05	0.000530736	0.000749495	0.000297205	7.30755e-05	0.000126768	6.33558e-05	0.000126664	1.18577e-05			0.00759179	0.0103326	0.000737558	0.000562885	0.000361562	0.000614816	0.00615571	0.000220571
shared	K01791	E5.1.3.15; glucose-6-phosphate 1-epimerase [EC:5.1.3.15]	2.67569e-05	0.000146997	9.7103e-05		0.000167882	0.000153005	0.000215607	0.00209196	6.8951e-05	0.000500171	0.00172091	0.00186658	0.000489465	0.00298126	1.86736e-05	7.6231e-05		0.00321604	0.000129749	0.00070972	0.00118348	0.00124034	0.00079687	0.00159965	0.0013073	0.000798127	0.00132857	4.93973e-05	0.00644427	0.00159793	0.00181817	0.000562954	0.00435697	0.00376473	0.00143953	0.00210179	0.00407462	0.0017213	0.00136402	0.00137434	0.00369473	0.000185331		0.000203026
shared	K01792	EARS, gltX; glutamyl-tRNA synthetase [EC:6.1.1.17]	0.00417527	0.00487537	0.00367169	0.0122814	0.003682	0.0456428	0.0030768	0.0063068	0.00776397	0.000994375	0.000272189	0.00189022	0.00723213	0.00139194	0.00207222	0.000576623	0.00761568	0.00199095	0.00380617	0.00931809	0.00055297	0.00121717	0.00176053	0.000791414	0.00150086	0.00587071	1.41817e-05	0.00251432	0.00217951	0.000194541	0.000868806	0.000125129		0.00290934	0.00120507	8.65628e-06	0.0090779	0.00133698	0.00198931	0.00193698	0.000717076	5.89306e-06		0.00240348
shared	K01885	FARSA, pheS; phenylalanyl-tRNA synthetase alpha chain [EC:6.1.1.20]	0.144155	1.01705	0.538388	0.417677	0.158808	0.426043	0.292866	0.0200153	0.00498594	0.0107284	0.0351802	0.217184	0.014562	0.0099505	0.0127402	0.0179353	0.159219	0.0416582	0.187741	0.0693257	0.00951483	0.470786	0.26268	0.0306573	0.0284964	0.03623	0.00790868	0.0109209	0.0150082	0.0312085	0.0219312	0.00606169	0.0189818	0.0113175	0.00937273	0.00678891	0.0181952	0.0437519	0.0118427	0.0105649	0.0370135	0.872053	0.00264734	0.00306643	0.00706483	0.000182664	0.0069083
shared	K01889	PFAS, purL; phosphoribosylformylglycinamidine synthase [EC:6.3.5.3]	0.00994261	0.0206994	0.00340552	0.00198389	0.0187159	0.0299551	0.0194147	0.0153594	0.0177107	0.0119672	0.0331584	0.252846	0.0243793	0.0125322	0.0111285	0.00174651	0.00289844	0.0104299	0.0340432	0.0522384	0.0014013	0.0106269	0.00956389	0.00583504	0.00570426	0.00410448	0.000844097	0.000920877	0.0039516	0.000338104	0.00246664	0.0228311	0.015161	0.00424529	0.00230746	0.000983776	0.00354946	0.00315285	0.00264066	0.00403498	0.000743068	0.000361576	0.000208007	0.0108328	0.000680763	0.000518944
shared	K01952	asnB, ASNS; asparagine synthase (glutamine-hydrolysing) [EC:6.3.5.4]	0.040767	0.0817114	0.0148796	0.0833149	0.287391	0.904626	0.0529769	0.0310727	0.00566024	0.0194145	0.108118	0.0651148	0.0216368	0.0105102	0.00864073	0.196756	0.32758	0.0382807	0.0916249	0.0169506	0.0394335	0.0462324	0.0632835	1.00611	1.91227	2.10635	2.94515	1.88799	1.20551	3.86327	1.3181	0.0973499	0.0623042	0.0433097	0.350821	1.68233	0.236596	0.851538	1.30361	1.26372	0.96301	1.93383	0.00879984	0.140298	0.00045754	0.00221823	0.00393351
shared	K01953	E6.4.1.4B; 3-methylcrotonyl-CoA carboxylase beta subunit [EC:6.4.1.4]	0.0383832	0.185671	0.0563739	0.0167274	0.0404782	0.122216	0.0400396	0.0103591	0.126	0.0217044	0.0260755	0.0167344	0.0407851	0.00809734	0.0124329	0.0310527	0.0470861	0.0130135	0.048364	0.0394893	0.00403692	0.0153594	0.010155	0.152459	0.345839	0.352664	0.415372	0.362846	0.223625	0.572157	0.20292	0.0635414	0.0355691	0.0203191	0.0670411	0.225919	0.0510751	0.153338	0.223517	0.242736	0.145532	0.258856	0.271536	0.184545	0.115994	0.0132653	0.0573866
shared	K01969	ABC.MR; putative ABC transport system ATP-binding protein	0.0366707	0.0463209	0.0236889	1.0305	0.000375421	2.51257	0.0164465	0.0227737	0.000452412	0.0366643	0.0325591	0.0290302	0.00670835	0.00563818	0.000855597	0.00347033	4.71407e-05	0.000978484	0.0134237	0.00830365	0.012335	0.0363822	0.0423218	0.00658264	0.00308561	0.000646688	0.00906881	0.00525169	0.00438005	0.00380582	0.0030474	0.0106208	0.00858519	0.00758365	0.00317671	0.00614878	0.00675491	0.00318382	0.00422766	0.0046493	0.00118353	0.00197304	0.000176367	0.00536623	0.00106611
shared	K02021	ABC.SN.A; NitT/TauT family transport system ATP-binding protein	0.0252748	0.00794032	0.00709709	0.00519178	0.000671028	0.000210669	0.000797407	0.0010913	0.119649	0.011452	0.263816	0.112321	0.00137689	0.00132113	0.0153694	0.000140116	0.000496703	0.000486609	0.000425535	0.000525687		4.80113e-05	0.000195623		0.00202841	0.000304709	7.2467e-05	0.000492613	0.00145973	0.00014081	0.00586012	0.000268237	0.000878584	0.000859841	0.000450057	0.00109192	0.000300509	0.000410336	0.000117324	0.0021765	0.00085798	0.000288551
shared	K02049	ABC.SN.S; NitT/TauT family transport system substrate-binding protein							9.64077e-05		6.76552e-06										8.2919e-05	0.000157782							5.41309e-05			0.000127692		0.0101212	0.00158969								4.35311e-05	0.000142822					0.000161625
shared	K02051	ABC.SS.P; simple sugar transport system permease protein	0.0237016	0.00370756	0.00109424	0.122482	0.00481837	0.0701799	0.0317955	0.025803	0.000216247	0.00458464	0.103798	0.217939	0.169092	0.0076637	0.0381089	0.0208966	0.00308084	0.0400221	0.00553902	0.0151564	0.0216493	0.0415772	0.0510203	0.0958814	0.0411598	0.0403288	0.129562	0.0244434	0.0200756	0.112359	0.0657066	0.0584471	0.0508928	0.112107	0.0595709	0.0324623	0.166115	0.129356	0.0610955	0.0351529	0.102005	0.111231	0.000928407	0.00534046	0.00538447	0.000165484	0.000231542
shared	K02057	apcA; allophycocyanin alpha subunit	0.000133618	4.00174e-05	0.00112681				1.34111e-06	7.64544e-05	2.57929e-07		1.00919e-05	0.000280326				1.49699e-05		5.49288e-06	1.03372e-05	2.72149e-05	0.000253728	6.98142e-05		0.000483291	0.00101898	0.000356726	0.00095919			1.29814e-06		0.00036898	0.00166334	0.00230664	0.00132321		0.000521073	0.000195502	8.46287e-05	0.000846632	0.000357011		1.48817e-05	4.73838e-05	0.000235561	0.000272312
shared	K02092	apcB; allophycocyanin beta subunit																						0.00682953	0.0024377	0.00841829	0.00191208	0.000884716	0.000158397	0.00317948	0.00213295	6.33849e-05	0.00101451	0.0461848	0.060599	0.00400389	0.107959	0.000495322	0.00505972	0.00226076	0.000389504	0.00354734	0.000958137	0.0109913	0.00642509	0.00746291	0.0123648	0.0182491	0.0235656
shared	K02093	ATPF1B, atpD; F-type H+/Na+-transporting ATPase subunit beta [EC:7.1.2.2 7.2.2.1]	2.45894e-05	0.000217668			0.000722714			0.0012346		0.000120664			0.00742257	0.000798062			0.000163487			3.76759e-06			0.000430695	0.000540886		0.000304112	3.9771e-05		0.000288267		0.000519451		0.000873175		0.00929485					0.00024387			0.00321717	0.00534763	0.00332214	0.00645174	0.00882824
shared	K02112	ATPVB, ntpB, atpB; V/A-type H+/Na+-transporting ATPase subunit B	0.0807206	0.259536	0.171959	0.106089	0.0999002	0.243605	0.226657	0.450646	0.0446576	0.0835988	0.771145	1.11581	0.187044	0.15771	0.095442	0.0640622	0.117749	0.283576	0.431339	0.337458	0.672387	1.56293	1.34926	0.456394	0.365893	0.292134	0.446053	0.496263	1.06984	0.142303	0.477033	2.17863	1.10861	1.08206	0.756848	0.472607	0.359292	0.257832	0.508253	0.58017	0.471072	0.50417	0.0728145	0.343696	0.27997	0.113518	0.0821805
shared	K02118	ATPeF1B, ATP5B, ATP2; F-type H+-transporting ATPase subunit beta [EC:7.1.2.2]																					0.00991479	0.00433716	0.0043281	0.0193959	0.00742186	0.00834154	0.022656	0.00954742	0.0052087	0.0051344	0.00444592	0.0460604	0.0340818	0.123708	0.0030296	0.014052	0.0490828	0.0432011	0.0237499	0.0140572	0.0326822	0.0419648				0.00110556
shared	K02133	ccmE; cytochrome c-type biogenesis protein CcmE	0.00360281	0.00576651	0.0186377	0.00294964	0.063999	0.0132566	0.0180934	0.0471242	0.17823	0.0157649	0.109177	0.133828	0.0521341	0.00929793	0.00294436	0.00105648	0.0248997	0.0350009	0.176569	0.0113766	0.0494884	0.0699269	0.0763649	0.0749483	0.0574936	0.0246632	0.0721841	0.0395671	0.089598	0.0119082	0.112905	0.249172	0.0851748	0.126956	0.162643	0.0285802	0.116986	0.079101	0.0727597	0.0397117	0.0422187	0.0695345	0.028973	0.0562103	0.0485661	0.0710271	0.248716
shared	K02197	cobN; cobaltochelatase CobN [EC:6.6.1.2]	0.0205571	0.0107215	0.00826238	0.254939	0.0245274	0.00366377	0.00469091	0.0153194	8.95143e-05	0.0460859	0.000242607	0.00154513	0.0533098	0.0135961	0.00733491	0.00370684	0.204896	0.0193118	0.00424583	0.00312926	0.0515793	0.0664558	0.038379	0.00143259	0.00468527	0.00181091	0.000111584		0.00317734		0.00035618		0.000116616	0.0040077		6.58814e-05	0.00034678		0.00011106				0.00308434	0.0315144	0.010986	0.000970467
shared	K02230	cpcA; phycocyanin alpha chain		3.9989e-05			9.26195e-06	1.87448e-05	2.4969e-05	0.000124765				7.85095e-06			4.31939e-06			5.51822e-05	2.39757e-05	2.13443e-05		0.000164771	9.00377e-05			0.000243915		0.000342365	6.36579e-05	0.000428378					3.35358e-06	5.12238e-05	0.000570963	0.000348653		0.00022548	1.33691e-05	0.000610533	0.000353493	0.000877188		0.000117859
shared	K02284	cpcB; phycocyanin beta chain			0.0089771		0.000442228			0.00915247				0.000391276		0.00292045				0.00531115	0.00955369	0.0162842	0.000495342	0.0111207	0.0112846	0.000503353	0.00152648	0.0060349	1.30454e-05	0.00364594	0.00220039	5.22694e-05	0.003032	0.0108306		0.0159924	0.243663		0.000231714	0.00157113	0.00174186	0.00281349	0.000224722	0.00155496	0.0359917	0.0317319	0.00426481	0.0197691	0.00325468
shared	K02285	dnaG; DNA primase [EC:2.7.7.101]	0.000300626	0.00181329			0.00075807			0.00691115		0.025293			0.0710361						3.96954e-05	7.54142e-05	0.00158794	0.00109645	0.00168071	0.00154327	0.00533224	0.000397158	8.39154e-05	0.000459095	0.000404385	0.000238753	8.24909e-05	0.00362364	0.00268833	0.00126873	0.0366288	5.67324e-05	0.00194294	0.000974456	0.00161128	0.00227689	0.000239803	0.000212056	0.00715131	0.00813742	0.00613034	0.010416	0.00542366
shared	K02316	POLA2; DNA polymerase alpha subunit B																					0.00736683	0.00436869	0.00719999	0.0369673	0.0109045	0.0152718	0.0384299	0.0142611	0.0310999	0.0461705	0.01499	0.0979501	0.0288105	0.0362435	0.0409295	0.00565488	0.1119	0.0912594	0.0275926	0.0385133	0.0607903	0.0119667	3.63857e-05	8.67878e-05		0.000194174
shared	K02321	fliN; flagellar motor switch protein FliN	0.000134889	1.04852e-05			0.000154806		1.78267e-06	7.11289e-06	7.92986e-07	0.000298596	8.91544e-05	5.63708e-05				9.84348e-05		8.56551e-06	2.90759e-06		0.000881947	7.85862e-05		0.000115008	0.000135799	1.29256e-05		8.50095e-05	6.34573e-05	2.35443e-06	0.000199393	8.88569e-05	0.00161958		0.00014076	0.000381783	0.00036346	0.00013262	9.10702e-05	0.000160905	4.58638e-06		2.20856e-05	0.000318898	0.000171432	9.62095e-05	0.000234535
shared	K02417	paaE; ring-1,2-phenylacetyl-CoA epoxidase subunit PaaE	0.00575231	0.014405	0.0125267		0.00235492		0.00785325	0.000966757	0.000614702	0.00631141	0.00422658	0.00159925		0.00313465	0.000978705	0.023757		0.00327997	0.00985513	0.0217275				0.0011698	0.000814209		2.56191e-05		0.000200925	0.00140209	0.00110683	0.000448045				0.000212157	0.00287504	0.00297271		0.00158003	0.00199076	0.0017493	6.1554e-06	8.92632e-05	1.53096e-05
shared	K02613	petE; plastocyanin	0.00412531	0.0130623	0.00414212	0.000187782	0.000992367		0.00130287	0.000629444	4.92275e-05	0.00483667	0.00790852	0.00285411		0.000437931	0.00457903	0.00133792		0.000206201	0.00117444	0.00172143		0.000375596	6.23018e-05	0.000140835		0.000586791		0.000219259	0.000748303			0.00358839	0.00063097					0.000242695	0.000165533	8.11008e-05
shared	K02638	psaB; photosystem I P700 chlorophyll a apoprotein A2	0.00239038	0.00092078	0.000585158	0.00227431	0.0148058	0.00673286	0.00431144	0.0240888	0.000188792	0.0174402		0.0147093	0.00141315	0.0552152	0.0115789	0.00118553		0.00856572	0.00970217	0.0114166					0.000236392			3.92334e-05		3.40791e-05					0.0360465	4.59412e-05	0.000323112						0.00163312	0.00555504	0.0043172	0.000698686	0.000688366
shared	K02690	psbB; photosystem II CP47 chlorophyll apoprotein																					4.40567e-05	0.000168644	4.54639e-05	0.000145581	0.000381409	9.44822e-05		4.43679e-05	7.9809e-05	3.04971e-05	0.00022316	0.000196494	0.0027097	0.0160856	0.000332152				0.000187881	0.000109902		0.000568857	9.2591e-05	0.000450642	0.000812666	0.000513995	0.00251231
shared	K02704	psbC; photosystem II CP43 chlorophyll apoprotein	0.00677125	0.00501832	0.00567614									0.0616557	0.475103			0.00104978						0.000440089	0.00221932	0.00542359	0.00636462	0.00124131	0.00199582	0.00220409	0.00217404	9.74791e-05	0.00121713	0.00113209	0.00559146	0.130915	0.0270614	5.71535e-05	0.00225101	0.00412484	0.0011434	0.000565448	0.00116992	0.00169679	0.00442591	0.0150222	0.00763275	0.00174381	0.00431154
shared	K02705	PSMA1; 20S proteasome subunit alpha 6 [EC:3.4.25.1]																					0.0152715	0.01372	0.00538011	0.00299384	0.00717567	0.00101215	6.00757e-05	0.00103983	0.00226219	0.000873111	0.00361625	0.00995746	0.0228086	0.134809	0.0459522	0.00612184	0.00437883	0.00297024	0.0127661	0.0023853	0.000864961	0.0014676	0.001986	0.00348671	0.00195456	0.00358285	0.00410091
shared	K02725	RP-L7, MRPL12, rplL; large subunit ribosomal protein L7/L12	5.24054e-05	2.88911e-05			0.00160188	0.00158686	7.37752e-05		3.71076e-07					0.00021765	0.00805076							0.000207623	0.00051024	0.000741394	0.000564951	0.000313512	0.00736513			0.0115388		0.000469304	0.000244737			0.00884257	5.938e-05	0.000270407	0.000146191	1.69093e-05	0.000516264	0.000179896	0.0165807	0.0104481	0.00113741	0.00308909
shared	K02935	RP-S10, MRPS10, rpsJ; small subunit ribosomal protein S10	0.0218894	0.0716981	0.0508143	0.00285708	0.0745337	0.0635427	0.51434	0.127563	0.0475418	0.0960392	0.254335	0.14539	0.252233	0.120436	0.293804	0.0130961	0.0941494	0.45003	0.52866	0.466777	0.00945824	0.0189785	0.0213393	0.0242922	0.0453827	0.0168828	0.00754707	0.0115828	0.10643	0.00656195	0.0738607	0.0479932	0.18797	0.14587	0.67689	0.0756939	0.0211564	0.0348605	0.0246069	0.0272369	0.291364	0.14958	0.122112	0.28389	0.0701654	0.0518519	0.016827
shared	K02946	RP-S16e, RPS16; small subunit ribosomal protein S16e	0.288163	0.444659	0.0669378	0.179047	0.282105	0.266601	0.609928	0.144927	0.236711	0.051657	1.34896	1.07566	1.03002	0.0672517	0.495802	0.0252583	0.0160154	0.147805	0.375188	0.796168	0.0796918	0.180961	0.184486	0.0426781	0.0311438	0.0586972	0.0611492	0.0681611	0.108262	0.0313436	0.0234045	0.263323	0.125543	0.818876	0.207791	0.0298625	0.0197217	0.030497	0.0684138	0.100813	0.104455	0.111117	0.00459264	0.0498084	0.0188939	0.0581214	0.00198524
shared	K02960	RP-S7, MRPS7, rpsG; small subunit ribosomal protein S7			0.00126286	0.000604684	0.000634342	0.000769865			8.93735e-07								0.000284793	9.65805e-06																	0.0156042
shared	K02992	RP-S8, rpsH; small subunit ribosomal protein S8	1.03558	1.28154	1.08287	0.191134	0.260263	0.249859	1.13165	0.517401	0.308286	0.348398	0.323898	0.520463	0.232755	0.0602636	0.741946	0.0175348	0.0431371	0.422193	0.428358	0.824557	0.038298	0.327015	0.0751074	0.0863489	0.171608	0.0676154	1.38627	0.0784634	0.159959	0.0356522	0.131449	0.146547	0.241158	0.309977	0.477994	1.36718	0.120363	0.0746227	0.0588028	0.103714	0.104807	0.098479	0.0104501	0.015972	0.00492451	0.0170146	0.0133105
shared	K02994	RPB2, POLR2B; DNA-directed RNA polymerase II subunit RPB2 [EC:2.7.7.6]	0.319283	0.414421	0.423055	0.0215836	0.107449	0.120458	0.909675	0.248815	0.0822434	0.0978092	0.439138	0.210104	0.298913	0.445559	1.26444	0.0110694	0.00788876	0.55983	0.391459	0.872033	0.0418925	0.13727	0.14991	0.307765	0.0984329	0.15373	0.0309264	0.106407	0.191743	0.0249784	0.0528887	0.350809	0.174011	0.0429943	0.516496	0.0581406	0.178933	0.0893241	0.0796574	0.120671	0.252402	0.620552	0.00316223	0.0476172	0.036814	0.0178575	0.000658128
shared	K03010	EIF4A; translation initiation factor 4A	5.33721e-05	4.17179e-05	0.000154572	6.64517e-05	0.0229713	0.00141984	0.00152623	0.00417202	0.00011872	0.00512646	0.00146273	0.00478609	0.0159745	0.00161202	0.00010798	0.000537857	0.00218714	0.000728221	0.000907649	0.000995296	0.00377106	0.00814896	0.012259	0.00978523	0.0128253	0.0119748	0.00622762	0.0127482	0.0208557	0.0064427	0.0146267	0.0121041	0.577723	0.209138	0.0644845	0.0036856	0.075521	0.0443658	0.0346439	0.0138774	0.0108034	0.0107743	0.00637321	0.00466758	0.0160322	0.00840322	0.0194914
shared	K03257	PRDX2_4, ahpC; peroxiredoxin 2/4 [EC:1.11.1.24]	1.84383e-05	0.0064681	0.0131779		1.10789		0.00119049	0.148716	0.00055487	0.00169911	0.000587903	0.240156	0.24406		0.000487839	0.0178956	0.0182007	0.012388	0.0021176	0.0172218	0.0620182	0.0611999	0.0649798	0.0395545	0.0536763	0.0731871	0.0315123	0.0521102	0.0695418	0.268378	0.0967174	0.00927842	0.0664187	0.0792987	0.459691	0.784964	0.124403	0.0773388	0.0615904	0.0320082	0.0964163	0.15368	0.0346799	0.00478843	0.0113651	0.528361	0.0237626
shared	K03386	cheB; two-component system, chemotaxis family, protein-glutamate methylesterase/glutaminase [EC:3.1.1.61 3.5.1.44]	0.11077	0.44921	0.325765	0.0234089	1.23037	0.316278	1.28897	1.09095	0.0550363	0.627907	0.45835	2.23617	0.674593	0.180582	1.06091	0.0268681	0.152083	0.196556	0.681743	0.568209	1.04155	0.781507	0.557527	0.240955	0.205845	0.251073	1.01934	0.242834	0.321051	1.07013	0.591939	1.48633	1.20654	1.44129	0.344795	0.791011	0.128316	0.238405	0.248329	0.257402	0.712958	0.668649	0.108507	0.384707	0.22512	0.121833	0.153662
shared	K03412	trkA, ktrA, ktrC; trk/ktr system potassium uptake protein	0.000654661	0.000712074	7.08299e-05	0.00109196	0.0130579	0.000368591	0.000257317	0.0011338	9.65394e-06	0.000111894	0.01766	0.00435879	0.00204084	0.00449838	9.63091e-05	9.2379e-05	2.16861e-05	0.00518061	0.000334827	0.000960031	0.000607108	0.00673691	0.00545027	0.00147129	0.000111162	0.0053249	0.00680963	0.00288436	0.00117441	0.000540636	0.00137834	0.00421325	0.00904098	0.00312126	0.00506088	0.00786007	0.000529225	0.00189052	0.00350038	0.00268055	0.00353122	0.00882303
shared	K03499	hupB; DNA-binding protein HU-beta	0.00418523	0.00994456	0.00725325	0.000608888	0.0522922	0.0556239	0.0103422	0.0199653	0.30074	0.0157549	0.000734446	0.00854108	0.0135565	0.00103549	0.000315531	0.0104438	0.00098334	0.00901089	0.0132974	0.0150295	0.00246867	0.00662578	0.0288798	0.0140469	0.00708721	0.0040215	0.0010992	0.00151579	0.00243472	0.000420373	0.00265892	0.00324761	0.00202415	0.00629467	0.00110657	0.0017672	0.0124435	0.00863619	0.000766645	0.00153528	0.00202426	0.00281688
shared	K03530	recC; exodeoxyribonuclease V gamma subunit [EC:3.1.11.5]	0.0843236	0.202283	0.22677	0.185229	0.70392	0.0477737	0.537865	0.132663	0.0590949	0.172141	0.693389	0.858902	0.11732	0.157956	0.763402	0.0542241	0.0351501	0.441273	0.253269	0.809675	0.405622	0.376319	0.4306	0.989167	0.423514	0.531289	1.45554	0.738788	0.607455	0.624521	0.584839	0.321939	0.6741	0.564301	2.80189	1.64553	1.26966	0.85094	0.881765	0.93975	1.73833	1.84125	0.0159132	0.276318	0.120992	0.0655217	0.0511393
shared	K03583	ftsW, spoVE; cell division protein FtsW	0.000177609	0.00263581	0.000238235	0.0101394	0.0342372	0.111828	0.00109295	0.00115919	0.000419755	0.00021217	0.0118355	0.002978	0.000713487	0.00170383	0.000441443	0.02429	0.0403857	0.00418425	0.00552702	0.00031402	0.000995577	0.00122362	0.00190403	0.122652	0.23529	0.259511	0.363086	0.230004	0.144405	0.476464	0.160734	0.00509909	0.00366612	0.00143627	0.0391088	0.207053	0.0277311	0.10395	0.154531	0.146491	0.118445	0.236899
shared	K03588	xseA; exodeoxyribonuclease VII large subunit [EC:3.1.11.6]			6.98893e-05					0.000123267	1.13146e-06						1.18449e-05						3.26424e-05	1.75211e-05	2.34794e-05			0.000153935		3.27069e-05						0.000436101	0.000378994	2.61396e-05			7.87983e-05	0.000100781		0.000445124	2.44057e-05	0.00052892		8.58089e-05
shared	K03601	proQ; ProP effector	0.000977251	0.00152586	0.000560017	0.00282423	0.000279689		0.00136527	0.00337476	0.0223691	0.00108879			0.000715633			4.53805e-05		0.0106625	0.00304339	0.00319093		0.0153803	0.00359629	0.00111062	0.00261387	0.00279339	0.000802063		0.000954166	0.000759807			0.00184595	0.000616925	0.000649127		0.00049446	0.000985318		0.000701616	0.0001972	0.00183123		0.000102378
shared	K03607	tolA; colicin import membrane protein	0.00187195	0.00697036	0.00211137	0.00331456	9.68841e-05	0.0113746	0.00122023	0.000423459	0.000108427	0.000361072		8.63199e-05		6.76381e-05	0.000748379			0.000705815	0.00194597	0.00222405	0.000852021	4.67149e-05	0.000187787	0.000687441		0.00190638	0.00781045	0.0137813	0.0131395	0.00948607	0.00144235	0.000717745	0.00251057	0.000928763	0.00726996	0.00029971	0.0120176	0.0077009	0.0116161	0.0253907	0.00499153	0.00277792
shared	K03646	trxA; thioredoxin 1																						7.23693e-05	7.17083e-05	0.00396722	0.00186555	0.001684	0.00153605	0.000915128	0.000602832	0.000340069	0.00132324	7.64005e-05	0.000332605	0.000242225	0.000263583	6.15957e-06	0.00281683	0.00257386	0.00166053	0.000930648		0.000158494	7.85284e-06
shared	K03671	clpC; ATP-dependent Clp protease ATP-binding subunit ClpC	0.0171572	0.0290022	0.142512	0.0918106	0.0811159	0.0385886	0.16468	0.117369	0.0357989	0.190993	0.0920135	0.12429	0.0880571	1.47989	0.460208	0.0455357	0.146635	0.542466	0.191065	0.158306	0.0162452	0.0187092	0.0196598	0.0234053	0.0254683	0.00969953	0.0155146	0.0484566	0.0664187	0.0182351	0.0197755	0.0386806	0.0319331	0.0225482	0.236952	0.0432289	0.0308543	0.0425362	0.0378488	0.0406535	0.0115258	0.0334232	0.0310591	0.0712271	0.0534564	0.0463291	0.0382813
shared	K03696	PPIA; peptidyl-prolyl cis-trans isomerase A (cyclophilin A) [EC:5.2.1.8]	0.00217846	0.000458572	0.00279351	0.000277875	0.00242027	0.00932764	0.00648211	0.0448038	0.000269487	0.0099901	0.0196922	0.000774834	0.000746633	0.00160025	0.0211553	0.000861767	0.0058752	0.00392457	0.00113841	0.00334266	0.00308445	0.0153453	0.0124814	0.00477886	0.00487611	0.00307468	0.00673605	0.0138876	0.0614052	0.00427377	0.00222823	0.00595799	0.202595	0.00334024	0.0631329	0.0399111	0.0364475	0.013171	0.0137904	0.000191634	0.0088819	0.0305736	0.00510359	0.00977663	0.00455243	0.00590459	0.00384148
shared	K03767	fldA, nifF, isiB; flavodoxin I	0.00262766	0.0034832	0.0018076	0.00384036	0.193476	0.0056141	0.0171513	0.014839	0.00269792	0.0107392	0.0221499	0.0081727	0.00462958	0.0362392	0.0300219	0.0068234	0.013571	0.0258972	0.0203468	0.0201783	0.00353107	0.00673576	0.00382304	0.00757689	0.000863473	0.00485134	0.000701998	0.00506816	0.00724704	0.00910246	0.00776637	0.00279203	0.0471032	0.0137726	0.0370421	0.478974	0.0099549	0.00452148	0.0105745	0.0074991	0.00514761	0.0074688	0.0213119	0.0154221	0.272084	0.307709	0.0240187
shared	K03839	CES2; carboxylesterase 2 [EC:3.1.1.1 3.1.1.84 3.1.1.56]	0.000166065	0.000345545	0.00011869		3.80829e-05	6.38143e-05	6.43688e-05		1.38746e-05	7.56508e-05	0.000903552	0.000970355		0.000849375		2.25475e-05	0.00161927			1.09715e-05	0.000570928	0.000729001	0.000466737	0.0039568		0.000631544		0.000661081	0.00101399	0.00066947	2.82048e-05		0.00202868		0.243769	0.000633023	0.00168343	0.00205182	0.000652284	0.000344716	2.90166e-05		0.000709765	0.00189224	0.0168784	0.00453057	0.00506073
shared	K03927	glmU; bifunctional UDP-N-acetylglucosamine pyrophosphorylase / glucosamine-1-phosphate N-acetyltransferase [EC:2.7.7.23 2.3.1.157]	0.000116765	6.11201e-05					2.38596e-05	3.07109e-05	4.79366e-06	0.000192811		8.58424e-06		5.43644e-05	3.53628e-05	5.65155e-06			9.41501e-06	9.17991e-05	0.00231818	0.00377008	0.00416622	0.00110956	0.00362163	0.000169527	0.00111909	0.000128061	0.00309284	0.000122325	0.00281116	0.00458212	0.00585759	0.0046554	0.0888394	0.00589319	0.00528921	0.00163154	0.000805344	0.000704656	0.00738902	0.00698464	0.000329179	0.000260053	0.00104683	0.000587296	0.000297342
shared	K04042	dps; starvation-inducible DNA-binding protein	0.00140409	0.00449192	0.0015527	0.000259424	0.000241769		0.00353086	0.00366445	0.000421129	0.0615893	0.00286672	0.00387917	0.00467466	0.00571018	0.00275743	0.00771827	0.000705529	0.0305636	0.00463365	0.00722406	0.00206481	0.00905853	0.0081411	0.019401	0.0206369	0.00839773	0.00874099	0.0471361	0.0124764	0.000860076	0.00896712	0.0071108	0.00492991	0.0281277	0.00651987	0.00304086	0.0121376	0.0106374	0.0346347	0.0129788	0.0262597	0.0133742
shared	K04047	PIAS1; E3 SUMO-protein ligase PIAS1 [EC:2.3.2.-]	0.0172993	0.0180608	0.00497454	0.00794323	0.0158498	0.0134988	0.0180339	0.263504	0.0160499	0.0224649	0.0417906	0.00864758	0.0138007	0.0355237	0.0131493	0.0103451	0.00917699	0.0245307	0.0173615	0.0148376	0.010396	0.0425788	0.0303165	0.0661178	0.0319673	0.0192405	0.0034352	0.0120036	0.0115159	0.00389977	0.00361868	0.000474308	0.00250509	0.000501874	0.0057915	0.00159404	0.132953	0.130592	0.012288	0.013044	0.00472384	0.034213	0.00525637	0.0893736	0.0830527	0.00514116	0.00184425
shared	K04706	glnB; nitrogen regulatory protein P-II 1	0.000134889	1.04852e-05			0.000154806		1.78267e-06	7.11289e-06	7.92986e-07	0.000298596	8.91544e-05	5.63708e-05				9.84348e-05		8.56551e-06	2.90759e-06		0.000881947	7.85862e-05		0.000115008	0.000135799	1.29256e-05		8.50095e-05	6.34573e-05	2.35443e-06	0.000199393	8.88569e-05	0.00161958		0.00014076	0.000381783	0.00036346	0.00013262	9.10702e-05	0.000160905	4.58638e-06		2.20856e-05	0.000318898	0.000171432	9.62095e-05	0.000234535
shared	K04751	E1.1.1.65; pyridoxine 4-dehydrogenase [EC:1.1.1.65]	0.12676	0.0986442	0.133651	0.163992	0.163181	0.15992	0.0759602	0.727684	0.0711445	0.0504622	0.286727	0.439432	0.38138	0.432859	0.0361248	0.0315378	0.0394593	0.388766	0.0714714	0.0971506	0.314585	0.136852	0.246197	0.0508438	0.0414955	0.050191	0.0407757	0.0362196	0.289684	0.0245007	0.0560964	0.0697286	0.0572059	0.794399	0.0726042	0.0285529	0.0406286	0.0220373	0.0413134	0.0335578	0.0655154	0.0679049	0.0241499	0.25969	0.352022	0.142875	0.143998
shared	K05275	cpeA, mpeA; phycoerythrin alpha chain					7.03474e-05		6.55553e-05	0.00108386	8.01346e-06	0.000254063				0.000776115		0.000171066			0.000129765			0.00675912	0.00424871	0.00210071	0.00421705	0.00281575	7.38936e-05	0.00152303	0.00100399	9.71651e-06	0.000258189	0.000749397	0.000991654	0.609421		0.00017287	0.00015963	0.000278479	0.00251129	0.000341085	0.000171062	5.43107e-05		0.00179377		0.0013463
shared	K05376	cpeB, mpeB; phycoerythrin beta chain	0.00350756	0.00192573	0.00370024	2.79022e-05	0.00370353		0.00117014	0.00362401	0.000137945	0.00932405	0.00600094	0.0620538	0.0434723	0.0188208	0.000591376	0.000170059	8.2881e-05	0.0118328	0.000891543	0.000671031	0.00169078	0.0542985	0.0190056	0.00888256	0.00805264	0.0160732	0.0250932	0.0337652	0.00825665	0.0575645	0.0416466	0.0580141	0.215575	0.033275	0.846673	0.00755474	0.0145286	0.00903355	0.0299695	0.0132971	0.0121455	0.00136992	0.00910534	0.0183516	0.0470483	0.0392922	0.00560974
shared	K05377	cpeE; phycoerythrin-associated linker protein	0.0039013	0.0106236	0.0243782		0.00358591	0.00509694	0.00214713	0.0015199	1.49744e-05	0.00588339	0.00560523	0.0201652	0.135912	0.0177898	0.000575633	0.000253102	0.000225015	0.0436227	0.000541418	0.0323753	0.0089958	0.0100785	0.0138941	0.0251343	0.0768419	0.0145784	0.0105197	0.0192247	0.00844956	0.0295815	0.016769	0.0511061	0.237429	0.0171565	2.73563	0.0153408	0.0215099	0.0140402	0.0199679	0.0332559	0.00892643	0.0115473	0.0106407	0.0801126	0.146297	0.20731	0.0402905
shared	K05380	mscK, kefA, aefA; potassium-dependent mechanosensitive channel																					0.000495434	0.00183273	0.000865525	9.53227e-05	0.000182231	0.000108453	0.0262848	0.000265105	0.000180105	8.78107e-06	0.000203034	0.000349288	0.00868776	0.000563452	0.0369825	0.0024147	5.34051e-05	0.00017614	0.000753403	0.000267293	0.000785358	4.30712e-05	0.000510106	0.00258244	0.00179446	0.00250187	0.00375049
shared	K05802	rodA, mrdB; rod shape determining protein RodA	2.77216e-05	6.24363e-05	1.96792e-05	9.84895e-05	0.000296089	0.000120033	0.00116004	0.0010726	3.5771e-05	0.00290845	0.00983216	0.0036751		0.00937254	0.000805185	8.04129e-06	0.000634652	7.73742e-05	0.000823756	0.00121162				0.00691135	0.00111884			0.00594596	0.00159951			0.0010345	0.0852932	0.0110233			0.00714642	0.0031468	0.0023839	0.00462616		0.0283225
shared	K05837	tar; methyl-accepting chemotaxis protein II, aspartate sensor receptor	0.00410395	0.0104562	0.000950798				0.000515461	0.000155407	1.59715e-06	0.000485331	0.00427029	0.00113468		0.00316376	5.64347e-05			0.0132007	0.000382535		3.26424e-05	1.75211e-05	2.34794e-05			0.000153935		3.27069e-05						0.000436101	0.000378994	2.61396e-05			7.87983e-05	0.000100781		0.000445124	2.44057e-05	0.00052892		8.58089e-05
shared	K05875	SQD1, sqdB; UDP-sulfoquinovose synthase [EC:3.13.1.1]	0.00334017	0.0040021	0.00189627	0.0043781	0.00313363	0.0149068	0.00340424	0.00477423	0.0338459	0.00338286		0.000524886		0.00649391	3.57459e-05			0.00253075	1.97268e-05	0.00052707									0.000373034							5.36984e-05				0.000489096	0.000133848	6.45156e-05		0.0149425
shared	K06118	fadE; acyl-CoA dehydrogenase [EC:1.3.99.-]							2.03954e-05					0.000481446		1.11765e-05		6.73469e-06	0.000210828	0.00050517		4.57564e-05	0.00359149	0.00286847	0.0052651	0.030906	0.000437944	0.0188814	0.00435979	0.00364282	0.00323691	7.03827e-05	0.00404023		0.00602743	0.0011032	0.0453573	0.146323	0.0682576	0.0287031	0.010893	0.0112714	0.015383	0.0204871	0.000133042	0.00076285	0.000179957	0.000477007	0.00289152
shared	K06445	K06954; uncharacterized protein	0.0449445	0.0382733	0.00834922	0.0021127	0.0111623	0.0068991	0.00992586	0.0332812	0.0411202	0.0130772	0.00381069	0.0324711	0.0096691	0.0102213	0.0137385	0.00101674	0.0109177	0.0205268	0.0104258	0.0125391	0.0162844	0.0197882	0.0226625	0.0280392	0.0202401	0.00763558	0.0162978	0.014962	0.0340869	0.0103114	0.0191254	0.00422375	0.0246973	0.0106117	0.00973376	0.00515351	0.00412505	0.00372702	0.0085092	0.0206729	0.00502435	0.00448273	0.00532227	0.013729	0.0149655	0.00111213	0.00041891
shared	K06954	K07001; NTE family protein	0.00933333	0.0202844	0.00391804		0.00517883		0.00203628	9.74975e-05		0.00355956	0.00331555	0.00054616	8.8227e-05		0.000360376	0.000518658	0.000973372		0.000645197	0.0010525		0.000390748	0.00108165	9.33834e-05	0.00150742		0.000391694	0.000691491	0.000257006	2.92702e-06		0.000155759	0.00014685		0.000572013	7.8669e-05	0.000416609	0.000386405	0.000760632	0.00134803	0.00111603
shared	K07001	K07025; putative hydrolase of the HAD superfamily	0.021602	0.00715083	0.00139584	4.83853e-05	0.000212878		0.000890943	0.00117276	1.37223e-05	0.013428	0.00147521	0.00468797	0.0039086	0.00236633	2.08443e-05	1.74855e-05	0.000996677	0.00633583	0.000318523	0.00023159	0.000277757	0.00721322	0.0124831	0.00341461	0.0103695	0.0160069	0.00958116	0.0192486	0.0122092	0.0438002	0.0122523	0.00433095	0.00467653	0.000447616	0.00418812	0.00228295	0.00260215	0.00424029	0.0109651	0.0176602	0.0125725	0.00491475	0.0619553	0.00945132	0.0786773	0.00499006	0.0282625
shared	K07025	oprO_P; phosphate-selective porin OprO and OprP																						0.000136143	0.000119779			0.000184279	2.8337e-06	8.67677e-05	7.0378e-05	4.11194e-05					0.00052169		0.000336084	0.000122882			5.03941e-05
shared	K07221	TUBB; tubulin beta	0.116206	0.062129	0.0541378	0.0119837	0.0797194	0.0133796	0.0108646	0.111036	0.0525066	0.0482669	0.0204856	0.0267305	0.0588282	0.0189011	0.0355178	0.00395859	0.0078067	0.0938483	0.00727437	0.0137672	0.314328	0.503372	0.564333	0.104886	0.0732363	0.147504	0.0203986	0.0187449	0.121756	0.00589833	0.0191275	0.0187244	0.0255923	0.0249718	0.00457306	0.0165798	0.0527249	0.0499108	0.0137756	0.016965	0.00864147	0.151735	0.0326656	0.219651	0.11847	0.0186201	0.00631711
shared	K07375	KRT1; type I keratin, acidic	0.00635062	0.0173762	0.0108702	0.00096911	1.69541	0.148295	0.0805022	0.307407	0.00374793	0.319778	0.0189649	0.197319	1.3826	0.194233	0.00366994	0.0640924	0.0601699	0.0711723	0.033063	0.0926805	0.475496	0.38694	0.47331	1.27057	1.03224	0.865977	0.375142	0.844884	0.920784	2.43002	1.2927	1.26977	3.54746	1.04706	6.16139	0.666417	3.17446	1.73093	1.32565	0.847646	1.5414	0.840266	0.527917	0.447269	0.511643	1.108	0.616645
shared	K07604	KRT2; type II keratin, basic	0.00893296	0.0121395	0.0176733	0.0291742	2.03319	0.865445	0.143157	0.0152308	0.0176399	0.174061	0.0433943	0.36659	2.62576	0.0885423	0.149525	0.0743427	1.26841	0.0717953	0.0691539	0.0237326	2.58467	1.01225	0.350231	2.88519	4.60237	6.13835	4.25359	6.842	4.64675	8.81606	6.1186	0.207466	0.163424	0.0838593	1.39547	4.19114	1.31944	3.36728	5.49672	5.03282	1.98862	1.72539	10.4833	3.62978	4.18481	0.919434	1.98036
shared	K07605	LMNB; lamin B	0.0279373	0.0195762	0.0272868	0.244771	5.77052	2.15866	0.156119	0.157605	0.129879	0.222726	0.109899	0.338954	2.5364	0.136556	0.144717	0.0848392	1.84358	0.0737603	0.0828848	0.0397106	3.80754	2.0318	0.805709	7.20008	9.71033	15.84	5.38481	12.3766	8.86614	13.3742	12.1816	0.432882	0.468237	0.371307	3.90858	4.83902	3.32913	9.82406	14.5137	11.0882	3.01704	2.79847	16.3392	11.5445	12.8766	1.54623	7.02378
shared	K07611	RAB1B; Ras-related protein Rab-1B	0.000443081	0.000918654	0.000582169	0.150941	0.483255	1.43507	0.144162	0.00500021	0.0180436	0.0146578		0.0482331	0.00899971	0.0272766	0.0804911	0.153805	0.589021	0.0562949	0.0686008	0.0182439	2.84025	0.476114	0.214402	2.4552	3.94296	4.33949	5.26197	4.54553	2.58201	8.00075	5.38807	0.0426161	0.0382901	0.0188426	0.998419	2.67127	0.929507	2.29468	4.15667	2.81825	1.1502	2.60289	10.0602	3.84102	5.37445	1.34481	2.81856
shared	K07875	RAN; GTP-binding nuclear protein Ran																						0.000143953		0.000706647	5.87056e-05		0.000948688		0.000123033	0.000973878	4.372e-05	0.00418259	0.000459228	0.000824697	0.00299377	0.00409495		0.00126501	5.3669e-05	5.54483e-05	0.000604283	0.000406646	0.103534	0.0328885	0.123962	0.0873422	0.052484
shared	K07936	ccmK; carbon dioxide concentrating mechanism protein CcmK	0.00329606	0.0177598	0.0948114				0.00900747		7.18931e-05		0.0409161						0.00059728	0.000137116			0.293875		0.0137757	0.0273676	0.0223142	0.0315261	0.0461801	0.0262553	0.0804785	0.136299	0.0679371		0.333393		0.154186	0.155545		0.0678231	0.00636238	0.0034629	0.0343969	0.0169565	0.011138	0.158919	0.0848776	0.0949944
shared	K08696	NRBP; nuclear receptor-binding protein		4.26879e-05			0.00816175	0.00113392			1.74164e-06			4.68089e-06			1.77311e-05				9.30671e-06	1.65004e-05	0.00320927	0.00330757	0.00374232	0.00491638	0.0465524	0.0877511	0.0186368	0.00253176	0.00333628	0.0102849	0.0017064	0.182562	0.419058	0.484853	0.806381	0.244713	0.0263662	0.020802	0.00258876	0.00790923	0.00879752	0.00424109	0.00775007	0.0123243	0.0465269	0.0028673
shared	K08875	LHCB1; light-harvesting complex II chlorophyll a/b binding protein 1			7.18229e-05		0.00551627	0.00170139	7.03058e-05	1.5869e-05			0.00265817	0.000438834	0.000856681	2.10967e-05		8.63335e-06		9.24713e-06	8.15026e-06	1.14341e-05	0.0040667	0.000986208	0.000347946	0.00164336	0.00297493	0.00323277	0.000415352	0.00208973	0.0010486	0.00756459	0.00339762	0.000317337		0.00221349	0.00095412	0.000399223	0.000627137	0.00249269	0.00229109	0.00113014	0.000869511		0.00413779	0.0067634	0.00349499	0.00111267	0.00272099
shared	K08912	LHCB2; light-harvesting complex II chlorophyll a/b binding protein 2																						0.000158209	0.0002238		0.000378644		2.34894e-05	0.000596793	9.55644e-05	7.04807e-05				0.000968045	0.00593004	0.00465377				0.000201637	0.000271278	0.000250969	0.000534617	0.00153946	0.000937478
shared	K08913	LHCB4; light-harvesting complex II chlorophyll a/b binding protein 4																						0.000158209	0.0002238		0.000378644		2.34894e-05	0.000596793	9.55644e-05	7.04807e-05				0.000968045	0.00593004	0.00465377				0.000201637	0.000271278	0.000250969	0.000319453	0.000954675	0.000937478
shared	K08915	HSP90B, TRA1; heat shock protein 90kDa beta																						3.55299e-06					3.5227e-05			2.11817e-06					0.000693825	0.00100074						0.000805295	0.000240917	0.0011022		0.000665192	0.00126303
shared	K09487	CCT1, TCP1; T-complex protein 1 subunit alpha			0.0148918				0.0026849		3.6167e-05										0.000407209	0.00114176	0.0298559	0.0272046	0.0169068	0.0410608	0.0100754	0.0168407	0.0110984	0.00687633	0.00573806	0.00155263	0.00474665	0.00770304	0.0319961	0.00937312	0.326711	0.00913536	0.0124899	0.00824258	0.0228833	0.00784302	0.0105094	0.0105365	0.0098839	0.0241543	0.0297913	0.10201	0.0501684
shared	K09493	CCT7; T-complex protein 1 subunit eta	2.98587e-05	9.47388e-05	5.15615e-05				7.79131e-06			1.85638e-05						5.407e-05				1.5966e-05	0.0235637	0.00545696	0.00893533		0.00268415		0.000788893		0.00115256	0.000292563	0.00224541	0.00332379	0.0140439	0.00189829	0.0122843	0.00287693	0.00295116	0.00203352	0.000565087	0.00130096	0.000491938	0.000546222
shared	K09499	TMPRSS13, TMPRSS11; transmembrane protease serine 13		9.89489e-06	0.000128362				1.81677e-05		2.85015e-06		0.00838214	0.0457872							1.32635e-05		0.00814692	0.000548303	0.000917028	0.00351282	0.00172453	0.000680567	0.00151493	0.00120236	0.0052231	0.000223486	0.00134343	0.012288	0.00858924	0.00209151	0.0121163	0.00058701	0.00440296	0.00413746	0.00331664	0.00130415	0.000882309	0.0015589	6.47271e-05	0.00385596	5.4995e-05	0.00436599	0.0401467
shared	K09643	TMPRSS11F; transmembrane protease serine 11F [EC:3.4.21.-]	0.000636573	0.00208225	0.032645					0.000330267	1.45253e-05	0.000988321	1.48792e-05	0.000595378						0.000126359		7.47544e-06	0.181713	0.0066013	0.00794488	0.0505526	0.0413623	0.0144606	0.00604667	0.000401094	0.00126831	0.00316145	0.000642739	2.83787e-05	4.03703e-05	0.00223259	0.0011443	0.0022477	0.00189116	0.00168644	0.000461983	0.000209697	0.00509807	0.00962076
shared	K09752	K09938; uncharacterized protein	0.00061668	0.00201718	0.0316248					0.000319946	1.40714e-05	0.000957436	1.44143e-05	0.000576773						0.00012241		7.24184e-06	0.176034	0.00639501	0.0076966	0.0489728	0.0400697	0.0140087	0.00585771	0.000388559	0.00122868	0.00306266	0.000622654	2.74918e-05	3.91087e-05	0.00216283	0.00110854	0.00217746	0.00183206	0.00163374	0.000447546	0.000203144	0.00493876	0.00932011
shared	K09938	LGALS7; galectin-7	0.000536327	0.00113591	0.00295651		2.17649e-05	0.000677866	0.00226702	0.00167721	0.00028102	0.00749334	0.00166791	0.0362135	0.00334284	0.0395609	0.0021162	1.298e-06	0.000275312	0.00333474	0.00362031	0.0044507	0.000295331	0.000298542	0.000152365	0.00136871	0.00258951	0.000264914	0.000864919	0.000330837	0.000312732	0.000324564	0.000867885	0.000532222	0.000428477	0.00279546	0.000640036	0.000392769		0.00016752	0.00110105	0.000475614	0.000745962
shared	K10092	malK, mtlK, thuK; multiple sugar transport system ATP-binding protein [EC:7.5.2.-]	0.000241423		0.0857945		0.123447		0.00189591	0.00198886	0.123709	0.000109972		0.000202663	0.000934216				0.000310739	0.00350823	0.00248117	0.00363471	0.000833328	0.00147071	0.0054262	0.0189954	0.0196845	0.0199308	0.00955966	0.0126278	0.0115922	0.0961464	0.0296694	0.0030204	0.00966597	0.0199533	0.00709491	0.0185558	0.00908515	0.0185162	0.0222408	0.0133618	0.017651	0.00841607	0.144933	0.117679	0.136396	0.0519516	0.0481896
shared	K10111	E2.6.1.83; LL-diaminopimelate aminotransferase [EC:2.6.1.83]	0.000196744	3.32929e-06	0.000101571	0.000118623	0.000277315			0.000327808	7.79833e-06					2.43558e-05	0.000218306				1.69683e-05		0.000625392	0.00742065	0.0118224	0.0266028	0.0251486	0.00681139	0.0115884	0.00980928	0.0087647	0.00125958	0.00500206	0.0399696	0.0057152	0.0120438	0.024501	0.00750216	0.11065	0.0706488	0.024567	0.0158243	0.0165142	0.0525084	0.00469357	0.0282855	0.00286133	0.0336771	0.00879008
shared	K10206	smoE, mtlE; polyol transport system substrate-binding protein																					2.563e-05	0.000649416	0.0031564	0.000659874		0.00110597		1.92847e-05	0.0341251	0.00025432	7.20596e-05		0.0998922		0.110726		0.00217572	0.0391517		4.75985e-05	0.000829453	0.000517196	0.00394964	0.00273187	0.00102365	0.0122467	0.00577577
shared	K10227	aglE, ggtB; alpha-glucoside transport system substrate-binding protein	0.000108323	0.000207099	0.00324246	0.000292591	0.000160412	9.12339e-05	0.000251904	0.00272124	4.67598e-05	0.000630086	0.00317594	0.0274411	0.00448926	7.0592e-05	0.000374717	7.71574e-05		0.000145391	0.000558833	0.000483382	0.487266	0.0437722	0.130707	0.00185265	0.00388936	0.00473045	0.000162635	0.00399736	0.00371384	0.000587114	0.00628774	0.00504648	0.101542	0.00427445	0.00242209	0.000711626	0.00118693	0.00289337	0.00316718	0.00348698	0.00250538	0.00700624	0.000458393	0.00192731	0.00117995	0.000458716	0.000655613
shared	K10232	MYO15; myosin XV	0.000216757	0.000541333	0.000441512	0.00289519	0.000175794	0.00161357	0.000251415	0.00159587	0.00412294	0.00260233	0.000162523	0.024187	0.090253	0.0017532	0.000623447	7.72613e-06	0.0236033	0.00129597	0.000323309	7.24531e-05	0.0106943	0.00897616	0.00720696	0.0161077	0.0150149	0.0151632	0.0249226	0.00780831	0.0185661	0.00380217	0.00728983	0.0385759	0.0700917	0.0377856	0.0216417	0.011268	0.00856468	0.00952519	0.00459261	0.00445775	0.0252443	0.0333455	0.00108973	0.000942279	0.00291477	0.00109242	0.00181259
shared	K10361	PLEC; plectin			5.2302e-05		7.57683e-05		1.58745e-05	0.000258158	6.0884e-05		0.000240979	3.16901e-05		4.6652e-05	0.000799059	2.80229e-05		6.80193e-05		2.59447e-06	0.000364981	0.00596692	0.000655206	0.000202828	0.00217592	0.00713	0.0113412	0.00176151	0.00191534	0.0139415	0.00375421	0.000204422	0.00311882	0.00076826	4.90799e-07	0.00236018	0.000235104	0.00227194	0.000147886	0.0353781	0.00352956	0.00536527	0.00520772	0.00299702	0.0234096	0.00126446	0.0120495
shared	K10388	frcB; fructose transport system substrate-binding protein			0.000107589		0.00886091	0.00254865	0.000105317	2.37715e-05			0.00398188	0.000657364	0.00128329	3.16024e-05		1.29326e-05		1.3852e-05	1.22089e-05	1.7128e-05	0.00609182	0.00147732	0.000521216	0.00246172	0.00445639	0.00484262	0.000622189	0.00313037	0.00157079	0.0113316	0.00508956	0.000475364		0.00331576	0.00142925	0.000598028	0.000939439	0.003734	0.00343201	0.00169292	0.00130251		0.00627057	0.0101683	0.00525677	0.00172351	0.00416681
shared	K10552	nemA; N-ethylmaleimide reductase [EC:1.-.-.-]	8.4862e-05		2.32463e-05					5.87393e-05		2.78312e-05				6.07084e-05	3.39025e-05		0.00171913				0.000596032	0.00105346	0.00072534	0.0330837	0.0361814	0.0326939	0.0322258	0.00927514	0.0262093	0.0167269	0.00135952	0.00787861	0.00544697	0.0129345	0.00646984	0.0111935	0.0419091	0.0360304	0.0109875	0.014102	0.119205	0.00790787	0.000109721	0.0022641	0.00180427
shared	K10680	GAPDHS; glyceraldehyde-3-phosphate dehydrogenase (phosphorylating), spermatogenic [EC:1.2.1.12]	0.00938272	0.0184379	0.00406138	0.00525886	0.00540095	0.00207054	0.00262573	0.0335002	0.0499231	0.00591079	0.0014123	0.00667254	0.00579929	0.00723088	0.000899631	0.000292142	0.0129415	0.00603231	0.00332284	0.00480791	0.0419206	0.129564	0.0675672	0.000704313	0.000296357	0.0043648	0.00834503	0.000157085	0.00101845	4.48546e-05	0.00130031	0.00157566	0.00177795	0.0116728	0.000857569		0.00128511	0.000720104	0.000580236	0.000938668	0.000246131	0.000187463	0.011946	0.0218845	0.0307694	0.000440971	0.000173832
shared	K10705	CETN2; centrin-2	0.00208179	0.00121756	0.021634		0.652979	0.0349756	0.00355479	0.0061397	0.000324846	0.0284975	0.0286897	0.0035063	0.0045797	0.00832039	0.00488723	0.000413715		0.0106903	0.000789359	0.00612788	0.165069	0.0356543	0.0174667	0.0306675	0.0332191	0.0370962	0.0399116	0.035738	0.0298972	0.122691	0.0421618	0.0155929	0.470041	0.00892915	0.0281207	0.108439	0.0190696	0.0511671	0.0377225	0.029164	0.0488577	0.0141015	0.414634	0.378642	0.268752	0.0520027	0.266387
shared	K10840	ERCC6, CSB, RAD26; DNA excision repair protein ERCC-6																								0.00119255			0.00295801	0.000957945						0.0108304	0.0339737				0.00263157	0.00161003		0.00026211	0.00435614	0.00491268	0.00828855	0.0376261	0.00201464
shared	K10841	mshA; MSHA pilin protein MshA	0.00357188	0.00027765			0.0040993		4.72055e-05	0.000188351	2.09984e-05	0.00790689	0.00236083	0.00149271				0.00260657		0.000226816	7.69937e-05		0.0233541	0.00208098		0.00304544	0.00365849	0.000342272		0.00239068	0.00168036	6.23458e-05	0.00559546	0.00235295	0.0428867		0.00578463	0.0115763	0.00968937	0.00359862	0.00268453	0.00438856	0.000121448		0.00126367	0.00844448	0.00453956	0.0026646	0.00621053
shared	K10924	mshB; MSHA pilin protein MshB	0.0145037	0.135185	0.0812809	0.000277918	0.0122376	0.000472515	0.0197267	0.0388398	0.0416614	0.0210189	0.0199162	0.0289984	0.0134985	0.0402564	0.00854462	0.00471524	0.0329226	0.0466021	0.0411193	0.0389651	0.00989312	0.01616	0.0328172	0.0428048	0.0216538	0.0162159	0.00430283	0.0353065	0.0342752	0.00101612	0.0201167	0.0140089	0.0241245	0.00356233	0.00983869	0.00549495	0.0202878	0.0147469	0.0265943	0.0310935	0.023034	0.038622	0.000573397	5.33138e-05	0.000234242	0.000123989	0.000468844
shared	K10925	NIT1, ybeM; deaminated glutathione amidase [EC:3.5.1.128]	0.000584744	0.0100384	0.000674795	0.00258212	0.0347733	0.0472295	0.00981164	0.0336482	0.00133835	0.0158382	0.0127321	0.0076892	0.00576875	0.122779	0.00875097	0.00592841	0.00717371	0.101889	0.0225046	0.0323506	0.000381839	0.000544017	0.000598381	9.47095e-05	0.000235737	0.000118617	0.00195232	0.00779765	0.00694485	0.000255983	0.000963933	0.00450689	0.00290076		0.00917197	0.00159893	0.00419588	0.0028339	0.00954008	0.0167465	0.00335745	0.00297553
shared	K11206	H2A; histone H2A	0.00223116	0.00234746	0.00202333				2.34332e-05		3.34889e-06						3.64824e-05				0.000626539	0.000199198	0.00513784	0.0201237	0.0102484	0.00586018	0.00419092	0.00502135		0.000268265	0.00323249	0.000305069		4.31108e-05	0.000356581	6.99078e-05	2.02907e-05	0.000214217	0.00380238	0.00170125		0.00104655			2.16512e-05	0.000441014	0.000120207	0.000244993
shared	K11251	bkdA; 2-oxoisovalerate dehydrogenase E1 component [EC:1.2.4.4]	0.00296237	0.00586892	0.00886463	0.00538427	0.208291	0.0261364	0.0295275	0.00253542	0.00314088		0.229965	0.259082		0.00641519	0.0201726	0.00373624	0.338483	0.00806925	0.0259714	0.00958292	0.0188996	0.00491327	0.00687983	0.0261826	0.0385697	0.0177707	0.0498646	0.0418363	0.0455248	0.0173201	0.0645915	0.055454	0.129023	0.019605	0.1534	0.0559262	0.0307023	0.0384088	0.0570109	0.0421251	0.015664	0.0321909	0.0176876	0.0161138	0.0324193	0.196244	0.344426
shared	K11381	glpX-SEBP; fructose-1,6-bisphosphatase II / sedoheptulose-1,7-bisphosphatase [EC:3.1.3.11 3.1.3.37]	9.95956e-06	4.76542e-06	3.15679e-05		3.40433e-05		3.89346e-05		2.70209e-06		0.00108564	4.79049e-05					0.000520069					8.53518e-06							0.000598327	0.000113404			0.000160625	0.000238961	1.28766e-05		8.20077e-05	6.33878e-05	6.59629e-05		1.20623e-05		9.75337e-06	0.000214941		0.000216183
shared	K11532	rhlE; ATP-dependent RNA helicase RhlE [EC:3.6.4.13]	0.000556137	0.000163411	0.00133889		0.00036947	0.00167263	0.000389464		4.37392e-06	0.000200781	0.0020429		0.0168405		0.00285352		0.00286141		0.000207635	0.000364685		0.0288418	0.0444723	0.00872654	0.00910673	0.0114846	0.0405488	0.00917368	0.00343978	0.00719665	0.0739555	0.00380014	0.00296064	0.0201735	0.135051	0.0557032	0.0276109	0.0189383	0.0142036	0.00118996	0.00909203	0.143821	0.0999509	0.0186266	0.0248199	0.00449304	0.00500872
shared	K11927	urtE; urea transport system ATP-binding protein	0.013899	0.0320756	0.0119282		0.00027184		0.00669383	0.0193777	0.00118922	5.66237e-06	0.000726882	0.00780287	0.000222009	0.000252987	0.00979769		7.73739e-05	0.00610714	0.0133772	0.0103507	0.232231	0.017343		0.091187	0.0663438	0.0760765	0.0115981	0.000266503	0.165761	0.0923004	0.0358451	0.000311905	0.0198264	0.00139671	0.000166868	7.77535e-05	0.0114058	0.0398536	0.0501163	0.145454	0.00842731	0.100667	2.76638e-05			0.000206621	0.007039
shared	K11963	ASAH1; acid ceramidase [EC:3.5.1.23]	0.0401521	0.0483696	0.110816	0.00198178	0.54151	0.106496	0.0148948	0.0526627	0.00279941	0.0176495	0.00016633	0.000643791		0.00275509	0.0139632	8.84518e-05	0.000539383	0.0991696	0.0154562	0.0867884	0.00250915	0.027403	0.0296885	0.000164891					0.00104466	0.0120508		0.000544952	0.00383646				0.000518173	1.52949e-05	5.45233e-05	7.52071e-05	6.47367e-05
shared	K12348	HSD17B4; (3R)-3-hydroxyacyl-CoA dehydrogenase / 3a,7a,12a-trihydroxy-5b-cholest-24-enoyl-CoA hydratase / enoyl-CoA hydratase 2 [EC:1.1.1.- 4.2.1.107 4.2.1.119]					0.000734208		6.59585e-05	3.93365e-05						7.01083e-05				0.00029462			0.000281763	0.00049576	0.00141928	0.000737286	0.00107704	0.00334645	0.00238948	0.00590766	0.00189171	0.00490681	0.00541345	0.00014029	0.000419402	0.000331448	0.00078594	0.00301618	0.000619491	0.00184617	0.0038145	0.00340918	0.000219669	0.000125764	0.00486469	0.00463312	0.00283414	0.000808052	0.000610852
shared	K12405	LMNA; lamin A/C																											0.000394016		1.87176e-05	0.000925478	0.000499628				4.17246e-05	0.00156128		3.43497e-05	0.00017516	2.03864e-05	0.000263145		0.00115559	0.000775367	5.00439e-05	0.000162793
shared	K12641	HNRNPF_H; heterogeneous nuclear ribonucleoprotein F/H	0.000443081	0.000918654	0.000582169	0.150941	0.483255	1.43507	0.144162	0.00500021	0.0180436	0.0146578		0.0482331	0.00899971	0.0272766	0.0804911	0.153805	0.589021	0.0562949	0.0686008	0.0182439	2.84025	0.476114	0.214402	2.4552	3.94296	4.33949	5.26197	4.54553	2.58201	8.00075	5.38807	0.0426161	0.0382901	0.0188426	0.998419	2.67127	0.929507	2.29468	4.15667	2.81825	1.1502	2.60289	10.0602	3.84102	5.37445	1.34481	2.81856
shared	K12898	ahr; alcohol/geraniol dehydrogenase (NADP+) [EC:1.1.1.2 1.1.1.183]					0.00683767	0.00135093	2.70229e-05	0.000621461		4.73207e-05	0.000236753	5.97094e-05	0.0064262	0.000120263		2.13676e-05	3.9417e-05	0.000161031	1.55776e-05	1.38781e-05	0.0005252			0.00215628	0.00442513	0.00316944	9.04545e-05	0.00667617	0.00348734	0.000399079	0.0129612	0.000507838	0.000668203	0.000114503	0.00353563	0.00056926	0.00215613	0.00627458	0.00460629	0.00494977	4.27884e-05		0.0122912	0.00723155	0.0144026	0.00140186
shared	K12957	EIF4A3, FAL1; ATP-dependent RNA helicase [EC:3.6.4.13]	0.0025339	0.00624459	0.000930245				0.000605931	6.77863e-05		0.000722058									0.00221995	0.00400896	0.0031365	0.0239969	0.0198395	0.00304112	5.71864e-05	0.00170273	0.00279876	0.00613406	0.0122165	0.000271031	0.000654031	0.00901419	0.019285	0.00534347	0.00666803	0.0325156	0.00132451	0.00932708	0.00654933	0.0105021	0.00444572	0.00434113	0.000231861	0.00334607	0.00254198	0.00261842	0.00613019
shared	K13025	ASRGL1, iaaA; L-asparaginase / beta-aspartyl-peptidase [EC:3.5.1.1 3.4.19.5]		0.000477039			0.0212314			0.00291879	1.24135e-06	5.3352e-05		0.00343978	0.00814846			4.20204e-05	4.27368e-05	2.90879e-05	6.32722e-05	0.00163476	0.000466065	0.00184871	0.00092964	0.000192146	0.000329066	0.00522692	0.00024478	0.00638758	0.000336029	0.0311109	0.000648513	0.00115794	0.0100583	0.00527364	0.0276585	0.132614	0.0115855	0.00506887	0.0014809	0.000181354	0.00323562	0.0189603	0.00109815	2.64685e-05	0.000317865	0.0514505	0.000784354
shared	K13051	INTS4; integrator complex subunit 4	7.29138e-05	0.000442763	0.000399284	0.000908944	0.000300667	0.000725052	0.000745201	3.88347e-05	0.000159003	0.00136713		0.00119945	0.000122966	2.99408e-05	4.02344e-05			0.000352735	0.00296074	0.00331332	0.00350341	0.00276462	0.00257727	0.0024557	0.000526303	0.00156978	0.000607604	0.00432748	0.00437085	0.00041971	0.00289769	0.00304296	0.00409868	0.000829235	0.00638479	0.00017349	0.00115689	0.00325736	0.00682105	0.0159801	0.0102419	0.00121166
shared	K13141	NIT2, yafV; omega-amidase [EC:3.5.1.3]																						0.000207623	0.00051024	0.000741394	0.000564951	0.000313512	0.00734796			0.00672019			0.000244737			0.00832502	5.938e-05	0.000270407	0.000146191		0.000516264		0.0165601	0.0104182	0.00113741	0.00308909
shared	K13566	atuF; geranyl-CoA carboxylase alpha subunit [EC:6.4.1.5]																					0.00513784	0.00647744	0.00743115	0.00586018	0.00419092	0.00502135		0.000268265	0.00298624	0.000305069		4.31108e-05	0.000356581	6.99078e-05		0.000214217	0.00380238	0.00170125		0.00031519				0.000441014
shared	K13777	LYZ; lysozyme C [EC:3.2.1.17]								0.000701749		0.000357059		0.000269009	0.00165026	0.000425905	4.3293e-05	0.000131546	0.000620767	0.00020425		1.15617e-05	0.000536611	0.00890233	0.00954287	0.00321054	0.00971967	0.00384419	3.10668e-06	0.00106975	0.00169565	9.6271e-05	0.00395727	0.00105949	0.00379462	0.00740923	0.0015086	0.000881323	0.00140882	0.00082851	0.000833939	0.00114179	1.0192e-06	9.59025e-05
shared	K13915	NUP133; nuclear pore complex protein Nup133	0.000867047	0.0011668	0.00129357		0.00527575	0.00611878	0.0183122	0.00738968	0.00332924	0.00123101	0.00121963	0.00753638	0.00344646	0.00295813	0.0487801	0.00163158	0.00725218	0.00429974	0.0111431	0.00832416	0.0570895	0.00543084	0.00920545	0.0073715	0.00557295	0.0126505	0.0117917	0.0283413	0.00805835	0.0351364	0.0310639	0.0178996	0.00251346	0.0019258	0.00420422	2.77122	0.0046333	0.0104351	0.0176338	0.00611841	0.0183321	0.0247507	0.0154985	0.00588889	0.00530025	0.0164979	0.00659564
shared	K14300	ccr; crotonyl-CoA carboxylase/reductase [EC:1.3.1.85]	1.51335e-05	5.76971e-06	0.000724045			0.00019542	9.10947e-05	0.00386301	5.72391e-06	0.000252073	6.72933e-05	0.00026694		0.00054483		0.000393891			0.0217588		0.000372166	0.000679626	0.00250064	0.000394078	0.000321916	0.000556025	0.000438242	0.00789763	0.00136636	3.11189e-05	0.00172638	0.0104773	0.00932528	0.000715027	0.00651354	0.00399692	0.00130797	0.000588427	0.00169064	0.0017583	0.157928	0.000823088
shared	K14446	GOT1; aspartate aminotransferase, cytoplasmic [EC:2.6.1.1]			0.0011134	0.000267278			4.34687e-06	0.000212894	1.41529e-05	0.000799413	0.000585477	0.0332855	0.000160455	0.000602881	0.000152701		3.91263e-05	0.00012122	4.55606e-05	1.79001e-05			0.00239908						0.000772891				0.0183888
shared	K14454	mlhB, chnC; epsilon-lactone hydrolase [EC:3.1.1.83]		9.62783e-05					9.88464e-05		8.40153e-06	1.34583e-05					1.287e-05	6.99509e-07		8.87079e-07	0.000148895	0.000393565		0.000873211	0.00111929	4.20815e-06			0.000138699	7.23595e-05	0.000477082		1.68988e-05				0.00015385	0.00071812	1.95392e-05	3.81697e-05	3.30151e-05	0.000173113	7.71332e-05	1.56094e-05	8.83973e-05	0.000149889	0.000170089	0.000569243	0.000174232
shared	K14731	fhaB; filamentous hemagglutinin		0.000356657	0.000711366				0.000389091		5.78821e-06	0.000110556	0.0202171	0.000119947	5.79712e-05		0.000313874		0.00220776		7.42315e-05	2.83606e-05	0.00368499	0.000809305	0.000505057	0.000108934	6.96114e-05		6.2641e-05				7.19537e-05		6.42782e-05	1.98142e-05	9.5641e-06		0.000115649	2.16691e-05	3.39245e-05	1.84781e-05	2.76333e-06		0.00248838	0.00379535	0.000647434	0.000573948	0.000855378
shared	K15125	UAF30, SPP27; upstream activation factor subunit UAF30	0.04707	0.0112598	0.00232829		0.00173671		0.00164467	0.000105061	1.47554e-06	0.00365673	0.00101926	0.00147543	9.3228e-05	0.000745271		0.000611895	0.000108148	0.000163428	6.91513e-05	8.8252e-05	0.122837	0.0223166	0.0219018	0.0120629	0.117304	0.0110703	0.000923142	0.0198623	0.0110642	0.000439784	0.00131795	0.00302004	0.005064	0.00906723	0.000852032	0.000198523	0.0151282	0.105548	0.00534488	0.00539556	0.000584555	0.000690462	0.00658263	0.0140054	0.00539834	0.000385378
shared	K15223	TPRKB, CGI121; EKC/KEOPS complex subunit TPRKB/CGI121	5.33721e-05	4.17179e-05	0.000154572	6.64517e-05	0.0229713	0.00141984	0.00152623	0.00417202	0.00011872	0.00512646	0.00146273	0.00478609	0.0159745	0.00161202	0.00010798	0.000537857	0.00218714	0.000728221	0.000907649	0.000995296	0.00377106	0.00814896	0.0105399	0.00931492	0.00901228	0.0106438	0.000987289	0.0111053	0.0196178	0.00514898	0.0139423	0.0121041	0.577019	0.209082	0.0640605	0.00364416	0.0754383	0.0443658	0.0331038	0.0126241	0.00796239	0.00339902	0.00637321	0.00466758	0.0158151	0.00840322	0.0194914
shared	K15901	CETN1; centrin-1																						0.0202744	0.00427431							0.0810767			0.00114474	0.00196807	0.00110522		0.00018296	0.0343796	9.66338e-05	6.83517e-05	0.000243001		0.0858334	0.384598	0.0278405
shared	K16465	CETN3, CDC31; centrin-3																								0.00313473			0.00777543	0.00251805						0.0312343	0.0888233				0.00691735	0.00423213		0.000688982	0.105313	0.0477679	0.0735065	0.194951	0.0315641
shared	K16466	MOX; alcohol oxidase [EC:1.1.3.13]																								0.000597152			0.00148119	0.000479678						0.00816172	0.0192274				0.00131772	0.000806203		0.000131248	0.0100824	0.0131377	0.00800706	0.0770749	0.00346748
shared	K17066	inoE; inositol-phosphate transport system substrate-binding protein																					1.47371e-05	1.72607e-05	6.16402e-05	0.000373163	0.000144486	0.000357591	0.00118371	0.000270365	0.0342466	0.000115526	0.000239598	0.000159921	0.00183008	0.000610976	0.00021824	0.00246144	0.000414547	0.00068233	0.000349236	0.000485859	0.000683478	0.000728188	7.07796e-05	4.63675e-07
shared	K17237	dmdA; dimethylsulfoniopropionate demethylase [EC:2.1.1.269]		0.00535699	0.000687351				0.00180885	0.00336214	4.82494e-05		0.000124769	0.00861309	0.00258641	0.00103793	6.5956e-05			0.00451661	0.00171337	0.00130324	0.571021	0.166006	0.228667	0.306671	0.346083	0.295008	0.724968	0.0241975	0.0279116	0.1956	0.0440762	0.0298001	0.0296017	0.0911017	0.00211902	0.00900045	0.0777336	0.0559482	0.00749408	0.0179425	0.284782	0.0520404
shared	K17486	engCP, engBF, endoEF; endo-alpha-N-acetylgalactosaminidase [EC:3.2.1.97]																					0.0046029	0.000737261	0.000393285	0.00697182	0.00418213	0.00351632	0.0131366	0.00458817	0.00224129	0.000288384	0.0049232	0.0109427	0.0221856	0.0142963	0.00532042	0.014134	0.0109237	0.00879322	0.00574407	0.00410532	0.0170621	0.0238745	9.82081e-05	0.000257586	0.000202121	0.000167208
shared	K17624	legG, neuC2; GDP/UDP-N,N'-diacetylbacillosamine 2-epimerase (hydrolysing) [EC:3.2.1.184]																					0.0109866	0.000476422	0.00163401	0.00340772	0.00174574	0.00258331	9.49286e-05	0.000735577	0.000368909								0.00207929	0.00148764	0.000421273	0.000416658	2.3769e-05					1.9066e-05
shared	K18429	ptxD; phosphonate dehydrogenase [EC:1.20.1.1]	2.67569e-05	0.000146997			0.000167882	0.000153005	0.000201762	0.00199324	5.60276e-05	0.000192555	0.00172091	0.00165533	0.000489465	0.0029749		3.28174e-05		0.00312891	9.72118e-05	0.000659874		6.74182e-05	9.63065e-05	9.83842e-05	3.95937e-05	2.14708e-05		1.93783e-05	0.000110654	1.32991e-05							0.000110829	2.05494e-05		1.73697e-05				0.000203026
shared	K18916	EXOC5, SEC10; exocyst complex component 5																					0.00249706	0.0072182	0.00530389	0.000478696	0.000888734	0.000567811	0.00042412	0.000745411	0.000113711	0.000646995	0.000251088	8.47597e-05	0.000287345	5.27882e-05	0.000251541	7.37412e-05	0.000306012	0.00029173	0.000355225	8.06725e-05	0.000665948	0.00080684	2.17043e-05	0.000393232	3.33716e-06		0.000241261
shared	K19984	TRAPPC6, TRS33; trafficking protein particle complex subunit 6	0.00193641	0.00382422	0.0842568		0.0028169		0.137392	0.0035708	0.0105491	0.0113935	0.00212614	0.00553516		0.00555517	0.372396	0.0129032	0.0544195	0.00187036	0.166805	0.104055		0.00185309	0.00176728							0.000154062					0.00228749								0.000506729	0.000103367	0.00115327	0.0037692	0.00304746
shared	K20304	GOLGB1; golgin subfamily B member 1	0.000134889	1.04852e-05			0.000154806		1.78267e-06	7.11289e-06	7.92986e-07	0.000298596	8.91544e-05	5.63708e-05				9.84348e-05		8.56551e-06	2.90759e-06		0.000881947	7.85862e-05		0.000115008	0.000135799	1.29256e-05		8.50095e-05	6.34573e-05	2.35443e-06	0.000199393	8.88569e-05	0.00161958		0.00014076	0.000381783	0.00036346	0.00013262	9.10702e-05	0.000160905	4.58638e-06		2.20856e-05	0.000318898	0.000171432	9.62095e-05	0.000234535
shared	K20478	K20974; two-component system, sensor histidine kinase [EC:2.7.13.3]	0.000443081	0.000918654	0.000582169	0.150941	0.483255	1.43507	0.144162	0.00500021	0.0180436	0.0146578		0.0482331	0.00899971	0.0272766	0.0804911	0.153805	0.589021	0.0562949	0.0686008	0.0182439	2.84025	0.47614	0.214461	2.4552	3.94296	4.3395	5.26199	4.54554	2.58202	8.00075	5.38814	0.042647	0.0383141	0.0188732	0.99843	2.67128	0.929512	2.29469	4.15667	2.81828	1.1502	2.60289	10.0604	3.84107	5.37473	1.34492	2.81856
shared	K20974	S100A7; protein S100-A7	0.000818116	0.0019785	0.000700144				0.00352588	0.000900311	0.0512136	0.00263314				0.00269766	0.000831291		2.86796e-05		0.000362159	0.000313436		0.00156263	0.000485668			2.72649e-05	2.95101e-06	0.000396078	0.000651811	0.00138568		0.000105411		8.71593e-05	0.000867526	0.000479728	0.00013403	2.4428e-05	0.000424266	0.000916844	0.000551961
shared	K21126	S100A8; protein S100-A8	0.00403454	0.00499052	0.00968416	0.0244193	0.0344226	0.0155151	0.113551	0.0160938	0.903442	0.00818598	0.00796614	0.0178864	0.00470214	0.0269905	0.0130231	0.0105099	0.0100655	0.0189379	0.124336	0.0664041	0.00212025	0.00125984	0.00140749	0.00559215	0.00727377	0.0137161	0.0139543	0.00855882	0.00522776	0.0705985	0.0117953	0.0046948	0.00345581	0.002348	0.00593595	0.0413166	0.00521623	0.00607938	0.00307647	0.00882716	0.0176141	0.0165613	0.0512946	0.0253025	0.0195743	0.0104158	0.0446034
shared	K21127	GSS; glutathione synthase [EC:6.3.2.3]	0.000572277	0.00182931	0.000687137		0.242532	0.00487475	0.00583543	0.000844214	0.00148455	0.00464585	0.000410078	0.0108176	0.000138788	0.000260683	0.0153658	0.00051464		0.00207337	0.00497267	0.00269863	0.113423	0.00945241	0.010257	0.00985347	0.0243103	0.0184307	0.0969796	0.0207628	0.0149544	0.255253	0.018604	0.00661661	0.0120745	0.00579312	0.0108858	0.480311	0.00536373	0.0116344	0.0171721	0.0172657	0.0916479	0.0794049	0.0618189	0.050223	0.0289693	0.0066253	0.0272666
shared	K21456	E1.1.1.1, adh; alcohol dehydrogenase [EC:1.1.1.1]	0.000108773	8.45517e-06			0.000124834		1.43753e-06	5.73577e-06	6.39457e-07	0.000240785	7.18933e-05	4.54569e-05				7.9377e-05		6.90715e-06	2.34466e-06		0.000711194	9.12665e-05	2.8816e-05	9.27415e-05	0.000115932	1.04231e-05	9.93972e-06	0.000110621	5.11714e-05	1.89859e-06	0.000193216	0.00020087	0.00130601		0.000350361	0.000641887	0.00031476	0.000115867	0.000101496	0.000142884	6.0693e-05	8.20265e-05	1.78097e-05	0.000257156	0.000138241	7.75825e-05	0.000189127
fraction	K00001	UGDH, ugd; UDPglucose 6-dehydrogenase [EC:1.1.1.22]	0.000614564	0.00151576	0.0020869	0.00902025	0.0238887	0.256711	0.00559704	0.286189	0.000537233	0.0141382	0.0168264	0.0383221	0.0258853	0.0484849	0.00692553	0.0182088	0.318385	0.0269601	0.00985236	0.00265007	0.00397757	0.0512328	0.0659817	0.0587303	0.00910144	0.0560035	0.00211197	0.00442994	0.0434599	0.00261645	0.0188603	0.0116663	0.0283399	0.0210858	0.0140352	0.0017756	0.0185363	0.0262965	0.00569197	0.0108148	0.00282453	0.0241229	0.000326701	0.000163443
fraction	K00012	hisD; histidinol dehydrogenase [EC:1.1.1.23]	0.0373464	0.050991	0.0531497	0.00204804	0.00702052	0.0218116	0.0199044	0.0424365	0.00494004	0.00687829	0.0439217	0.0304609	0.0192111	0.00786422	0.00723775	0.00674467	0.0128586	0.00419219	0.0285524	0.0425725	0.0172825	0.0439228	0.0409909	0.022721	0.0131205	0.0486461	0.025148	0.0691327	0.071368	0.0510459	0.0212501	0.0493484	0.0540258	0.264356	0.0431292	0.0357707	0.0862721	0.0486474	0.0353952	0.069771	0.00756795	0.130479	0.0557538	0.129896	0.0743538	0.0412161	0.041009
fraction	K00013	LDH, ldh; L-lactate dehydrogenase [EC:1.1.1.27]	5.41696e-05	8.83391e-05	0.000462573		3.03182e-05	0.000200625	0.00499289	0.00409526	0.000127344	0.00444544	0.00147768	0.000658305	0.000138304	0.00156912	0.00348669		0.000880416	0.00500015	0.00468495	0.00320077		0.00219493	0.00305754	8.88898e-05			0.00030395	7.04829e-06	0.000106034						0.000437617	0.000130778	8.86401e-05	7.47113e-06	3.45098e-05		0.000225752		0.00139268	0.0605334	0.0705778	0.00437137	0.000520372
fraction	K00016	hprA; glycerate dehydrogenase [EC:1.1.1.29]	8.59793e-05	0.0024126	0.0220447		0.0221033	0.000132818	0.0284938	0.000558721	0.000883545	0.00248346	0.000870857	0.00026973			0.0351106	0.000652826	0.00168541	0.000315727	0.00825302	0.000335714	0.000126146	0.00193135	0.00183797	0.00643928	0.00150273	0.00205667	0.0156807	0.000312975	0.00459338	0.000970631	0.000728388	0.00772725	0.00598643	0.000170407	0.000459997	0.0239227	0.00373904	0.00341048	0.000693504	0.00706677	0.0301541	0.0829472	0.00032651	0.000195047	0.000176017		0.000103106
fraction	K00018	HIBADH, mmsB; 3-hydroxyisobutyrate dehydrogenase [EC:1.1.1.31]			1.84948e-05		7.78468e-05		3.60474e-06	0.00107491	6.59817e-06			0.000511274	0.000175267	0.000846286	1.09318e-05		0.00462678		2.50101e-05	6.66852e-05	0.00533624	0.0174082	0.0237801	0.00530474	0.00989846	0.0145432	0.02286	0.000916541	0.000535213	0.000755808	0.000604387	0.00954802	0.0050032	0.000722068	0.00548816	0.00183433	0.00208042	0.00144148	0.00121553	0.000207888	0.00495078	0.00999392	0.00401502	0.00810076	0.00183783	0.00800486	0.000314677
fraction	K00020	HMGCR; hydroxymethylglutaryl-CoA reductase (NADPH) [EC:1.1.1.34]	0.00658482	0.0151511	0.00705259	0.00195732	0.0010814	0.000163313	0.010686	0.0034178	0.000809325	0.0353787	0.00339432	0.00784061	0.00152313	0.00564268	0.001715	0.000360195	0.00054187	0.010088	0.00994688	0.0127241	0.0455416	0.0124734	0.0090239	0.0439183	0.0845016	0.116385	0.000256345	0.0314459	0.0565245	0.000522153	0.00341385	0.00409439	0.000263549	0.00381957	0.0277171	0.000557793	0.0947363	0.0721256	0.0349781	0.0242076	0.00107983		0.00051158	0.0607835	0.000653877	0.000868549
fraction	K00021	phbB; acetoacetyl-CoA reductase [EC:1.1.1.36]	0.0350792	0.103545	0.0436233	0.000358077	0.0359863	0.000243008	0.00797508	0.00504453	0.000339009	0.0244403	0.01234	0.00614098	0.00604995	0.0018955	0.00333804	0.000965781	0.0138699	0.00591861	0.0134665	0.0227228	0.00741513	0.00751398	0.0119366	0.000981405	0.000424791	0.00145814	0.000753506	0.00440978	0.00474845	0.000279395	0.00392974	0.000230295	0.00247398	0.00142606	0.00772548	9.06484e-05	0.00290246	0.00196163	0.00640982	0.00589946	0.000605105	0.00187943	5.38748e-05	0.00439079
fraction	K00023	mdh; malate dehydrogenase [EC:1.1.1.37]	0.00329994	0.0014269	0.00149717		0.000591847	0.000202981	0.00347565	0.000748475	0.000268236	0.000687974	0.000248749	0.00082991	0.00026052	4.15683e-05	0.000452288	0.000110347	0.000276343	0.00032575	0.000117225	0.00852483	0.0133918	0.0523902	0.0317581	0.00960059	0.0016818	0.00305148	0.00903459	0.000492441	0.00280098	0.000968161	0.0149222	0.00624445	0.0090237	0.0129033	0.00352294	0.00185566	0.00172298	0.00166481	0.00437337	0.0015163	0.00305339	0.0161052	0.00800143	0.0120619	0.00124089	0.000207579
fraction	K00024	MDH1; malate dehydrogenase [EC:1.1.1.37]	0.017368	0.177423	1.14186	0.618903	0.258131	0.225975	0.502877	1.21136	0.0526142	0.211111	0.214686	0.305416	0.46284	0.544628	0.557832	0.281689	9.32831	2.18488	0.280804	0.286775	0.427513	0.529374	0.416469	0.178274	0.198221	0.178639	0.16256	0.230032	0.448155	0.0218106	0.145144	0.144188	0.227351	0.303519	0.174948	0.195316	0.175369	0.12752	0.245337	0.328804	0.330783	0.759211	0.0166928	0.185338	0.152366	0.103769	0.0939108
fraction	K00025	ME2, sfcA, maeA; malate dehydrogenase (oxaloacetate-decarboxylating) [EC:1.1.1.38]	4.43734e-05	0.000115055	6.08737e-05		0.00145119	0.00100788	0.000327247	0.0689521	2.82335e-05	0.0018884	0.00322051	0.00373202	0.00211018	0.000727662	0.000211394	6.71647e-05	0.000194305	0.0143782	0.00020481	0.000350671	6.26912e-05	0.00169249	0.000609795	5.58888e-05			1.26017e-06	0.000229888	0.00163016		0.00026792	3.93654e-05	0.000110087	0.000313251		1.14756e-05	0.000273836	8.75409e-05	0.000107234	5.5246e-05		1.85164e-05	0.00189586	0.00218439	0.00492268	0.00902464	0.00698692
fraction	K00027	E1.1.1.40, maeB; malate dehydrogenase (oxaloacetate-decarboxylating)(NADP+) [EC:1.1.1.40]	0.0112811	0.038478	0.0220406	0.0167409	0.00416414	0.00910354	0.0484312	0.0195103	0.0246365	0.0269704	0.00732087	0.0119768	0.0144515	0.00505405	0.0481579	0.00193022	0.0100049	0.0246481	0.0430939	0.0521674	0.0774161	0.151589	0.172067	0.0377922	0.0132669	0.0144704	0.0166287	0.0387388	0.0368506	0.00226447	0.0175163	0.0603427	0.0498141	0.0794532	0.016978	0.0199012	0.0516136	0.0383977	0.0306836	0.0330202	0.0256191	0.0485867	0.00203222	0.230578	0.112625	0.00989689	9.80186e-05
fraction	K00029	IDH3; isocitrate dehydrogenase (NAD+) [EC:1.1.1.41]	0.0114929	0.0391721	0.0281916	0.0195598	0.00454529	0.00922883	0.0491673	0.0261047	0.0246948	0.0329237	0.00943995	0.0140848	0.0159608	0.00582429	0.050658	0.00232355	0.0100069	0.027186	0.0435763	0.0535411	0.0717392	0.151516	0.154143	0.0200681	0.0549243	0.0143952	0.0191031	0.0315236	0.0392461	0.00734794	0.0471675	0.0628383	0.0483309	0.105303	0.0388558	0.0267663	0.10488	0.0678069	0.035045	0.033512	0.0348312	0.0628251	0.00232167	0.464947	0.233721	0.00150826
fraction	K00030	IDH1, IDH2, icd; isocitrate dehydrogenase [EC:1.1.1.42]	0.0204568	0.0557092	0.0172	0.00393136	0.0478807	0.0170766	0.0351742	0.00328529	0.0290667	0.00639511	0.03813	0.00572597	0.020443	0.0145909	0.0465227	0.00242388	0.00212402	0.00748627	0.0364834	0.0460984	0.0073313	0.0757228	0.0592785	0.00402382	0.00444157	0.00561244	0.00675789	0.0199628	0.0156316	0.00132516	0.00260435	0.203346	0.329248	0.166105	0.0155806	0.00152956	0.00476593	0.00149224	0.0123511	0.025736	0.0121807	0.00744292	9.71173e-05	0.00726951	0.00454011	0.00178562	8.4684e-05
fraction	K00031	PGD, gnd, gntZ; 6-phosphogluconate dehydrogenase [EC:1.1.1.44 1.1.1.343]	0.174551	0.575919	0.379469	0.109517	1.60727	2.35868	0.980203	0.852841	0.0328737	0.0764318	3.54366	3.70462	2.33031	0.214301	0.912669	0.0490342	0.124509	0.235888	0.258578	0.265169	0.742158	0.640785	0.761249	0.0607466	0.0617162	0.109529	0.187317	0.0629874	0.134365	0.152444	0.264524	0.141513	0.150825	0.10146	0.0929892	0.0776907	0.0990328	0.0608062	0.130228	0.131305	0.231336	0.125183	0.0267315	0.346622	0.282336	0.115359	0.0646813
fraction	K00033	gdh; glucose 1-dehydrogenase [EC:1.1.1.47]	0.0031274	0.00343158	0.0425687		0.00200989	0.000482354	0.000527181	0.0186189	4.75555e-05	0.00129795		0.00258239		2.04974e-05	0.00012043			0.000107901	0.00070654	0.00301843	0.00911947	0.0569142	0.01953	0.00304309	0.0715274	0.00429968	0.0105407	0.0260707	0.103397	0.0171699	0.0203312	0.0604743	0.0977663	0.00296167	0.0569746	0.0095584	0.0191074	0.0266642	0.02412	0.0374187	0.0197205	0.0174913	0.00331603	0.0247404	0.00705256	0.000824287	0.00170104
fraction	K00034	G6PD, zwf; glucose-6-phosphate 1-dehydrogenase [EC:1.1.1.49 1.1.1.363]	5.49145e-05	3.94276e-05	2.57244e-05				2.53651e-05								6.87498e-05				0.000152691	0.000138897				0.000184335				0.000112345	0.000407211		9.21039e-05				0.000468437		0.000367705	0.000186238	0.000126581	6.41534e-05
fraction	K00036	E1.1.1.53; 3alpha(or 20beta)-hydroxysteroid dehydrogenase [EC:1.1.1.53]	0.0463819	0.0528336	0.0286284	0.000121467	0.0026874	0.000508054	0.0146674	0.00210201	0.00390942	0.00731539	0.019929	0.0284525	0.0298297	0.0017108	0.00491414	0.000975452	0.0325269	0.00298659	0.0228265	0.0228406	0.001327	0.239365	0.203904	0.0359173	0.0118423	0.0253091	0.0274415	0.0914729	0.102639	0.00426976	0.0449705	0.0546261	0.0294175	0.0321263	0.0656139	0.0212528	0.035099	0.104289	0.0792267	0.170542	0.0226009	0.111869	0.000528436	0.00526798	0.00165604	0.000941389	0.000204384
fraction	K00038	garR, glxR; 2-hydroxy-3-oxopropionate reductase [EC:1.1.1.60]		0.000170254	0.000103313	0.000855757	0.00084312	9.96752e-05	0.000757518		8.89929e-06	0.000190659		9.78047e-05			3.48615e-05		0.000428861	0.00037042	0.00278861	2.49562e-05	0.00579124	0.000208318	0.000256421	0.0230868	0.0365628	0.0517094	2.86033e-05	0.000120879	0.0305083	0.00017901	2.79596e-05	5.92709e-06	0.000261316	0.000730599	0.01013	0.000940808	0.015002	0.0239637	7.57388e-05	0.061316	3.57659e-05	0.000234878	0.000259552	0.00245401	0.000663417	0.00243929	0.000799123
fraction	K00042	leuB, IMDH; 3-isopropylmalate dehydrogenase [EC:1.1.1.85]	0.00510127	0.00997179	0.00620008	0.00195732	0.0010814	0.000163313	0.0092412	0.00307315	0.000800608	0.0340773	0.00335957	0.00765647	0.001219	0.00522313	0.001715	0.000331214	0.00054187	0.00892151	0.00976568	0.0126355	0.0437347	0.00955917	0.00713778	0.0422122	0.0840943	0.114993	0.000218427	0.0314459	0.0559368	4.48864e-06	0.00341385	0.00192327			0.0266188	0.000100319	0.0937247	0.0718997	0.033736	0.0229926	0.00107107		0.000212271	0.0564073	0.000379138
fraction	K00052	ilvC; ketol-acid reductoisomerase [EC:1.1.1.86]	0.0136535	0.0298206	0.0301964	0.00331291	0.00382115	0.00708278	0.0451201	0.0529967	0.00240867	0.0372763	0.0126275	0.0282239	0.00655356	0.0145361	0.131622	0.00244106	0.00345708	0.0522673	0.069425	0.144866	0.000328299	0.00960653	0.015133	0.00101149	0.000149385	0.000155639	0.00576567	0.000329318	0.00109927	0.00366294	0.00130017	0.0243541	0.00269128	0.00184576	0.00227919	0.00235112	0.00179732	0.000948004	0.000812393	0.00134908	0.00290158	0.00466128	0.000326645	0.00781956	0.0048965	0.00110389
fraction	K00053	serA, PHGDH; D-3-phosphoglycerate dehydrogenase / 2-oxoglutarate reductase [EC:1.1.1.95 1.1.1.399]	0.0961997	0.231724	0.0536502	0.0514548	0.0779631	0.0337767	0.278538	0.386542	0.554426	0.115667	0.153051	0.238731	0.183946	0.362121	0.232574	0.0266062	0.0221475	0.44439	0.230521	0.21685	1.28163	0.2333	0.259974	0.13949	0.0874958	0.120061	0.161828	0.080336	0.140352	0.128729	0.147918	0.541998	0.363033	0.0928442	0.365389	0.104909	0.158011	0.109525	0.151751	0.123098	0.587005	0.479051	0.0842614	0.428343	1.17081	0.0785092	2.18911
fraction	K00058	IMPDH, guaB; IMP dehydrogenase [EC:1.1.1.205]	0.127725	0.177714	0.0858981	0.0515225	0.0197497	0.243243	0.116141	0.062278	0.0160332	0.0817197	0.102612	0.299144	0.00399978	0.0176133	0.0268634	0.0231035	0.00639981	0.0241979	0.116902	0.170776	0.0280684	0.178349	0.269386	0.0361795	0.0256089	0.0402396	0.0649116	0.0286318	0.0719144	0.00554612	0.0343297	0.115632	0.0986693	0.178564	0.0574665	0.0477564	0.0283349	0.0187735	0.0422808	0.0486919	0.0486493	0.0683114	0.0176055	0.071421	0.00515046	0.0214086	0.016549
fraction	K00088	pdxA; 4-hydroxythreonine-4-phosphate dehydrogenase [EC:1.1.1.262]	0.0574499	0.050787	0.0151916	0.00347115	0.0226722	0.00570905	0.0468034	0.0222445	0.0510838	0.0285972	0.00851782	0.0164783	0.0121745	0.0157104	0.0124038	0.00214558	0.0030935	0.0178398	0.0374727	0.0459592	0.0683734	0.217914	0.231432	0.0383055	0.0273438	0.0244168	0.0408768	0.0891616	0.165498	0.016404	0.0563683	0.098408	0.139598	0.0581164	0.0977742	0.0177513	0.0592054	0.0404783	0.120585	0.158667	0.0281436	0.0393866	0.0181746	0.0851946	0.0200013	0.0135378	0.00770353
fraction	K00097	betA, CHDH; choline dehydrogenase [EC:1.1.99.1]	0.000624238	0.00306562	0.000590194		0.00835905		0.00956656	0.00369071	0.000486657	0.00175229	0.00123521	0.0014329		0.000253073	0.00120001	0.000192979	0.00220021	0.000544004	0.00855372	0.00869871	0.016832	0.00327406	0.00440802	0.00688553	0.00167648	0.000699375	0.0224072	0.00344289	0.00210123	0.00273812	0.00204812	0.0168092	0.0235944	0.00363362	0.00069328	0.00079751	0.00165586	0.000699062	0.00194946	0.00306991	0.00136811	0.0049614	0.000197562	0.000330239
fraction	K00108	glpA, glpD; glycerol-3-phosphate dehydrogenase [EC:1.1.5.3]	0.00167703	0.00139831	0.0038764	2.77957e-05	0.000796001	3.14401e-05	0.000596822	0.0061272	0.04449	0.00130153	0.00435839	0.00232263	0.0145337	0.000616209	0.000309104	0.000346579	7.83121e-05	0.00252766	0.00119208	0.00320884	0.0175466	0.0296704	0.0323507	0.00287507	0.0145918	0.00306766	0.0028129	0.00697567	0.00979963	0.00428869	0.00622918	0.00199126	0.0118908	0.00866411	0.00289927	0.00336063	0.010099	0.00689377	0.00685116	0.0121607	0.00555662	0.00089034		0.00037474
fraction	K00111	exaA; alcohol dehydrogenase (cytochrome c) [EC:1.1.2.8]	0.12872	0.0391496	0.0322542	0.00519518	0.0106919	0.00563338	0.0155758	0.0278064	0.00359641	0.0154838	0.00159254	0.00722541	0.0324305	0.0429254	0.026176	0.00201644	0.023797	0.00255474	0.00428144	0.0832901	0.000778514	0.013567	0.00725948	0.00110767	0.000811595	0.0014738	0.00962282	0.000410216	0.000802935	0.000615232	0.0014634	0.00797078	6.22684e-05	0.000616258	0.00429046	0.00490497	0.00254124	0.00102842	0.000284083	0.000743531	0.00245266	0.0334136
fraction	K00114	gcd; quinoprotein glucose dehydrogenase [EC:1.1.5.2]	0.272975	0.24713	0.170908	0.166177	0.131587	0.159679	0.32968	1.0458	0.721959	1.02861	0.750164	0.338122	0.214211	1.67041	0.34118	0.148837	0.136172	0.811641	1.37122	0.685752	0.0506171	0.0593915	0.0613463	0.21355	0.118909	0.339683	0.0846393	0.120833	0.26806	0.0433469	0.0730169	0.227751	0.317645	0.174092	0.0657243	0.0379767	0.133474	0.0954201	0.138325	0.173479	0.109856	0.0964293	0.00381252	0.0580174	0.0246227	0.014259	0.0108531
fraction	K00117	frmA, ADH5, adhC; S-(hydroxymethyl)glutathione dehydrogenase / alcohol dehydrogenase [EC:1.1.1.284 1.1.1.1]	0.0013757	0.0010536	0.000849889	5.02501e-05	0.000151235	1.74559e-05	0.000418282	0.0026527	0.00673209	0.00335237	0.000868465	0.000324516		0.00438107	0.00371581	1.46938e-05	0.000254396	0.00254669	0.000147399	0.0010731	0.0467673	0.015745	0.0188817	0.0209622	0.0976118	0.0855798	0.0157403	0.0799252	0.0236541	0.00580708	0.0515673	0.00939747	0.173757	0.00411798	0.0174756	0.00294319	0.0442476	0.0412726	0.0640515	0.0541619	0.0122533	0.00738009	1.99765e-07	0.000862943
fraction	K00121	FDH; formate dehydrogenase [EC:1.17.1.9]	0.00126006	0.0061017	0.0257147	0.00066214	0.00024483		0.000988708	0.00271181	8.37332e-05	0.00104332	0.000291515	0.0684345	0.000130479	0.0011068	0.000253546	5.36544e-06	0.00415731	0.00807131	0.000165944	0.00200136	0.0493906	0.0495553	0.0544883	0.0397541	0.0322743	0.0189071	0.0214622	0.0111641	0.064491	0.00131024	0.0700956	0.0205775	0.0232123	0.07775	0.0164489	0.0153896	0.040037	0.0302574	0.0267979	0.0276589	0.0108344	0.0106451	0.00079862	0.00904508	0.00140612	0.000124161	3.7537e-05
fraction	K00122	fdoG, fdhF, fdwA; formate dehydrogenase major subunit [EC:1.17.1.9]	0.000118137	0.000368337	0.00747257		1.76319e-05	2.97506e-05	0.0001862		0.000113657	7.47199e-05	2.77069e-05	6.54883e-05			0.00208033				6.90299e-05	0.000139922	0.0145634	0.00600666	0.00308969	0.016442	0.0145273	0.00548827	0.00117161	0.00414792	0.0293946	0.00067388	0.00296589	0.00325934	0.00633562	7.07096e-05	0.0210645	0.00116678	0.00335346	0.00204216	0.00479272	0.00314091	0.00411817	0.000326085
fraction	K00123	fdoH, fdsB; formate dehydrogenase iron-sulfur subunit	0.00252036	0.00399355	0.00208174	0.000715642	0.00428859	0.000418438	0.00198171	0.0326043	0.00111567	0.0111713	0.0110117	0.0235951	0.00157001	0.00492346	0.00434431	0.000500917	0.0129012	0.0466979	0.00218617	0.003392	0.0642365	0.134322	0.257707	0.16917	0.129119	0.142331	0.142534	0.0891405	0.120118	0.0641727	0.0974421	0.0783409	0.188531	0.225176	0.015606	0.0213896	0.135283	0.070703	0.0772693	0.0910814	0.0995985	0.070203	0.00167064	0.0447761	0.00778954	0.00521988	0.0148058
fraction	K00124	ALDH; aldehyde dehydrogenase (NAD+) [EC:1.2.1.3]	0.000854035	0.000389048	0.00130521		0.0107513	0.00204669	0.000485181	0.0153891	0.000166296	0.0614274	0.00825738	0.0929716	0.0626578	0.00508385	0.00187982	0.00172492	0.0131528	0.0108002	0.000845259	0.000712708	0.295706	0.0885495	0.0743701	0.247122	0.357377	0.132588	0.18071	0.190525	0.0829005	0.089469	0.231297	0.031825	0.036779	0.0193505	0.0146335	0.0338874	0.114406	0.0700011	0.149687	0.093376	0.0799157	0.1809	0.00355045	0.0132448	0.0121736	0.00125594	0.00356206
fraction	K00128	ALDH3; aldehyde dehydrogenase (NAD(P)+) [EC:1.2.1.5]	0.0717594	0.273825	0.15683	0.138843	0.0749253	0.0678214	0.0898039	0.693549	0.00794637	0.0510385	0.124087	0.135769	0.219061	0.0384808	0.0748683	0.0258645	0.0741837	0.407457	0.0996291	0.14791	0.0273133	0.252307	0.214538	0.0932681	0.12369	0.172894	0.105526	0.0509464	0.203891	0.059278	0.0967351	1.78046	0.633146	0.10883	0.107924	1.40893	0.322988	0.217637	0.0676046	0.0665122	0.0772963	0.15118	0.00979536	0.145564	0.0875209	0.0110908	0.00516926
fraction	K00129	betB, gbsA; betaine-aldehyde dehydrogenase [EC:1.2.1.8]	0.000154126	0.000195779	0.0414832	0.0670939	0.0177495	0.000520073	0.00103866	0.00665541	3.57608e-06	0.00208553	3.97486e-05	0.00853866	0.0826777	0.000286613		1.20912e-05	0.033468	0.00434295	7.46442e-05	4.14246e-05	0.0012204	0.007625	0.00510776	0.0111644	0.0203582	0.0172261	0.0105375	0.00696509	0.0651358	0.00309421	0.00874502	0.4311	0.0288253	0.00539693	0.0280262	0.552354	0.0743906	0.0406682	0.0106224	0.0149446	0.0102142	0.00501566	0.000813919	0.00171813	0.00117122	0.00141175
fraction	K00130	asd; aspartate-semialdehyde dehydrogenase [EC:1.2.1.11]	0.000377093	0.000830499	0.00424848	0.000134354	0.000687066	0.00032138	0.00353748	0.00459188	6.18246e-06	5.73886e-05	0.00127107	0.00182569	0.001314	0.00466405	0.000190719	0.000409428	0.000147698	0.00256305	0.000195467	0.000461879	0.0470154	0.211444	0.0931343	0.0147035	0.0115993	0.00678864	0.00957293	0.0325233	0.0293228	0.00486222	0.0164913	0.0098469	0.0314865	0.00865183	0.00399026	0.0325473	0.0331122	0.0104654	0.011381	0.0113922	0.118518	0.0118682	0.223902	0.219038	0.0451301	0.974436	0.0154835
fraction	K00133	GAPDH, gapA; glyceraldehyde 3-phosphate dehydrogenase (phosphorylating) [EC:1.2.1.12]	0.00788368	0.0410311	0.0341618	0.0963788	0.139551	0.428847	0.0263947	0.0511723	0.00170563	0.0529598	0.0344785	0.0859461	0.062967	0.125345	0.0168755	0.00770627	0.0388511	0.232753	0.03012	0.0320635	0.0571398	0.077091	0.149523	0.0185763	0.037231	0.00770965	0.212766	0.0131256	0.0139602	0.0237906	0.0238796	0.018506	0.0582332	0.0376249	0.0150094	0.231961	0.0606814	0.0605674	0.0212065	0.010135	0.0109938	0.0481669	0.0115635	0.0197291	0.0154283	0.00369765	0.000931541
fraction	K00134	aldB; aldehyde dehydrogenase [EC:1.2.1.-]	0.0965344	0.098924	0.400162	0.0782929	1.29618	0.182557	0.313063	0.155219	0.0556175	0.410352	0.186657	0.200524	0.141448	0.0654442	0.0677025	0.0172921	0.194522	0.239224	0.141416	0.291119	0.514072	1.55634	1.69374	0.200164	0.384729	0.226932	0.212154	0.159065	0.289914	0.393052	1.50471	0.467297	0.974572	0.133072	1.04347	0.353296	0.282809	0.282852	0.382404	0.146165	0.355895	0.331196	0.675547	0.703612	0.447232	0.284086	0.468102
fraction	K00138	mmsA, iolA, ALDH6A1; malonate-semialdehyde dehydrogenase (acetylating) / methylmalonate-semialdehyde dehydrogenase [EC:1.2.1.18 1.2.1.27]	0.0848874	0.124521	0.112083	0.162822	0.167844	0.256356	0.51327	1.37535	0.23482	0.377365	0.203776	0.179552	0.132647	0.432936	0.254219	0.330759	1.18174	0.572411	0.854654	0.432873	0.214704	0.548329	0.502719	0.185373	0.188219	0.265781	0.148808	0.101514	0.365787	0.0491469	0.206457	1.12557	0.879846	0.172967	0.098756	0.135704	0.109755	0.0672427	0.130012	0.101441	0.240498	0.170713	0.0261743	0.116824	0.0758929	0.0682662	0.0138296
fraction	K00140	xylC; benzaldehyde dehydrogenase (NAD) [EC:1.2.1.28]	0.272041	0.278035	0.101122	0.00549963	0.00894993	0.000125776	0.0247865	0.047926	0.0188359	0.060029	0.00946779	0.0263517	0.0546879	0.0143651	0.064548	0.00415148	0.0851767	0.0972421	0.0267809	0.0149994	0.0157595	0.0859932	0.091027	0.0190864	0.0204551	0.0173611	0.00987439	0.0106154	0.0181889	0.00137787	0.0110591	0.018855	0.0339463	0.0207786	0.0206967	0.00777846	0.0256026	0.0196836	0.0291466	0.035726	0.00812636	0.0229105	0.000526147	0.0101357	0.00147539	0.0109225
fraction	K00141	argC; N-acetyl-gamma-glutamyl-phosphate reductase [EC:1.2.1.38]	0.000572735	0.00078767	0.000243777	0.00121181	0.0024183	0.000411941	0.000505813	0.00100482	3.96576e-05	9.18446e-05	0.00628589	0.00175597	0.0128953	0.000161911	0.000376684	2.36452e-05	0.000919838	0.000102848	0.00221532	0.00329345	0.00100719	0.0172713	0.0273487	0.000808169	0.00482666	0.0017577	0.000937841	0.0017804	0.00168475	0.00109139	0.00557263	0.000430743	0.00799378	0.000543747	0.000788106	0.00162555	0.000446151	0.00177255	0.00092497	0.00054346	0.000351338	0.00227999	0.000221182	0.0270012	0.00377556	0.000245106	0.000363758
fraction	K00145	feaB, tynC; phenylacetaldehyde dehydrogenase [EC:1.2.1.39]	0.00333996	0.0061905	0.00183874		0.000841684		0.0639077	0.0786215	0.000954728	0.0176337	0.000673632	0.00124745	0.0357973	0.00801793	0.000434722	0.000150986	0.000509455	0.1669	0.0357095	0.0263689	0.00467042	0.024966	0.0356457	0.00988683	0.0118443	0.0098524	0.00200967	0.0027276	0.00422307	0.000429054	0.00829931	6.73166e-06	0.0076067	0.00153863	0.00493031	0.00534499	0.0160795	0.012105	0.00709922	0.000927681	0.00532871	0.0431956	0.000186732	0.00178489	0.00100507	0.00116798	0.000333934
fraction	K00146	proA; glutamate-5-semialdehyde dehydrogenase [EC:1.2.1.41]	0.00658163	0.00190298	0.00250021	0.000824892	0.0014963	0.00197318	0.00099949	0.0151227	3.30904e-06	0.000339667	0.00513817	0.00987592		0.000321606		0.000895378	0.000208358	0.00290372	4.22406e-05	0.000702718	0.00443164	0.0085225	0.011216	0.00216536	0.00335027	0.00385696	0.000277052	0.00288573	0.00331423	0.000237976	0.0190532	0.0288514	0.00782739	0.000955085	0.000712593	0.00428787	0.00256222	0.00282829	0.00430993	0.000591773	0.00148532	0.00563804	0.00033657	0.000710477	0.000484321	0.000583785
fraction	K00147	E1.2.1.68; coniferyl-aldehyde dehydrogenase [EC:1.2.1.68]	0.0165274	0.0472783	0.0253204	0.00254821	0.0232446	0.00108369	0.0251803	0.0162919	0.0637301	0.0261823	0.0170762	0.0130434	0.0239646	0.0136038	0.0157185	0.00435491	0.0078437	0.0368605	0.0372914	0.0382895	0.0144963	0.112489	0.076027	0.0810765	0.0535538	0.080806	0.0182386	0.173484	0.239281	0.0373943	0.0239668	0.132521	0.0069145	0.0225599	0.118655	0.0376653	0.0455935	0.0215576	0.196768	0.149268	0.0438271	0.239707	0.00267929	0.018093	0.0981463	0.00511039	0.00069405
fraction	K00154	PDHA, pdhA; pyruvate dehydrogenase E1 component alpha subunit [EC:1.2.4.1]	0.000113702	0.000620976	0.00262112	0.000630012	0.00173671	0.00135166	0.00126698	0.0108679	2.68058e-05	0.00466331	0.00114259	0.00467481	0.0105632	0.000433973	0.000596826	0.000587259	0.000725499	0.0033629	0.000781636	0.000653979	0.00047707	0.018388	0.0310854	0.00068915	0.000262359	0.000944611	0.00341215	0.0043616	0.00745343	0.00134672	0.00113232	0.0323815	0.00404203	0.00294652	0.00683055	0.0414704	0.00691825	0.00453214	0.00516795	0.00680653	0.00436092	0.0010349
fraction	K00161	aceE; pyruvate dehydrogenase E1 component [EC:1.2.4.1]	0.000751433	0.000315925	8.96988e-05				0.00128918		2.26442e-05					8.37006e-05					0.000795292	0.000387775	0.0763397	0.0299522	0.0479614	0.0176071	0.0046361	0.00854578	0.0516694	0.00609036	0.002867	0.0074642	0.0498624	0.136955	0.0794847	0.240966	0.00329261	0.0399515	0.0160743	0.00469007	0.02647	0.00189783	0.0483714	0.0638144	0.000933067	0.000182286	0.00193968	0.00435695
fraction	K00163	OGDH, sucA; 2-oxoglutarate dehydrogenase E1 component [EC:1.2.4.2]	0.0933445	0.205459	0.092227	0.141437	0.0570728	0.0626844	0.11307	0.0619446	0.018917	0.0722669	0.215996	0.0945021	0.115476	0.0381401	0.0504789	0.0117217	0.037227	0.0447445	0.12749	0.203525	0.178876	0.349347	0.423691	0.0693661	0.07195	0.0826322	0.0384742	0.128244	0.19154	0.0403034	0.0242043	0.0707694	0.12038	0.0330553	0.103682	0.0246487	0.0593122	0.0531978	0.096712	0.193555	0.0696505	0.0417193	0.0060386	0.342576	0.143144	0.0499551	0.00587323
fraction	K00164	BCKDHB, bkdA2; 2-oxoisovalerate dehydrogenase E1 component beta subunit [EC:1.2.4.4]	0.0623002	0.165288	0.0274004	0.103171	0.0422044	0.0224706	0.0417248	0.133791	0.0494715	0.0552787	0.0826219	0.0490572	0.0627213	0.0519717	0.00876905	0.0257033	0.0481752	0.0933979	0.0296167	0.0352745	0.0526797	0.128687	0.166749	0.0198537	0.0252551	0.0174259	0.0254601	0.0261234	0.0774753	0.0149911	0.0122842	0.0682538	0.0341351	0.0213658	0.0194664	0.017834	0.0159858	0.00792615	0.0186448	0.0335116	0.0142557	0.0655064	0.00650858	0.0490512	0.0253109	0.00393766	0.0135369
fraction	K00167	korA, oorA, oforA; 2-oxoglutarate/2-oxoacid ferredoxin oxidoreductase subunit alpha [EC:1.2.7.3 1.2.7.11]	0.00699045	0.0169587	0.0130006	0.0116685	0.00538395	0.00035847	0.0242067	0.0033205	0.000370677	0.00487665	0.00985128	0.0116384	0.00259586	0.0126639	0.0139341	0.000968101	0.00423364	0.00579707	0.00718303	0.00247811	0.00104096	0.0356271	0.029589	0.00174183	0.00605293	0.0139194	0.00175	0.0140074	0.00716278	0.00207832	0.00996884	0.00596789	0.010785	0.00402595	0.032745	0.000527676	0.00169506	0.00464227	0.016768	0.0107974	0.0017128	0.00530804	0.000360774	0.00226954	0.000439679
fraction	K00174	dmsB; dimethyl sulfoxide reductase iron-sulfur subunit	3.59597e-05	0.000181242		0.000142802			4.01664e-05	0.00190298	4.42303e-06			3.14898e-05			0.000100588	1.38043e-05		2.8783e-05	0.000422925	8.23465e-05	0.00171341	0.00535065	0.00303788	0.00385355	0.000996097	0.00106231	3.7108e-05	0.000274202	0.00167936	6.67567e-05	0.000808034	0.00196103	0.00157593	0.000126751	0.000355167	0.000168555	0.0139704	0.0127177	0.000501588	0.000831406	0.00384907	0.000869263
fraction	K00184	fabI; enoyl-[acyl-carrier protein] reductase I [EC:1.3.1.9 1.3.1.10]																					0.00022383	0.000884386	0.00103233	0.00233704	0.00224025	0.0145498	0.00089576	0.000992554	0.00190113	0.00318034	0.000922017	0.000821399	0.00102802	0.0246282	0.000948696	0.00150946	0.0036532	0.00326347	0.00115475	0.0028514	0.000923683	0.0041663	3.51896e-05		0.000432546
fraction	K00208	fabV, ter; enoyl-[acyl-carrier protein] reductase / trans-2-enoyl-CoA reductase (NAD+) [EC:1.3.1.9 1.3.1.44]	0.00181157	0.000647613	0.0512106	3.2985e-05	0.00374473		0.0133212	0.0282574	0.000548644	0.00117753	0.00410769	0.0037335	0.00643776	0.0076665	0.048673	1.6752e-05	0.0055136	0.0222036	0.0177366	0.00811945	0.117984	0.12324	0.185995	0.098695	0.0355386	0.0792584	0.0399223	0.0113787	0.0357666	0.0156156	0.0316892	0.0053723	0.0378118	0.0326362	0.291666	0.261732	0.0634862	0.0361342	0.0338207	0.0139534	0.0563555	0.0749201	0.00576429	0.00335298	0.0419478	0.0263418	0.0135519
fraction	K00209	fadH; 2,4-dienoyl-CoA reductase (NADPH2) [EC:1.3.1.34]	0.000772111	0.00742309	0.00332932	0.000301238	0.00406182	0.00029572	0.0165091	0.00909474	0.00136137	0.00540347	0.00726725	0.014284	0.0020324	0.0210164	0.0102385	0.00153734	0.000174355	0.0093613	0.00873809	0.0184644	0.0535303	0.0784532	0.0694123	0.0096988	0.00520118	0.0061751	0.00167238	0.00955057	0.0145676	0.00145724	0.00428752	0.0482909	0.0642815	0.0230427	0.00768369	0.00115087	0.0195741	0.0148662	0.00933803	0.0112301	0.0178096	0.0305608	0.000378341	0.00866542	0.00197175
fraction	K00219	tyrC; cyclohexadieny/prephenate dehydrogenase [EC:1.3.1.43 1.3.1.12]	0.0192774	0.0969832	0.0501613	0.000980503	0.0136182	0.0758108	0.0249838	0.0219893	0.0666643	0.00637165	0.00366799	0.0133848	0.000943288	0.00713096	0.00551215	0.0280369	0.0025695	0.0041291	0.0371513	0.0514536	0.0310992	0.0250623	0.0366272	0.0115062	0.00441122	0.0191533	0.0135144	0.032584	0.0171274	0.0710295	0.00728291	0.0453778	0.00835392	0.0762727	0.0157504	0.0117709	0.0204486	0.00999292	0.0126332	0.0422849	0.0113546	0.0157598	0.000704167	0.000650618	0.000538187
fraction	K00220	SDHA, SDH1; succinate dehydrogenase (ubiquinone) flavoprotein subunit [EC:1.3.5.1]	0.000248987	6.54425e-06	1.16489e-06	1.63411e-05	1.33236e-05	1.8303e-05	0.000192274	0.00185745	1.59909e-05	0.00119798	0.000242698	7.78262e-05	3.84764e-05	0.000112167	6.58995e-06	2.64306e-06	0.000720207	0.000174302	6.56591e-05	7.51678e-05		0.00404537	0.000251166	0.000156275		0.00104541					0.000638272	0.000286006			0.000380607				0.000137746				9.241e-05	0.0017836	0.00640457	0.000216339	0.00171769
fraction	K00234	sdhA, frdA; succinate dehydrogenase flavoprotein subunit [EC:1.3.5.1]	5.36733e-06	0.00166247	0.000925931	6.75032e-05	0.000650278	0.000102795	0.00169707	0.00249935	2.87315e-05	0.0041654	0.00316402	0.00273318		0.00228572	0.00119925	0.001149	0.00243252	3.28531e-07	0.000505974	0.00106841	0.00142739	0.00804506	0.0153104	0.0074183	0.00310682	0.00270886	0.00524287	0.0012364	0.0390299	0.0114844	0.0015112	0.115702	0.102841	0.0126998	0.0417969	0.000735447	0.0734737	0.0876433	0.00776404	0.00870872	0.010443	0.00162565	0.0148823	0.0221731	0.128575	0.0924184	0.395563
fraction	K00239	sdhB, frdB; succinate dehydrogenase iron-sulfur subunit [EC:1.3.5.1]	0.021781	0.0275041	0.0339864	0.0188261	0.0443108	0.194206	0.0406283	0.249634	0.0205018	0.173309	0.142769	0.177979	0.0891435	0.0508478	0.0550718	0.381139	0.121032	0.225923	0.0204234	0.0429725	0.158466	0.404989	0.500417	0.373707	0.116635	0.236925	0.130225	0.14645	0.610182	0.146836	0.0693096	0.817553	0.702597	0.595525	0.193177	0.0758025	0.595731	0.267874	0.168483	0.352911	0.206729	0.111132	0.024436	0.270865	0.446381	0.246495	0.116841
fraction	K00240	ACADM, acd; acyl-CoA dehydrogenase [EC:1.3.8.7]	0.0577718	0.192839	0.048147	0.012745	0.0205434	0.0129665	0.130358	0.0526007	0.0462858	0.0616754	0.183841	0.140058	0.0674776	0.0262673	0.0536927	0.0057798	0.137862	0.100416	0.14552	0.242967	0.00903228	0.0340582	0.0209118	0.0147362	0.0125119	0.0119095	0.00759257	0.0789237	0.105067	0.00259695	0.0109587	0.270366	0.132459	0.023473	0.045835	0.0175361	0.0231915	0.0123328	0.0471138	0.110518	0.030884	0.0237759	0.0036404	0.0955985	0.115328	0.0139811	0.00745466
fraction	K00249	IVD, ivd; isovaleryl-CoA dehydrogenase [EC:1.3.8.4]	0.737824	0.430286	0.240183	0.010403	0.129145	0.0618902	0.251987	0.0889424	0.317685	0.102817	0.200284	0.170136	0.148082	0.0385236	0.102921	0.015683	0.0256283	0.0598207	0.187084	0.639908	0.0714781	0.103591	0.137942	0.036076	0.044119	0.00865685	0.0212776	0.0510303	0.0599959	0.0111274	0.0535325	0.0319437	0.0535212	0.145447	0.0473939	0.0366347	0.0299931	0.0261065	0.0424659	0.065451	0.0379112	0.0800108	0.00312665	0.0357137	0.00387302	0.00427059
fraction	K00253	DHODH, pyrD; dihydroorotate dehydrogenase [EC:1.3.5.2]	0.0774083	0.179849	0.0333558	0.00862598	0.0464138	0.00237661	0.0604473	0.0287048	0.0048174	0.0115944	0.0124521	0.0365119	0.0288406	0.0593383	0.120201	0.000641057	0.0148024	0.0314882	0.070085	0.0627497	0.0310713	0.137657	0.0912635	0.00820011	0.00437019	0.00468157	0.0590768	0.0219251	0.0123345	0.00652152	0.000707731	0.00123145	0.00177546	0.00790917	0.00123248	0.00227836	0.00287919	4.10288e-05	0.0254916	0.0193358	0.0210029	0.0332798	0.00312605	0.0109507	0.00049057	0.00171156
fraction	K00254	GLUD1_2, gdhA; glutamate dehydrogenase (NAD(P)+) [EC:1.4.1.3]	0.00286359	0.00597778	0.00078625	0.00493312	0.00119529	0.0018199	0.0086737	0.00573136	0.00530909	0.0578816	0.00091973	0.00390838	0.0114042	0.00750117	0.0362383	0.00061815	0.00449192	0.000593751	0.00773334	0.0164035		6.76665e-05		0.000112366		0.000118333	1.11986e-06							7.63791e-05	0.000198822	7.73463e-05	3.24576e-05			0.00025669	1.57418e-06		1.16626e-05		0.000341508
fraction	K00256	E1.4.1.4, gdhA; glutamate dehydrogenase (NADP+) [EC:1.4.1.4]	0.000932103	0.000262394	0.000141567	3.7749e-05	0.000444353	0.000234052	6.47175e-05	0.000118709	6.90301e-06	8.01931e-05	1.18931e-05	0.000346936	0.00062377	3.06158e-05	0.000149815	1.22865e-05	0.000113134	9.15604e-05	0.000118223	0.000115193	0.000467447	0.00205752	0.00222564	0.00302768	0.00182564	0.00069815	0.000330144	0.00241633	0.000382319	0.00306121	0.00230515	0.00419551	0.00612733	0.00356577	0.00105028	0.000549131	0.0306357	0.0194392	0.00115895	0.000608018	0.00149276	0.00283673	0.000975511	0.000514153	0.00303089	0.00110683	0.0011944
fraction	K00261	gltB; glutamate synthase (NADPH) large chain [EC:1.4.1.13]	0.0018824	0.00159835	0.000360614		0.000176759		0.000443465	0.001032	1.36951e-06	3.19091e-05	0.000104912	8.39722e-05		0.000198629	8.00866e-05			0.000452531		0.00040311	0.00559836	0.0101434	0.0121614	0.00834624	0.00676497	0.0109567	0.0367455	0.00709413	0.00331033	0.0111181	0.00671362	0.0142092	0.0100388	0.0116451	0.00350513	0.047905	0.0242044	0.0193026	0.00704252	0.00597942	0.0249009	0.0578564	0.00348279	0.00385419	0.000686089	0.000637029	0.0012781
fraction	K00262	gltD; glutamate synthase (NADPH) small chain [EC:1.4.1.13]	0.0249255	0.0322008	0.00523845	0.0018115	0.00120569		0.00462484	0.0197901	3.37138e-05	0.00924156	0.0100932	0.0148114		0.0155385	0.00335184	0.00061697		0.0183288	0.000362278	0.0107694	1.06413e-05	0.0161222	0.0142361	0.0104079	0.00281584	0.00764285	0.0245023	0.000731772	0.00132866	0.0074118	0.00416855	0.085916	0.00517724	0.00866708	0.00734144	0.0176815	0.0377622	0.0248113	0.00771688	0.0060507	0.018491	0.0265
fraction	K00265	nadB; L-aspartate oxidase [EC:1.4.3.16]	0.20005	0.431092	0.545505	0.0235084	0.205179	0.246228	0.0391487	0.138997	0.0128363	0.0418185	0.0219385	0.116717	0.0456648	0.0498151	0.0298219	0.00564329	0.0340682	0.0498646	0.0691809	0.0644867	0.0473576	0.129334	0.19385	0.0673573	0.0312752	0.0531719	0.0276941	0.0869317	0.137928	0.00855478	0.0229302	0.0892812	0.0439546	0.0491721	0.0537747	0.0111295	0.0449943	0.0265092	0.0848901	0.0990875	0.0193216	0.0275518	5.16326e-05	0.0180112	0.00464885	8.77951e-05
fraction	K00266	GLDC, gcvP; glycine dehydrogenase [EC:1.4.4.2]	0.00446387	0.00912407	0.00492464	0.00020055	0.102509	0.116202	0.0164744	0.028746	0.00213258	0.00949412	0.0053992	0.0578637	0.0439795	0.00226873	0.00375901	0.00299866	0.00813643	0.0184921	0.0131097	0.0124988	0.00430499	0.0613139	0.0658051	0.211489	0.010322	0.0153856	0.0154416	0.0410502	0.0836136	0.0190784	0.0100099	0.0804374	0.207247	0.0136792	0.0254339	0.00202736	0.382098	0.254236	0.0914544	0.0546176	0.00595783	0.00802097
fraction	K00278	gcvPB; glycine dehydrogenase subunit 2 [EC:1.4.4.2]	0.012412	0.0123412	0.00321742		0.00270248	1.72719e-05	0.00169985	0.00399273	0.000482796	0.0183449	0.000649613	0.0051508		0.00270177	3.43045e-05	4.87511e-05	2.9688e-05	0.00139062	0.00215184	0.00202326	0.0342816	0.00403287	0.00576965	0.0498704	0.0148373	0.0414326	0.00287482	0.0125546	0.00724864	0.000487773	0.00959862	0.030225	0.0196004	0.0587111	0.00364064	0.000239124	0.10658	0.047683	0.0234208	0.0138606	0.00662649	0.00105996	0.000338675	0.00157787	0.00394919	0.00620636	0.0181415
fraction	K00281	GLU, gltS; glutamate synthase (ferredoxin) [EC:1.4.7.1]	0.0333088	0.0419208	0.0137702	0.083018	0.0323381	0.0242958	0.0368642	0.0200409	0.00118566	0.0195775	0.0262199	0.0204358	0.0161872	0.00619261	0.011066	0.00363594	0.0212596	0.0103229	0.0154609	0.0103405	0.0450188	0.0666404	0.106319	0.0126053	0.00699109	0.00477177	0.00205891	0.0121074	0.014212	0.00322006	0.00107682	0.0133628	0.0510066	0.035982	0.0149406	0.00145618	0.00840966	0.0102478	0.0128249	0.0217709	0.00178643	0.00245444	0.02158	0.0568755	0.00658195	0.000487058	0.000157365
fraction	K00283	proC; pyrroline-5-carboxylate reductase [EC:1.5.1.2]	0.0328947	0.0408382	0.0283119	0.229068	0.0657863	0.0242958	0.0364931	0.0188414	0.00117882	0.0192362	0.012666	0.0202669	0.0194239	0.00592093	0.0120349	0.0029002	0.0162838	0.010554	0.0147544	0.010995	0.0522253	0.0744005	0.121741	0.0139537	0.00815331	0.0060617	0.00703912	0.0148015	0.015825	0.502094	0.00150613	0.0164546	0.0622774	0.036183	0.0170281	0.00391834	0.0144349	0.013779	0.0142092	0.0226134	0.0145152	0.0248939	0.0174775	0.0475179	0.00602199	0.000461725	0.000157365
fraction	K00284	LYS1; saccharopine dehydrogenase (NAD+, L-lysine forming) [EC:1.5.1.7]	0.0261187	0.0147026	0.254675	2.2732e-05	0.0961761	0.111534	0.00175778	0.0333736	0.000126418	0.00020135	0.00328152	0.059427	0.00631797	0.00801987	0.000109465	0.00284126	0.000174832	0.00297152	0.00301472	0.00609034	0.00420594	0.00788726	0.00776021	0.00316295	0.00085087	0.00122538	0.00130564	0.00304234	0.00402125	0.00110104	0.000628132	0.00636507	0.00488887	0.00298426	0.00162712	0.0658917	0.0111756	0.00738231	0.0024958	0.0037631	0.000219475	0.00477132	0.00190671	0.0037471	0.000474535	0.000153766	1.16341e-05
fraction	K00286	metF, MTHFR; methylenetetrahydrofolate reductase (NADH) [EC:1.5.1.54]	0.001548	0.00873384	0.000348468		0.000841354		0.0114669	0.000341927	0.00123508	0.00423736	0.0026714	0.000925112	0.000905577	0.00636179	0.00149702	0.000209809		0.00221098	0.0105597	0.0220834		6.50926e-06	0.00017169	0.00180115	0.00080032		0.000147852	9.72774e-05	0.000195415	0.000159062	9.31531e-05					0.000106873	2.12264e-05			0.000178403	0.000427138	0.00224713				0.000402201
fraction	K00290	soxA; sarcosine oxidase, subunit alpha [EC:1.5.3.24 1.5.3.1]	0.0102821	0.104019	0.0673319	0.150554	0.0173761	0.000733535	0.0113387	0.0228721	0.0193059	0.0238923	0.0113016	0.00821817	0.00159662	0.00269726	0.00246344	0.00137044	0.00475625	0.0151749	0.0235771	0.0183719	0.0028991	0.033033	0.0314597	0.0153872	0.00125272	0.00457728	0.00301489	0.0336666	0.0342294	0.000950413	0.00933282	0.0300528	0.0435856	0.00989167	0.021624	0.00190262	0.0111329	0.00601136	0.0343339	0.0451578	0.00831542	0.00550221	0.000382396	0.0168844	0.00508433	0.000963947
fraction	K00297	soxB; sarcosine oxidase, subunit beta [EC:1.5.3.24 1.5.3.1]	0.00489253	0.0172935	0.0126637		0.000120949		0.00638788	0.00390466	0.000171634	0.00471211	0.000279709	0.0012348	0.0175056	0.000966987	0.00294579	0.00617731	5.07045e-05	0.0020498	0.00358267	0.00650105		0.00205872	0.00378314				1.37912e-05	9.43305e-06	3.52995e-05	9.32127e-05	0.000111785				9.68514e-05	0.000716842	0.000376651	0.000178665		2.05299e-05	3.22421e-05		0.000466598	0.00884208	8.63823e-05
fraction	K00302	ETFDH; electron-transferring-flavoprotein dehydrogenase [EC:1.5.5.1]	0.00460028	0.000108019	0.00023008	0.0187616	2.23935e-05	3.66591e-05	0.000263289	0.000211769	5.1603e-06	0.000750709	0.000152348	3.66116e-05		0.000153986	0.000600066	0.00477123	2.63207e-05	3.65767e-05	6.16304e-05	0.000206841	0.00100883	0.0104754	0.00348548	0.015656	0.0109859	0.0021001	0.00181764	0.0142324	0.00124671	0.00913106	0.0177078	0.00236596	0.00446041	0.00209543	0.0264655	0.000137791	0.0255951	0.0239697	0.0249907	0.00369161	0.00133312	0.00252375
fraction	K00303	nuoB; NADH-quinone oxidoreductase subunit B [EC:7.1.1.2]																						0.00483289	0.00653658	0.00473896	0.025035	0.00619483	0.000241458	0.00133981	0.00116512	0.000134412	0.00019564	0.0200181	0.00700059	0.000327945	0.00197115	0.000654119	0.0101499	0.0123173	0.0065869	0.000942619	0.00450907	0.000678865
fraction	K00311	nuoC; NADH-quinone oxidoreductase subunit C [EC:7.1.1.2]	0.0123992	0.0557727	0.0132173	0.0876172	0.0104979	0.0156124	0.0167067	0.112502	0.00094783	0.0171142	0.0276905	0.0208901	0.0250634	0.0269327	0.0092047	0.00557773	0.0104391	0.0101962	0.00996477	0.0183678	0.0189739	0.0955347	0.148159	0.0349386	0.038218	0.0368995	0.0195791	0.0421758	0.0542959	0.00229269	0.0141129	0.0358112	0.0312979	0.0369253	0.0270924	0.0185649	0.0410897	0.0368244	0.041106	0.0525025	0.0313662	0.0300073	0.000106467	0.0063129	0.00496323	0.00478148	0.000168726
fraction	K00331	nuoF; NADH-quinone oxidoreductase subunit F [EC:7.1.1.2]		7.48521e-05	9.39284e-05		0.000354508			0.00247003		7.33467e-05	0.000109401	0.00125001		0.00034653			4.21066e-05	0.000920179				0.0637465	0.0383476	0.0259467	0.12132	0.104006	1.23274		0.129134	2.10702	3.2586e-05		0.128405	0.0187881	0.0752803	1.64984	0.125668	0.128705	0.240224	0.0345034	0.333053
fraction	K00332	nuoG; NADH-quinone oxidoreductase subunit G [EC:7.1.1.2]		0.00172348	0.00157742		0.00292179		6.29558e-05	0.00977612		0.00351108				0.000404331			0.0145585			0.000192857	0.000268845	0.000120143	7.16855e-05	0.000133705	0.000229038	0.000196351	0.00294322		0.00026362	0.00431297	2.83379e-05		0.000241958	6.56712e-05	0.000142102	0.00337348	0.000236939	0.000242951	0.000494542	6.45215e-05	0.000947953	0.000504986
fraction	K00335	nuoI; NADH-quinone oxidoreductase subunit I [EC:7.1.1.2]	0.00634944	0.00732479	0.00914957	7.55488e-05	0.00212037	0.000761877	0.00139278	0.01811	0.0175952	0.0124469	0.0157766	0.0059895	0.00505913	0.012221	0.00424128	0.000197831	0.00145003	0.00118083	0.0004068	0.000164843	0.000145128	0.00024709	0.000237797	0.0018666	0.000477385	0.000585766	0.00110287	0.000137306	0.0002916	0.000589673	2.89008e-05	0.000198666	0.000167838	0.000484933	0.000319735	7.82037e-05	0.00293481	0.00189971	0.000236283	0.000577929	0.00134791	0.00441304	9.0655e-05	0.00141845	0.000626947	0.00125358	0.00337271
fraction	K00336	qor, CRYZ; NADPH:quinone reductase [EC:1.6.5.5]	7.28297e-06	0.000168243	0.00157577	1.54961e-05	7.89899e-05	2.0852e-05	0.000200678	0.00805935	2.71865e-05	0.000739647	3.51947e-05	0.00173318	0.00019685	0.00603058	0.000163436	0.000126659	4.97895e-06	0.00179552	0.000326666	0.00049385	0.0178823	0.00800852	0.00773811	0.00216247	0.0408881	0.00779995	0.0056555	0.00220764	0.00181751	0.0182411	0.00246818	0.00364024	0.00696713	0.00338095	0.00146014	0.00128572	0.0133367	0.00552263	0.000215926	0.00232398	0.00375342	0.00235305	0.000841116	0.00191075	0.00107843	0.00010419
fraction	K00338	nqrA; Na+-transporting NADH:ubiquinone oxidoreductase subunit A [EC:7.2.1.1]	0.0107199		0.00967456		0.000464655		0.0023158	0.000410122						4.74468e-05			1.0947e-05	0.000414344	2.83358e-05	3.15903e-06		0.000106883	0.000590516		3.42013e-05		8.57152e-05	7.8352e-05	9.83843e-05	0.000608311	0.000140809	1.55247e-05	0.00216632				0.00148727	0.000199931	4.98438e-05	5.93377e-05	0.0010415	0.000133906				0.00116845	0.0005381
fraction	K00344	nqrB; Na+-transporting NADH:ubiquinone oxidoreductase subunit B [EC:7.2.1.1]	0.0111296	0.097845	0.188959	0.00391008	0.0164917	0.035371	0.0475109	0.0306283	0.0238461	0.0484727	0.111635	0.0288307	0.0237517	0.0227703	0.016188	0.00806779	0.00610346	0.0137564	0.0485785	0.168137	0.0266149	0.0612954	0.0789162	0.0177717	0.0120839	0.00577256	0.0077988	0.0386706	0.0560868	0.00513937	0.00703599	0.0103466	0.0191201	0.0183584	0.0256716	0.0013408	0.0277531	0.0164824	0.0420337	0.0366215	0.0130317	0.00782408	0.00590155	0.0275573	0.0101647	0.00798984	0.00382449
fraction	K00346	nqrC; Na+-transporting NADH:ubiquinone oxidoreductase subunit C [EC:7.2.1.1]	0.0405654	0.0536768	0.0129523	0.0285708	0.020507	0.0411519	0.0692419	0.0836958	0.0135619	0.0423782	0.0851668	0.0310313	0.0492592	0.0829799	0.0657873	0.0114062	0.0070892	0.179741	0.0879255	0.120408	0.0285748	0.151052	0.149445	0.0149603	0.0143461	0.0128737	0.0103945	0.0415524	0.0796135	0.0133743	0.0154559	0.285801	0.11472	0.0600253	0.0259544	0.0156262	0.0144233	0.0129352	0.0318467	0.0340806	0.0748573	0.022984	0.00148983	0.0456366	0.0232166	0.00542856	0.00235967
fraction	K00347	nqrF; Na+-transporting NADH:ubiquinone oxidoreductase subunit F [EC:7.2.1.1]	1.52342	2.49627	5.84316	0.00445998	0.00036952	0.134375	0.187585	5.09	0.00412518	0.0340045	0.0842205	0.227442	0.330253	0.013778	0.00461774	0.00141274	0.0172485	0.767294	0.126574	0.0176042	0.00119771	0.000436534	9.72063e-05	0.000902091	0.000247372	0.000889185	3.38856e-05	0.0500881	0.0148045	0.000725764	0.0058398	0.000375323	0.00649517	0.0110361	0.00338486	3.34052e-05	0.00158392	0.00044331	0.0481283	0.00905945	0.000894855		5.8774e-05
fraction	K00348	nirB; nitrite reductase (NADH) large subunit [EC:1.7.1.15]	0.0142417	0.0122514	0.0133207	0.0143167	0.175636	0.11045	0.0322569	0.0542438	0.0111116	0.0575984	0.0530076	0.0472506	0.102544	0.0495065	0.035448	0.0173157	0.00586169	0.0792254	0.0355655	0.0500236	0.0123054	0.0206827	0.0108923	0.00680764	0.00775531	0.00631843	0.00157734	0.0230959	0.0336489	0.00128362	0.0128996	0.0521094	0.012239	0.00330459	0.0117565	0.00496038	0.00814238	0.00990611	0.0159102	0.0246695	0.0113149	0.00658694	0.000181059	0.0120874	0.0012854	0.000182803
fraction	K00351	guaC, GMPR; GMP reductase [EC:1.7.1.7]	0.10852	0.195475	0.070967	0.193609	0.0632437	0.0139057	0.140672	0.0675048	0.0104079	0.0988981	0.333236	0.194871	0.064412	0.0588345	0.0557431	0.0592517	0.0208113	0.113101	0.181215	0.177701	0.0243996	0.107582	0.0828516	0.0677798	0.0354204	0.0343199	0.0292214	0.115208	0.168842	0.00687744	0.0172916	0.273526	0.0991187	0.0377154	0.0684554	0.0373386	0.0190091	0.0117441	0.0608864	0.143264	0.0650461	0.0581518	0.000174863	0.00892028	0.00215937	0.00355646
fraction	K00362	nirK; nitrite reductase (NO-forming) [EC:1.7.2.1]	0.00216321	0.0022261	0.00312797	0.00533924	0.00590334	0.00016431	0.00831412	0.00327093	0.000450831	0.00347282	0.135632	0.0549804	0.00546246	0.000736066	0.00152962	0.000266713	0.0262068	0.0120026	0.0049379	0.00861997	0.0131064	0.0321729	0.0265225	0.0208973	0.00117944	0.0202168	0.0103448	0.00441263	0.0249196	0.00305827	0.00309154	0.0496148	0.0199385	0.00315807	0.00133617	0.00116229	0.0100518	0.0019374	0.00312924	0.00160582	0.00880889	0.0192109				0.00131943
fraction	K00364	narG, narZ, nxrA; nitrate reductase / nitrite oxidoreductase, alpha subunit [EC:1.7.5.1 1.7.99.-]	0.000296885	2.69587e-05			0.000119356		0.000227998		7.86622e-06	0.000627367		0.00136945	0.00673214	0.000273944	4.13125e-05	5.47857e-05	0.00113122	7.54493e-05	7.30424e-05	0.000142311	0.292978	0.0710523	2.22662e-05	0.0149864	8.44026e-05		0.0186505	0.006091	0.000341922	0.00250647		0.0360296	0.000535886	0.000411206	0.528258	0.247674	1.51065e-05	0.00635986	0.12752	0.00452609	0.00530713	0.000109887	1.78657e-06	1.27176e-06	1.32472e-05
fraction	K00368	narH, narY, nxrB; nitrate reductase / nitrite oxidoreductase, beta subunit [EC:1.7.5.1 1.7.99.-]	0.00278577	7.39939e-05	0.00018841	0.0860356	0.0889129	0.00275325	0.0107257	0.00115554	1.22267e-05	0.000723092	0.00872733	0.000550805	0.016582	0.00407979		0.0149944	0.00124434	0.0177458	0.000497041	0.00111146	0.0541559	0.0230721	0.0211441	0.334763	0.0653673	0.0615088	0.599665	0.123934	0.0538346	0.264101	0.0567631	0.0962434	0.0539607	0.0637215	0.0110068	0.0143344	0.311003	0.271381	0.113245	0.15293	0.834207	0.278028
fraction	K00370	narJ, narW; nitrate reductase molybdenum cofactor assembly chaperone NarJ/NarW	0.00374692	0.00181686	0.000608509	0.00155174	0.0740542	0.00247385	0.00228458	0.0169548	0.000129167	0.0081588	0.00169394	0.038033	0.00121732	0.00710188	0.00502952	0.00126245	0.00229516	0.0173843	0.00334333	0.002566	0.0851738	0.0605611	0.094337	1.66896	0.85119	0.683648	0.492607	0.39842	0.224923	0.0630525	0.238184	0.103961	0.161549	0.118319	0.0705789	0.141822	2.6322	1.91195	0.916317	0.757354	0.359485	0.663525
fraction	K00371	cysJ; sulfite reductase (NADPH) flavoprotein alpha-component [EC:1.8.1.2]				0.000381196	0.0163476	0.000156489	0.000422198	0.00393622	3.46542e-05	0.000225852	0.0159051	0.000650271	0.000798682	0.000598209	0.000404643	0.000338129	0.000141635	0.000706151	5.02834e-05	0.000410893	0.0771101	0.0740552	0.0980241	0.290565	0.0841318	0.0984312	0.47741	0.0828137	0.045172	0.0614095	0.0569331	0.0439972	0.0404849	0.165986	0.00668877	0.0970194	0.524527	0.372502	0.159419	0.127987	0.489306	0.856856		0.000197363		0.000629047
fraction	K00373	cysI; sulfite reductase (NADPH) hemoprotein beta-component [EC:1.8.1.2]	6.0231e-05		0.00038368		0.00752773		1.29987e-05	0.000676244		0.000512112					4.44133e-05				4.50657e-05	1.89566e-05	0.0139616	0.0235019	0.0289826	0.228652	0.358017	0.327281	0.0518741	0.269508	0.157475	0.131215	0.176946	0.0511785	0.0705169	0.0638052	0.00985803	0.0244513	0.288458	0.297204	0.221901	0.254586	0.0134771	0.035285	0.00360005	0.00465655		0.322309	0.0303817
fraction	K00380	GSR, gor; glutathione reductase (NADPH) [EC:1.8.1.7]	0.000385795	0.00328638	0.00200039		0.0053642	2.35802e-05	0.0103635	0.000699853	0.0797464	0.0118463	0.00986274	0.00697165	0.00468809	0.0220933	0.002022	0.000329751	0.011855	0.00857503	0.00853109	0.0288853		0.00411556	0.000118468	0.000156219	0.000125113	0.000141853	0.000677939	0.000366515	0.00185709	0.000188979	0.000731188		6.98531e-05	0.0022519	0.0030206	0.000165447	0.00120029	0.00105035	0.000270368	0.00131485	0.000850985	0.000473994
fraction	K00381	cysH; phosphoadenosine phosphosulfate reductase [EC:1.8.4.8 1.8.4.10]	0.0102455	0.0163518	0.00452989	0.00182063	0.00995856	0.0221602	0.0250022	0.0187761	0.0047015	0.015225	0.0112121	0.0149327	0.0132895	0.0338155	0.00387028	0.000311892	0.00659549	0.00320256	0.017826	0.0380119	0.00399943	0.019819	0.0184867	0.00511574	0.00835466	0.00662602	0.0175762	0.0064445	0.0074704	0.0215699	0.0097881	0.0655461	0.0230211	0.0261813	0.00346662	0.024487	0.00563897	0.00656448	0.006137	0.00912736	0.00213952	0.00512113	0.0234365	0.0165808	0.0119727	0.00384815	0.000474264
fraction	K00383	ccoO; cytochrome c oxidase cbb3-type subunit II	0.0249621	0.0269846	0.018134	0.00206796	0.0123049	0.00133063	0.0168558	0.0106868	0.0348094	0.00372588	0.0518656	0.0356587	0.0328142	0.00217713	0.00863877	0.00198707	0.00780707	0.00407944	0.0143049	0.0360816	0.000237161	0.0426579	0.0655808	0.00602448	0.00811217	0.00751156	0.00205388	0.0120272	0.00511397	8.2432e-05	0.00138525	0.00201634	0.002291	0.0128335	0.0157445	0.00359082	0.00333173	0.000627709	0.0160935	0.0268849	0.00169477	0.00225566	0.00100782	0.00516459	0.000565573	9.09048e-05
fraction	K00390	ccoP; cytochrome c oxidase cbb3-type subunit III	0.000407084	0.000194757	1.34492e-05		0.000192788		0.000265775	0.00169942	5.871e-06	0.000312181	0.00192002	0.000249438	0.000292145	0.000220764	0.000205259	1.46071e-05	0.000569365	0.000266726	7.359e-05	7.014e-05		0.000394657	0.000540663	0.00177537	0.000546975	0.00616124	0.000625751		0.000437047	0.000618495	0.00386389	0.00149329		0.00229905	0.000260145	0.000116605	0.00791078	0.00630523		0.00322546	0.00306402	3.544e-05		1.13812e-05
fraction	K00405	UQCRFS1, RIP1, petA; ubiquinol-cytochrome c reductase iron-sulfur subunit [EC:7.1.1.8]	0.142515	0.0969663	0.0184747	0.00868908	0.0314849	0.170064	0.0753229	0.0827192	0.0204394	0.196501	0.0172966	0.00713845	0.0346681	0.322677	0.0355451	0.00347667	0.00699092	0.0632159	0.0992106	0.0700806	8.82636e-05	0.000564867	0.00118286	0.0108696	0.00171718	0.00287478	0.0159736	0.0350895	0.0603482	0.00244834	0.00521627	0.0474359	0.0419653	0.0253418	0.0112894	0.0048479	0.00958876	0.00572191	0.0209907	0.0245449	0.0252994	0.0279615	0.000443814	0.0405958	0.0528696	0.00636756	0.00263299
fraction	K00406	CYTB, petB; ubiquinol-cytochrome c reductase cytochrome b subunit	0.0858762	0.0489557	0.0220627	0.0493057	0.0473225	0.0274401	0.0227271	0.0948946	0.0439451	0.397875	0.0585249	0.0441145	0.0491177	0.26201	0.0161596	0.0268326	0.312526	0.142705	0.024472	0.0224632	0.00319906	0.00251702	0.00301572	0.00215334	0.00252364	0.00249392	0.000606471	0.00808893	0.0163563	0.000178175	0.000759805	0.0192518	0.00322217	0.00452932	0.00381245	0.00044693	0.00155134	0.00212446	0.00304961	0.00624491	0.000650908	0.000756078
fraction	K00411	CYC1, CYT1, petC; ubiquinol-cytochrome c reductase cytochrome c1 subunit	0.0951914	0.0336443	0.0409965	0.000825338	0.00252167	0.000370683	0.0118585	0.077652	0.0149554	0.0671091	0.0189132	0.0132575	0.0207479	0.0373618	0.0246807	0.00555624	0.0125306	0.0608219	0.0103811	0.017192	0.0170995	0.0209012	0.0191246	0.00323517	0.000639339	0.00103297	0.00291121	0.0271701	0.0911917	0.000591169	0.00460015	0.0033288	0.0161014	0.00699756	0.0184552	0.00324793	0.00564134	0.00223023	0.0122717	0.0517891	0.00598052	0.00691161	0.00156697	0.0131064	0.00537149	0.0032532
fraction	K00412	QCR1, UQCRC1; ubiquinol-cytochrome c reductase core subunit 1	0.132106	0.117898	0.318581	0.003101	0.00609056	0.00502397	0.022427	0.0507978	0.00373012	0.119842	0.0285343	0.0243738	0.0217667	0.0100482	0.0138236	0.00175791	0.00496185	0.0177055	0.0119761	0.0216697	0.00388489	0.0166521	0.0197757	0.0448692	0.0883734	0.0611719	0.0030434	0.0271603	0.0659476	0.00575156	0.0407425	0.0333801	0.0653301	0.0232811	0.0162958	0.0512993	0.0202075	0.00794548	0.0173411	0.0500117	0.0109587	0.00856469		0.00569631	0.014068	0.00198559
fraction	K00413	E1.11.1.5; cytochrome c peroxidase [EC:1.11.1.5]	0.0663806	0.0498564	0.0120179	0.00414375	0.0135192	0.00511255	0.0122533	0.0938698	0.000938247	0.0128924	0.0058384	0.00549297	0.0186805	0.0227371	0.0129536	0.0314485	0.0363796	0.0308109	0.0206915	0.0162183	0.000592585	0.00359509	0.00446414	0.00831083	0.000254865	0.00153024	0.0160254	0.0136249	0.0337143	0.036981	0.00301151	0.416867	0.0132208	0.00688125	0.0120273	0.00716604	0.0140825	0.00713298	0.00904757	0.0177482	0.00777431	0.0175624	0.000832118	0.0171148	0.00833647	0.000575185	0.00155295
fraction	K00414	gpx, btuE, bsaA; glutathione peroxidase [EC:1.11.1.9]	2.05067e-06	5.57018e-06	2.20104e-05				6.70997e-06		2.1958e-06						7.78356e-06				0.000943988	5.1378e-05																							0.00382827	0.0054984
fraction	K00428	dmpB, xylE; catechol 2,3-dioxygenase [EC:1.13.11.2]	9.0316e-05		0.00104157		0.000352071		5.06302e-05	4.53168e-05	1.6672e-06	0.0015096				5.75017e-05		1.53776e-05		0.000369534	1.88569e-05								0.000686918	0.00671287	0.0222257					0.0100108	0.0159234	0.0362868	0.0161723	0.00902807	0.00360175	0.00977492		0.00960181
fraction	K00432	HPD, hppD; 4-hydroxyphenylpyruvate dioxygenase [EC:1.13.11.27]	1.52907e-05	0.102559	0.000868989	0.00330316	0.000102895		0.0527106	0.781215	0.0228412	0.314588	0.0311447	0.184433		0.011313		0.23761	1.75271e-05	0.167618	0.146156	0.381133	0.00291375	0.00478548	0.00178625	0.00209108	0.00456104	0.0019894	0.00316644	0.00255897	0.00571802	0.0039969	0.000213985	0.0516964	0.00663914	0.00364045	0.676022	0.000181126	0.000870308	0.00020897	0.00209436	0.00716332	0.00470753	0.018485		0.000224661	0.000948843
fraction	K00446	sodN; nickel superoxide dismutase [EC:1.15.1.1]		0.00152227	0.00030192		0.00821994		5.64842e-05	0.00342709		0.000986148	0.032056	0.0106265				0.0003564			0.000258331	0.00046683					0.000354388	0.00059436		1.1565e-05		1.80573e-05	0.000354993	0.000785182					4.56281e-05				0.000124533	0.00141581	0.000220854	0.0321503	0.00170361
fraction	K00457	merA; mercuric reductase [EC:1.16.1.1]	0.00811647	0.0320981	0.00686837		8.94928e-05	0.0015917	0.0016461	0.000209302	0.000257465	0.00603459	0.000250367	0.00061441	0.00022089	0.000470378	0.000211327	8.58581e-05		0.000466026	0.00668729	0.00689601	0.0138062	0.00968402	0.0196006	8.86603e-05	0.000218387		8.34192e-05	9.01692e-05	0.000103672	7.17392e-05		0.002877	0.00126082	0.000767183	0.000350936	0.000320337	8.37842e-05		0.000121966	0.000756837	0.000405026	0.00041957	7.30288e-06	0.000287067	6.60462e-05		0.0005404
fraction	K00518	nrdJ; ribonucleotide reductase, class II [EC:1.17.4.2]	0.0279528	0.00401881	0.00780847	0.157908	0.0184176	0.00275519	0.00951861	0.0413872	0.00599751	0.726622	0.0374638	0.295572	0.00677565	0.243915	0.013208	0.0275612	0.294325	0.607064	0.022502	0.0200914		0.366776	0.00584623	0.000526038	0.0177422	0.0050598	0.188983	0.000202297	0.0316007	0.000239037	0.0734638		0.000631029	0.00241766	0.017449	0.413023		0.000177977	0.0124158			0.00104545	0.00186514	0.0077892	0.00589945	0.00730135	0.000113541
fraction	K00520	E1.17.4.1A, nrdA, nrdE; ribonucleoside-diphosphate reductase alpha chain [EC:1.17.4.1]	0.000689035	3.71503e-05	7.12879e-05	6.90929e-05		8.96825e-05	6.34853e-05		2.42078e-07	2.19903e-05		0.00102593	0.000119468	0.00110875		8.16053e-05		0.000461287	4.55448e-05	8.15389e-06		0.00553678	0.00710818	0.00846207	0.00203367		7.67135e-05	0.00563706	0.00427096	0.000191186	0.00976792	0.0015218	0.00415476		0.00468057	0.00125974	0.0014341	0.000582891	0.0190919	0.0075064	0.000206747	0.000107452
fraction	K00524	E1.17.4.1B, nrdB, nrdF; ribonucleoside-diphosphate reductase beta chain [EC:1.17.4.1]																											6.22267e-05		3.03504e-05	2.24116e-05			4.60135e-05	0.000728103	4.09393e-05				1.00517e-05		4.61994e-05		0.000319948	0.00036717		0.00105354
fraction	K00525	fpr; ferredoxin/flavodoxin---NADP+ reductase [EC:1.18.1.2 1.19.1.1]	0.0700777	0.0784531	0.0396841	0.00331479	0.0436796	0.0439827	0.0252593	0.0440234	0.00241677	0.0831594	0.0469564	0.0232576	0.0187785	0.0255911	0.00447979	0.00119968	0.00135554	0.0395987	0.0331224	0.0252418	0.113899	0.130581	0.201272	0.0320817	0.0245322	0.0387303	0.0289315	0.0473455	0.043468	0.00336945	0.0391452	0.133685	0.0576352	0.0265861	0.0421301	0.00805632	0.0649705	0.0347666	0.0438532	0.0475796	0.0209707	0.0236786	0.000318009	0.0557478	0.022661	0.0132362	0.000694348
fraction	K00526	hcaD; 3-phenylpropionate/trans-cinnamate dioxygenase ferredoxin reductase component [EC:1.18.1.3]	0.0550299	0.0635576	0.017328	0.00605108	0.00338086	0.00673248	0.023621	0.0355929	0.00171655	0.649497	0.0054355	0.0145985	0.00307588	0.00976105	0.0238363	0.00227332	0.00223308	0.0115469	0.0489226	0.0680419	0.00618127	0.0827901						0.0264478	0.0236332								0.0252439	0.0117511	0.0128775	0.0219831	0.00613539			0.00138155	0.00108787	0.000331247	0.00143413
fraction	K00528	metH, MTR; 5-methyltetrahydrofolate--homocysteine methyltransferase [EC:2.1.1.13]	7.78912e-05	0.000681619	0.00113497		0.000668019	0.00119467	0.00109774	0.00862963	3.51109e-05	0.000933048		0.00218948	7.72726e-05	0.00937635	5.13936e-05		1.13394e-05	0.00108905	0.00473267	0.000171989	0.00104989	0.00685904	0.0135397	0.00524039	0.00885511	0.00246236	0.0369996	0.00462822	0.0162745	0.00493003	0.00182108	0.0108546	0.00473495	0.00659042	0.00705568	0.011868	0.00549722	0.0102177	0.00391413	0.00534027	0.0665893	0.202048	6.56369e-05	0.000271151
fraction	K00529	metE; 5-methyltetrahydropteroyltriglutamate--homocysteine methyltransferase [EC:2.1.1.14]	5.55112e-05	0.00062837	0.000313155				0.000215649	1.7521e-05	2.29819e-05			0.000264777		1.35154e-06	0.000297359			8.05856e-05		4.1071e-06	0.014312	0.032825	0.0638882	0.00196334	0.00207189	0.000943894	0.00232712	0.0043703	0.000723889	0.00163577	0.00181636	0.017711	0.0167098	0.00302736	0.0131408	0.00228095	0.00285092	0.00236515	0.00685348	0.00134349	0.00150431	0.00537995
fraction	K00548	thyA, TYMS; thymidylate synthase [EC:2.1.1.45]	0.0335674	0.00853583	0.0118343	0.0303996	0.000825933	0.225768	0.0204633	0.0141893	0.00223103	0.0879407	0.00512363	0.041923	0.0148647	0.00186219	0.0406515	0.000201107	0.00892696	0.0172427	0.019154	0.0232785	0.000444391	0.0203331	0.0414561	0.011721	0.0158917	0.0143614	0.217888	0.0218674	0.0582775	0.587617	0.00459592	0.0115738	0.00224361	0.00163711	0.127788	0.321133	0.0165625	0.0119916	0.00319491	0.00185177	0.00387886	0.00888292	0.00132603	0.00932771	0.00310025	0.000703785	0.00181256
fraction	K00549	rsmC; 16S rRNA (guanine1207-N2)-methyltransferase [EC:2.1.1.172]	0.00199426	0.000142724	0.000716877		0.00585344		0.00241396	0.00505999	6.14636e-05	0.000522781	2.64487e-05	5.17812e-05	0.0355639	0.00109201	7.27193e-05	0.00371755	0.00419517	0.000152936	0.0010912	0.000619215	0.00914673	0.0283438	0.0765054	0.00313037	0.00205067	0.00244363	0.00494994	0.00132189	0.00139766	0.00148293	0.00548768	0.0184186	0.0151924	0.0297247	0.00281809	0.00379158	0.00321054	0.00155216	0.00133037	0.00177675	0.0178699	0.00218107	0.00236004	0.00156429	0.00186897	0.00155997	0.000653478
fraction	K00560	mnmA, trmU; tRNA-uridine 2-sulfurtransferase [EC:2.8.1.13]	0.175559	0.396981	0.0547061	0.000503224		0.00183106	0.028729	0.00398256	5.42007e-05	0.0260946	0.00229188	0.0830868	0.00484627	0.00285581		0.00121034	0.000413695	0.000803928	0.005454	0.0155165	0.000360628	0.00236977	0.00373344	0.000160157	0.00277568	0.00103595	0.000820676	0.000393952	0.00042455	0.000764041	0.000831006	0.000629353	0.00775818	8.04935e-05	0.00186457	0.000111298	0.000896011	0.000305955	0.00078865	0.00170348	0.000496186	0.00111607
fraction	K00564	ubiG; 2-polyprenyl-6-hydroxyphenyl methylase / 3-demethylubiquinone-9 3-methyltransferase [EC:2.1.1.222 2.1.1.64]	0.00286431	0.00619309	0.00154375		0.000189563		0.00237001	0.0138292	0.000226976	0.00152314	0.00447242	0.00604481	0.00108668		0.00116848		0.00644826	0.000385299	0.00394601	0.00255585		0.00135299	0.00136978			0.00039559		0.00067991	0.00020218						0.00079499			0.000131802		0.000407763			2.10717e-05	1.0229e-05		1.65063e-05	0.00169319
fraction	K00566	E2.1.1.104; caffeoyl-CoA O-methyltransferase [EC:2.1.1.104]	0.00378375	0.00604219	0.00112048	0.00307341	0.000327794	0.000801421	0.00497654	0.0025361	0.0449527	0.000340143	0.00114938				0.000460782	5.91768e-05	0.000760614	0.00281978	0.00476489	0.00517571		0.00106245	0.00126864	0.000604514			2.64546e-05	0.000232241	0.000417116	3.94865e-05	0.000259802	0.000412278	0.00105071		0.000820098	3.90452e-05	0.00123759			0.000954497
fraction	K00568	MTFMT, fmt; methionyl-tRNA formyltransferase [EC:2.1.2.9]	0.00238624	0.00114763	0.000996447	1.34085e-05	0.0013578	0.000491042	0.000614705	0.000533454	0.000149137	0.000258559	0.00649146	0.0116687	0.0142436	0.000751561	7.38071e-05	0.000405408	0.00502896	0.00559387	0.00163594	0.00237379		0.00118281	0.000605108	0.000128906			0.000389335			1.25618e-05	0.000203598				0.000749055	0.000110862	0.000244845	0.000130687	4.45275e-05					0.000980883
fraction	K00588	gcvT, AMT; aminomethyltransferase [EC:2.1.2.10]																							7.22467e-05					4.44093e-05									0.000104915			4.79979e-05			0.000289505	0.00018902		0.0032623	0.000455679
fraction	K00604	OTC, argF, argI; ornithine carbamoyltransferase [EC:2.1.3.3]	0.0535392	0.0532603	0.0126375				0.00782301	0.000286328	0.000708004	0.0209375				8.46035e-05	0.000104941		0.000601624	0.000154011	0.0120936	0.0305016																							2.65367e-06	0.000397246		7.41499e-05	0.000247754
fraction	K00605	E2.2.1.1, tktA, tktB; transketolase [EC:2.2.1.1]	0.00712609	0.0221237	0.00638833	1.51501e-05	4.86431e-05	0.00364718	0.0161645	0.00624011	0.000502228	0.000822454	0.0061174	0.00897101		0.00636422	0.0441637	0.00325227	0.00296725	0.00846955	0.00931177	0.0143453	0.0463093	0.0895353	0.140173	0.0439789	0.02197	0.0207027	0.0684898	0.0335581	0.0296075	0.00336432	0.120172	0.23385	0.129516	0.10988	0.080498	0.0654543	0.155736	0.120735	0.0850042	0.0488655	0.0727143	0.0966281	0.000575604	0.00205763	0.00251113	0.000955518	0.0017718
fraction	K00611	E2.2.1.2, talA, talB; transaldolase [EC:2.2.1.2]	0.0263229	0.0316886	0.00706056	0.00708199	0.00622394	0.0207207	0.0172548	0.0067148	0.00775378	0.0115986	0.00545022	0.00383241	0.00574773	0.00982773	0.00488449	0.00151001	0.0191447	0.0124307	0.0231027	0.0372849	0.0025371	0.0180371	0.0103168	4.23537e-05		5.27628e-06	0.00725988	0.000472929	0.00264245	0.000781444	0.0020558		0.00111674		0.00527332	0.00165934	0.000342238		2.49836e-05	0.00349328	0.00758099	0.000151877	2.53522e-05	0.0128968	3.19777e-05
fraction	K00615	argJ; glutamate N-acetyltransferase / amino-acid N-acetyltransferase [EC:2.3.1.35 2.3.1.1]	0.0137145	0.0275473	0.0101539	0.0273415	0.0237931	0.00415541	0.0250708	0.0385275	0.0308882	0.219984	0.024001	0.0296832	0.0433889	0.0232317	0.00973484	0.00193243	0.00607657	0.146381	0.0184927	0.0220754	0.0273692	0.0687642	0.0754673	0.0273389	0.190999	0.0365541	0.0402224	0.0642399	0.138261	0.080677	0.249289	0.11487	0.284801	0.103575	0.118132	0.0150963	0.0730454	0.0578222	0.123143	0.0985742	0.0262263	0.0593121	0.0305238	0.0728199	0.0486983	0.0510745	0.0223957
fraction	K00616	pta; phosphate acetyltransferase [EC:2.3.1.8]	0.0852359	0.105364	0.0449231	0.0246056	0.00572052	0.00278516	0.0472319	0.0256316	0.0291096	0.0246121	0.00562425	0.0128312	0.0126619	0.0603774	0.0153843	0.0344711	0.013989	0.036972	0.0824377	0.0736633	0.00556645	0.00914106	0.00848892	0.00484111	0.00104287	0.00124145	0.00589135	0.00600143	0.0620349	0.000726985	0.00694342	0.00868346	0.0295563	0.00723186	0.00549659	0.017982	0.00559688	0.00951453	0.00892331	0.0226352	0.036217	0.0142338	0.0020178	0.0286861	0.00925731	0.00140947	0.00059348
fraction	K00620	ACAT, atoB; acetyl-CoA C-acetyltransferase [EC:2.3.1.9]	4.26534e-05	5.00053e-05	4.54388e-05		0.000528399	1.19798e-05	8.46425e-05	0.0013213	3.02916e-06		0.000145293		0.000666376			3.95553e-05	0.000184652	9.08171e-05	2.43456e-05	2.42916e-05		0.00106079	0.000972662				0.00112816			0.000680974		0.000191564			0.000617261	0.000442331	0.00113835	0.000767172				0.0001046		2.26418e-05	0.000464792	0.000361664
fraction	K00625	DLAT, aceF, pdhC; pyruvate dehydrogenase E2 component (dihydrolipoamide acetyltransferase) [EC:2.3.1.12]							1.43092e-05		1.09335e-06										8.24812e-06	3.18147e-05		0.000235872		8.05312e-05			1.13411e-05	0.000228211	8.59477e-05		0.000135652		0.0110524	0.00192897	0.000363204	4.89479e-05	0.000325894	0.000270244			6.11046e-05	0.000100861	0.000267652	0.0570602	0.0289625
fraction	K00626	plsB; glycerol-3-phosphate O-acyltransferase [EC:2.3.1.15]	0.115789	0.156837	0.0558859	0.0390559	0.0504278	0.0337017	0.284297	0.105016	0.217013	0.0971396	0.13649	0.146939	0.217715	0.0279992	0.120528	0.00843547	0.090828	0.0486272	0.288799	0.833763	0.222028	0.401483	0.320312	0.0890404	0.0702708	0.053049	0.0503444	0.139997	0.17607	0.0340238	0.129407	0.162668	0.143966	0.0337341	0.132823	0.0249746	0.104702	0.0795763	0.171886	0.151795	0.0915273	0.0513853	0.0151754	0.151012	0.0333594	0.0389102	0.0115057
fraction	K00627	fadA, fadI; acetyl-CoA acyltransferase [EC:2.3.1.16]	0.646323	0.215829	0.421245	0.139468	0.0669247	0.242441	0.150708	0.183197	0.010921	0.536724	0.554172	0.199266	0.296522	0.650509	0.126175	0.0645408	0.018204	0.285698	0.088787	0.11765	0.0271536	0.957683	0.562639	0.0779196	0.0984347	0.0641835	0.0460483	0.0763101	0.132249	0.0334105	0.0785978	0.222482	0.22148	0.0218544	0.0893639	0.0505217	0.0871548	0.0522083	0.0443077	0.110614	0.211178	0.218713	0.00057685	0.0649811	0.00372866	0.00149484	0.00293452
fraction	K00631	cysE; serine O-acetyltransferase [EC:2.3.1.30]	0.0231628	0.0209682	0.00899918	0.00859869	0.00131915	0.0120631	0.0050706	0.00865503	3.0839e-05	0.0275624	0.00178616	0.0068472	0.00379403	0.000675333	0.000271696	0.00544108	0.000141802	0.000902376	0.000369894	0.00127409	0.000361644	0.00013055	0.000137027		0.00271726	0.00234653		0.000722504	0.000641145			0.000241161			0.00238642	0.00112746				0.000665176	0.00195246	0.000855249
fraction	K00632	fabD, MCAT, MCT1; [acyl-carrier-protein] S-malonyltransferase [EC:2.3.1.39]	0.0594619	0.095446	0.0352572	0.0384716	0.0189731	0.0256206	0.15671	0.128078	0.0907542	0.0378167	0.122391	0.0264861	0.0923089	0.0131677	0.030318	0.00613264	0.0828346	0.0521696	0.100008	0.214712	0.148876	0.224896	0.217466	0.0838047	0.0487924	0.0350863	0.0444778	0.0928256	0.120702	0.0135065	0.162607	0.138214	0.0464179	0.0349397	0.108956	0.0294413	0.0770599	0.0389069	0.123143	0.104555	0.0994725	0.026279	0.0111504	0.088111	0.0157656	0.0490714	0.0115092
fraction	K00640	fabB; 3-oxoacyl-[acyl-carrier-protein] synthase I [EC:2.3.1.41]	0.0318038	0.0113103	0.0179036	0.00458071	0.0031329	0.000826662	0.0177449	0.0493241	0.0015177	0.0213452	0.00890117	0.049682	0.0292205	0.00678289	0.0137747	0.000318623	0.000709008	0.0096491	0.0306052	0.0273298	0.00222646	0.000837402	0.00202367	0.00691247	0.00831022	0.010238	0.00246717	0.00218408	0.00547858	0.000423966	0.00237776	0.000611577	0.0647372	0.000263804	0.003323	0.00147223	0.0135522	0.0120368	0.00317541	0.0054446	0.00150955	0.00119517	1.42119e-05	0.000151598	0.000161753	2.54421e-05
fraction	K00645	fabH; 3-oxoacyl-[acyl-carrier-protein] synthase III [EC:2.3.1.180]	0.000600214	0.00347778	0.00411924	0.00167861	0.0013226	0.0018351	0.00357041	0.000622062	0.00033395	0.000312058	0.000332068	0.00460732	0.00127833	0.000273138	0.00168865	0.000411433	0.00103546	0.00283633	0.00588216	0.00604376	0.000265043	0.000570758	0.00036955	0.000378807		6.5212e-05	1.54157e-05	4.86331e-05	0.000127726	9.66061e-05	0.000218552	6.41285e-05	8.74134e-05	0.000653933	3.40365e-05	5.58886e-05	0.00218226	0.0015712	0.000353368	0.0013325	0.000152247	0.000569102	0.00282838	0.00156464	0.00230622	0.00215512	0.00336876
fraction	K00647	metA; homoserine O-succinyltransferase/O-acetyltransferase [EC:2.3.1.46 2.3.1.31]	0.016368	0.0579178	0.0170712	0.034632	0.0152232	0.000153532	0.0262216	0.0468507	0.000727853	0.0456248	0.00400981	0.010516		0.0430487	0.00182106	0.00505263	0.0052051	0.0175612	0.0234824	0.0363634	0.0171846	0.134356	0.109831	0.0128734	0.0270575	0.0298184	0.00584331	0.0145693	0.0472694	0.00409443	0.00623437	0.0161281	0.0101918	0.0360455	0.0300932	0.00475627	0.0105391	0.0178328	0.0291529	0.050197	0.0027316	0.0141742	0.00458495	0.0640546	0.0875327	0.000332302	0.0259509
fraction	K00648	plsC; 1-acyl-sn-glycerol-3-phosphate acyltransferase [EC:2.3.1.51]	0.00552515	0.0123452	0.00411616				0.00149383		3.80333e-06	1.18925e-05				0.000686323	0.00117181			0.00134109	0.000690016	0.00167985	0.0034605	0.0106995	0.0108513	0.00436113	0.00328105	0.00484701	0.000385428	0.0224956	0.00308933	0.000307587	0.00317983	0.00360949	0.00399792	0.00103546	0.00180543	0.00345792	0.001716	0.00124269	0.0148603	0.00464003	0.00269885	0.00342073	6.3285e-06	0.000111458	0.000285762
fraction	K00651	DLST, sucB; 2-oxoglutarate dehydrogenase E2 component (dihydrolipoamide succinyltransferase) [EC:2.3.1.61]	8.57757e-05	0.000188432	5.93286e-05		2.98546e-05		0.00193441	1.88614e-05	0.000232759	0.000307179	0.000306682	3.84683e-05		0.000329432	0.000797949			0.0011312	0.0016016	0.00326911									0.00388974						0.00160875					0.00251573
fraction	K00655	dapD; 2,3,4,5-tetrahydropyridine-2,6-dicarboxylate N-succinyltransferase [EC:2.3.1.117]	0.019067	0.0325729	0.022352	0.00519078	0.00117069	7.98895e-05	0.00591101	0.0110776	0.000277163	0.00560392	0.00447215	0.00024282	0.00347432	0.000402838	0.00133025	0.00135987	0.000242189	0.00148301	0.0169281	0.00671665	0.000977886	0.00383297	0.00486334	0.000230835	0.000105977			0.000287036	0.000362436								4.62565e-05		0.000339461
fraction	K00658	lpxA; UDP-N-acetylglucosamine acyltransferase [EC:2.3.1.129]	0.0939984	0.170144	0.199092	0.0182704	0.111855	0.00897693	0.184708	0.226801	0.465581	0.0741191	0.0839027	0.0737464	0.0168641	0.0421023	0.23914	0.0174561	0.0490783	0.126547	0.234731	0.367231	0.182478	0.427111	0.37099	0.0199702	0.0132189	0.0160237	0.0374324	0.0324608	0.0842393	0.0121878	0.0793325	0.0472261	0.0929771	0.0218335	0.0652701	0.0359846	0.0232984	0.015054	0.049134	0.0483845	0.0408674	0.0419699	0.00640196	0.0468533	0.0205221	0.0379678	0.00761042
fraction	K00674	ggt; gamma-glutamyltranspeptidase / glutathione hydrolase [EC:2.3.2.2 3.4.19.13]	0.0517494	0.0477933	0.0962465	0.00265173	0.0956042	0.00601835	0.0963581	0.0538924	0.0148844	0.0365253	0.0251367	0.0449553	0.0210177	0.0517124	0.0428315	0.00372131	0.00151716	0.0558345	0.160887	0.195342	0.0313111	0.0368611	0.0386603	0.0859108	0.0895831	0.0951213	0.0156739	0.223245	0.094214	0.00470655	0.490164	0.0208755	0.0499464	0.0256047	0.0309717	0.00402057	0.080951	0.0607063	0.177719	0.0760329	0.00898251	0.0473481	0.000356366	0.00321854	0.000443977	0.00153973	0.000385135
fraction	K00677	PYG, glgP; glycogen phosphorylase [EC:2.4.1.1]	0.00906956	0.0175996	0.00787764		0.00103011	0.000623193	0.00448881	0.00294157	0.000257621	0.00441336	0.00686139	0.0041354	0.000249034	0.0155501	0.0197488	7.70926e-05		0.00900383	0.0115413	0.00967101	0.00920975	0.0230318	0.011224	0.00905981	0.00814709	0.0131712	0.0154529	0.0238204	0.0297523	0.0386195	0.00420463	0.0868322	0.023009	0.0100878	0.0680795	0.00186007	0.0566928	0.0116914	0.0225691	0.0336137	0.00441506	0.00750918		2.50441e-05
fraction	K00681	E2.4.1.7; sucrose phosphorylase [EC:2.4.1.7]	0.00929293	0.0126784	0.00478835	0.00382657	0.00898791	0.00170519	0.0102525	0.0240807	0.00405405	0.0200014	0.0208431	0.0132141	0.00867515	0.022824	0.00960646	0.00286231	0.0139161	0.014724	0.0203994	0.0273643		0.00137157	0.000670774		0.000344329		8.01634e-06	0.000225822	0.000783375	5.18995e-05	0.000524162	5.59385e-05	0.00420985	0.000174187	0.00125771	0.000661086	0.000402244	0.000108474	1.94001e-05	0.00180993	0.000910016	0.000656654	1.78688e-05	0.000657019	0.00104792	0.000398587
fraction	K00688	SUS; sucrose synthase [EC:2.4.1.13]	0.0853042	0.0791342	0.0544657	0.00162481	0.00408929	0.607352	0.0319822	0.0159937	0.117164	0.0270523	0.0513246	0.0423876	0.000809138	0.0202063	0.0107948	0.000334066	0.0152469	0.0269695	0.045005	0.0471916	0.0100976	0.0105364	0.021765	0.0163221	0.0575672	0.0260304	0.00709795	0.948705	0.0275058	0.00510476	0.0311265	0.00326181	0.0606135	0.0105245	0.018671	0.00304581	0.0207941	0.0106305	0.328129	0.0433878	0.004315	0.0123231	0.00200275	0.0139302	0.00606545	0.00144569	0.00180504
fraction	K00690	otsA; trehalose 6-phosphate synthase [EC:2.4.1.15 2.4.1.347]	0.000268331	0.000250979	2.76628e-05		5.48645e-05		3.76901e-06	5.62142e-05		4.7514e-05	0.000809625				1.17758e-05			0.000136186	3.25189e-05	0.00029715		0.000471193	0.00172456	5.84384e-05	0.000265387		0.000162491	0.000106621	0.000325805	1.10299e-06		0.000157835	0.000131437				0.000270471	0.000367217	3.3827e-05	2.34e-05						1.9066e-05
fraction	K00695	GBE1, glgB; 1,4-alpha-glucan branching enzyme [EC:2.4.1.18]	0.000840895	0.00482847	0.0025863		0.00128091		0.00987267	0.000524735	0.000411263	0.00829508	0.0781005	0.00219412	6.09469e-05	0.000620983	0.0024607	0.00010085	0.000357789	0.00119558	0.0105022	0.0271696	0.00416552	0.00225433	0.00235542	0.000825806	0.000662427	0.00014145	0.000463922	0.000989804	0.000729856	0.000394218	0.00152158	0.000672175	0.00126859	0.00772175	0.00161524	0.00202393	0.000695755	0.000315154	0.00141439	0.00172279	0.00168304	0.000780307	0.000126244	0.000459564
fraction	K00697	glgA; starch synthase [EC:2.4.1.21]		5.46093e-05	0.000733163				6.27344e-05		6.29515e-07	3.97725e-05									1.51862e-05	1.0455e-06	0.0111014	0.00835292			0.00781126				0.00233823			0.00308813							0.00091845
fraction	K00700	deoA, TYMP; thymidine phosphorylase [EC:2.4.2.4]	0.00243932	0.0117985	0.00207476		0.0209079	0.000259792	0.00704786	0.0111642	0.00108227	0.0109538	0.0140843	0.0458241	0.00953591	3.88515e-05	0.00130437	7.00763e-06	0.000463052	0.0285222	0.0099219	0.0115018	0.0127163	0.00380079	0.00480964	0.0118314	0.0116095	0.0108124	0.0248422	0.00368779	0.0238601	0.0370098	0.00475675	0.0153339	0.0092314	0.00419197	0.0129674	0.00349744	0.0116204	0.0110743	0.012948	0.00962173	0.00583495	0.0162899	0.00475288	0.00226934	0.0015705	0.00291463	0.00437797
fraction	K00703	APRT, apt; adenine phosphoribosyltransferase [EC:2.4.2.7]	0.00166677	0.00355875	0.000146799	0.000309546	0.000420361	0.00018432	0.000754319	0.000841913	2.94674e-05	0.000829779	0.00353975	0.000393592	5.47256e-05	0.000626744	0.00355422	1.52294e-06	0.000297463	0.00031745	0.00156618	0.00164033		0.000760546	0.000545792	0.000196321	9.27937e-05		3.96866e-05		0.00099048	3.66822e-05	0.000685604	0.00191694	0.000235084		0.00382812	2.73734e-05	0.000237091	0.00107652	0.000445787	0.00282951	8.83825e-05	2.54864e-05	0.00133645	0.00439701	0.0384433	0.00533422	0.0265038
fraction	K00758	upp, UPRT; uracil phosphoribosyltransferase [EC:2.4.2.9]																					0.00422029	0.00360944	0.00307315																			0.00134599	2.25105e-05	0.000326902
fraction	K00759	purF, PPAT; amidophosphoribosyltransferase [EC:2.4.2.14]	0.0140684	0.0355587	0.030612	0.000284673		0.000633875	0.00906268	0.000138283	0.00231051		0.00227783	0.0566679	0.00231869	0.00125884	0.00382518	0.000128837	0.000995963		0.0209124	0.0490434			2.47355e-05	0.00057335	0.000116171	8.11536e-05	0.000507468	0.00777598	0.00750918		0.00126148				0.000945063	0.000130733	0.00161465	0.000369728	0.00385166	0.0051296	0.00191489	0.00286431	0.000118685	6.60323e-05
fraction	K00761	hisG; ATP phosphoribosyltransferase [EC:2.4.2.17]	0.0436581	0.117331	0.0889959	0.00924067	0.00489614	0.0107623	0.0147548	0.00448149	0.109163	0.00969044	0.0144478	0.01192	0.0192903	0.00935919	0.0261767	0.000579286	0.00855693	0.00309524	0.0446734	0.0595924		0.0107329	0.00402411	0.00342796	0.0104989	0.00388926	0.00491091	0.00515698	0.00610297	0.000349418	0.0129262	0.00919698	0.0128853	0.00242249	0.0139143	0.000854328			0.0097269	0.00988134	0.00153089		0.00072711	0.00237744	0.00363861
fraction	K00764	mtaP, MTAP; 5'-methylthioadenosine phosphorylase [EC:2.4.2.28]	0.0199098	0.151157	0.0338089	0.000377335	0.00259334	0.081419	0.118111	0.0155892	0.202161	0.0208908	0.00243991	0.0207786	0.22182	0.00973018	0.189963	0.00391563	0.000187487	0.16607	0.0373665	0.0561781	0.0115504	0.0413694	0.0408676	0.0255349	0.000863216	0.0209935	0.00514807	0.0892679	0.055345	0.00221737	0.0259402	0.0337115	0.0130799	0.038969	0.0479535	0.00761094	0.0120761	0.00640713	0.0654206	0.067864	0.0276278	0.0112488		0.000176438
fraction	K00765	tgt; queuine tRNA-ribosyltransferase [EC:2.4.2.29]	0.0189709	0.0336869	0.0175307	0.0013499	0.000762275		0.0431742	0.00842879	0.039968	0.0115738	0.0122755	0.0110956	0.00112984	0.00496384	0.0163578	0.000714589	0.00187229	0.00366395	0.0648162	0.0563991	0.00880566	0.0239528	0.0141625	0.00225737	0.0138826		0.000712197	0.0105832	0.0226209	0.00332224	0.000276449	0.00294968	0.00424285	0.0105541	0.00294705	0.00085795	0.00235656	0.000351515	0.0204104	0.00821002	0.0109481	0.00087954	0.00110386	0.0224715	0.00400251	0.0249874	0.00171872
fraction	K00772	metK, MAT; S-adenosylmethionine synthetase [EC:2.5.1.6]			3.83944e-05		0.00155249	0.000467638	7.24297e-05	0.000208221		0.000107438	0.000199547	0.000318481	0.00666062		0.000324112		0.000581272								0.000576123	0.000224771	0.00312217			0.000238564	0.000857189	0.000194506	0.000307679		0.0011492	0.000663558	0.00376796	0.00260208		0.000816868	0.00112221	0.00487104	0.00250156	0.0010758	0.00290011		0.00147291
fraction	K00773	murA; UDP-N-acetylglucosamine 1-carboxyvinyltransferase [EC:2.5.1.7]	0.138001	0.0958978	0.0411732	0.000959281	0.00281198	0.0597245	0.100908	0.0144279	0.223884	0.0151845	0.0248141	0.0901312	0.0191494	0.0165387	0.0662067	0.00511377	0.00290488	0.0117147	0.0972428	0.156418	5.87319e-05	0.00589407	0.00249742	0.000518956	0.000806477	0.00120936	0.00190317	0.00866071	0.00314534	0.00190404	0.00317831	0.0141074	0.0143267	0.00572765	0.00544095	0.000527244	0.00804646	0.00468974	0.00480641	0.00341407	0.00794941	0.00423574		0.00033145
fraction	K00789	ribH, RIB4; 6,7-dimethyl-8-ribityllumazine synthase [EC:2.5.1.78]	0.102761	0.0758611	0.240146		0.141633	0.00200485	0.423345	0.158286	0.00712325	0.372626	0.0230503	0.100057	0.0140733	0.0777768	0.0216858	0.0220938	0.0394229	0.125295	0.10278	0.119851	0.330816	0.355056	0.277134	0.293483	0.139964	0.204258	0.227483	0.282807	0.644632	0.0165336	1.64667	0.26994	0.670734	0.0379723	3.08298	0.237712	0.599022	0.311117	0.521216	0.200574	0.140692	0.0623045	0.0761784	0.0563739	0.0567912	0.319271	0.156142
fraction	K00790	aroA; 3-phosphoshikimate 1-carboxyvinyltransferase [EC:2.5.1.19]	0.00970705	0.0140564	0.00655248	0.00177283	0.00373848	0.00838947	0.00578995	0.0162956	0.00597662	0.00235158	0.0777161	0.00428368	0.0975307	0.00211012	0.000670422	0.000937665		0.00356864	0.00489768	0.0112871	0.000144338	0.00623069	0.00814577	0.00100088	0.0015957	0.000736175	0.000222086	0.000661807	0.00240228	0.000290696	0.000227253	0.000202637	0.000663303	0.00146335	0.00295219	0.00208436	0.00301544	0.00565859	0.00222322	0.00304442	0.00293449	0.000194183		0.000661539	6.63439e-05	3.68872e-05
fraction	K00794	uppS; undecaprenyl diphosphate synthase [EC:2.5.1.31]	0.205865	0.117937	0.0409679	0.0106551	0.0140346	0.0179508	0.0252084	0.108237	0.114551	0.0723468	0.00824831	0.0281035	0.0106024	0.0690433	0.0226234	0.0189531	0.0391178	0.108089	0.0420708	0.0585735	0.000580483	0.002696	0.000353075	0.0002679	0.000135077	0.00152842	0.00155583	0.00752092	0.00775442	0.00190612	0.00496975	0.00976035	0.0270917	0.00492267	0.00944131	2.29242e-05	0.00424771	0.0055626	0.016354	0.0122608	0.00135534	0.000577811	0.00177606	0.0640637	0.0776679		0.00669429
fraction	K00800	aspC; aspartate aminotransferase [EC:2.6.1.1]	0.000600808	0.001885	0.00832247	0.000240461	0.00123099	0.0016004	0.00132362	0.00202383	3.94141e-05	0.0075341	0.00161022	0.000155247	0.000678194	0.00206543	0.000867255	0.000154049	0.00162431	0.00789547	0.00117706	0.00863123	0.0221912	0.00473374	0.00672288	0.00140329	0.000812742	0.00346791	0.000970846	0.00155812	0.0046674	0.00618151	0.0450909	0.00491943	0.00393587	0.00174509	0.0019581	0.000403275	0.000786549	0.000606432	0.0325429	0.00340856	0.00764442	0.00203216	1.92977e-05	0.000115106	0.000105394	0.000117056
fraction	K00806	argD; acetylornithine/N-succinyldiaminopimelate aminotransferase [EC:2.6.1.11 2.6.1.17]	0.00301401	0.0102723	0.00481333	4.09747e-05	0.00215715	0.00548928	0.0235192	0.00381497	0.00055104	0.00212214	0.00349587	0.00058342	0.00382785	0.000843185	0.00389626	0.002004	0.0037087	0.00015118	0.00633314	0.0132241			2.94123e-05			0.000198028			0.000479682		5.46252e-05	0.00494984		0.000230188	0.000947859					0.000719834	0.0001754	0.000507471	7.49979e-05	0.000890811
fraction	K00813	puuE; 4-aminobutyrate aminotransferase [EC:2.6.1.19]	0.0317928	0.0797656	0.0191017	0.00960816	0.00414152	0.0139247	0.115173	0.0253419	0.0315576	0.0683702	0.00698686	0.0108855	0.0225206	0.0122399	0.0187322	0.0039437	0.00438244	0.0177922	0.0728082	0.0730252	0.0347708	0.0495994	0.0336557	0.0035193	0.0105025	0.00412756	0.00667366	0.00737238	0.0129713	0.000571076	0.00915724	0.0121198	0.00492814	0.0320212	0.00523194	0.00390398	0.0027169	0.00650201	0.0109273	0.00984168	0.00989649	0.00858138	0.125423	0.0261513	0.022312		0.00150881
fraction	K00821	E2.6.1.42, ilvE; branched-chain amino acid aminotransferase [EC:2.6.1.42]	0.0467965	0.0976243	0.0440155	0.0204161	0.0127589	0.0034634	0.0242916	0.0182523	0.0103606	0.00806073	0.0189077	0.0163219	0.00670025	0.0339991	0.0062861	0.0073559	0.0123245	0.0262069	0.0422103	0.0553493	0.00937433	0.0357178	0.0166299	0.00160626	0.000611761	0.000983235	0.000887404	0.00831702	0.0142107	0.00136341	0.00718966	0.00771282	0.0163	0.00819446	0.00775663	0.00475461	0.00296269	0.00306743	0.00985211	0.0273611	0.0209727	0.00313657	0.000692784	7.98898e-05	0.000568075
fraction	K00823	AGXT; alanine-glyoxylate transaminase / serine-glyoxylate transaminase / serine-pyruvate transaminase [EC:2.6.1.44 2.6.1.45 2.6.1.51]																					0.00201484	0.0162275	0.0203442	0.000414123	0.000153071	0.00713156	4.46904e-05	0.000190398	0.00380393	0.000231984		0.00166168	0.00285457	0.00533805	0.00224055	0.00019155	0.00041351	0.00287797	0.00107729	0.00205129	6.23224e-05	0.000123631		0.000265296		0.0001033
fraction	K00826	serC, PSAT1; phosphoserine aminotransferase [EC:2.6.1.52]	0.00322879	0.00833937	0.00855125	0.0387075	0.00787883	0.00947523	0.0137487	0.0237934	0.0422418	0.0406928	0.00369459	0.0113643	0.0500712	0.0146123	0.0184614	0.0456607	0.00386743	0.00865473	0.0145187	0.0375179	0.0212552	0.0390979	0.0423047	0.00398286	0.0315967	0.00583557	0.00902807	0.00256142	0.00764714	0.0069192	0.00516973	0.0110005	0.0284576	0.0106284	0.00640787	0.00490176	0.0205755	0.0211601	0.00784828	0.0064247	0.00886512	0.023061	0.000988427	0.00812047	0.0072491	0.000252871	0.00196374
fraction	K00830	tyrB; aromatic-amino-acid transaminase [EC:2.6.1.57]	0.036873	0.117851	0.0713032	0.00808093	0.00478896	0.118109	0.0396739	0.00489449	0.00142598	0.0265354	0.00367894	0.00626948	0.0371331	0.051339	0.00942854	0.00122079	0.0451544	0.00408162	0.0532256	0.0913325	0.0134019	0.0205858	0.0197279	0.0077029	0.0346975	0.0082291	0.00868384	0.00887837	0.00633597	0.00133842	0.0004548	0.0105151	0.071527	0.000989866	0.00654562	0.0095531	0.0170054	0.0125096	0.0150665	0.00268114	0.000227696	0.00393488	0.000718546	0.0087212	0.0266269	0.00217545	0.000914338
fraction	K00831	bioA; adenosylmethionine---8-amino-7-oxononanoate aminotransferase [EC:2.6.1.62]	0.0251626	0.0222892	0.0365674	0.000439319	0.0183196	0.0468728	0.0145474	0.142889	0.00168941	0.0326189	0.00875896	0.0108449	0.0148065	0.0218849	0.0321475	8.2022e-05	0.0158583	0.017476	0.028506	0.0239531	0.0040531	0.00886577	0.00504032	0.00820028	0.0073674	0.00810526	0.00306829	0.00119377	0.0116716	0.00283433	0.00128143	0.00344931	0.00853941	0.00972177	0.00271079	0.00172791	0.0101134	0.0105949	0.00244234	0.00609772	0.00829831	0.00452493	3.45628e-05	0.000505344			0.000489406
fraction	K00832	ectB, dat; diaminobutyrate-2-oxoglutarate transaminase [EC:2.6.1.76]	0.0319396	0.0807616	0.0194456	0.00960816	0.00414152	0.0139247	0.115584	0.0257767	0.0315591	0.0688629	0.00761449	0.0109573	0.0225206	0.0122513	0.0187397	0.00394645	0.00438244	0.0187028	0.0728446	0.0750772	0.0347708	0.0520078	0.0343969	0.00354159	0.0105025	0.00414915	0.0071977	0.00751837	0.0131888	0.000636387	0.00915724	0.0137617	0.00498641	0.0324695	0.00523194	0.00480866	0.00282055	0.0065351	0.0110452	0.010008	0.011533	0.00971681	0.125423	0.0261513	0.022312		0.00150881
fraction	K00833	pucG; (S)-ureidoglycine---glyoxylate transaminase [EC:2.6.1.112]	0.000111922	0.000558081	0.000231669	0.00132101	1.62093e-05	0.00311246	0.000126295	6.59862e-05	8.595e-06	0.000488735		0.00109048	3.1568e-05	3.64252e-06		0.000243681			0.000116132	0.000158908	1.67495e-05	0.00079692	0.0055134		4.48928e-05		0.0010164	3.07049e-05		0.000144233	4.73631e-05	0.00235629	0.000641661		0.00200713	0.000399333	0.000796964	0.000504167		0.000123219	0.00364647	0.00777305	0.000164519				0.00201878
fraction	K00836	astC; succinylornithine aminotransferase [EC:2.6.1.81]	0.0090917	0.000684547	0.00345455	0.000538038	2.30852e-05	0.000876651	0.00145351	0.00253754	5.80612e-05	0.00146632	0.00416076	0.00233426	0.000311288	0.00111168	0.000159762	0.000103896	0.00369162	0.00606818	0.000903964	0.00193597	0.0080154	0.0548567	0.0676982	0.0101652	0.00382118	0.00230264	0.00779384	0.00214518	0.00649422	0.000517173	0.00395588	0.00373374	0.0140624	0.00357356	0.00325707	0.00104298	0.00843066	0.00746192	0.0041044	0.00194687	0.00105032	0.00160033	0.000565997	0.00812283	0.0138165	0.00151469	0.000246586
fraction	K00839	glk; glucokinase [EC:2.7.1.2]	0.0224518	0.0716263	0.0482068	0.00808093	0.00478896	0.118109	0.0239034	0.00417796	0.00100464	0.024448	0.00353275	0.00381405	0.0355077	0.0507223	0.00908895	0.00101944	0.0451544	0.00396155	0.0325231	0.053197	0.00386536	0.011864	0.0064343	0.00135092	0.00676769	0.00160126	0.00683294	0.00155398	0.000734099	0.000244437		5.76026e-05	0.0119834	0.000193072	0.00124103	0.00695463	0.00412399	0.00218951	0.00279247	0.000462772	5.82648e-06	0.0021996		0.00626822	0.0269977
fraction	K00840	pfkA, PFK; 6-phosphofructokinase 1 [EC:2.7.1.11]	0.0457686	0.0960298	0.037293	0.0204161	0.0127589	0.0034634	0.0234887	0.0166659	0.0103462	0.00716432	0.0179107	0.0158562	0.00570211	0.0339935	0.0059939	0.00719319	0.0123245	0.0260723	0.0421658	0.0550021	0.00541772	0.0259259	0.0113707	0.000686248	0.000611761	0.000541457	0.00012519	0.00828358	0.0142107	0.00135065	0.00712531	0.00771282	0.0161042	0.00747224	0.00754083	0.000318118	0.00260446	0.00257882	0.00985211	0.0263004	0.00221736	0.00218226	0.000665382
fraction	K00845	ADK, adoK; adenosine kinase [EC:2.7.1.20]	0.00258203	0.002114	0.00130735		5.05575e-05		0.000435129	0.000272711	4.27565e-06	0.000465955	3.28616e-05	2.17448e-05	3.88616e-05	0.00168615	9.58874e-05	6.66004e-06		0.000564775	0.000764647	0.000689458	0.00398747			0.0142806	0.00964541	0.00785579	0.000928906	0.00636942	0.0120367	8.76896e-05	0.00382987	0.00880268	0.0902191	6.37336e-05	0.0582371	0.000114223	0.00790867	0.00681414	0.0185445	0.0119336	9.29581e-05			7.72458e-05
fraction	K00850	ppnK, NADK; NAD+ kinase [EC:2.7.1.23]	0.00182356	0.0317626	0.00775333	1.59818e-05	0.00176946	0.000170426	0.00287181	0.00281508	0.00384549	0.0303782	0.00121004	0.00640346	0.00487824	0.000365175	0.00215901	0.000673963	6.47436e-05	0.00321017	0.00502967	0.0149377				2.81716e-05			2.6734e-05		0.000195721	1.23666e-05				0.00153357							0.00127178	8.37269e-06	0.00157213	0.000509538	0.000230732	0.000126029	0.00016773
fraction	K00856	udk, UCK; uridine kinase [EC:2.7.1.48]																					0.0182928	0.000809264	0.0088476	0.0299942			0.00175808	0.000132906	0.019658	0.000620593	0.00836806	0.00357828	0.242206		0.0863092	0.0027422		0.0042398	1.00029e-05		0.00060073	7.7192e-05	1.35774e-06	1.32457e-05	8.58332e-06	0.000282706	5.61251e-05
fraction	K00858	aroK, aroL; shikimate kinase [EC:2.7.1.71]	0.000392703	0.000514313	0.000233288		8.87e-05		0.000890842	0.00506687	6.3185e-06	0.000345454	8.17619e-05	0.000505943	8.70723e-05	0.000787866	9.81192e-05	0.00713012	0.000147184	0.00616511	0.00046022	0.000350804	0.00153912	0.01648	0.02437	2.99153e-05	0.00171457	0.00156833	0.000673598	0.00258295	0.00158124		0.0641395	0.00222797	0.00327639	0.00330311	0.0016381	4.64557e-05	0.00948691	0.00835578	0.0137386	0.00282645	2.12264e-06	5.15642e-05		0.00225079		0.001657
fraction	K00876	ackA; acetate kinase [EC:2.7.2.1]	0.00718656	0.0173632	0.00547318	0.00936104	0.00283001	0.0156442	0.00148405	0.000629258	5.12787e-05	0.000311441	0.0022474	0.00103856	0.004633	0.000102655	0.00224848	0.00662882			0.00041212	0.00239497																	0.00189266	0.00023759				0.000310736	0.166439	0.0693467	0.0477402	0.058048	0.329893
fraction	K00891	lysC; aspartate kinase [EC:2.7.2.4]	0.0138155	0.0234987	0.00839056	0.00533168	0.00380021	0.00940762	0.0367629	0.00372511	0.00818081	0.0051751	0.0113718	0.0544446	0.0330121	0.0153566	0.0721252	0.00264177	0.00230218	0.0052036	0.0303375	0.0551384		0.000204894	0.000350333			0.00526558	0.000300656	0.00549097	0.00906063		0.0206461	0.000902303	0.0234126	0.00477999	0.0024852	0.000683994	0.000256825	0.000253076	0.00278543	0.00709595	0.00278976	0.00138333	1.47778e-05	0.0016748	2.70399e-05		4.09158e-05
fraction	K00925	tdcD; propionate kinase [EC:2.7.2.15]	0.00743762	0.00336254	0.0102685	0.0114496	0.0105124	0.0276778	0.00425674	0.336078	0.00686214	0.0131467	0.0105732	0.0112309	0.0613245	0.0131996	0.00289477	0.000992606	0.00634886	0.0397939	0.00255911	0.0055167	0.00420071	0.00257068	0.00114807	0.00846053	0.00206877	0.00648084	0.00361257	0.000598413	0.00292965	0.00019456	0.00375923	0.00754773	0.00374878	0.019	0.000521489	0.000244426	0.00665543	0.000718224	0.00119779	0.00177542	0.00611705	0.00260524
fraction	K00928	E2.7.3.2; creatine kinase [EC:2.7.3.2]	0.0112198	0.0206244	0.00783263	0.000405654	0.0160895	0.00586866	0.00583438	0.0509794	0.000319847	0.020088	0.000105175	0.0055719	0.0309271	0.00248916	0.00667333	0.109891	0.00155885	0.0365542	0.00463242	0.00671005	0.127582	0.142	0.405043	0.0163283	0.0234373	0.0235621	0.0835117	0.00495754	0.0139667	0.00710176	0.00381778	0.0538257	0.0495318	0.0442045	0.005077	0.0647016	0.0303869	0.0185343	0.0134848	0.00837916	0.0224811	0.020483	0.0793041	0.0479359	0.102455	0.0064878	0.029237
fraction	K00932	E2.7.3.3; arginine kinase [EC:2.7.3.3]	0.00587985	0.00253082	0.0101043	0.0110726	0.00826926	0.0270849	0.00398675	0.287509	0.00684871	0.0123289	0.0100577	0.00901006	0.0469381	0.010842	0.0027203	0.000955107	0.00602337	0.0386926	0.00240939	0.00485605	0.00416275	0.000294055	0.000383397	0.00827956	0.00197863	0.00648084	0.00324013	5.44287e-05	0.00109486	0.000187426	0.00317177	0.0065537	0.000684175	0.00705627	3.80509e-06	6.75617e-05	0.00649388	0.000592804	6.87587e-05	0.000286887	0.00396618	0.000250689
fraction	K00933	ppk1; polyphosphate kinase [EC:2.7.4.1]		0.00124739	0.00346451																		0.146386	0.0565292	0.130771	0.184834	0.545236	0.660651	0.0653706	0.212678	0.0701682	0.135239	1.24818	0.18203	0.176098	0.221408	0.581787	0.0386632	0.613707	0.465673	0.06272	0.429029	0.0210948	0.653008	0.0736175	0.0756607	0.0920229	0.111094	0.953481
fraction	K00934	ndk, NME; nucleoside-diphosphate kinase [EC:2.7.4.6]																						0.000278584	0.000203906	0.00231774	0.0022558	0.000704277	0.00476627	0.00116163	0.0018452	0.000215917	0.00037825	0.0042207	0.000208787	0.00164208	0.0336785	0.000144226	0.00116972	0.0013821	0.000788533	0.00079938	0.00105581	0.000417497	0.00617178	0.00601345	0.0232582	0.00402234	0.0059738
fraction	K00937	gmk, GUK1; guanylate kinase [EC:2.7.4.8]	0.0797561	0.150439	0.048708	0.000269204	0.0299408	0.0180181	0.0115252	0.0261466	0.000610802	0.0208905	0.578022	0.273585	0.131926	0.0184258	0.0313394	0.00299992	0.00775842	0.00250191	0.0115256	0.0160325	0.00142487	0.0187729	0.0225717	0.00589025	0.010631	0.0012686	0.000470458	0.0141203	0.0113284	0.00101507	0.00737412	0.00123454	0.00730496	0.00708818	0.0083626	0.00351718	0.00219861	0.00312971	0.0109292	0.0236902	0.00204679	0.00300096	0.000107458	0.0531829	0.0019211	3.66395e-05
fraction	K00940	PRPS, prsA; ribose-phosphate pyrophosphokinase [EC:2.7.6.1]	0.221681	1.14659	0.91319	0.778587	0.0523773	0.239684	2.50878	0.130243	0.625435	0.145937	0.135108	0.0716692	0.420486	1.08052	2.80815	0.0273551	0.0471963	0.230829	0.571711	0.533582	0.0519013	0.0219499	0.0172817	0.0160722	0.0171419	0.0173496	0.0266794	0.0249941	0.071914	0.0478578	0.0870863	0.0262221	0.0235668	0.32927	0.0157881	0.0649552	0.0119005	0.00823386	0.0230972	0.0344351	0.0529435	0.198596	0.305499	0.141087	0.0614662	0.00608371	0.0129753
fraction	K00942	folK; 2-amino-4-hydroxy-6-hydroxymethyldihydropteridine diphosphokinase [EC:2.7.6.3]	0.00718259	0.01349	0.00133046		0.000580561	0.000531627	0.00307957	0.000829586	0.000139377	0.000803444	0.000117407	0.000157229		0.00100795	0.00356264	0.000577862		0.00017918	0.00824459	0.00883262				0.000449773			0.000848368		0.000453485	8.72102e-05				0.000154662	1.47482e-05	0.00131323		0.000279224	4.71892e-05	0.000800769	9.08299e-05
fraction	K00948	relA; GTP pyrophosphokinase [EC:2.7.6.5]	0.277765	0.309456	0.0845069	0.0587113	0.0331528	0.0597469	0.256097	0.0871236	0.0135137	0.0686766	0.0640668	0.111652	0.0378129	0.0343326	0.210424	0.0104284	0.00739132	0.0503122	0.226911	0.293259	0.0400665	0.276705	0.1525	0.0336811	0.0616992	0.0250351	0.22641	0.0649629	0.0813843	0.0174312	0.0770477	0.229695	0.142197	0.0415329	0.104095	0.0336629	0.0506806	0.0481983	0.0434513	0.0674277	0.101904	0.113819	0.00107054	0.0318691	0.0307723	0.013244	0.00675778
fraction	K00950	cysNC; bifunctional enzyme CysN/CysC [EC:2.7.7.4 2.7.1.25]			5.502e-05				0.000122992		2.89374e-06										0.000178349	0.000191175	0.000285998		0.000478094	0.000265515		9.59691e-05	0.000150095	0.000206691	0.000469531	0.0082012		7.46287e-05	0.00128221	0.000506613	0.000418875	4.28193e-05	0.000128531	0.000110512	0.000263294	0.000248542	0.000877055	0.000552293
fraction	K00951	cysD; sulfate adenylyltransferase subunit 2 [EC:2.7.7.4]	0.0384928	0.0648929	0.0187692	0.00251575	0.0021142	0.0108847	0.00472765	0.00322499	0.000955883	0.0272075	0.00277387	0.00788144	0.00170064	0.00233647	0.00153579	8.07526e-05	0.000250145	0.0018482	0.00684542	0.0106517	0.001549	0.00291341	0.00466161	0.000164389	0.00250392	0.00142088	0.000327664	0.0098179	0.00301693	3.84119e-05	0.00449308	0.000900991	0.00401128	0.00218295	0.00383425	0.000197707	0.00154461	0.00106294	0.00247853	0.00250826	0.00168954	0.00167037	0.00170968	0.000411126	0.000222233	1.43904e-05
fraction	K00955	manC, cpsB; mannose-1-phosphate guanylyltransferase [EC:2.7.7.13]	0.0266194	0.0737643	0.0555135	0.0029387	0.0362363	0.00240664	0.147056	0.0374288	0.0140255	0.0302401	0.0146326	0.121635	0.0482332	0.00434364	0.0530929	0.00220195	0.0794721	0.0355591	0.107846	0.176442	0.0266277	0.0233136	0.192751	0.0099062	0.00357048	0.00872173	0.00621676	0.0168376	0.0315416	0.00598664	0.0037831	0.00620651	0.00902481	0.00312532	0.00677491	0.0035491	0.00443736	0.00248087	0.0121254	0.0141591	0.0107268	0.00745359	0.000266591	0.0243953	0.00431717	0.000956164	0.145058
fraction	K00957	glgC; glucose-1-phosphate adenylyltransferase [EC:2.7.7.27]	0.0519314	0.0426947	0.0282642	0.00233139	0.0576087	0.00917259	0.0372317	0.0108243	0.0693867	0.0252719	0.0594229	0.0430588	0.0161668	0.00678435	0.0397414	0.00651557	0.00781139	0.00773257	0.0429232	0.0769532	0.000283824	0.00561166	0.0033875	0.0012729	0.00216245	0.00111003	0.0823243	0.00820413	0.0278458	0.000120369	0.00434487	0.0392461	0.0225078	0.00894767	0.00270726	0.00283101	0.000617527	0.000582734	0.0100745	0.00601467	0.0204394	0.0267229		0.00409297
fraction	K00971	rfbF; glucose-1-phosphate cytidylyltransferase [EC:2.7.7.33]	0.0326498	0.0481033	0.0130248	0.000425143	0.00705184	0.00391058	0.0298734	0.00308134	0.0073621	0.0052714	0.0584161	0.0138847	0.124564	0.00166064	0.00304195	0.00706202	0.0105336	0.00549544	0.0404549	0.0812199	0.00606762	0.0175468	0.0128389	0.0143892	0.0080252	0.00425971	0.00132444	0.0185255	0.0173447	0.000740459	0.00239799	0.0224454	0.004967	0.0185531	0.0104016	0.00112958	0.0274721	0.0294276	0.0310655	0.0168003	0.000698086	0.00649741		0.0124853
fraction	K00975	rph; ribonuclease PH [EC:2.7.7.56]	0.0821398	0.129093	0.0334089	0.00724078	0.00397259	0.00104684	0.0139085	0.00409993	0.000404122	0.00143827	0.0207348	0.0293963	0.0132634	0.00617246	0.00620609	0.00103767	0.00919786	0.0081587	0.0265099	0.0396799	0.00310004	0.0310615	0.0160037	0.0152925	0.00647186	0.0106711	0.00616164	0.0450226	0.0535428	0.00188795	0.0164504	0.0316383	0.027718	0.0162944	0.0479157	0.00654731	0.00959864	0.00460061	0.0395644	0.0593803	0.00636598	0.0293793	0.000599531	0.0095409	0.00574884	0.00172299	0.00365837
fraction	K00978	glnD; [protein-PII] uridylyltransferase [EC:2.7.7.59]	0.000529943	0.000305637	0.000175955				0.000642926	0.01308	0.000673691	3.20948e-05				0.00010856	0.000998574				0.000104147	0.0127602				0.0898075	0.0826532	0.0727942	0.0770924	0.000423558		0.000276672	0.000283022			0.0933319	0.00147731	0.227489	0.294117	0.211105	0.00446682	0.000729469	0.138158	1.24962
fraction	K00989	ppdK; pyruvate, orthophosphate dikinase [EC:2.7.9.1]	0.172804	0.305213	0.117228	8.72026e-05	0.0770004	0.111021	0.134037	0.0332338	0.0234323	0.0850528	0.0721284	0.251997	1.11918	0.125562	0.0342147	0.0099599	0.0628421	0.0938953	0.235847	0.269884	0.070303	0.113965	0.129389	0.191901	0.0104574	0.178556	0.00443032	0.0150854	0.103469	0.0434298	0.0440363	0.064606	0.107313	0.0855855	0.0177639	0.0623818	0.0543846	0.0781605	0.0554657	0.0485035	0.00609405	0.00283902	1.04557e-05	0.10117	0.00135024	0.000475631
fraction	K00990	pps, ppsA; pyruvate, water dikinase [EC:2.7.9.2]	0.0115298	0.0228727	0.00632551		0.00435867		0.00421236	0.0297903	6.82112e-05	0.00905371		0.0103653		0.00197181	0.00217208	3.62498e-05	0.000622531	0.00888513	0.00320067	0.00723786	0.00109108	0.00105073	0.000293143					0.000711027	0.000783787		0.383716	0.00666013	0.00911404	0.0129327	0.0021909	6.50763e-06	0.00157743	0.00173865	0.000917657	0.00439857	0.000460437	0.000654829	1.116e-06	0.00029413
fraction	K01006	TST, MPST, sseA; thiosulfate/3-mercaptopyruvate sulfurtransferase [EC:2.8.1.1 2.8.1.2]	0.00019139	9.14119e-05	0.000738565	0.00151626	0.000116896		3.66942e-05	0.000562574	1.70988e-06	0.000702834	2.55295e-05	0.00149462	7.47554e-05	0.000322963	4.45773e-06		5.4754e-06	0.000584032	6.31528e-05	3.30963e-05	0.000281782	0.00235275	0.00168378	0.00665436	0.00342772	0.0255471	0.00400176	0.00333326	0.00264588	0.000687931	0.00452848	0.000754201	0.00467488	0.00525592	0.00184474	0.00328832	0.0279401	0.0354107	0.00362293	0.00298613	0.00515032	0.00634571	0.00144664	0.00141531	4.9218e-05	0.000306528
fraction	K01007	lip, TGL2; triacylglycerol lipase [EC:3.1.1.3]	0.0138938	0.0393719	0.00891158	0.00808379	0.0179958	0.0164004	0.0567571	0.137126	0.347326	0.0516622	1.01666	0.0290232	0.0474055	0.0250388	0.0408763	0.0159955	0.0551256	0.0582629	0.0783026	0.0467069	0.0182035	0.141651	0.165473	0.0835557	0.0173335	0.0293499	0.01456	0.0258705	0.110051	0.00716151	0.0263105	0.208808	0.060717	0.0186978	0.0330659	0.0195916	0.0375949	0.017896	0.0305962	0.056746	0.031868	0.0592704	0.000669777	0.0144803	0.00393536	0.00033156	0.000375021
fraction	K01011	pldA; phospholipase A1/A2 [EC:3.1.1.32 3.1.1.4]	0.000416977	0.00319952	0.0117543		0.000600848		0.00274881	0.0163325	0.000494911	0.00424127	0.000905714	0.00273933			0.00046936	1.06826e-05	0.000252716		0.00337611	0.00346675	0.000323708	0.0067612	0.0030917	0.000513548	0.00154678	0.0125877		0.00107435	0.000286356	6.96346e-06	4.90044e-05	0.0114714			0.000332391		0.00175293		0.000607166	0.000870262	8.79868e-05		0.000237452	0.000531218	7.63068e-05		0.00038878
fraction	K01046	aes; acetyl esterase [EC:3.1.1.-]	0.00588893	0.00328413	0.000299183	0.000409445	0.0113116		0.00468675	0.00185378	0.000134136	0.00853522	0.00520347	0.000482734	0.00298565	0.000249995	0.00140857	7.85134e-05		0.00149936	0.0018612	0.0152624	0.000914124	0.0070998	0.00877152	0.00997283	0.00532739	0.00380344	0.000489928	0.00101668	0.00299608	1.24385e-05	0.00081458	0.00139118	0.00452549				0.00636995	0.00145161	0.00161108	0.000186815	0.00257314		3.13887e-06	0.000568965	0.00379532	0.000798939	0.000160318
fraction	K01058	gloB, gloC, HAGH; hydroxyacylglutathione hydrolase [EC:3.1.2.6]	0.505775	0.100051	0.0361353	0.0036794	0.00778948	0.0125632	0.00306292	0.0288257	0.02437	0.0219954	0.0549471	0.0438059	0.0123412	0.00765764	0.00209992	0.00212376	0.00975726	0.0117274	0.00343085	0.00667141		0.000360412	0.000189527								0.0012325													0.00775725	0.00118736
fraction	K01066	frmB, ESD, fghA; S-formylglutathione hydrolase [EC:3.1.2.12]																						0.00173754	0.00188339	8.18113e-05	0.000292958	0.000185314	5.94819e-06		4.24757e-05	6.85817e-07			2.34691e-05	9.94877e-06							6.16067e-06	5.71747e-05	0.00018734	0.00213233		0.00182913	0.00136556
fraction	K01069	E3.1.3.1, phoA, phoB; alkaline phosphatase [EC:3.1.3.1]	0.0255481	0.0452678	0.0196526	0.453957	0.00556782	0.00431965	0.00345011	0.00445362	0.000112433	0.0181356	0.0808357	0.0222907	0.00958189	0.047821	0.00269319	0.000809198	0.0103734	0.0018411	0.00626656	0.00617835	0.00392499	0.00915793	0.00501078	0.000811574	0.00123366	0.0010616	0.000181299	0.00373839	0.00414983	0.000654985	0.000520265	0.0020532	0.00395234	0.00295406	0.00238964	8.56629e-05	0.00104715	0.00424508	0.00463908	0.00449096	0.000138612	0.000183575	2.51429e-05	0.00654531	0.00327334
fraction	K01070	serB, PSPH; phosphoserine phosphatase [EC:3.1.3.3]	0.00389214	0.00381964	0.000404459	0.00131703	0.0102245		0.00211878	0.140122	0.000746581	0.0104628	5.00224e-05	0.0152672	0.000812658	0.00971816	0.000718058	0.0204834	0.00182052	0.000516995	0.00138035	0.00987473	0.00838048	0.0183249	0.0161274	0.0021517	0.0104393	0.00260141	0.00906306	0.000161131	0.0101396	0.000446126	0.000956195	0.00826202	0.00864228	0.0146423	0.00488449	6.18603e-05	0.0049866	0.00444558	0.00455169	0.0153443	0.000867253	0.00762058	6.32224e-05	0.00240291		0.000129372
fraction	K01077	E3.1.3.5; 5'-nucleotidase [EC:3.1.3.5]	0.0290211	0.0197536	0.0260705	0.0553911	0.0689583	0.119226	0.017228	0.0248132	0.0640315	0.104322	0.143312	0.0506246	0.201086	0.111961	0.0170672	0.103433	0.250024	0.0649549	0.024941	0.0273618	0.0144373	0.0498994	0.0276145	0.0274718	0.033287	0.0315497	0.00350586	0.11225	0.0973693	0.0055321	0.0629796	0.0624809	0.0382401	0.146392	0.0955233	0.0034493	0.0192697	0.0133334	0.238397	0.230296	0.00524233	0.0106408	0.0017635	0.0407053	0.0117215	0.00277133	0.0055259
fraction	K01079	E3.1.3.25, IMPA, suhB; myo-inositol-1(or 4)-monophosphatase [EC:3.1.3.25]	0.00819064	0.00649681	0.0073387	0.000600179	0.00179171	0.00307862	0.00378899	0.000239454	0.000259899	0.00957262	0.00107353	0.00504288		0.000382435	0.000317265	0.00215065		0.00211688	0.00297323	0.0074375	5.4735e-05	0.00014282	0.000906725				4.91775e-05																	0.000345253	5.88085e-05
fraction	K01081	phoD; alkaline phosphatase D [EC:3.1.3.1]	0.00537396	0.00249956	0.000565622	1.61354e-05	0.00035915	0.00335642	0.000797877		4.02216e-05	2.01753e-05	0.000815712	3.7323e-05	9.38329e-05	4.29797e-05	0.00124733	1.92468e-05	2.30795e-05	0.000132555	0.00942862	0.0228548	0.00137089	0.00442525	0.00652735	0.0246499	0.00925041	0.0117144	0.0155141	0.00942336	0.0100669	0.00226281	0.0101201	0.0199215	0.0179527	0.0477276	0.00470192	0.00548746	0.045294	0.0293597	0.0135751	0.0102429	0.00616024	0.00847742		0.000495124
fraction	K01092	acpD, azoR; FMN-dependent NADH-azoreductase [EC:1.7.1.17]	0.027468	0.0419286	0.00881814	0.00331767	0.0177178	0.0117045	0.00773714	0.0882379	0.000544068	0.0172838	0.0229365	0.015905	0.00318207	0.0154455	0.00192052	0.00421364	0.00816995	0.0336453	0.01498	0.0156705	0.000182851	0.00109847	0.00149787	0.00549672	0.00229427	0.00576726	0.000705979	0.00307101	0.00548287	0.00757805	0.0018019	0.00133463	0.00888116	0.00546809	0.00505009	0.000244689	0.00538996	0.00776796	0.00425951	0.0103078	0.00353683	0.00104664	0.000408	0.000235582
fraction	K01113	cpdB; 2',3'-cyclic-nucleotide 2'-phosphodiesterase / 3'-nucleotidase [EC:3.1.4.16 3.1.3.6]	0.00747445	0.00335804	0.00118197	0.000258156	0.000526767	0.000335086	0.000402208	7.74769e-05	3.14894e-05	0.00124309	0.000462937	0.0178519	0.003248	0.00677662	0.00183346	0.000471648	0.00124123	0.00667875	0.000675449	0.00116498	0.000634957	0.00708306	0.006525	0.0121195	0.00396357	0.000921185	0.000647632	0.00344983	0.0194651	0.000694774	0.00115708	0.00382057	0.00187102	0.0251734	0.00909016	0.000407847	0.0205885	0.00937786	0.0164423	0.0109461	0.00103044	0.00360272		0.000139297	0.000752431
fraction	K01118	E3.1.4.46, glpQ, ugpQ; glycerophosphoryl diester phosphodiesterase [EC:3.1.4.46]					6.11392e-05		0.000560618		0.000647988		0.000158524	0.00386006	0.00201788	0.000104776	0.000365124	0.00019851	0.000341772		0.00934655	0.0114717	0.00102779	0.0106208	0.00223598	0.0030443	0.00329588	0.000270316	0.00337752	0.00223635	0.00907272	0.00112431	0.00444753		0.000201746		0.00634756		0.0053907	0.00110675	0.00979286	0.00746996	0.00280095
fraction	K01119	E3.1.6.1; arylsulfatase [EC:3.1.6.1]							1.0251e-05													1.97428e-05	0.000381476	0.000454596	0.0014575	0.00574846	0.00146909	0.00350621	7.05171e-05	0.000340448	0.000797535	5.78644e-05	0.000478148		0.00058553	0.00111857	6.64296e-05	0.000160309	0.00601407	0.00473176	0.00485198	0.00140631	6.63992e-05	2.12942e-05
fraction	K01126	spoT; GTP diphosphokinase / guanosine-3',5'-bis(diphosphate) 3'-diphosphatase [EC:2.7.6.5 3.1.7.2]		0.000613669	0.000203785	0.00101187	0.00314905	0.000134873	0.00158969	0.00135846	0.000145698	0.000394194				1.15385e-05	0.00370767	0.00343253		0.000250332	0.000567255	0.0583722	5.75264e-05	0.00500445	0.00981957	0.0199322	0.0388243	0.0332726	0.00370138	0.000616617	0.00477088	0.00210534	0.00324086	0.00190517	0.00510255	0.000540568	0.00655599	0.0234224	0.00208977	0.000760823	0.00183846	0.0146221	0.0159346	0.0348429	0.00114202	0.00230031	0.000540838	0.000815445	0.000513475
fraction	K01130	hsdR; type I restriction enzyme, R subunit [EC:3.1.21.3]	0.0055762	0.00382684	0.0130263	0.000393126	0.00144587	0.000539855	0.0127465	0.00377086	0.0129265	0.00142705	0.0160916	0.00111135		0.000155928	0.0281215		9.35115e-05	4.13092e-05	0.00104362	0.00646143	0.00094482	0.00110275	0.0247882	0.00281254	0.00947256	0.012768	0.00894646	0.0034053	0.000369504	0.003167	0.00257322	0.00175047	0.00173273	0.00330892	0.00208374	0.00464572	0.00783883	0.00320384	0.00123595	0.00124994	0.00102111	0.00134962	1.33151e-05	0.000142939	0.000261785
fraction	K01139	AMY, amyA, malS; alpha-amylase [EC:3.2.1.1]	0.0319867	0.0539657	0.0160255	7.40677e-05	0.00191534	0.0056625	0.00413602	0.0020592	0.000520587	0.0259136	0.00246725	0.00525613	0.00143428	0.00215626	0.00134138	4.70677e-05	8.94301e-05	0.00146409	0.00639512	0.0104629	0.00143206	0.00051112	0.000530097		0.000321511	0.000106133	9.34679e-05	0.000540876	0.00193366	3.84119e-05	0.000672317	0.000558082	0.00230646	0.000500281	0.00342227	3.86927e-05	0.000296659		0.000299824	0.00207295	0.000387753	0.00135976
fraction	K01153	E3.2.1.4; endoglucanase [EC:3.2.1.4]							6.74584e-06	7.28226e-05			0.000424177	7.25334e-05			0.000674176						0.0023933	0.0021896	0.00294091	0.00047975	0.000434546	0.000403108	0.000112121	0.000254479	0.000968671	0.00206651	0.000189933	0.00019875	0.00247796			0.00036983	0.000819648	0.00042334	0.000265292	0.000768018	0.000156159	0.0017746	0.000171169	0.000263418	8.94885e-05	0.000824263	3.80293e-05
fraction	K01176	malZ; alpha-glucosidase [EC:3.2.1.20]	0.000126917	3.01106e-05	1.77078e-05				0.00279757		0.0005475	1.068e-05				4.51001e-05	0.00145508				0.00294743	0.000508396	0.00809258	0.00160767	0.00448108	0.00706776	0.000712218	0.00034138	0.0127774	0.00898291	0.00316118	0.0136708	0.00478814	0.0131533	0.0154671	0.00366206	3.89065e-06	0.0155869	0.000920842	0.00141848	0.00805226	0.00508698	0.0057969	0.00849544	0.00144099	0.000723578
fraction	K01179	E3.2.1.25, MANBA, manB; beta-mannosidase [EC:3.2.1.25]																					0.00190995	0.00225218	0.00253648	0.0108091	0.116544	0.00538898	0.00103755	0.0183737	0.0109598	0.000695845	0.00121785	0.00370407	0.00559458	0.00746745	0.00059632	0.000362315	0.0166076	0.104257	0.00447561	0.00433193	0.000840958	0.000888346	0.000270445	0.000904654	3.80389e-05	0.000304155
fraction	K01187	pulA; pullulanase [EC:3.2.1.41]	0.0022132	0.000834227	0.000887289	0.000133067	0.000257857		0.000881262	0.00100152	3.74078e-05	0.00267093	8.36122e-05	0.000128266	0.000393924	0.00532454	0.00050072	9.03604e-06	0.00022295	0.0377595	0.00106851	0.000551946	0.000957539	0.00150313	0.0236637	0.00553996	0.00522425	0.00776578	0.000821275	0.0115876	0.00192658	0.00768383	0.0120535	0.000551849	0.00292801	0.00569046	0.00373932	0.00150866	0.00791062	0.00612801	0.0118029	0.00519365	0.00077456	0.000111244				1.9066e-05
fraction	K01192	FUCA; alpha-L-fucosidase [EC:3.2.1.51]	0.000107866	0.000688695	0.0035187	2.14851e-05	0.000437447	3.70781e-05	0.000789507	5.73246e-05	3.33348e-05	1.52186e-05	1.23959e-05		9.61979e-05	3.07199e-05	8.18917e-05	7.91004e-07	2.75678e-05	8.48431e-05	0.000532715	0.0014438		0.000942383	0.000215067			0.00104387			0.00137728		0.000996988						0.000203873	0.00120381	0.00284439
fraction	K01200	abfA; alpha-L-arabinofuranosidase [EC:3.2.1.55]	0.0594485	0.0340255	0.0414184	0.0248431	0.0209143	0.0249466	0.0478179	0.0130081	0.0621738	0.041532	0.0506674	0.0464124	0.075883	0.0133778	0.012978	0.0033465	0.0087058	0.0266543	0.0196443	0.036877		0.00168715	0.0114605	0.00365899	0.00951537	0.0055468	0.00462579	0.00343896	0.00549965	0.0099661	0.00832512	0.000909157	0.0131164	0.00022341	0.00464016	0.00136258	0.00137728	0.00425135	0.00390797	0.0100198	0.00506362	0.00825407	0.000141455	0.00226772	0.00589186		0.000760905
fraction	K01206	bglS; licheninase [EC:3.2.1.73]																								0.00694979				0.00408493	0.00124927		0.00164432										9.26725e-05		4.0557e-05	9.21554e-05	0.000245859	1.9066e-05
fraction	K01209	gmuG; mannan endo-1,4-beta-mannosidase [EC:3.2.1.78]	0.000121677	7.76419e-05	0.000290213				0.00144821	0.00201101	6.72213e-07										6.38811e-05	0.00078093	0.000147177	0.000184873	7.42921e-05	0.002168	4.58857e-05	0.00127411	0.000184674	0.000248029	0.000100795	8.90813e-05	0.000276249	0.000104372	2.46271e-05		0.000444512		0.00237091	0.00174064	0.000328364	0.000459026	0.000128819	4.58201e-05
fraction	K01216	mtnN, mtn, pfs; adenosylhomocysteine nucleosidase [EC:3.2.2.9]																					0.0012268	0.000324417	0.00043576	0.00673395	0.114824	0.00517838	0.000684235	0.0172946	0.0101153	0.000221634	0.000731596	0.00100177	0.00117584	0.0059877	0.000514164	0.000118833	0.0111463	0.101839	0.00402227	0.00376243	0.000467108	0.000285465		1.31125e-06	3.12702e-06
fraction	K01218	AHCY, ahcY; adenosylhomocysteinase [EC:3.13.2.1]	0.000657335				0.0578469			0.00487996		0.00816005	0.778033	0.219651	0.0182845	0.00169633		0.00556976		0.00591667				9.24691e-05	2.79934e-05	0.00694979				0.00596389	0.00181183		0.00330238		0.000496326	0.000346621	0.000495995		0.000126936		0.00172782	0.000886362	9.26725e-05
fraction	K01243	CARP, pepA; leucyl aminopeptidase [EC:3.4.11.1]	0.019496	0.0237308	0.00210735		0.000185212		0.00633128	0.0114659	0.00801369	0.00411495	0.00128101	0.00902611	0.000735197	0.00628552	0.00306751	0.000386568	5.79096e-05	0.0164162	0.00238795	0.00228461	0.0102184	0.00031498	0.000256634	0.000648718	0.00200202	0.000885381		0.000263027	0.00311776	8.24797e-05		0.00167446	3.87663e-05	0.00469707	0.00423676		0.000717375	0.000264981	0.000274015	0.00609132	0.00111414	0.000721915
fraction	K01251	pepN; aminopeptidase N [EC:3.4.11.2]	0.0129335	0.0199382	0.0565518	0.00993894	0.00342418	0.0121233	0.0367989	0.466553	0.036834	0.0399991	0.0156249	0.0294113	0.0101901	0.035068	0.0866817	0.000756618	0.00838362	0.149982	0.0679732	0.0494005	1.28093	0.269511	0.421674	0.165415	0.168179	0.159059	0.0604507	0.0534907	0.0779864	0.00956443	0.0329364	0.199008	0.109489	0.431894	0.545177	0.0997262	0.248328	0.198812	0.0683343	0.0441576	0.0633019	0.12272	0.0436768	0.119659	0.192495	0.00941125	0.0345944
fraction	K01255	pip; proline iminopeptidase [EC:3.4.11.5]	0.217208	0.104835	0.0349054	0.036922	0.0412313	0.11011	0.0475737	0.0714715	0.0361182	0.159891	0.0533724	0.0551824	0.276777	0.138777	0.122598	0.0064217	0.0334552	0.123456	0.048829	0.072413	0.529092	0.226456	0.124008	0.143301	0.0441509	0.0421831	0.0254898	0.0435604	0.0286077	0.015016	0.0437772	0.216626	0.0631303	0.0321417	0.0326389	0.0261488	0.091186	0.0731058	0.0529271	0.0463248	0.0235016	0.0266142	0.00526549	0.024626	0.0236255	0.0236377	0.00301062
fraction	K01256	map; methionyl aminopeptidase [EC:3.4.11.18]	0.00507214	0.00477835	0.00226617		0.0028756	0.00136721	0.00589758	0.00637255	0.000462823	0.00466792	0.00326045	0.00231175	0.00101766	0.00279812	0.0151301	0.000292598	0.00304064	0.030995	0.00241836	0.00265413	0.00104623	0.105215	0.0740573	0.0272126	0.00842251	0.00889775	0.0188818	0.00291417	0.0020079	0.000482882	0.0366944	0.00354216	0.00371161	0.0292786	0.00606955	0.00117272	0.0408008	0.0394395	0.00924707	0.0127555	0.00566222	0.0273827	4.83869e-05	0.000238437	7.71545e-05	2.34013e-05
fraction	K01259	pepQ; Xaa-Pro dipeptidase [EC:3.4.13.9]	7.8492e-06	0.00147775			5.83396e-05		0.000117646	7.73574e-05	2.2525e-06		0.000555728	0.000550667	0.000457717	0.000215642						7.50255e-05			2.51222e-05	0.010356	0.000747897	0.00120697	0.00055952	0.00134261	0.000379608	8.17025e-06	9.70111e-05		0.000355176	8.94425e-05	0.000158022	0.00201422	0.00669888	0.00393771	0.00132621	0.00152123	5.06677e-05	0.000889006			5.75078e-06
fraction	K01263	DPP4, CD26; dipeptidyl-peptidase 4 [EC:3.4.14.5]	0.0027333	0.00311353	0.000843815		0.00272461	0.00135739	0.00521651	0.0058062	0.000433948	0.00177399	0.00317856	0.00180603	0.00080186	0.00222076	0.0148382	0.000265537	0.00295758	0.0306894	0.00167774	0.00198412		0.000234052	0.000249343	0.00198576	0.000367836	0.00168588	0.00174364	0.00232363	0.000566519	0.000288954	0.000682175	0.000252397	0.00118072	0.00813213	0.00203807	4.99237e-05	0.000591344	0.000611578	0.00303005	0.0078948	0.000788043	0.00138932	6.42414e-06	0.000132466
fraction	K01265	ACE, CD143; peptidyl-dipeptidase A [EC:3.4.15.1]	0.000640845	0.00529004	0.000230726	0.00219361	0.000606482	0.00721809	0.00736458	0.00527472	0.00117415	0.00444543	0.00924835	0.00799158	0.00185033	0.00101488	0.00737949	0.000201028	0.0049448	0.000964861	0.0177571	0.0149618	0.000108852	0.000978508	0.00292265	0.00128918	0.00563681	0.00185407	0.00294468	0.00648965	0.0103092	0.000339666	0.00132231	0.0248937	0.005409	0.0122388	0.0108521	0.000800872	0.0010029	0.00127987	0.00877361	0.0144259	0.00104096	0.00596152					0.000869819
fraction	K01271	dcp; peptidyl-dipeptidase Dcp [EC:3.4.15.5]	0.02506	0.0496407	0.00384881	0.000196926	0.00580649	0.000397963	0.0112779	0.00641423	0.000553941	0.0121835	0.00245625	0.00081758	0.00379118	0.00572291	0.0134111	0.000384444	0.0245848	0.006272	0.00950288	0.0153946		0.00415984	9.54877e-05	0.00339234	0.00121524	0.001897	0.000747678	0.000629969	0.000819817	0.00248405	0.0010408	0.000126766		0.00457143	0.00210071	0.000577721	0.00251739	0.00232148	0.00166987	0.00123142	0.00044745	0.000297188
fraction	K01278	E3.4.16.4; D-alanyl-D-alanine carboxypeptidase [EC:3.4.16.4]	0.0341809	0.0272676	0.0117415	0.00647567	0.011367	0.0109508	0.00797879	0.00777944	0.000490746	0.00250576	0.00878875	0.00221159	0.00207258	0.0072003	0.00438444	0.0012481	0.00077021	0.00783218	0.00726683	0.00804257	0.00377739	0.0014821	0.00124329	0.0111704	0.00376619	0.00596101	0.00134678	0.00504286	0.0091058	0.00833404	0.00232643	0.00293411	0.00848112	0.0106237	0.0076999	0.0227967	0.0123167	0.0074932	0.0104118	0.0180207	0.0044403	0.00428895	1.93691e-05	0.00100259
fraction	K01283	E3.4.17.19; carboxypeptidase Taq [EC:3.4.17.19]	0.0233934	0.0490161	0.0198103	0.00829174	0.0104771	0.0380756	0.0120024	0.0213993	0.00084192	0.069534	0.00652856	0.0698392	0.0081268	0.148031	0.0164709	0.00637166	0.0216505	0.173724	0.0172115	0.0240986	0.00812473	0.0120288	0.00285003	0.0010577	0.00114269	0.00362591	0.000121628	0.00314834	0.00272639	0.000177424	0.00269026	2.00335e-05	0.000812428	0.00464157	0.00637487	0.000171823	0.00329786	0.0030479	0.00155514	0.0034929	0.00929875	0.000157969	2.86987e-05	0.00268226		0.000245234	0.00280738
fraction	K01284	PRSS1_2_3; trypsin [EC:3.4.21.4]	0.0154682	0.0423308	0.0160987	0.00892718	0.0184405	0.00408022	0.019733	0.0326082	0.00248895	0.0419434	0.0573981	0.0938106	0.0440569	0.0686033	0.042525	0.00803172	0.015663	0.125993	0.0246982	0.0273631	0.00129629	0.0210757	0.0148386	0.00385815	0.00336853	0.00337831	0.0117688	0.00479578	0.00630148	0.00335907	0.00284094	0.0161648	0.0169619	0.00480804	0.00669433	0.00794267	0.00524017	0.00332817	0.00660911	0.00791524	0.0177287	0.00495134	0.000471169	0.00775094	1.46902e-05	0.00105466
fraction	K01286	PLG; plasminogen [EC:3.4.21.7]	0.00853194	0.021603	0.00220981	3.52387e-05	0.00185584	0.00132652	0.00247664		0.000736069	0.00544552	0.0159964	0.00248645	0.00535272	0.000853392	0.00159774	0.000245651	0.000837252	0.00878987	0.00459795	0.00739433		0.00163421	0.000740231	0.000110757			1.53697e-05	0.0011879	0.000865196			0.0183758	0.000169114	8.9327e-05	0.000904569		0.00032747	0.000145963	0.00107004	0.000926169				0.000655278		0.000384589
fraction	K01299	ACR; acrosin [EC:3.4.21.10]		0.000142782	0.00187348				0.00050595	0.000135899	2.2084e-05	0.000714859					3.7867e-05	2.22017e-06		0.000145944	0.000483145	2.21681e-05																							0.000445161	7.70931e-05		0.00217723
fraction	K01312	PREP; prolyl oligopeptidase [EC:3.4.21.26]	0.0640687	0.0661015	0.286214	2.69826e-05	0.00167087		0.00350366	0.000692389	0.00075568	0.00110009	0.00603706	0.00114881	0.0116494	0.000171812	0.134314	0.000924507	0.0211822	5.23825e-05	0.00625345	0.0066182	2.73342	0.493498	1.12876	4.48313	0.078405	0.226983	0.141018	0.0106783	0.0108704	0.0900873	0.0118516	0.00459792	0.0106774	0.0196083	0.00369928	0.196551	0.0199809	0.00810934	0.00101608	0.00553591	0.263479	0.478917		0.000338771
fraction	K01315	lon; ATP-dependent Lon protease [EC:3.4.21.53]	0.00061668	0.00201718	0.0316248					0.000319946	1.40714e-05	0.000957436	1.44143e-05	0.000576773						0.00012241		7.24184e-06	0.176654	0.00645913	0.00772643	0.0517961	0.0402573	0.0140397	0.00718914	0.000413996	0.00125556	0.00411833	0.000639429	3.75887e-05	0.000803658	0.0106164	0.0357791	0.00265298	0.00202217	0.00170465	0.00222778	0.000261059	0.00534673	0.0144066	0.000123553	1.1819e-05		0.00070886
fraction	K01317	ptrB; oligopeptidase B [EC:3.4.21.83]			0.000346542							7.8576e-05				1.4016e-05				3.18476e-05		9.46201e-06	2.09918e-05	0.000525559	0.000671832	0.00159562	0.000621616	0.00289307	7.7778e-06	0.000196218	0.000118647	0.000147087		0.00074271	0.000568642	0.000144096	0.000122084	2.42193e-05	0.0031536	0.00190285	9.75288e-05	0.000507819	0.000598588	0.000594511
fraction	K01322	lexA; repressor LexA [EC:3.4.21.88]	0.00470178	0.00632576	0.015447		0.00153988		0.0033678	0.00109019	0.000233821	0.00378479	0.00202757	0.00113247	0.00230919	0.0418743	0.00167913	0.000263678	0.00599685	0.00523481	0.0010726	0.00117849	0.0024948	0.00937507	0.0104535	0.0844672	0.338312	0.0659358	0.0337843	0.00719364	0.0129836	0.00451694	0.00829204	0.0328534	0.0065868	0.0168606	0.0275385	0.0051909	0.0936161	0.0553849	0.00681884	0.0172589	0.0352464	0.0255828
fraction	K01338	CTSB; cathepsin B [EC:3.4.22.1]	0.16529	0.353343	0.127465	0.0173721	0.0123101	0.0203666	0.053133	0.0484415	0.00334953	0.0357698	0.0214209	0.01753	0.0439941	0.0217954	0.0433713	0.00985364	0.0725855	0.154167	0.0496173	0.0614195	0.00875519	0.0361164	0.0408389	0.0284719	0.0583765	0.0339216	0.0137155	0.0766265	0.117595	0.0041236	0.0584387	0.0380009	0.122789	0.0491214	0.0482643	0.0122929	0.0478193	0.0685692	0.0561598	0.0639448	0.0142133	0.0219443	8.73412e-05	0.00159564
fraction	K01354	CTSD; cathepsin D [EC:3.4.23.5]	0.000998793	0.00394713	0.0116738	0.000870001	0.00125234	0.0011964	0.00150674	0.00145234	9.43665e-05	0.00106026	0.000529405	0.00492283	0.000274005	0.0136635	0.000832824	0.000417484	0.00338215	0.0102028	0.00103299	0.00081905		0.000683251	0.000560851	2.76399e-05	0.000317695	0.0003872	0.000492228	0.00123144	0.000767214	4.04973e-05	0.000295196	0.000375442	0.000499919	0.00103045	0.000415498	0.00462299	3.58702e-05	0.000145743	0.000928197	0.00174052	0.000996657	0.000582987
fraction	K01356	CTSE; cathepsin E [EC:3.4.23.34]	0.0327488	0.00661417	0.00259717		0.00160793	0.0138972	0.0468319	0.00497585	0.000992225	0.00235449		0.000399755			0.00173085			0.00327789	0.0584838	0.059957		0.0127406	0.0179488	0.00037492	0.000609102	0.000619458	0.00591532	0.000493055	0.00202782		7.04014e-05	0.00243597	0.000294537	0.00325165	0.000799754	0.00247043	0.000211507	0.000342155	0.00200795	0.00366732	0.00440024	2.66827e-05	7.76407e-06	0.000374265
fraction	K01363	prtC; serralysin [EC:3.4.24.40]			4.96259e-05							0.00204761				0.00133157		0.00127253																			0.12628	0.0110308			0.101896				0.00102196	5.31014e-05	0.000670922		0.000562294
fraction	K01379	IDE, ide; insulysin [EC:3.4.24.56]		5.49746e-05	0.000387728		0.0707492		8.85268e-05		5.60626e-05			0.00154607	0.000441707		0.000233455			0.000590552	0.000777394	0.0020153	9.10742e-05	0.00058739	0.000573752		0.00333207	0.00912294	0.00345941	0.0211501	0.00963223	0.0262546	0.0147297	0.00720869	0.00126474	0.00387386	0.00688813	0.00814165	0.0063681	0.00399696	0.0259755	0.0127557	0.00426243	0.0089873	0.0265317	0.024092	0.000166977	0.00442031	0.00554467
fraction	K01382	PMPCA, MAS2; mitochondrial-processing peptidase subunit alpha [EC:3.4.24.64]		1.59923e-05	0.000112791		0.0205812		2.57527e-05		1.63088e-05			0.000449757	0.000128494		6.79128e-05			0.000171793	0.000226147	0.000586258	2.64938e-05	0.000170874	0.000166906		0.00096931	0.00265389	0.00100635	0.00615262	0.00280205	0.00763754	0.00428492	0.00209703	0.000367916	0.00112692	0.00200378	0.00236843	0.0018525	0.00116273	0.00755636	0.00371069	0.00123996	0.00261443	0.00771815	0.00700844	4.85741e-05	0.00128588	0.00161296
fraction	K01406	prlC; oligopeptidase A [EC:3.4.24.70]	0.000143994	2.64928e-05	0.000911204		8.72772e-06	5.44781e-05	0.000903035	0.000232586	1.95987e-06	4.36265e-05	9.47316e-05	0.000220526	7.74276e-05	3.82928e-05	0.000358163	5.32331e-05		3.67636e-05	0.00121051	0.000180877	0.000567795	0.000321727	0.000642894	0.00195592	0.000777258	0.00200289	0.000600277	0.0011242	0.00019334	0.000275511	0.000946769	0.00263977	0.000513215	0.000497423	0.000250065	2.8076e-05	0.00307255	0.00116091	0.000618828	3.97967e-05	0.000254342	0.000359544	0.000912969	0.000692528	0.00155171	0.00191461	0.00157966
fraction	K01408	ECE; endothelin-converting enzyme [EC:3.4.24.71]	6.68166e-05		0.000117473		0.00313221	0.000106087	9.11269e-05	0.00041036	5.35498e-06	0.000283873	0.000640142	0.000120616	0.001647	0.000195924	7.11133e-05	0.000165769			0.000493584	7.30098e-05	0.000226661						5.36627e-05			2.70331e-06						0.00225151							0.0038166	0.00186496	0.00134088	0.000949054	0.00061222
fraction	K01412	hslV, clpQ; ATP-dependent HslUV protease, peptidase subunit HslV [EC:3.4.25.2]			2.03889e-05		5.24042e-05	0.000152698	5.18999e-06	0.000501273					0.000358565							3.92102e-07																							0.000169394	0.000477221	0.000136379	0.0038082	0.00463418
fraction	K01414	ureC; urease subunit alpha [EC:3.5.1.5]	0.0177163	0.0299285	0.00345097	0.0023101	0.00230539	0.00169659	0.0343535	0.00749823	0.00221595	0.00162128	0.00304116	0.00488219	0.00168034	0.00582574	0.0184514	0.000801212	0.00117575	0.00217125	0.0255466	0.032446	0.00459269	0.0115179	0.0124743	0.00300767	0.00143226	0.000455279	0.000597571	0.000361918	0.00199957	0.0062327	0.00110715	0.00175431	0.000534913	0.000590241	0.00184964	0.00102218	0.00284375	0.00170591	0.000544741	0.0036265	0.00183412	0.00110745	0.000557206	0.00772568	0.00103609	0.0010205	0.00111242
fraction	K01415	purU; formyltetrahydrofolate deformylase [EC:3.5.1.10]	0.0863675	0.075599	0.0169479	0.079652	0.051771	0.00880853	0.0358896	0.0459235	0.00631357	0.186753	0.027054	0.0413968	0.0209204	0.235788	0.0129452	0.013553	0.00712406	0.296207	0.0717498	0.0477843	0.00615712	0.0215882	0.00783507	0.00657785	0.0410526	0.00430467	0.0012381	0.030679	0.0203276	0.00130306	0.00180084	0.00451186	0.0103549	0.0125047	0.0173662	0.00191595	0.00430536	0.00243308	0.0232985	0.0215813	0.00456222	0.00401009	0.00535288	0.00408225	0.000638789	0.000829493	0.00134389
fraction	K01419	pac; penicillin G amidase [EC:3.5.1.11]	0.0646757	0.0362286	0.0694541				0.0108569	0.000862041	0.000183763	0.00442463	0.00380636	0.0189585	0.00140938	0.00603174	0.00828368			0.0102236	0.00365954	0.00897142	1.68119	1.49058	1.42024	0.000657979				0.00100093	0.00158443	0.000324209		0.00685835	0.00699733	0.000606614	0.0247159		0.00330176	0.0039734		0.00935357			0.00034075	0.00524148	0.00612596		0.000238915
fraction	K01428	yhaA; amidohydrolase [EC:3.5.1.-]	5.04496e-06	5.81671e-06	9.88487e-06	0.000409278	0.000637935		4.37421e-05	0.0055553	7.84522e-06	0.000253724		0.000235997	0.00102476	0.000237758	1.97516e-05	0.000114294	0.00181714	0.000493016	0.000134852	7.07184e-05	9.32954e-05	0.00459967	0.00525972	0.000144999	0.000810622	0.00011073	0.000112012	0.000119515	0.000829348		0.000777568	1.70117e-05		0.000305735	1.16456e-05	1.08728e-05	0.00224292	0.0017686	0.000305756	0.000502153	5.9537e-05	4.86176e-05	0.00135557	0.00343375	0.0417473	0.189568	0.0224065
fraction	K01433	xlyAB; N-acetylmuramoyl-L-alanine amidase [EC:3.5.1.28]	0.12099	0.0280965	0.004539	0.00171851	0.0166956	0.0383991	0.0325143	0.0173856	0.000243303	0.0125731	0.0557805	0.509885	0.503007	0.0883806	0.00306144	0.0070996	0.0741274	0.037802	0.0124088	0.0194433	0.0183424	0.0604666	0.154986	0.0168137	0.00328965	0.00184666	0.000888932	0.000385745	0.00326414	0.000841292	0.00965945	0.0079467	0.00214798	0.00393631	0.00780076	0.0166244	0.0123697	0.0185901	0.00517103	0.0118658	0.00804441	0.00804372	4.43572e-05	0.00208713	0.000842294	0.00116119	0.000742476
fraction	K01434	E3.5.1.49; formamidase [EC:3.5.1.49]	0.00499289	0.0016651	0.00141044		0.000869738		0.000841736	0.0015594	9.9294e-06	0.00541352		0.0179094	0.00466877	0.0085813	0.00108865	0.000103919		0.00460768	0.000473404	0.00067335		0.000117328	3.9156e-05					0.000165324	0.000199178			0.000840417	1.16142e-05	0.000767145	4.81031e-05	8.98341e-05	9.70736e-05	2.8347e-05	0.000201054	0.000149774	5.17396e-05	1.62409e-05
fraction	K01436	PDF, def; peptide deformylase [EC:3.5.1.88]	0.0558198	0.0372272	0.0225958	0.00545338	0.0264048	0.051916	0.0209752	0.0149151	0.00968669	0.0141187	0.0293273	0.0211797	0.039041	0.0185087	0.00968219	0.00591987	0.00395516	0.0136713	0.0373853	0.0310055	0.00045548	0.00537907	0.00490676	0.00942736	0.00932229	0.00702342	0.00259531	0.015799	0.0149893	0.000225426	0.000741957	0.0180693	0.0253791	0.0367173	0.0106431	0.00453162	0.00715561	0.00287199	0.0210613	0.0328982	0.00267267	0.00159362	0.00113797	0.00399172	0.00182271	0.00375176	0.000209321
fraction	K01447	DPYS, dht, hydA; dihydropyrimidinase [EC:3.5.2.2]		0.00219657	0.00209955		0.0015812		0.000254181	0.000140433	2.11677e-05	0.00142817		0.000840514	0.000668527	2.81855e-05	0.000190654				0.000410463	0.000643783	0.00104697	0.000307318	0.000767079	0.000121818			2.32348e-05	0.00152599	0.00010037	9.67408e-06		3.35384e-05	0.00099824			0.000393206	0.00104965	0.000870864	0.00151862	8.16745e-05	1.49519e-05	0.000882463	3.80199e-05	1.53338e-05	0.000323743
fraction	K01455	OPLAH, OXP1, oplAH; 5-oxoprolinase (ATP-hydrolysing) [EC:3.5.2.9]	0.0151428	0.00133579	0.00211672	0.00397831	0.00226082	0.000288855	0.00147279	0.0104857	7.60269e-05	0.0212391	0.0227561	0.0283764	0.00718025	0.0309242	0.00240944	0.000510339	6.48034e-05	0.0439279	0.000569073	0.000690873	0.153176	0.0715715	0.111418	0.175733	0.150029	0.192103	0.144852	0.0175591	0.0140464	0.0301479	0.0145341	0.0481765	0.0330378	0.0110104	0.0278155	0.0495845	0.0615183	0.0329408	0.0160063	0.0210816	0.254099	0.278884	0.000393278	0.000336928	0.00855199	0.00151159	0.0002491
fraction	K01462	hyuA; N-methylhydantoinase A [EC:3.5.2.14]	0.00992896	0.00672462	0.00211638		0.00107286		0.00045485	0.0110496	0.000198723	0.0131342	0.0161183	0.00450753	0.000104144	0.00523492	0.000757226	0.001343	0.0008929	0.000552903	0.00221889	0.00345505					0.00216576		0.000706716	0.0206701	0.0397354		0.00319772		0.00728556	0.0130035	0.0235122		0.00146393		0.00451461	0.0191381	0.00544803	0.014056	0.00202167	1.45652e-06
fraction	K01464	hyuB; N-methylhydantoinase B [EC:3.5.2.14]	0.000395724	0.0025928	0.00556191		0.00285003		0.00174511	0.023766	3.60506e-05	0.00154013	0.000427084	0.00314718		0.00330783	0.00223543	1.97375e-05		0.00199397	0.0056446	0.00427	0.00313664	0.0183294	0.0473856	0.0263304	0.0135569	0.0177517	0.0290768	0.00403569	0.00273736	0.00403247	0.0114968	0.00547571	0.028344	0.00663654	0.000661405	0.00262293	0.039282	0.0209031	0.00701471	0.00548365	0.0115414	0.0155064
fraction	K01469	E3.5.3.1, rocF, arg; arginase [EC:3.5.3.1]	2.5751e-06		1.66572e-05	0.00010714	0.000136021	5.84912e-05	0.000313621	0.00135088	2.96984e-05		1.46634e-05	4.05412e-05	9.80046e-06	5.76378e-05	0.000484341	0.000318637		0.000427531	6.01801e-05	0.000283884	0.00110345	0.0233671	0.0185369	0.0006606	0.000862789	0.00255861	0.00135796	0.000267269	0.000637952	0.00087416	0.00240372	0.000793541	0.00547337	0.000830452	0.0013639	0.000988561	0.00220091	0.00107082	0.000397223	0.000549432	0.00325702	0.00205401	0.000138885	0.00140914	0.00127559	6.3699e-05	0.000163402
fraction	K01473	add, ADA; adenosine deaminase [EC:3.5.4.4]	6.23454e-05	1.71403e-05	0.000796095	0.000604649	0.00158338		0.000325043	0.0274819		0.00166562	0.022673	0.0111747	0.000459404	0.000578387	3.15948e-05	8.83578e-05			6.28459e-06	4.65478e-06	0.041855	0.0680004	0.0807919	0.0103911	0.0110436	0.0092388	0.00326881	0.00911987	0.0190657	0.0173262	0.00907164	0.0718132	0.0381855	0.00257589	0.00400427	0.0176132	0.0221348	0.0144383	0.0109142	0.00830711	0.00484105	0.0102087	0.00259213	0.0024957	0.00741339	6.3699e-05	0.000163402
fraction	K01474	dcd; dCTP deaminase [EC:3.5.4.13]	0.00096703			0.00240777		0.00716213	0.000173112	0.000930734	6.96769e-05	0.000122991		0.00172896		0.000165205		8.10941e-05	0.00071666	0.000355141	0.000218129	4.21161e-05	0.00118793	0.0539079	0.0603692	0.00589202	0.0180781	0.00921293	0.00485147	0.00201356	0.00907009	0.000883216	0.00617423	0.0420514	0.0102445	0.0151202	0.00300625	0.00883517	0.016075	0.0124428	0.00609891	0.00910397	0.00433878	0.0145763	2.4219e-05	0.00540032	0.00100416	0.000254886	0.000124291
fraction	K01476	GCH1, folE; GTP cyclohydrolase IA [EC:3.5.4.16]		0.00065399					0.000912512	0.000260731	0.000507635	0.000245031		3.47187e-05			0.00172845			0.000381297	0.000385789	0.000750077	0.0414897	0.00662945	0.00281149	0.00379277	0.00387307	0.00663231	0.0194198	0.00436676	0.00377694	0.0876665	0.010984	0.000342765	0.0017717	0.0067447	0.00217385	0.0185386	0.00238753	0.00580936	0.00581313	0.00486638	0.00486518	0.00755714	0.0294397	0.0248396	0.0106914	0.0014867	0.00472266
fraction	K01488	ppa; inorganic pyrophosphatase [EC:3.6.1.1]	7.01938e-06	0.000463484	7.58741e-05		0.000597699	0.000136423	0.00110306	0.000704811	1.90774e-05	5.40318e-05	0.00119055	0.000312416		0.000530103	0.000248996	0.000108638		0.00243508	0.00022996	0.000362462																								0.0046022	0.0025513		0.000639885
fraction	K01494	hisE; phosphoribosyl-ATP pyrophosphohydrolase [EC:3.6.1.31]	0.0971552	0.101207	0.0778149	0.00019288	0.0441666	0.00381443	0.0200782	0.359977	0.000700311	0.0359308	0.142267	0.102249	0.0726779	0.0999387	0.00671364	0.0050742	0.00366926	0.26221	0.00721066	0.0179953	0.420147	0.376467	0.586532	0.22282	0.23632	0.0541001	0.172306	0.0612195	0.171066	0.145816	0.140413	0.0553244	0.131098	0.11236	0.110574	0.323294	0.388139	0.29693	0.0956598	0.121722	0.020612	0.00837014	0.000610284	0.000594917	0.00747672		0.0328233
fraction	K01495	FAH, fahA; fumarylacetoacetase [EC:3.7.1.2]		0.00251727	0.00298956				0.00618287		0.000372845						0.0202991				0.00258821		0.0024187	0.00090362	0.00123581				4.04048e-05	0.000206691	0.000469531				0.0010689	0.00022932			0.000121156	0.000118042	0.000384022	0.00028941	0.000202536	0.000384185	0.00821814	0.00877768	0.00035074	0.000196727	0.0149679
fraction	K01507	oadA; oxaloacetate decarboxylase (Na+ extruding) subunit alpha [EC:7.2.4.2]	0.198627	0.0464542	0.259998	0.0041315	0.0479168	0.0471327	0.168039	0.115652	0.0266954	0.153942	0.0378307	0.0671283	0.0476957	1.52687	0.0685873	0.0076517	0.143328	0.761264	0.230071	0.166719		0.000663037	0.00068731	0.00637699	0.00747353	0.01691	0.00404819	0.0155592	0.0290473	0.0012738	0.00497594	0.00616721	0.0115969	0.0227184	0.0269797	0.00353297	0.00728987	0.00340818	0.0192182	0.0279992	0.00283681	0.00661876	0.025591	0.0772776	0.168778	0.00505664	0.132339
fraction	K01523	E4.1.1.18, ldcC, cadA; lysine decarboxylase [EC:4.1.1.18]	6.76145e-05	1.69457e-05	4.59327e-05		0.000399023	0.00866307	0.000437919	0.000190978	0.000310597	0.000131051	0.00128374	0.00266049	0.00209965	0.000277248	0.000646957		0.00182346	0.00741822	0.00046051	0.000102033		3.22673e-05			0.00377638		0.0258167		0.000272966	0.0132099	0.00451048	0.000912974	0.000236091			0.00119203			0.000844202		0.0044463	0.02872	0.00307739	0.00171983		0.00912283
fraction	K01555	speA; arginine decarboxylase [EC:4.1.1.19]		0.000447669	0.00117593	0.00779511	3.95883e-05		0.000738921	0.000925584	8.13402e-05	4.84541e-05	0.000502899	0.000450288	0.000331742	0.00173907	0.00424966	0.000100494	0.000186439	0.0021401	3.4173e-05	4.76749e-05	0.0136482	0.00747877	0.000746021	0.0012922	0.00535309	0.00272675	0.000432932	0.00200946	0.0029073	2.33529e-05	0.000519622	0.00312671	0.00765325	0.00118809	0.000268371	0.000398547	0.00256365	0.000343603	0.00278463	0.00339688	0.000581995	0.000934196		0.000172332
fraction	K01571	lysA; diaminopimelate decarboxylase [EC:4.1.1.20]	0.0389306	0.0838646	0.0575053	0.00953986	0.0960763	0.0540997	0.101603	0.329736	0.0248293	0.0509898	0.617518	0.412043	0.586987	0.0295219	0.0443681	0.0442212	0.137279	0.454934	0.112644	0.054791	0.0170268	0.0765765	0.125084	0.0246994	0.00756998	0.0178741	0.00620185	0.0374407	0.0903604	0.00281174	0.0118664	0.0374061	0.0706258	0.0723736	0.0225968	0.00982592	0.0223558	0.0124182	0.0136409	0.0398989	0.0415216	0.0407936	0.00079972	0.0311555	0.00739402	0.0024434	6.21879e-05
fraction	K01572	purE; 5-(carboxyamino)imidazole ribonucleotide mutase [EC:5.4.99.18]	0.0318282	0.0177953	0.00339443	0.00255831	0.00690379	0.00281965	0.00220931	0.0379368	0.000180432	0.0213865	0.00928316	0.00377391	0.0250269	0.0203839	0.0160357	0.0107247	0.00523632	0.0042306	0.00662734	0.000984516	0.000265043	6.98964e-05	0.000630482	0.000378807		6.5212e-05	1.54157e-05	0.00325556	0.00547617	0.000204482	0.000200842	6.41285e-05	8.74134e-05	0.00301076	0.00099463	5.58886e-05	0.00262593	0.0015712	0.00196831	0.00275995	0.00143806	0.00218997
fraction	K01582	purK; 5-(carboxyamino)imidazole ribonucleotide synthase [EC:6.3.4.18]							5.95214e-05		1.27914e-06						2.30332e-05			0.00129969	6.93533e-06	2.7638e-06	0.00622183		0.000928272				2.43784e-05	0.000488703	0.000515904	0.322753		0.00076108	0.00327737	0.000878119		0.00651729	0.000815264	0.000260266	0.000327101	0.000199483	0.0034813	0.000248542
fraction	K01585	E4.1.1.32, pckA, PCK; phosphoenolpyruvate carboxykinase (GTP) [EC:4.1.1.32]	0.0136066	0.0288474	0.00940079		0.00395038	0.00467086	0.0014011	0.00188921	0.000349737	0.00688909	0.016521	0.00431179	0.0266791	0.000542966	0.00138319	0.00142839	0.0225633	0.00922625	0.00312366	0.00233495	3.75951e-05	0.000199688	0.000219459		0.000856405	0.00070612	1.79323e-05	0.00294202	0.00539917	6.0512e-05	0.000261204	0.000112035	0.000518964	0.00158102	0.00501837	0.000323334	0.000985025	0.0008369	0.00382374	0.00765501	0.000107298	0.00440825
fraction	K01586	MVD, mvaD; diphosphomevalonate decarboxylase [EC:4.1.1.33]	0.00342163	0.0145334	0.0247502	0.00354716	0.00402961	0.00740344	0.0106478	0.0282088	0.00393481	0.0033958	0.000716141	0.00766441	0.0027568	0.00925999	0.00553497	0.00096734	0.00171222	0.0129433	0.0102205	0.0122363	0.00987047	0.0165513	0.020066	0.0126056	0.00898794	0.00756013	0.003495	0.00716621	0.0119373	0.000169973	0.0106784	0.279015	0.861672	0.00786594	0.00774766	0.00836111	0.00770984	0.00805148	0.00357252	0.0139349	0.0496282	0.00445076	5.01796e-05	0.00537912	0.000256672		8.74282e-05
fraction	K01588	E4.1.1.49, pckA; phosphoenolpyruvate carboxykinase (ATP) [EC:4.1.1.49]	0.00518799	0.0129337	0.0014078		0.00755703	0.000330406	0.0138724	0.00361571	0.00106961	0.00661851	0.00133279	0.000818772	0.00313004	0.00727868	0.00629816	0.00209974	0.00179546	0.00553702	0.0179992	0.0194275		0.00123464	3.54024e-05																					0.000259534
fraction	K01589	psd, PISD; phosphatidylserine decarboxylase [EC:4.1.1.65]	0.00961055	0.0154296	0.0126702	0.00012346	3.5663e-05	0.00102531	0.0030798	0.00116994	0.000418579	0.00101328	0.00176787	0.000514038	0.00166533	0.000514787	7.21136e-05		2.85858e-05	0.00106578	0.00894185	0.0259774	0.000242822	0.000303474	0.00112011	0.000164667	0.000139226	0.000200025		2.27498e-05	0.000261043		0.000610079	0.00268636		0.00637505	0.00049257			6.02559e-05	0.000428602	0.000380597
fraction	K01596	ALDO; fructose-bisphosphate aldolase, class I [EC:4.1.2.13]	0.00349116	9.68141e-05	0.00186317	0.00151249	0.00471772	0.00342894	0.00139616	0.047845	6.24467e-06	0.000699953	0.0189507	0.000782685	0.00524498	0.00110723	0.000594508	0.000699128	0.00017626	0.0533305	0.000892714	0.000249082	0.00138237	0.000461716	0.000112079	0.000802422	0.00127743	0.00027167	0.00070697	0.000144075	0.0017111		0.000778734	4.2604e-05	0.00020503	0.00176917	0.000628821	0.000270959	0.000141236		0.000234049	0.000475764	0.000185059	1.84648e-05
fraction	K01597	FBA, fbaA; fructose-bisphosphate aldolase, class II [EC:4.1.2.13]																					7.7018e-05	0.000114593	0.000132274	0.000211511	6.21858e-05	9.9673e-05	6.66743e-06		7.713e-05	4.3953e-07	0.000310339				9.96275e-05		0.000608818	0.000494339	3.90718e-05	0.000266172		0.000254188		6.07148e-05
fraction	K01610	E2.5.1.54, aroF, aroG, aroH; 3-deoxy-7-phosphoheptulonate synthase [EC:2.5.1.54]	0.0411286	0.0609183	0.0722903	0.0345781	0.0196162	0.054596	0.0501395	0.0243792	0.132787	0.0108556	0.0317589	0.0848838	0.0429112	0.0678687	0.016682	0.0122529	0.0925853	0.038724	0.044651	0.0733007	0.0357811	0.087483	0.105937	0.035176	0.0384716	0.0363983	0.0147466	0.0440258	0.084288	0.00853637	0.0150545	0.136091	0.0371918	0.0426392	0.0254613	0.0162001	0.0311147	0.0224127	0.0414159	0.0809513	0.013746	0.0258583	0.00130782	0.0248303	0.0259124	0.000888125	0.00876119
fraction	K01613	E4.1.3.1, aceA; isocitrate lyase [EC:4.1.3.1]	0.0581514	0.0293027	0.0153805	0.012563	0.00328239	0.00232838	0.0143561	0.0174559	0.00387804	0.0623606	0.0121746	0.00545269	0.00389456	0.0351475	0.00817586	0.00121055	0.000621097	0.0243344	0.0364546	0.0320355	0.00441941	0.00774403	0.00471733	8.55381e-05	0.000164165	5.10085e-05	4.17342e-05	0.00232965	0.00479203	0.000238209					0.00142051	0.00032436	0.000247632		0.00295921	0.00115363	0.00391696	0.000727806	9.98823e-05	0.00314137	7.66398e-05		0.00958357
fraction	K01623	CS, gltA; citrate synthase [EC:2.3.3.1]	0.0269076	0.11497	0.0540056	0.0144265	0.129834	0.0292746	0.226548	0.0547973	0.296026	0.0801402	0.211303	0.191264	0.32048	0.100669	0.148664	0.0102215	0.0222781	0.121263	0.347101	0.589714	0.0204352	0.0394971	0.0291179	0.0245802	0.0120428	0.0217959	0.00580612	0.247934	0.0369144	0.012885	0.0186796	0.630912	0.221287	0.00507702	0.0575001	0.0576064	0.0605386	0.0167832	0.111742	0.0406398	0.0156213	0.00381181	0.94073	0.537534	0.268838	0.56207	1.70005
fraction	K01624	ACLY; ATP citrate (pro-S)-lyase [EC:2.3.3.8]	0.00193723	0.00207517	0.00556797	0.044082	0.000628523	0.0188593	0.0169602	0.00155745	0.0216851	0.0278909	0.00709157	0.00343441	0.00452989	0.00254666	0.0214998	4.31111e-05	0.000166282	0.0037999	0.00998389	0.0314924	0.0637292	0.150146	0.113816	0.00970016	0.0161205	0.124029	0.0032018	0.0102099	0.0232904	0.00181316	0.00853941	0.0213555	0.0521651	0.0254688	0.00573853	0.149825	0.0156749	0.00909853	0.0110668	0.0117729	0.0238801	0.0411541	0.00504509	0.0308209	0.00493456	0.00729504	0.00199943
fraction	K01626	leuA, IMS; 2-isopropylmalate synthase [EC:2.3.3.13]	0.0214507	0.0327859	0.0225936	0.00222411	0.00647593	0.000262814	0.0495079	0.0611336	0.0627502	0.0229201	0.0102899	0.0486552	0.0836025	0.0265847	0.0497602	0.00184697	0.00693378	0.0312849	0.0864891	0.0856063	0.00332294	0.0639321	0.0122319	0.0445732	0.924787	0.201498	0.0628897	0.0165243	0.0406084	0.0520915	0.0364662	0.0378572	0.078133	0.298446	0.0285517	0.0233462	0.0881341	0.156363	0.0256638	0.0283351	0.0335441	0.0694581	0.00156298	0.00293777	0.0113598	0.000386527	0.0001763
fraction	K01637	E2.2.1.6L, ilvB, ilvG, ilvI; acetolactate synthase I/II/III large subunit [EC:2.2.1.6]	0.206113	0.177942	0.207944	0.264408	0.144239	0.312812	0.662538	1.0675	0.131392	0.66335	0.395403	0.356346	0.20501	2.33955	0.209389	0.0727786	0.337686	2.62079	0.571587	0.61078	0.145537	0.623623	0.735032	0.368983	0.166545	0.280504	0.0954295	0.190431	0.398996	0.0298637	0.158642	2.46566	1.27956	0.164572	0.177069	0.0450572	0.271512	0.247075	0.125471	0.250466	0.157281	0.0728721	0.258896	0.167179	0.104351	0.0827533	0.013122
fraction	K01647	E2.2.1.6S, ilvH, ilvN; acetolactate synthase I/III small subunit [EC:2.2.1.6]	0.251262	0.499052	0.2692	0.0713373	0.123543	0.235247	0.425898	0.988018	0.283768	0.0839905	0.345104	0.487019	0.285554	0.0846958	0.161612	0.0466002	0.16942	0.232897	0.329057	0.315264	0.169106	0.812712	0.61497	0.174851	0.410079	0.184248	0.147443	0.135294	0.457014	0.0588649	0.115094	1.03809	0.762036	1.0678	0.0851522	0.134002	0.117847	0.0656836	0.150722	0.214465	0.229832	0.513961	0.0756116	0.446464	0.107349	0.216475	0.119632
fraction	K01648	neuB, nnaB; N-acetylneuraminate synthase [EC:2.5.1.56]																											0.00368101					0.00105513			0.0350569	0.00192289		0.0142184	0.00940575	0.00343535		0.0012955	0.0142802	0.0135009	0.0108411	0.0887716	0.158183
fraction	K01649	trpE; anthranilate synthase component I [EC:4.1.3.27]	0.0204099	0.0539234	0.0302913	0.00231958	0.0264177	0.00701048	0.046514	0.0286099	0.00386518	0.024585	0.0266092	0.0158797	0.0347307	0.0190336	0.0254463	0.00564122	0.00842206	0.016857	0.0404416	0.0455801	0.030233	0.0959221	0.0987814	0.0217405	0.0580345	0.00142916	0.00343298	0.0227116	0.0198056	0.00106973	0.00984122	0.0128284	0.029454	0.0204646	0.0491422	0.000947876	0.0291692	0.049233	0.0230018	0.0211626	0.00210911	0.0126489	0.000600404	0.00900556	0.0108592	0.0409188	0.00285527
fraction	K01652	cynT, can; carbonic anhydrase [EC:4.2.1.1]	0.00633133	0.0361606	0.00833881	0.00869294	0.00670715	0.00841776	0.0383321	0.0256146	0.0333029	0.0111565	0.00248508	0.0425568	0.0299285	0.00209992	0.0659059	0.00713743	0.00480967	0.00619153	0.0212649	0.0381877	0.00515032	0.0467918	0.0810268	0.0408844	0.0452972	0.0528339	0.0156835	0.021133	0.0283248	0.00693531	0.0300408	0.0326847	0.0170921	0.0610755	0.0129564	0.0135452	0.057518	0.0345828	0.0146626	0.0268394	0.0154494	0.0130038	0.0126559	0.0329872	0.0176827	0.00120985	0.00155913
fraction	K01653	E4.2.1.2A, fumA, fumB; fumarate hydratase, class I [EC:4.2.1.2]	0.0452922	0.0669669	0.0179347	0.0154819	0.0100397	0.0103147	0.436352	0.0224113	0.0207962	0.0262316	0.0571228	0.0334186	0.0158417	0.0202408	0.280127	0.0019223	0.0282786	0.0494083	0.128528	0.231341	0.0590689	0.052464	0.0683089	0.00254343	0.00225335	0.00356914	0.000160327	0.00659915	0.0154901	0.00113259	0.0116593	0.00387807	0.00258339	0.00563913	0.00558015	0.00703237	0.00414079	0.00415055	0.00819185	0.0121451	0.00854729	0.00251174	0.000963925	0.0435539	0.0347153	0.00413049
fraction	K01654	acnB; aconitate hydratase 2 / 2-methylisocitrate dehydratase [EC:4.2.1.3 4.2.1.99]	0.00231954	0.00309251	0.000777789		0.000159285		0.000127033	0.0129925	2.53038e-05	0.000325673	0.00275981	0.00171931		0.000233145		0.000209387	1.73348e-05	0.000554439	0.000847997	0.00210152	0.425786	0.00499008	0.00906159		0.00191384			0.00175752	0.00123928	0.000468058	0.0165957	0.00689331	0.00410333	0.00341691	0.0183269		0.00109618		0.00561115	0.00667609	0.00386375
fraction	K01657	araD; D-arabinonate dehydratase [EC:4.2.1.5]	0.00509036	0.0235885	0.00480882	0.00343294	0.000769759	0.011151	0.00414985	0.00177271	0.000644421	0.000191412	0.0129411	0.0123692	0.00311021	0.0134995	0.000523553	0.00109338	0.000144096	0.000876724	0.00915596	0.0146007		0.0561681	0.0852908	0.000654497			0.0048339	0.000155762	0.00105747	0.0010976	0.00656977		0.00295126	0.00405404	0.00521053	0.00052659	0.00800994	0.00848992	0.000287049	0.00488892	0.0147787	0.0058586	4.25877e-05	3.34675e-05	0.000357745
fraction	K01673	dgoD; galactonate dehydratase [EC:4.2.1.6]	0.00683647	0.0529155	0.0136679	0.00838708	0.0469905	0.0131284	0.00999006	0.0050465	0.00227681	0.00496369	0.039488	0.00973489	0.00945319	0.00933904	0.00594825	0.00708113	0.0347172	0.00938741	0.0110785	0.0129862	0.000963045	0.0200167	0.00647936	0.000419147	0.000878719		0.000139992	0.0101888	0.0105199	0.000291354	0.00111693	0.00361313	0.00438387	0.00298456	0.00976446	0.000210305	0.000556124	0.000599079	0.00702683	0.0123316	0.000454923	0.00271369	3.32643e-05	0.00291675		0.000123753
fraction	K01676	ilvD; dihydroxy-acid dehydratase [EC:4.2.1.9]	0.00377574	0.0142794	0.00700597	0.000239401	0.00875701	0.00280634	0.0378069	0.0166972	0.00165578	0.0107003	0.0463503	0.0113037	0.0162901	0.0134196	0.0093448	0.00560726	0.00357935	0.00777989	0.0227944	0.0438652	0.0137488	0.0785784	0.0613882	0.0133938	0.0169719	0.00148048	0.00981596	0.0242734	0.0252322	0.00486179	0.00840241	0.0899861	0.0879468	0.0482541	0.0191795	0.00487326	0.0116775	0.00656581	0.0278142	0.0322486	0.0138052	0.00898156	3.08966e-05	0.0167045	0.00401492
fraction	K01682	edd; phosphogluconate dehydratase [EC:4.2.1.12]	0.0435789	0.078089	0.0693553	0.0461687	0.140091	0.10067	0.399574	0.687669	0.287782	0.153575	0.345495	0.250722	0.0796805	0.0712671	0.4479	0.0336559	0.102924	0.210222	0.239723	0.20578	0.0459778	0.138434	0.119019	0.122947	0.0899747	0.252951	0.0353809	0.112204	0.214987	0.0142507	0.239274	0.569407	0.794496	0.430015	0.109155	0.031642	0.0927661	0.0454617	0.135915	0.200301	0.0956654	0.0343109	0.124671	0.127409	0.1159	0.0796151	0.042869
fraction	K01683	paaF, echA; enoyl-CoA hydratase [EC:4.2.1.17]	0.00468189	0.00713661	0.00270929	0.000153762		0.000289472	0.000612257		5.41829e-05	9.09774e-05	2.55928e-05	0.000187341		0.000440639		1.01193e-05		0.00123101	0.000782517	0.0025024	0.000392633			0.000189709		7.37567e-05			0.000717422										0.000575782	0.00148719			1.39106e-06	0.000230564	4.15853e-05	2.37135e-05
fraction	K01684	trpA; tryptophan synthase alpha chain [EC:4.2.1.20]	0.0279557	0.0642691	0.0175684	0.0016626	0.0113905	0.018076	0.00546677	0.00268124	0.000389617	0.0232686	0.000125905	0.00792224	0.00876151	0.00273124		0.00313048	0.00424213	0.00905821	0.00876037	0.0258862	0.00132769			0.000641505		0.000249409			0.00242597										0.00194702	0.00502896			2.28379e-06	0.000809058	4.15853e-05	2.37135e-05
fraction	K01687	trpB; tryptophan synthase beta chain [EC:4.2.1.20]	0.0047139	0.00606925	0.00335127	0.00174958	0.0102404	0.0163806	0.00768835	0.0868939	0.00313689	0.0868771	0.0306874	0.0290488	0.0192041	0.0253316	0.00879638	0.0140951	0.00625069	0.0574155	0.0128836	0.00825011	0.0780245	0.0874437	0.112304	0.0884787	0.0624144	0.0665555	0.232933	0.0488339	0.0627326	0.0449969	0.0269971	0.3106	0.0937213	0.0398269	0.117984	0.0503575	0.13147	0.0961796	0.0646718	0.0571118	0.0780468	0.0386074	0.00029115	0.00658226	0.000167135	0.000489167	9.33411e-05
fraction	K01690	leuC, IPMI-L; 3-isopropylmalate/(R)-2-methylmalate dehydratase large subunit [EC:4.2.1.33 4.2.1.35]	0.0538622	0.0796402	0.0139743	0.00358306	0.0621432	0.00395353	0.165009	0.0193999	0.0232666	0.0782997	0.0311567	0.0880491	0.0400041	0.19025	0.0568576	0.0183355	0.00739796	0.0625901	0.261708	0.381524	0.0127153	0.0318512	0.0228359	0.0180614	0.0207286	0.015005	0.0150044	0.0806149	0.0802065	0.0168219	0.0492113	0.0892698	0.0119597	0.0267267	0.0484623	0.0138734	0.0136491	0.00293811	0.0672044	0.0885092	0.00750933	0.0132966	0.00299647	0.00740022	0.00273673	0.00157987	0.00459449
fraction	K01692	rfbB, rmlB, rffG; dTDP-glucose 4,6-dehydratase [EC:4.2.1.46]	0.0782628	0.107097	0.00691541	0.000681869	0.0230975	0.00808094	0.0219768	0.014031	0.063949	0.012931	0.0340213	0.0102365	0.0104983	0.0283992	0.0178147	0.00123527	0.00131028	0.0139614	0.0252377	0.0485831	0.0427987	0.0559865	0.0483654	0.00359871	0.00466131	0.0111872	3.87606e-05	0.00507429	0.0246757	0.00244936	0.00561621	0.00107564	0.0733675		0.0390623	0.000377054	0.00591969	0.00196071	0.00542196	0.0350106	0.00449288	0.00156336	6.64526e-05	0.0103344	0.00459933
fraction	K01695	gmd, GMDS; GDPmannose 4,6-dehydratase [EC:4.2.1.47]		0.016409	0.00191404	0.0031069			0.00233652	0.00500342	0.000481569	0.00116467	0.0176624	0.0141198		0.00382114	0.00260138			0.00523056	0.00296614	0.0049178		0.0018606	0.00122148	0.000137674			0.000951298	8.68413e-05	0.00122069	0.000334847	0.000539897		0.000309949	0.000734581	0.00192404		3.94711e-05		0.00044583	0.000979276			6.23577e-05	0.00311698	5.84769e-05
fraction	K01696	hutU, UROC1; urocanate hydratase [EC:4.2.1.49]	0.0203868	0.0365468	0.0127886	0.00363991	0.00532131	0.00112325	0.23464	0.0132033	0.000561989	0.00653159	0.0101896	0.0094223	0.00387423	0.00109063	0.00874953	1.05363e-05	0.00026582	0.00218215	0.0183696	0.0248239	0.52167	0.440452	0.705192	0.0186494	0.0347141	0.00413511	0.0253396	0.00192443	0.00533964	0.00133614	0.0119934	0.0150753	0.0262054	0.000689703	0.00146653	0.00738336	0.00977021	0.00312747	0.00282269	0.00578358	0.0526082	0.0274622	0.00485855	5.27539e-05	5.3409e-05	0.000127462
fraction	K01703	pheC; cyclohexadienyl dehydratase [EC:4.2.1.51 4.2.1.91]	0.00176425	0.00648685	0.00401875	0.0363257	0.00423868	0.0384771	0.0196237	0.00262606	0.00168123	0.00240182	0.0138614	0.00890857	0.00221994	0.00104936	0.00277138	4.78928e-05	3.67681e-05	0.00418143	0.0137572	0.0199643	0.0169576	0.281229	0.345375	0.0107092	0.0127134	0.0112832	0.00119579	0.00776002	0.0178475	0.0254787	0.0031992	0.0347916	0.0326196	0.0188985	0.010833	0.0558875	0.0141025	0.0275695	0.0115049	0.01392	0.0139524	0.0117459	4.64428e-05	0.00145044	0.000352508	0.274198	0.0207193
fraction	K01710	dapA; 4-hydroxy-tetrahydrodipicolinate synthase [EC:4.3.3.7]	0.352501	0.462881	0.127118	0.00317882	0.00920872	0.00482463	0.0569318	0.0517718	0.00182329	0.0316612	0.00227073	0.00640509	0.00317113	0.0197967	0.00245163	0.0117893	0.00150921	0.00808818	0.0848961	0.128294	0.00120608	0.00395781	0.00834017	0.0014527	0.00153266	0.00064095	0.00104857	0.00120101	0.00182926	0.00185657	0.00070564	0.00050346	0.000320255	0.00786599	0.00278921	0.000596518	0.00126621	0.00138522	0.00455812	0.00312861	8.33068e-05	0.000381457		0.00684148
fraction	K01711	cynS; cyanate lyase [EC:4.2.1.104]	0.00708729	0.0214465	0.106412	0.0594708	0.00591308	0.000639014	0.0168618	0.0621739	0.0164503	0.000687949	0.00274209	0.00305827	0.00190834	0.00456261	0.00701493	0.00256316		0.0251504	0.00472359	0.106867	0.00143117	0.0118482	0.0125191	0.0169199	0.0621716	0.0753006	7.00425e-05	0.0104386	0.0265659		0.240424	0.000383669	0.0453161	0.0482025	0.0537651	0.000432323	0.122428	0.102652	0.126611	0.0439528	0.00333631	0.0409334		4.16842e-05	1.42183e-05
fraction	K01712	thrC; threonine synthase [EC:4.2.3.1]	0.0220954	0.0333365	0.0156614		0.000286951		0.00376818	0.0343975	0.000433034	0.0119228	0.0264944	0.00264977	0.000177319	0.0090795	0.00441576		0.00785103	0.0146942	0.00129034	0.00985712	5.15743e-05	0.00046727	0.0003542	0.00114206	0.00171638	0.000145495	0.000555672	0.000423764	0.000186454	0.000169427	0.00142885		0.000235824	7.27731e-05	0.000447932	0.00838678	0.00125685	0.00113747	0.00218127	0.00151846	0.00184221	0.00251027	0.00274337	0.000214444	0.000323954	0.0019379
fraction	K01713	aroB; 3-dehydroquinate synthase [EC:4.2.3.4]	0.00168649	0.00571452	0.00690264			3.03357e-05	0.000144751	0.000192869	1.86914e-06	0.00992849		0.00117264	0.00353191	9.11235e-06	0.00010993	3.42033e-06	4.7228e-05	6.09769e-05	0.000113273	0.00390225	0.00333059	0.00430734	0.0046911	0.0164517	0.00586087	0.010885	0.0528025	0.0136857	0.00497991	0.000261281	0.00120071	0.039	0.0061179	0.00172495	0.00202447	0.00250982	0.0111956	0.0113991	0.00455367	0.00584287	0.0674067	0.0290645
fraction	K01714	aroC; chorismate synthase [EC:4.2.3.5]	0.00308153	0.00466831	0.0123043	0.014376	0.0106725	0.0317883	0.0279162	0.0445961	0.0259867	0.0133904	0.00972129	0.00572811	0.062797	0.0142404	0.0194221	0.00685705	0.00581955	0.155219	0.0141751	0.0305047	0.00336132	0.0117668	0.0116099	0.0170984	0.011503	0.00427376	0.00320104	0.00597281	0.00671414	7.53019e-05	0.00204964	0.00885575	0.0219738	0.00870575	0.00733425	0.00265882	0.0140422	0.00775788	0.00231627	0.00538711	0.00183231	0.00236624	0.000157187	0.000607514	0.00106309		0.000519393
fraction	K01725	cysK; cysteine synthase [EC:2.5.1.47]	0.0363064	0.0439828	0.0284063	0.0265605	0.0796982	0.0392589	0.0175847	0.0101218	0.239122	0.0777992	1.13492	0.690539	0.939063	0.352625	0.0218034	0.000664858	0.0385909	0.402492	0.0173395	0.020071		0.0082575		0.00133855					0.00436429			0.0220923	0.00366264					0.00181802	0.00336102				0.00601817	0.00810657	0.000255699	0.000985252
fraction	K01733	metB; cystathionine gamma-synthase [EC:2.5.1.48]	0.048657	0.0426974	0.0485388	0.00101936	0.00243569	0.000656271	0.066703	0.0318386	0.0101691	0.0134044	0.0264186	0.0155395	0.00898077	0.147346	0.016195	0.00133463	0.00574746	0.149048	0.0612319	0.0781796	0.00921625	0.0390245	0.0453777	0.00584902	0.00553353	0.0052531	0.00952892	0.00443861	0.0106371	0.00087401	0.00239158	0.0120398	0.0169699	0.00352416	0.00791686	0.0283013	0.00921632	0.00847887	0.00395635	0.00737875	0.00989034	0.0408453	8.71104e-05	0.00525574	6.04272e-05	0.00586564
fraction	K01735	metY; O-acetylhomoserine (thiol)-lyase [EC:2.5.1.49]	0.000749047	0.0176085	0.00607588	0.000641667			0.0166705	0.00858281	0.00153264	0.000159794	5.74799e-05	0.000296765	9.87646e-05	0.00010212	0.00950934	0.00033814		1.92244e-05	0.0337398	0.0568468	0.000351206	0.00370679	0.00156871	0.0015723	0.000855477	0.000741382	0.00125926	0.000190982	0.00517444	6.98225e-05	0.00191591	9.34752e-05		0.00013173	0.00570639	0.00279109	0.00508988	0.00244304	0.000225891	0.000242343	0.000565616	0.00322917	2.1198e-05	0.000230939	0.000206449		4.56061e-05
fraction	K01736	hutH, HAL; histidine ammonia-lyase [EC:4.3.1.3]	0.00343267	0.00145676	0.140994		0.00850346	0.01453	0.00433416	0.00272728	0.000127032	0.00257486	0.016117	0.0118691	0.00440484	0.00113609	0.00127136	0.000396104	3.3192e-05	0.00166651	0.0026981	0.00216433	0.00380449	0.00582661	0.012267	0.0211082	0.00514552	0.0147288	0.0134487	0.0333309	0.0422692	0.00208835	0.0259039	0.0202442	0.0174025	0.00100897	0.0167797	0.0194803	0.0303513	0.00786851	0.0389179	0.0327133	0.0189136	0.0139539
fraction	K01738	E4.3.1.19, ilvA, tdcB; threonine dehydratase [EC:4.3.1.19]	0.286694	0.459403	0.190713	0.0910899	0.0781477	0.0871509	0.46886	0.0573577	0.189407	0.0912228	0.191683	0.203277	0.0836246	0.543656	0.686433	0.0192612	0.0509386	0.16157	0.402029	1.14785	0.191902	0.151814	0.107623	0.0333087	0.00995751	0.058136	0.243199	0.0281624	0.0626872	0.181813	0.175122	0.0541774	0.054358	0.0342561	0.0564463	0.176986	0.0801571	0.00928698	0.0390852	0.0515193	0.237982	0.412463	0.00280788	0.0347315	0.0383835	0.010947	0.00334647
fraction	K01739	argH, ASL; argininosuccinate lyase [EC:4.3.2.1]	0.000116527	9.00468e-05	8.47923e-05	1.27238e-05	0.000340619		0.000524051	0.000334343	4.93943e-05	4.86041e-05		0.000398238	0.000191205	0.000120678	3.724e-05	7.67468e-05	1.34718e-05	0.000307394	0.000356572	0.00028694			7.1792e-05		0.00239076	0.000531431	0.0272831	0.000303585	0.000760701	0.000190198	0.000316	0.00112749	0.000919574	0.000383061		0.000552566	0.00303942	0.00163636	7.79718e-05	0.000172764	0.000691706	0.0435111
fraction	K01740	purB, ADSL; adenylosuccinate lyase [EC:4.3.2.2]	0.0230267	0.045109	0.0454925	0.000802419	0.0117309	0.000990611	0.118425	0.0579341	0.000883775	0.107742	0.00953074	0.0310453	0.0113424	0.00530338	0.00415011	0.00313849	0.00692039	0.0119694	0.0464896	0.0702404	0.0917345	0.0397034	0.0558303	0.035874	0.0948555	0.0967726	0.0205108	0.0141614	0.110883	0.00751123	0.0401946	0.0372443	0.0691094	0.0264367	0.0748314	0.0171454	0.14448	0.119224	0.034714	0.0208124	0.0325171	0.062037	0.000415994	0.00697108	0.0202931	0.00646349	0.00240743
fraction	K01745	GLO1, gloA; lactoylglutathione lyase [EC:4.4.1.5]	0.0506123	0.0306687	0.0263661	0.00350357	0.00445763	0.016668	0.00244777	0.00433695	0.000260083	0.00528942	0.00298869	0.0128053	0.000249579	0.00478624	0.00173658	0.000605014	0.00386076	0.00525211	0.00124341	0.00154925	0.00070014		6.21664e-05	0.000652597			0.00176657		0.00058221	3.45391e-05			0.00239866	0.002448	0.000837964	0.00359833	0.000359372		0.000952208	0.000473038			0.00180466	0.00431232	0.00410647	0.00201766	0.00258612
fraction	K01754	E4.4.1.11; methionine-gamma-lyase [EC:4.4.1.11]	0.0038645	0.0258292	0.00837058	0.0458856	0.00227074	0.00304588	0.00566756	0.00557044	0.000259361	0.0208066	0.00549092	0.00935728	0.0192262	0.00422799	0.000668525	0.00144318	0.00811121	0.00293264	0.00495259	0.00672633		0.00139816	0.00112312	0.000225815		3.77802e-05	0.00121003	7.22271e-05	0.000229677	3.37037e-05			0.000398152	0.000105365		0.000678806	0.000353125	0.000260907	0.000362088	0.000103112	0.000562553	0.00091934
fraction	K01755	csdA; cysteine sulfinate desulfinase [EC:4.4.1.-]	0.0167512	0.0281343	0.00769982	0.000131314	0.0290674	0.0062254	0.0139091	0.0435578	0.000455065	0.008003	0.0695461	0.067976	0.0826599	0.0048472	0.00256148	0.00546141	0.0695851	0.04688	0.0050908	0.0111514	0.0197356	0.0260087	0.0413376	0.0287955	0.146637	0.0649072	0.00205031	0.00381413	0.00659944	0.000170071	0.00242516	0.11543	0.193734	0.0901455	0.00142669	0.000376341	0.00439635	0.00629584	0.00681788	0.00843802	0.0020493	0.0070839	0.00192493	0.00565125	0.00118905	0.00656469	0.00131377
fraction	K01756	hemH, FECH; protoporphyrin/coproporphyrin ferrochelatase [EC:4.98.1.1 4.99.1.9]	0.0129971	0.0385805	0.0405084	0.0026476	0.051889	0.00672041	0.039124	0.196196	0.00165386	0.0273275	0.0307748	0.0387732	0.0293858	0.0358796	0.0429273	0.0107778	0.00645432	0.0138648	0.0512778	0.0545991	0.045745	0.0775011	0.0543311	0.0226995	0.0947135	0.0325015	0.322116	0.0846644	0.0246154	0.00172651	0.133582	0.0683095	0.321543	0.00834326	0.295768	0.450329	0.0238672	0.078227	0.0359923	0.0199708	0.431509	0.124803	0.00870451	0.0661874	0.00212136	0.00556187	0.00667721
fraction	K01759	fadJ; 3-hydroxyacyl-CoA dehydrogenase / enoyl-CoA hydratase / 3-hydroxybutyryl-CoA epimerase [EC:1.1.1.35 4.2.1.17 5.1.2.3]	0.0274608	0.0158378	0.00523325	0.000912512	0.0104141	0.0145313	0.00284142	0.0195998	0.000447802	0.0314374	0.0203593	0.00310502	0.00631212	0.0796613	0.0059354	0.00167032	0.000227234	0.0127117	0.00627563	0.00840483	0.00141024	0.00343241	0.00276045		0.000851115			0.001968				0.000481317									0.000851515		0.000114613	0.00304319	0.000234798		0.00481295
fraction	K01761	rpe, RPE; ribulose-phosphate 3-epimerase [EC:5.1.3.1]	0.000622726	0.00020374	0.0169747				0.00116221	0.00881457	6.96275e-05	0.00135216		0.00109437		0.000223607	0.0020231	7.85063e-05	0.000327127	0.0014085	0.000339512	0.000781289	0.00234737	0.0121625	0.0163433	0.000259427	0.0218484	0.00512318	0.0198542	0.0028685	0.000216782	0.0018134	0.00335705	0.0116228	0.00626369	0.00431582	0.00033635	0.00216916	9.9631e-05	0.000211442	0.000727877	0.0017273	0.0116901	0.0136941
fraction	K01766	galE, GALE; UDP-glucose 4-epimerase [EC:5.1.3.2]	0.000409882	0.00141426	0.000290191	1.92423e-05	0.000762033	0.00119062	7.05598e-05	0.000568552	1.33845e-05			0.00144177		0.000718543	1.69947e-05	8.3555e-05		6.76598e-05	0.00010097	0.00210203		0.00287972	0.00574419										0.000932817	0.022294				0.00193155						0.00041134
fraction	K01772	rfbC, rmlC; dTDP-4-dehydrorhamnose 3,5-epimerase [EC:5.1.3.13]	0.0230838	0.0400932	0.0178999	0.0121867	0.00570693	0.00714544	0.00727693	0.00347067	0.00270144	0.00657954	0.00778582	0.00627549	0.0203777	0.0236503	0.00253822	1.17078e-05	0.00218133	0.00844773	0.00354843	0.00694868	0.00023395	0.0028645	0.00254477		0.000647505					5.35118e-06			0.00161374	0.00119053	0.000347868		0.000248479	0.000226898			1.54628e-06		0.000198465	0.0160892	0.00547634	0.000838921	0.000715298
fraction	K01782	E5.1.99.4, AMACR, mcr; alpha-methylacyl-CoA racemase [EC:5.1.99.4]	0.0391525	0.128367	0.0463602	0.0208908	0.0413099	0.0156429	0.118922	0.111746	0.00905203	0.235844	0.0695789	0.0795571	0.0664002	0.0449201	0.0445696	0.0192111	0.0130287	0.0527217	0.0707226	0.128538	0.153017	0.336897	0.322248	0.0731225	0.0228706	0.100266	0.0157292	0.0758381	0.140988	0.0150482	0.0574905	0.168785	0.093825	0.0875873	0.0754005	0.0286667	0.055209	0.0600128	0.0607222	0.130115	0.028749	0.0289209	0.00569274	0.060199	0.0169945	0.00352412	0.00807545
fraction	K01783	TPI, tpiA; triosephosphate isomerase (TIM) [EC:5.3.1.1]	0.0858932	0.0262692	0.066832	0.00897117	0.00404691	0.0463896	0.0128083	0.0137318	0.000254459	0.0197425	0.0742491	0.0820146		0.0445449		0.00989413	0.0482737	0.0120033	0.0299255	0.0550873	0.0244408	0.00413888	0.00601977				0.0013892	0.000100892		7.5429e-05		0.00181568	0.00658391	0.00052871	0.00191873	0.000165384	0.000196821				0.000423581	0.0100999	0.000837659	0.00398711	0.00628843	0.00529137	0.00256075
fraction	K01784	rpiA; ribose 5-phosphate isomerase A [EC:5.3.1.6]	0.100629	0.0889061	0.0223921		0.00135471	0.000187668	0.0107188	0.0107371	0.000709548	0.0891144	0.100848	0.0144828	0.00724412	0.0111533	0.0042559	0.127735	0.00894106	0.00433434	0.0140576	0.0262597	0.00161805	0.00614473	0.00593747	0.00494984	0.0213267	0.00332414	0.000190839	0.00122109	0.000930322	8.35995e-05	0.00038496	0.000373118	0.00192743	0.0076441	0.00100307	0.000154307	0.00279228	0.00156974	0.00317423	0.00226996	0.000449839	0.00240379	0.00399797	0.0444471	0.209281	0.0505245	0.0978989
fraction	K01790	GPI, pgi; glucose-6-phosphate isomerase [EC:5.3.1.9]	0.0742877	0.0766171	0.0441767		0.0003868	0.000832854	0.0338642	0.00589354	0.00252227	0.0177413	0.0111391	0.00766051		0.00660818	0.000436335	6.72788e-05	4.1106e-05	0.0286034	0.0221461	0.0276598	0.000158062	0.000824373	6.83397e-05	0.00193947	0.00191666	0.0030907	0.00317936	0.00816987	0.00513818	0.00045605	0.00103089	0.0038397	0.0027124	0.000777932	0.00534779	0.000215027	0.00256055	0.000204013	0.0108772	0.011026	0.00160331	0.00446785
fraction	K01796	trpF; phosphoribosylanthranilate isomerase [EC:5.3.1.24]		0.000921995	0.0095566					0.000156833		5.34069e-05						4.80607e-05				0.000140818		0.00221167	0.00267808	0.00902941	0.00870589	0.00370432	0.000776998	0.00366899	0.00270869		0.000723119		0.000681822	0.000891968	0.00405252	0.00159658	0.0108325	0.0104039	0.0109078	0.00546756	0.00153096	0.000693588		0.00210976
fraction	K01803	fadB; 3-hydroxyacyl-CoA dehydrogenase / enoyl-CoA hydratase / 3-hydroxybutyryl-CoA epimerase / enoyl-CoA isomerase [EC:1.1.1.35 4.2.1.17 5.1.2.3 5.3.3.8]	0.152892	0.102079	0.0104153	0.00563618	2.06907	0.000926252	0.0847995	0.161612	0.00560813	0.0583431	0.0208952	0.156322	0.0413922	0.71137	0.0415325	0.00584878	0.137508	1.75189	0.101142	0.128704	0.00534485	0.0226911	0.013688	0.00213714	0.00315392	0.00366708	0.0201082	0.00551404	0.00932707	0.026777	0.00332221	6.77262e-05	0.0108609	0.00391641	0.0169227	0.0271448	0.00521825	0.00467402	0.00816394	0.00882235	0.0049259	0.0053245	0.655778	0.645802	0.285981	0.0123314	1.10964
fraction	K01807	PGAM, gpmA; 2,3-bisphosphoglycerate-dependent phosphoglycerate mutase [EC:5.4.2.11]	0.0106766	0.0111933	0.00111191	0.0204121	0.132189	0.0938658	0.0398251	0.0411559	0.000393385	0.00630559	0.0150451	0.0757439	0.194677	0.0666124	0.0041898	0.0014753	0.024461	0.139292	0.0160939	0.0181766			0.00013456	0.00499587	0.00758025	0.00362699		0.00051469	0.000742799	3.36215e-06	0.00024715	0.00456224			0.000226224		0.00290183	0.00189402	0.000213771	0.00252104	0.000184775		0.00413714	0.00107754
fraction	K01810	pgm; phosphoglucomutase [EC:5.4.2.2]	0.00379915	0.00958283	0.0036078	4.90348e-05	0.00362534	0.00516059	0.00411318	0.00379174	0.000303905	0.000601154	0.00211094	0.00555342	0.00926705	0.00138141	0.00227873	0.00174058	0.013614	0.00521411	0.00570401	0.0122999	0.0337391	0.0327813	0.0248955	0.00416269	5.62457e-05	0.0018041	0.00907604	0.00199176	0.00646546	0.00255482	0.00086315	0.0244466	0.0580208	0.0110941	0.323007	0.00440365	0.0189583	0.0389124	0.00295245	0.0151615	0.00762397	0.0313067	0.403617	0.438481	0.23552	0.0449078	0.131008
fraction	K01817	manB; phosphomannomutase [EC:5.4.2.8]	0.000547961	0.000769054	0.00378774	0.00169908	0.00198621	0.000190796	0.00710553	0.00651555	0.000393882	0.0108774	0.0628509	0.000261964		0.00315845	0.000141858	0.00135376	0.000653282	0.00978032	0.00047522	0.00297111	0.0143205	0.0146435	0.0231063	0.000508937	0.000971411	0.000101993	0.00111782		6.94915e-06	2.10776e-05	0.000327585		0.000552042		6.64552e-06	0.000200527	0.000150226	1.14882e-05	6.99201e-05	7.85549e-05	0.00199194	0.00103877	0.000139462
fraction	K01825	hemL; glutamate-1-semialdehyde 2,1-aminomutase [EC:5.4.3.8]	0.0236402	0.0678954	0.0232983	0.024747	0.0525431	0.0537225	0.083654	0.10106	0.00655607	0.0862238	0.0544806	0.0665428	0.055619	0.0416998	0.0361469	0.0192175	0.0116309	0.0509684	0.0452306	0.0806504	0.320426	0.571878	0.607916	0.101028	0.146978	0.11535	0.0312631	0.0690848	0.123186	0.0121322	0.0528015	0.143044	0.133958	0.108934	0.0757523	0.0286665	0.0694136	0.0679334	0.0600615	0.101133	0.0326167	0.0296523	0.00554617	0.052639	0.0100669	0.00159887	0.000472009
fraction	K01834	WARS, trpS; tryptophanyl-tRNA synthetase [EC:6.1.1.2]	0.0578845	0.288895	0.038161	0.0173331	0.0720791	0.0108229	0.125558	0.0985733	0.00860348	0.0373117	0.0685441	0.0429678	0.0620488	0.011763	0.020735	0.00404389	0.10846	0.0145353	0.153	0.387214	0.0949859	0.160367	0.0197387	0.0292561	0.00160391	0.0549668	0.0901171	0.0257376	0.161468	0.00534508	0.011215	0.00210009	0.258384	0.00169615	0.0151782	0.294901	0.00826368	0.00732819	0.0149807	0.0671567	0.0438636	0.124976	0.00297285	0.210198	0.0064616	0.00334792	0.00409422
fraction	K01835	LARS, leuS; leucyl-tRNA synthetase [EC:6.1.1.4]	0.00199821	0.00531764	0.0015438	0.00108136	0.00342808	0.000801406	0.000967058	0.00116546	6.2448e-05	0.00016438	0.000160315	7.25627e-05		0.000722611	0.00116762	1.72697e-05	0.000402356	0.00099261	0.0018979	0.00332446	0.00161829	0.00465206	0.00162854	0.00144565	0.000914438	0.00103847	0.000314753	0.00314944	0.00584453	0.000321691	0.00139001	0.00193515	0.00520074	0.00106632	0.00455071	0.000755988	0.0114496	0.00824827	0.00524734	0.00468616	0.00161912	0.000274819	0.00134358	0.0176099	0.00235344	0.00074902	0.0177315
fraction	K01840	IARS, ileS; isoleucyl-tRNA synthetase [EC:6.1.1.5]	0.00521796	0.00746519	0.0184924	0.000229626	0.00693147	0.0845058	0.00996491	0.00542738	0.00101554	0.00317895	0.0268626	0.0176384	0.0023237	0.0145115	0.0052748	0.000192408	0.000357676	0.00633832	0.00693581	0.0157016	0.00326216	0.00905193	0.00928234	0.000366529	0.00115062	0.000487103	0.0027553	0.00340898	0.0025681	0.00153847	0.00445575	0.001534	0.00710788	0.010969	0.00108849	0.000378414	0.000644354	0.00103359	0.00358222	0.007061	0.00221671	0.00264309		0.000315417
fraction	K01845	VARS, valS; valyl-tRNA synthetase [EC:6.1.1.9]	0.00372484	0.0238154	0.0260113	0.00170121	0.010633	0.0072923	0.0033705	0.0216645	9.19479e-05	0.00652736	0.00239345	0.00289171	0.00181391	0.00217607	0.00178123	2.91843e-06	0.00380977	0.0107117	0.00287373	0.00305078	0.0233819	0.0481146	0.052488	0.068668	0.059436	0.0299649	0.0406442	0.0141386	0.0401439	0.0656109	0.0124088	0.112289	0.0491763	0.0685307	0.0964038	0.0322912	0.0859121	0.0409171	0.0268533	0.0275547	0.0783142	0.0031645	0.688925	0.019755	0.0118256	0.00537817	0.00876516
fraction	K01867	MARS, metG; methionyl-tRNA synthetase [EC:6.1.1.10]	0.000318246	0.0096009	3.62633e-05		3.4444e-05		0.00350653	0.0232921	0.00048833	0.0594115	0.000289699	0.000974757		0.0033792	0.019096	1.55912e-05		0.00320637	0.00119139	0.00521555	0.0327777	0.0238247	0.0403973	0.000736275	2.82392e-05		3.50933e-05	0.000848756	0.001633		0.00326969	0.000741443	0.0102597	0.0029227	0.00299708	0.00116183	0.00276527	0.00163519	0.000328983	0.000241864	0.000958971	0.00498013	0.000103708	0.00137754	0.00371766		0.000560722
fraction	K01869	SARS, serS; seryl-tRNA synthetase [EC:6.1.1.11]	0.0124575	0.047532	0.010801	0.000762262	0.00639746	0.0119307	0.0135309	0.0121482	0.00134189	0.0076166	0.0118835	0.0125014	0.0109719	0.00546297	0.00499415	0.000189544	0.0314302	0.0111701	0.00644725	0.00522247	0.0100507	0.0149742	0.011218	0.00232129	0.00152114	0.029568	0.00217661	0.00521841	0.00696191	0.000127132	0.00461508	0.0232652	0.00884748	0.000690678	0.014482	0.0013547	0.00751588	0.00560412	0.00513406	0.0068456	0.00811498	0.000311733	0.00167811	0.000214503	0.000289727	0.00104568	1.22671e-05
fraction	K01870	glyQ; glycyl-tRNA synthetase alpha chain [EC:6.1.1.14]	0.0135163	0.0296972	0.0108323	0.00430287	0.00606311	0.0114322	0.00485664	0.0165532	0.000307818	0.00546322	0.0236453	0.0087707	0.0377536	0.0155449	0.00632157	0.00120961	0.00498852	0.0164581	0.00561575	0.00678011	0.00868234	0.0404943	0.0301008	0.0418685	0.0126963	0.0566194	0.0135857	0.0294592	0.100764	0.037211	0.0170781	0.0250705	0.0701119	0.0891164	0.0492425	0.0213675	0.0497897	0.0619204	0.0544889	0.0774889	0.0192088	0.00905611	0.000365459	0.00637123	0.000252464	0.00093206
fraction	K01873	glyS; glycyl-tRNA synthetase beta chain [EC:6.1.1.14]	0.00445386	0.0543134	0.0199278	0.000661278	0.00822927	0.0680205	0.0239746	0.132641	0.00108245	0.0949225	0.0161017	0.0220109	0.00595636	0.00296544	0.0125119	0.0115209	0.00192231	0.00556017	0.0162404	0.00501522	0.00507725	0.00703263	0.0142793	0.00158415	0.00827991	0.00116209	0.00372519	0.00251139	0.00741846	2.4969e-05	0.00515933	0.015756	0.0027501	0.00313351	0.000297684	0.00455877	0.00467641	0.00345176	0.00176286	0.00724098	0.00393067	0.000981116		0.00163868	0.000154211	0.000289028
fraction	K01874	GARS, glyS1; glycyl-tRNA synthetase [EC:6.1.1.14]	0.0501432	0.0641383	0.0391791	0.00440506	0.0014875	0.00177952	0.0144511	0.0103378	0.0012309	0.00529818	0.00676372	0.00803479	5.9927e-05	0.00362835	0.0118947	0.00103152	0.000433344	0.00770736	0.014797	0.0132508	0.000437241	0.0103889	0.0210979	0.000495398	0.0282538	0.000384488	0.00281037	0.000626272	0.00331082	0.000130762	0.000354015	0.00159488	0.00851434	0.00334237	0.019391	0.00157884	0.00115941	0.000809528	0.000778396	0.00967869	0.00018555	0.00136567	0.000992068	0.186834	1.25301		0.00974945
fraction	K01875	PARS, proS; prolyl-tRNA synthetase [EC:6.1.1.15]	0.00739897	0.0153593	0.0101946		0.000302782		0.000966286	0.00367589	0.000117671	0.027628	0.015621	0.000494442	0.000109122	0.000559722	0.00238821		0.000383349	0.000503552	0.000894809	0.00989688	0.000579454	0.0121745	0.00550937	0.0020777	0.00452469	0.000126646	0.00103868	0.00194376	0.00207318	0.00116013	0.00241023		0.0039338	0.000650791	0.00621342	0.00116864	0.00543864	0.00121588	0.000292125		0.00365768	0.000732135	2.70109e-06	0.00142194			0.000106382
fraction	K01878	CARS, cysS; cysteinyl-tRNA synthetase [EC:6.1.1.16]	0.00791351	0.0389969	0.00982327	8.16274e-05	0.00105133	0.00046095	0.0244003	0.0138657	1.56662	0.00168816	0.00059861	0.00272767	0.0101873	0.15746	0.0294135	0.000929944	0.00118576	0.00145918	0.0405368	0.0488075	0.00164245	0.0108834	0.013453	0.000433809	0.00104716	0.000495236	0.000341565	8.17099e-05	0.00285147	0.000971919	0.000200805	0.000299994	0.00260058	0.000392029	0.00228766	0.000159433	0.000620698	0.000150494	0.000175752	0.00502097	0.0012721	0.0796033	0.000604996	0.000692239	0.000694743	0.00220041
fraction	K01879	QARS, glnS; glutaminyl-tRNA synthetase [EC:6.1.1.18]	0.00364143	0.0414371	0.0113697	0.00124268	0.0105382	0.00951377	0.0230735	0.00528527	0.00135491	0.0108287	0.00435928	0.00930821	0.0163152	0.00407605	0.00133321	0.000979109	0.00304122	0.0162502	0.0159991	0.0150348	0.00232933	0.00815335	0.00275318	0.000924392	0.000121504	9.98628e-06	0.00109724	0.00243378	0.00216282	0.000510903	0.00417958	0.0100433	0.00143601	0.00236056	0.00137029	0.000984528	0.00946886	0.00113216	0.0285903	0.00114242	0.00053856	7.96001e-05	0.00166883	0.00904073	0.000563777	0.00312127	0.000490145
fraction	K01880	RARS, argS; arginyl-tRNA synthetase [EC:6.1.1.19]		3.17093e-06	1.51521e-05		0.000114835				7.71365e-06	1.89002e-05					0.000225355				0.000230012	1.80844e-06		0.00035349	0.000191864		0.000167193		0.00355003	0.000213008	0.000183702		0.000348222	0.00194703		0.00235846	8.31863e-05	0.00202888	0.000815167	0.000196499		9.97829e-05	0.000810918	0.00253545
fraction	K01881	HARS, hisS; histidyl-tRNA synthetase [EC:6.1.1.21]	0.103076	0.178907	0.150912	0.0017246	0.00713728	0.000301839	0.0703138	0.074521	0.022089	0.0162187	0.0108761	0.059585	0.0165168	0.00192341	0.1568	0.0064171	0.0170056	0.00157326	0.0872225	0.198235	0.000467053	0.0092731	0.00532156	0.00316981	0.0046956	0.0010631	0.000576773	0.00471908	0.0312963	0.0042527	0.00153528	0.00465681	0.0205539	0.000712394	0.0264901	0.00889164	0.0230768	0.0034177	0.0032263	0.0197985	0.00227423	0.0671117	0.00254299	0.00220131	0.00438456	0.00445822
fraction	K01883	ACSL, fadD; long-chain acyl-CoA synthetase [EC:6.2.1.3]	0.0036793	0.0209265	0.0102368	0.00467074	0.000668258	0.0230811	0.00934492	0.0337854	0.0564167	0.00371749	0.00132077	0.00792429	0.0120073	0.00334112	0.0506263	0.00359949	2.98858e-05	0.0112021	0.0406992	0.0237783	0.0431449	0.0506256	0.0578825	0.00507477	0.000685985	0.000751678	0.00310767	0.00660061	0.00805203	0.0029827	0.00472643	0.0026307	0.0514927	0.0262282	0.0083833	0.00709012	0.00595621	0.00713855	0.00927958	0.0141986	0.0326301	0.0448717	8.89299e-05	0.00302704	0.00160946		4.84369e-05
fraction	K01886	LSC2; succinyl-CoA synthetase beta subunit [EC:6.2.1.4 6.2.1.5]	0.0026006	0.011529	0.0019986	0.00143175	0.00475265	7.05613e-06	0.00219981	0.0452528	0.00292047	0.00385009	0.00111214	0.00506238	0.0034447	0.0213014	0.00218793	0.000229424	0.000174162	0.00137418	0.0013383	0.00288438	0.013641	0.0110027	0.00530016	0.0188268	0.00749504	0.00857666	0.00326292	0.0217203	0.0223079	0.00297592	0.0152005	0.00619404	0.0140467	0.00467379	0.00982412	0.00235045	0.015788	0.0101124	0.0279428	0.0436498	0.0237821	0.00100758			7.34795e-05	0.000373316
fraction	K01887	sucD; succinyl-CoA synthetase alpha subunit [EC:6.2.1.5]	0.0166061	0.0234101	0.0223865	0.00913241	0.00376059	0.00254875	0.00920342	0.0757304	0.000441677	0.00591583	0.0128808	0.0142215	0.0290085	0.0116959	0.000761162	0.00234753	0.047422	0.0114891	0.00777396	0.00915211	0.00110443	0.00587977	0.0069322	0.000178883	0.00130444	0.000620045	0.000488196	0.00247008	0.00207337	1.43614e-06	0.00316175	0.0606178	0.0110546	0.00463198	0.00168064	0.00032769	0.00173401	0.0052446	0.00467473	0.00523726	0.0017103	0.00411317	0.000471231	0.0055152	0.000789808	0.00110037	5.70595e-05
fraction	K01892	sucC; succinyl-CoA synthetase beta subunit [EC:6.2.1.5]	0.0311894	0.0854875	0.257674	0.00326315	0.011769	0.0107173	0.0963026	0.0331396	0.0148992	0.0730502	0.0801082	0.0404593	0.000672949	0.0810106	0.0342724	0.0142009	0.00464535	0.0779525	0.129657	0.0557562	0.0179953	0.0158527	0.0279636	0.00228461	0.00405519	0.00137862	0.00270055	0.00587919	0.00616148	0.000201925	0.00387112	0.00625652	0.00185981	0.00072422	0.0050268	0.00430825	0.00297733	0.0018508	0.00473438	0.0117418	0.00662559	0.00140268	0.000778916	0.00329806	0.00144606		0.000470864
fraction	K01897	AACS, acsA; acetoacetyl-CoA synthetase [EC:6.2.1.16]	0.0339251	0.0792304	0.0600281	0.00777727	0.0270412	0.00521927	0.0592829	0.0745905	0.590091	0.0373029	0.0550091	0.0606456	0.0288749	0.0320982	0.0591639	0.0130622	0.0412068	0.0348543	0.0471502	0.174528	0.0377	0.125193	0.199273	0.172944	0.0648145	0.0327826	0.0456659	0.0912249	0.0421679	0.0102043	0.0880579	0.807723	0.0446472	0.0560387	0.073427	0.0136789	0.183589	0.132442	0.100302	0.0609685	0.041343	0.0433649	0.00210872	0.00954634	0.00289997	0.000596637
fraction	K01900	ACSS3, prpE; propionyl-CoA synthetase [EC:6.2.1.17]	1.82275e-05	0.000322002	0.000877271		0.000252576		7.23887e-05	0.000223962		1.18294e-05				0.000224415	0.000716907	4.08969e-05	8.9735e-05	0.000171554		0.000135025				8.33723e-05		0.000293555	0.00235298	4.6424e-05	0.000567303	0.000147479	0.000597501	0.000507067	0.000108411	0.00121082	0.000421882		0.000436848	0.000501911	0.000383298	0.000734492	5.92836e-05	0.00690326	0.00132351	0.00139959	0.000181159	0.173007	0.0105791
fraction	K01902	glnA, GLUL; glutamine synthetase [EC:6.3.1.2]	0.167864	0.387593	0.808473	0.0336273	0.0793614	0.0861709	0.294179	0.168941	0.0930568	0.196008	0.547344	0.111964	0.491387	0.127046	0.212733	0.0195341	0.0862728	0.0941984	0.236286	0.449944	0.259772	0.534413	0.539315	0.115708	0.0727702	0.0847223	0.0359682	0.0678537	0.258033	0.0114839	0.0435526	0.135755	0.193367	0.281083	0.0679043	0.047323	0.113531	0.0853206	0.100866	0.172347	0.0972271	0.0643616	0.00406741	0.0520111	0.0400822	0.0276276	0.00112231
fraction	K01903	nadE; NAD+ synthase [EC:6.3.1.5]	0.147318	0.162657	0.147081	0.197961	0.617309	0.934217	0.159905	0.489934	0.0149553	0.208891	0.693057	1.18831	0.470732	0.143098	0.0424063	0.0313879	0.153598	0.37492	0.213606	0.185157	0.549869	0.791472	0.796184	0.452877	1.69388	0.895377	0.0655357	0.219126	0.331873	0.0379709	0.243603	0.498371	0.960893	1.77466	0.188785	0.0444859	0.0840825	0.100571	0.201289	0.385217	0.123371	0.135294	0.0307836	0.224843	0.149229	0.0330357	0.0669315
fraction	K01907	gshA; glutamate--cysteine ligase [EC:6.3.2.2]	0.00260127	0.00133346					0.000319633	0.00211868	7.67567e-06	0.0001844	0.000889226	0.000591122		0.000687043	0.000135376	0.000187771	0.00151453	0.00750773	0.000104042	0.000159093	0.0308317	0.00362117	0.0098318	0.000284859	0.00116236		0.00316405	0.00272185	0.00368582	1.60026		0.00377147	0.0162407	0.00525956	0.00242047	0.0324286	0.00435445	0.00143621	0.00208829	0.00102587	0.0187145	0.00131621	0.00157697	0.000122253	0.000184684	0.00110478
fraction	K01908	gshB; glutathione synthase [EC:6.3.2.3]	0.0100507	0.0375801	0.0119716	0.00163743	0.00444896	0.014264	0.0139457	0.0110783	0.000981625	0.00520623	0.00660307	0.00712141	0.0318424	0.00612066	0.003488	0.00095122	0.0136637	0.0128285	0.0116733	0.0145335	0.0126786	0.00437924	0.00957693	0.010465	0.0394993	0.0147228	0.0043306	0.0108954	0.0161209	0.0007866	0.467302	0.00322318	0.00606676	0.00542245	0.00426697	0.00393485	0.0105996	0.0092246	0.010397	0.0132974	0.00222462	0.00501751	1.02222	0.0798725	0.120661	0.721797
fraction	K01915	purC; phosphoribosylaminoimidazole-succinocarboxamide synthase [EC:6.3.2.6]	0.351873	0.373725	0.15617	0.553293	0.500349	0.461781	1.23104	1.48283	0.37566	1.26627	1.73652	0.977165	0.897824	2.3262	0.890664	0.217486	0.422972	2.20806	1.13239	1.88524	0.346151	1.75329	2.36616	0.4494	0.484429	0.324757	0.677461	0.673365	0.803508	0.1941	0.683885	0.841302	3.49106	1.4092	0.602551	0.338388	0.665734	0.472475	0.625681	0.733796	0.510867	1.09363	0.0326772	0.392738	0.208914	0.148725	0.0447235
fraction	K01916	murC; UDP-N-acetylmuramate--alanine ligase [EC:6.3.2.8]	0.00412217	0.0563247	0.0103813	0.0565224	0.00191162	0.051408	0.0277434	0.00938782	0.00158455	0.0230183	8.83595e-06	0.00439253	0.0256589	0.0108362	0.0241503	0.0480291	0.013158	0.00201029	0.0199614	0.0488452	0.00388425	0.00190212	0.00233705	0.00268759	0.00256865	0.00149734	0.000254972	0.00424475	0.00289732	4.01049e-05	7.06899e-05	0.000304315	0.00819729	0.000293748	0.00100864	0.000339721	0.00109293	0.000942658	0.00308465	0.0041603	0.00207717	0.000872272	6.3123e-05	0.00178815
fraction	K01919	murD; UDP-N-acetylmuramoylalanine--D-glutamate ligase [EC:6.3.2.9]	0.00628346	0.00803299	0.00395527	8.81674e-05	0.0100582	0.0345352	0.00485859	0.0050551	0.000248451	0.0149808	0.000508234	0.0202467	0.000777843	0.0359085	0.00241846	0.00121498	0.0283404	0.0108862	0.00789218	0.0049423		0.00173805	0.0023645					0.000313117	0.000786534			0.000363655			0.00135379				2.88637e-05	0.00102541		0.000442282
fraction	K01920	murE; UDP-N-acetylmuramoyl-L-alanyl-D-glutamate--2,6-diaminopimelate ligase [EC:6.3.2.13]	0.00484313	0.0103962	0.000895481			0.00330964	0.00168314	0.00181444	0.000120247	0.00116239	0.00685239	0.000756844		0.0526738		9.17142e-06	0.00250179	0.00280488	0.00194055	0.00631308	0.00471734	0.0187345	0.0274739			6.84631e-05	0.000867406						0.000280801	0.000860412		0.000858318	5.4811e-05			0.000447768	2.03859e-05	0.00134451		0.00178513	0.00230754		0.000309539
fraction	K01923	fhs; formate--tetrahydrofolate ligase [EC:6.3.4.3]	0.00536905	0.0189318	0.0259423	0.000959896	0.0145089	0.00453657	0.0317336	0.0134635	0.00139258	0.0159237	0.00951906	0.057174	0.0948811	0.0225845	0.00237705	0.00149389	0.00131503	0.240852	0.0116793	0.0158143	0.00203054	0.0887992	0.0656878	0.31236	0.556628	0.620729	0.00536029	0.563824	0.286163	0.000167614	0.84479	0.00467995	0.00502673	0.0193327	0.425192	0.00711601	0.184016	0.523948	1.10874	0.383988	0.00566512	0.0130334	0.000137718	0.00142032	0.00173571
fraction	K01924	purD; phosphoribosylamine---glycine ligase [EC:6.3.4.13]	0.00330254	0.00415319	0.00239282	0.0040991	0.00125784		0.0025849	0.00271846	0.0176342	0.000922232	0.00142324	0.0101705	2.08764e-05	0.00109987	0.00285947			0.00481063	0.00278784	0.00270992	0.000489216	0.00046779	0.000640683	0.00117688	0.000175248		0.00401505	0.000721556	0.00098781	7.46636e-05	0.000462215		0.00113602			0.000411199	0.001425	0.000792801	0.000112363	0.000193098	0.000707654	2.86219e-05	2.21523e-05	0.000114271
fraction	K01925	gmaS; glutamate---methylamine ligase [EC:6.3.4.12]	0.000854179	0.000380053					4.75293e-06	0.00160376	1.42404e-06	0.0001549		2.65332e-05	0.000198611	4.27066e-05	1.78286e-05	0.000980629	9.44463e-05		1.09113e-05	7.20934e-06																	0.000379228	0.000186295					0.00021586	0.00318972	0.00643023
fraction	K01928	guaA, GMPS; GMP synthase (glutamine-hydrolysing) [EC:6.3.5.2]	0.0139151	0.0352595	0.0225603	0.0365087	0.0001484		0.0114224	0.00508315	0.0010327	0.00595053	0.00682688	0.00406736	0.00372023	0.00133402	0.00351482	0.00083512	0.00259758	0.00309233	0.0150989	0.0241819	0.00450252	3.33443e-05	0.000100266		0.00487642	0.00103863	6.70331e-05	0.000262078	0.00141597	0.000312204	0.000356096	0.000578321	0.000315673	0.00143111	0.00265221	5.451e-05	0.000435395		0.00222755	0.00343666	0.000304618	0.000447093	2.3879e-05	0.000183479	1.46962e-05		2.48433e-05
fraction	K01938	carB, CPA2; carbamoyl-phosphate synthase large subunit [EC:6.3.5.5]	0.0127931	0.0325469	0.0489618	0.00564517	1.69768e-05	0.000352666	0.014623	0.115743	0.000298075		0.436154	0.775817		0.0279277	5.65579e-05	0.000155611	0.138039	0.0709364	0.0217472	0.00206379	0.0473358	0.113161	0.387051	0.0570253	0.000655513	0.00896026	0.0171183	0.011838	0.0250339	0.000780331	0.00959504	0.018295	0.0423091	0.0125605	0.111674	0.0211724	0.116501	0.0968703	0.0379878	0.0484204	0.0192525	0.0407641				0.000229439
fraction	K01945	carA, CPA1; carbamoyl-phosphate synthase small subunit [EC:6.3.5.5]	0.00117542	0.0542106	0.0590744	0.00268362	0.0147205	0.0110105	0.177832	0.0100285	0.00935488	0.00571364	0.0214213	0.0152305	0.0229195	0.00505636	0.0724755	0.00396889	0.00783677	0.0105915	0.100729	0.0843845	0.00509042	0.0119505	0.0127094	0.042741	0.00041173	0.000927446	0.00235561	0.0533336	0.104782	0.00339139	0.00134918	0.00237969	0.00245685	0.00238674	0.00194039	0.000250673	0.0264536	0.00351553	0.0625863	0.0745843	0.000983558	0.000659864		0.000577037
fraction	K01949	PC, pyc; pyruvate carboxylase [EC:6.4.1.1]					1.00837e-05		8.86104e-05				0.00236326								0.000108847	0.000636917	0.0402637	0.0447216	0.0506326	0.0825874	0.0280775	0.0395215	0.00533076	0.000217333	0.0307208	0.00071479	0.117767	0.0205595	0.00247601	0.00384613	0.0610311	0.00511338	0.245384	0.203669	0.0206783	0.102978	0.00625678	0.10145		0.0229486
fraction	K01951	pycB; pyruvate carboxylase subunit B [EC:6.4.1.1]	0.10278	0.115432	0.0781603	0.00588684	0.00830863	0.0187702	0.0217748	0.0288206	0.00560567	0.0186481	0.0184992	0.0355235	0.00680476	0.0102932	0.0141671	0.00233683	0.00977315	0.00781708	0.0169333	0.0243688	0.0145548	0.250996	0.285058	0.0363011	0.0383093	0.0409414	0.02007	0.0826747	0.0372142	0.00863362	0.0567662	0.0471912	0.0465301	0.0959545	0.0287713	0.0166621	0.0586816	0.0318889	0.0462161	0.0691587	0.0111111	0.0340652	0.00380264	0.0811614	0.0383417	0.0120197	0.0116372
fraction	K01955	accC; acetyl-CoA carboxylase, biotin carboxylase subunit [EC:6.4.1.2 6.3.4.14]	0.00781179	0.0303056	0.0157091	0.0236881	0.0239819	0.0705952	0.0874567	0.0398154	0.112061	0.0379854	0.0217771	0.0540422	0.0261831	0.0146465	0.0183975	0.0185082	0.0810586	0.0355751	0.0483043	0.0452366	0.0765397	0.104973	0.105018	0.164633	0.0230932	0.0916519	0.27224	0.0458534	0.0437723	0.051273	0.0279138	0.182972	1.32416	0.274989	0.0531989	0.038313	0.0539403	0.0487875	0.0257319	0.0349105	0.0228893	0.230109	0.0429804	0.0306313	0.00679543	0.0241382	0.0751416
fraction	K01956	accD; acetyl-CoA carboxylase carboxyl transferase subunit beta [EC:6.4.1.2 2.1.3.15]	0.00308229	0.0246607	0.00316985	0.00345119	0.00900559	0.00010596	0.0449423	0.0590539	0.00206147	0.0187664	0.0420769	0.0165912	0.000234779	0.020036	0.0218627	0.0112388	0.0101954	0.0105009	0.0171538	0.0323707	0.0228351	0.0500661	0.0438971	0.0213771	0.00384247	0.022119	0.0194453	0.0296395	0.052211	0.00129761	0.0330705	0.0210477	0.0198657	0.0310581	0.0321291	0.00443195	0.0172528	0.00124205	0.0403947	0.0396471	0.00664259	0.0405814	4.38995e-05	0.0191762	0.00340133	0.00313185	4.52817e-05
fraction	K01958	PCCB, pccB; propionyl-CoA carboxylase beta chain [EC:6.4.1.3 2.1.3.15]	0.000118119	0.00023629	0.00120301		0.000347705		0.000921854	0.000337944	0.00111701	0.000324417	0.000456307	0.00220585	0.000579154	0.000151933	0.00101836	1.238e-05	7.37012e-06	0.000629756	0.00014918	0.000228338	0.00048164	0.00233652	0.00105506	0.00072125	0.00116588	0.000533795	0.000754376	0.00101838	0.00237945		0.00023845	0.00186715	0.00289133	0.00263327	0.00078133	0.000113796	0.00137906	0.00137278	0.00071122	0.00154613	0.00039943	0.000225865	1.11226e-06	0.000710853	5.18825e-05		0.000976033
fraction	K01960	E6.4.1.4A; 3-methylcrotonyl-CoA carboxylase alpha subunit [EC:6.4.1.4]	0.0020532	0.00406074	0.000112381		0.000152739		0.0328921	0.00576544	0.00152887	0.00142782	0.0130292	0.00375519	0.000173058	0.00257268	0.0580931	0.000556152	3.88348e-05	0.00433971	0.0217219	0.00129613	0.0044555	0.00563089	0.0027737	0.0013358	0.000789837	0.000876515	6.60508e-05	0.000400675	0.000318661	9.66061e-05	0.000522526	6.41285e-05	8.74134e-05	0.000653933	2.44061e-05	5.58886e-05	0.00409611	0.00267851	0.000792259	0.00162351	0.000639957	0.00106007
fraction	K01961	E6.5.1.2, ligA, ligB; DNA ligase (NAD+) [EC:6.5.1.2]	0.0402802	0.190273	0.0526613	0.0222055	0.107381	0.0152365	0.0791057	0.0518187	4.00548	0.0271125	0.135623	0.0969609	0.0716433	0.0176177	0.0251385	0.00449713	0.0532675	0.0531166	0.0918442	0.102324	0.0479347	0.192765	0.209346	0.0179447	0.0352801	0.0312358	0.0220706	0.0351218	0.0544801	0.00689148	0.00799391	0.0664717	0.0527234	0.0649477	0.0610131	0.0377713	0.027754	0.0221196	0.0236304	0.0346379	0.0232635	0.0337454	0.0028425	0.023221	0.00749989	0.00377915	0.0148979
fraction	K01963	wza, gfcE; polysaccharide biosynthesis/export protein	0.115039	0.314816	0.161972	4.79966e-05	0.00701307	4.68539e-05	0.886723	0.047357	0.0462626	0.00953616	0.5712	0.0824875	0.0716619	0.151887	0.523791	0.0251991	0.0188676	0.0461831	0.939925	0.803878	0.195531	0.0380962	0.0425564	0.0713345	0.0323084	0.0372347	0.076611	0.0764503	0.138725	0.0609424	0.027429	0.123825	0.0323062	0.0298714	0.145582	0.102321	0.0911229	0.0411068	0.0744473	0.0573759	0.140845	0.716297	0.000305876	0.000624514	0.000424682	0.00131013	0.000912543
fraction	K01966	livG; branched-chain amino acid transport system ATP-binding protein	0.000674398	6.97716e-06	0.000182237	0.00610427		0.014854	0.000663279	0.00117393	0.000110319	0.000245101		0.0145368	0.0128474	4.1647e-07		2.02815e-05		0.000891487	0.000442526	0.000510323	0.0304556	0.011541	0.0212132	0.000998786	0.0022744	0.000255492	0.0169551	0.000350892	0.00130657	0.00144625	0.0100985	0.00895846	0.0027718	0.00252458	0.00027208	0.0316209	0.00268603	0.00118125	0.000454365	0.00172872	0.026341	0.068313	0.0252537	0.0153382	0.0418749	0.00235037	0.00524598
fraction	K01968	livF; branched-chain amino acid transport system ATP-binding protein	0.000585846	0.00290188	0.000606351	0.00217517	0.000163767	8.52328e-06	0.00353966	0.00723014	0.00910982	0.000927493	0.000352331	0.000839707	0.00788114	0.00146493	0.00117999	0.000804297	0.00294805	0.000491876	0.00326889	0.00201406	0.00107744	0.0173248	0.0241687	0.00473142	0.010277	0.00444634	0.000826935	0.00311496	0.00435904	0.0131623	0.00462821	0.0111723	0.0244909	0.00976944	0.00213585	0.0012264	0.00199006	0.00356074	0.00221587	0.00399877	0.000730582	0.000970926	2.32944e-05	0.00110231	1.58231e-05	0.000348926	0.0022131
fraction	K01972	livM; branched-chain amino acid transport system permease protein	1.06166e-06	8.02952e-05	0.00123658		8.6805e-06		0.000787265	0.000207495	7.4419e-05	7.20254e-06	0.0012806	1.65393e-05		1.0922e-06	1.62724e-05			1.79345e-05	6.80914e-05	0.000104705	0.000464049		0.000184879	0.00864186	0.0161905	0.0115628		0.00186892	0.0015548	0.000866696	0.0142793	0.000125195	0.000156422	0.0244208	0.0002431		0.0024215	0.0292761	0.000247838	0.00235918	4.00033e-05
fraction	K01991	livK; branched-chain amino acid transport system substrate-binding protein	0.0157791	0.0211124	0.0168699	0.00661461	0.0405534	0.117671	0.0459958	0.0803546	0.0116661	0.208444	0.45593	0.216344	0.294098	0.397341	0.0407533	0.0131069	0.0223681	0.240729	0.0346799	0.0343196	0.00423108	0.0406041	0.0572464	0.0142324	0.0084709	0.0116136	0.00900694	0.0166839	0.0151338	0.00333782	0.00899583	0.146211	0.0731162	0.00884079	0.0128557	0.00340126	0.00912905	0.00923226	0.0471305	0.0186797	0.00601175	0.0537668	0.000390448	0.00731734	0.00626167	0.0021809	0.00121748
fraction	K01995	proV; glycine betaine/proline transport system ATP-binding protein [EC:7.6.2.9]	0.00537338	0.00365198	0.00356268		0.060609	0.00654721	0.00113632	0.016635	0.000421773	0.00580765	0.00116138	0.0332482	0.0193166	0.0409949	0.01491	0.00444654	0.00370904	0.00528702	0.000377579	0.00189597	0.000221592	0.00809851	0.00589635	0.000210107	0.00159924	0.000539458	0.00133741		0.00053432	0.000679657	0.000363232	0.000219433	0.00151667	0.00147363	0.000804265	0.00691378	0.00162627	0.000871966	0.000482598	0.000214109	0.00122499	0.00480488		5.27005e-05
fraction	K01996	proX; glycine betaine/proline transport system substrate-binding protein	0.00241604	0.00416768	0.00418376		0.0177334	0.00345482	0.00154878	0.00493381	7.37177e-05	0.000573545	0.000683183	4.31656e-06	0.000164764	0.000144802	0.00327569	4.27857e-06		0.0217263	0.0020422	0.00622426	4.21375e-05	0.00443422	0.00393347	5.28028e-05			0.00076593	9.9912e-05	0.000320869		7.93936e-06	0.000274134	0.000458828	0.000103149	0.000242705	4.69043e-06	0.000111953	3.84632e-05	3.41515e-05	7.45687e-06	0.00146016	2.83331e-05
fraction	K01998	ABC.CD.A; putative ABC transport system ATP-binding protein		3.40442e-05			0.0354685		0.00041487	0.00158198	0.000203251	0.00094731	6.29373e-05	0.00014401		5.0247e-05	0.00183061	0.000355823		4.64099e-05	0.000319926	0.000532982									0.000650395		0.00173603						0.00236622	0.00380156	0.000850423	0.000984629
fraction	K01999	ABC.CD.P; putative ABC transport system permease protein	0.0311077	0.0269109	0.0348397	0.0322969	0.27681	0.0405099	0.0926764	0.281106	0.00262569	0.0565431	0.581032	0.384253	0.126736	0.119915	0.286736	0.0175965	0.0368793	0.145833	0.0528789	0.0400323	0.962516	0.961462	0.691791	1.42708	0.708623	0.600216	0.948833	0.292075	0.219109	0.182647	0.300272	0.700941	0.740702	0.675778	0.330833	0.358009	1.62888	1.11607	0.351222	0.349721	0.955129	0.810597	0.0472281	0.11356	0.0523159	0.0776742	0.0148094
fraction	K02000	ABC.CD.TX; HlyD family secretion protein		1.32385e-05	5.61155e-05		1.48638e-05		1.54476e-05	7.80602e-05	9.18216e-08	0.000358013	0.00210824			0.000187389	6.79988e-05		5.70748e-05	2.77009e-05	2.13201e-05	0.000204586	0.000572175	0.0048575	0.000261856	0.00651135	0.00881585	0.00648944	0.0363633	0.010089	0.0016692	0.0134814	0.00298692	0.0119274	0.00239403	0.0516611	0.00104487	0.0172566	0.0156873	0.0130036	0.00950465	0.00467245	0.0274182	0.0296569
fraction	K02002	afuA, fbpA; iron(III) transport system substrate-binding protein	0.0147234	0.067585	0.0371471	0.0369285	0.112684	0.13589	0.0909633	0.0815292	0.318717	0.377716	0.107627	0.600012	0.2129	0.0769491	0.502492	0.0707641	0.0261117	0.0652349	0.0608489	0.0974586	0.223972	0.73416	1.0535	1.50453	0.569529	0.369802	2.40574	0.23069	0.157965	0.693074	0.366587	0.401255	0.356626	0.385333	0.188298	0.570593	2.11006	1.6687	0.32677	0.351717	3.14674	2.14091	0.113181	0.030485	0.180334	0.0328527	0.0292606
fraction	K02003	TC.FEV.OM; iron complex outermembrane recepter protein	0.0024454	0.00279776		0.00737616		0.00222292	0.000249006	0.000212153	0.00705372	0.000104495			0.0012748	0.0151598	9.16014e-05			0.00836335	0.000172502	0.000592182	0.00445437	0.00119581	0.00119682	0.00830707	0.0012488	0.0017691	0.00856899	0.00136833	0.0159286	0.000889824	0.00241305	0.0902035	0.00799102	0.0178233	0.00858732	0.00207896	0.00833912	0.00607223	0.000326809	0.00886492	0.0142905	0.000791209	2.10979e-05	0.00207457		0.000155239
fraction	K02004	ABC.FEV.S; iron complex transport system substrate-binding protein	0.0118219	0.00496558	0.00337326		0.00310747	0.000121263	0.000793652	0.00208414	0.000286373	0.0118297	0.00127794	0.00210702		0.0096011	0.00576368	0.00301466	0.0187678	0.00516212	0.00463245	0.000936773																								7.02064e-06
fraction	K02005	ABC.MR.TX; HlyD family secretion protein							1.35044e-05	0.000123034		9.08457e-06		6.06532e-05								3.63263e-05				0.000539215	1.48e-05		0.00263674	0.000185808	0.000341641	0.000107116	0.000146538	0.000207095	0.000534522	2.51533e-05		2.85857e-05	0.000186687	0.000194976	7.19811e-05		0.00152034	0.000203693
fraction	K02012	ABC.MS.S; multiple sugar transport system substrate-binding protein	0.0095071	0.0103535	0.0106436	0.0332206	0.203845	0.0491078	0.0109813	0.0738255	0.00215653	0.0280269	0.545016	0.173447	0.0988007	0.0229188	0.015749	0.0203192	0.0279432	0.0770638	0.00818049	0.0412256	0.0346054	0.064756	0.097331	0.128665	0.311905	0.300957	0.109233	0.0591612	0.0997138	0.0136227	0.0403753	0.0514727	0.046404	0.0870609	0.373541	0.0106261	0.0709318	0.100248	0.015527	0.125838	0.136494	0.0924063	4.53691e-05	0.000895361		0.000365429
fraction	K02014	ABC.PA.P; polar amino acid transport system permease protein	2.26497	1.16127	0.658815	0.938187	0.821232	3.29914	1.0003	1.59691	0.791362	7.69886	3.28086	3.90503	4.21468	8.07333	1.56263	0.264622	1.73736	7.11271	1.25687	0.491815	0.69587	0.569785	0.647825	0.927958	1.18652	0.917129	0.424298	1.42313	2.20994	0.194012	0.494041	1.92785	1.15546	1.00297	0.959431	0.285365	1.75889	1.29467	1.17005	1.71343	0.340243	0.493263	0.121271	0.567675	0.331995	0.181479	0.0706096
fraction	K02016	ABC.PA.S; polar amino acid transport system substrate-binding protein	0.000190305	0.000138616	0.000426248	0.000170179		0.000162328	0.000879274	0.00588923	5.57473e-05	0.000311947	0.000681827	0.00139504	2.63036e-05	0.00220105	0.000456171	8.18485e-05	0.000873571	4.96282e-05	0.000450416	0.000383064		3.95242e-05	2.24232e-05					0.000220363	5.94061e-05	1.66219e-05		0.000357562			0.000817627		7.71334e-05		8.16013e-05
fraction	K02022	ddpF; peptide/nickel transport system ATP-binding protein																								0.0188112	0.0436776	0.0891877	0.000196943	0.0355398	0.0454204	0.000193203	0.0357877	0.000196937	0.00268749	0.00273096	0.0150044	0.000177388	0.0303731	0.0612107	0.0163801	0.0614992	0.00156568	0.0026857	0.000334652	1.68565e-05	0.000756413	2.11185e-05
fraction	K02027	ABC.PE.S; peptide/nickel transport system substrate-binding protein	0.000407205	0.00175257	0.00387824	0.000808328	0.0242603	0.00516804	0.00653516	0.0204346	0.000306331	0.0410708	0.0163738	0.0410653	0.00514417	0.102128	0.0832512	0.00732792	0.00334	0.0275793	0.00134405	0.00293624	0.807976	0.157264	0.273042	0.419599	0.24851	0.174423	0.364976	0.0975196	0.104987	0.0664418	0.113887	0.181082	0.503749	0.59872	0.135299	0.0924897	0.562413	0.388062	0.105932	0.111972	0.346063	0.230099	0.00960071	0.0369436	0.00729121	0.0377304	0.0191223
fraction	K02029	pstB; phosphate transport system ATP-binding protein [EC:7.3.2.1]	0.0116681	0.00213471	0.00589392	0.000696488	0.00605594	0.0124891	0.00359634	0.0284375	0.000170192	0.00230883	0.0203771	0.0427576	0.00370654	0.0297494	0.00167059	0.00116177	0.00192683	0.09296	0.00195094	0.00337276	2.42573e-05	0.00480179	0.0156636	0.000280538	0.0003912	0.00204345	0.000753575	0.000819232	0.000364746	0.00047069	0.00535781	0.000628941	0.00106683	0.000416401	0.00207981	6.08064e-05	0.00168921	0.000319838	0.00202993	0.000100076	0.000773353	0.000684263	1.79774e-05	2.36067e-05	0.00034137
fraction	K02030	phoU; phosphate transport system protein	0.037578	0.0230529	0.0208449	0.0512361	0.0655524	0.117548	0.0212614	0.296032	0.0106885	0.18314	0.116346	0.0909963	0.233131	0.15469	0.12164	0.0195919	0.0224073	0.58129	0.0162465	0.0200752	0.0956001	0.0611884	0.0672588	0.384712	0.150546	0.140132	0.346805	0.155088	0.0511358	0.0719826	0.405706	0.0997807	0.101704	0.0946818	0.0364132	0.195246	0.490843	0.357868	0.350199	0.0684559	0.3095	0.195793	0.000884469	0.0113714	0.0177523	0.00110159	0.000831142
fraction	K02032	pstS; phosphate transport system substrate-binding protein	0.000529491	0.00195973	0.000120331			0.000294911	0.00396994	0.00185069	0.000140341	0.000117652	0.000462081	0.000818312		0.000337129	7.50974e-05			0.00232533	0.00213719	0.00266831	0.00371048	0.084452	0.074279	0.0029279	0.00916202	0.00547949	0.00531186	0.0272614	0.00590351	0.013249	0.0817109	0.1149	0.117184	0.491397	0.0156652	0.0187893	0.0108595	0.00398698	0.00811366	0.000534286	0.0047044	0.0051248
fraction	K02035	phnD; phosphonate transport system substrate-binding protein	0.0149446	0.0131571	0.0507945	0.0399593	0.251609	0.109751	0.0354837	0.0799413	0.17083	0.128476	0.256619	0.323099	0.136047	0.161963	0.0288329	0.0187356	0.074306	0.0612892	0.0213788	0.102988	0.784914	0.504711	0.706225	1.51215	1.10041	1.50605	1.80466	0.693694	0.287337	0.452195	0.979123	0.907323	0.901815	0.687901	0.210691	0.42615	1.82309	1.34828	0.585625	0.430725	1.63035	1.09952	0.00882255	0.0221162	0.10924	0.0189579	0.00651803
fraction	K02036	ABC.SP.A; putative spermidine/putrescine transport system ATP-binding protein	0.0100906	0.0432549	0.00413362	0.000544992	0.0119741	0.00446168	0.0104036	0.00532309	0.00966863	0.217635	0.108866	0.0135353	0.00327608	0.410943	0.0315534	0.00320672	0.0878327	0.139373	0.00461367	0.00800481	0.170957	0.394042	0.368672	0.0142378	0.0139636	0.011304	0.0111603	0.0037549	0.0102785	0.00234474	0.00479899	0.0091376	0.015734	0.0140498	0.00406575	0.00871848	0.0129894	0.00864664	0.00738793	0.00566218	0.0105393	0.0182264	0.0460648	0.502108	0.231331	0.787659
fraction	K02039	ABC.SP.S; putative spermidine/putrescine transport system substrate-binding protein	0.00173061	0.00051654	0.000488979			0.000664489			0.000156837		0.000796012										0.025659	0.0200814	0.0250709	0.00178717	0.00110643	0.00200196	2.51882e-05	0.000286393	0.00127824	0.000107439	0.00325703	0.00205425	0.00474357	0.00805972	0.000371891	5.30088e-05	0.00154933	0.000660124	0.00074082	0.00020924	0.000260878	0.00187814	0.00450458	0.0285024	0.0190895	0.00179856	0.00338867
fraction	K02040	ABC.SS.S; simple sugar transport system substrate-binding protein	0.0439665	0.0170353	0.150855	0.0296057	0.298622	0.0631835	0.0541999	0.152062	0.0436033	0.0812339	0.288623	0.0795968	0.204319	0.0376198	0.152092	0.0105785	0.238985	0.205526	0.0306673	0.0819801	0.607297	1.66385	1.79885	0.294313	0.199402	0.218972	0.0759547	0.0535083	0.158415	0.0159957	0.185586	0.117516	0.13718	0.186907	0.0697724	0.0436823	0.0865355	0.0746732	0.0843467	0.0645936	0.142077	0.221681	0.0782823	0.418434	0.311939	0.112011	0.0404439
fraction	K02044	metQ; D-methionine transport system substrate-binding protein	0.00129165	0.00816925	0.164289	0.000783379	0.00482747	0.00727316	0.157277	0.0144146	6.67173e-05	0.0159375	0.00338013	0.00610663	0.00424434	0.00445897	0.00225504	0.000380204	0.299335	0.0375409	0.00279718	0.00310922	0.0102978	0.0708581	0.0690614	0.105099	0.0366923	0.0387279	0.06458	0.0211934	0.0359646	0.0162738	0.0291828	0.0422951	0.141454	0.110546	0.0167668	0.0141811	0.168747	0.143535	0.0314414	0.0310162	0.211266	0.362173	0.00307892	0.018444	0.0122174	0.0119785	0.000508555
fraction	K02052	ABC.ZM.S; zinc/manganese transport system substrate-binding protein		0.000502473					8.62216e-05	0.00165929		0.000548077		0.00506921				0.000157393		0.00104813	5.89042e-05	0.000113315	0.00945937	0.0158995	0.0189959	0.0364319	0.0180814	0.0126372	0.036399	0.0220524	0.0124343	0.00835417	0.0157198	0.00799233	0.0166781	0.0883289	0.0218794	0.010707	0.152287	0.090086	0.0245087	0.0213568	0.0447006	0.0488944		0.00689468
fraction	K02055	acpP; acyl carrier protein	0.00345275	0.0287388	0.0022961	0.0425081	0.0640489	0.00568518	0.00931916	0.0320621	0.00709316	0.070719	0.00915518	0.36121	0.85206	0.0360541	0.243975	0.0309884	0.0586455	0.0310959	0.0122578	0.0127084	0.324463	0.233339	0.293546	1.27468	1.56357	2.2754	0.962239	1.01683	0.587765	0.166043	0.190244	0.217477	0.346537	0.290151	0.29654	0.221781	1.50661	1.40161	0.917736	0.792858	0.938627	0.735765	0.0048303	0.00957606	0.00490081	0.016203	0.00804898
fraction	K02058	apcE; phycobilisome core-membrane linker protein	0.00197504	0.00535492	0.00779537	0.00174287	0.00555273	0.001548	0.0164884	0.00927053	0.016574	0.00519162	0.0211952	0.0324461	0.00377212	0.00281908	0.0596305	0.00284539	0.0034808	0.0368005	0.0117227	0.0087102	0.191359	0.157834	0.160423	0.306618	0.263019	0.197033	0.296209	0.0458709	0.0860349	0.0479184	0.0613765	0.443413	0.314917	0.328579	0.146261	0.338762	0.447778	0.315834	0.0773325	0.0876456	0.306535	0.177974	0.00774478	0.0290487	0.0278028	0.0214135	0.0347407
fraction	K02073	apcF; phycobilisome core component	0.00189417	0.000861589	0.00166732	0.0125781	0.0166351	0.0122076	0.0200757	0.0451679	0.0102659	0.0097639	0.000723549	0.0361839	0.0150994	0.0106999	0.780004	0.00382585	0.014861	0.0141866	0.0230382	0.017422		0.00162001	0.000534554	0.00196791	0.00137383	0.00135273	0.000393406	0.00155063	0.000564684	3.21284e-05	0.00100802	0.00321667		0.00392521	1.70561e-06		0.000550511	0.000340546	0.000222012		0.0628281	0.00906455		0.000539425
fraction	K02077	CTNNB1; catenin beta 1		5.04144e-05								7.25968e-05										3.27415e-05																							0.000172362	0.00454461	0.00897897	0.0148264	0.000802178
fraction	K02078	ATPF0B, atpF; F-type H+-transporting ATPase subunit b	0.00889308	0.00345483	0.00260588	0.0208051	0.0321231	0.00395064	0.0147709	0.0272304	0.00197672	0.0647057	0.0503086	0.0617363	0.0121025	0.138678	0.0170922	0.0100526	0.00264263	0.0545818	0.0340232	0.0132938		0.000311906	0.00038305			0.000303966		0.0002002	0.00167716			0.000158701	0.000700781	0.000204666			0.000559109	0.000918949		0.000225408			0.000982028	0.00318942	0.00912715	0.00204144	0.000176803
fraction	K02096	ATPF1D, atpH; F-type H+-transporting ATPase subunit delta																					0.000737513	0.000530092	0.000297715	0.000714314	0.000641424	0.00046745	2.12498e-05	0.000105676	0.000449381	9.05971e-05	0.000987733	0.000365245	0.00135118	0.00997702	0.0178718	6.91225e-05	0.00218882	0.00212034	0.00018343	0.00101701	8.23622e-05	0.00020129	0.00019998	0.00153934	0.00026989	0.00175533	0.00713898
fraction	K02097	ATPVA, ntpA, atpA; V/A-type H+/Na+-transporting ATPase subunit A [EC:7.1.2.2 7.2.2.1]																							0.000231337							4.41574e-06		0.00125928	0.000381156		0.00055158					0.000180128		5.09909e-05	0.112736	6.05558e-05	0.00268899		0.0041272
fraction	K02105	ATPeF1A, ATP5A1, ATP1; F-type H+-transporting ATPase subunit alpha		0.000414281		0.0283852	0.0122006	0.00892747	0.000468751		0.000188057			6.57329e-06	6.81204e-05		0.0454893	0.0483306		0.110702	0.000709552	0.0016955		0.227895	0.140826	0.548974	0.477158	0.424441	0.192413	0.593279	0.508666	0.603457	1.73966	0.0207495	0.161235	0.985889	0.0638634	0.215484	0.310617	0.651743	1.45779	0.809546	0.0800279	0.159169	0.0102545	0.00861614	0.0029383	0.00190641	0.00451767
fraction	K02109	ATPeV1A, ATP6A; V-type H+-transporting ATPase subunit A [EC:7.1.2.2]	0.209383	0.250267	0.0978549	0.0113349	0.0947206	0.0273208	0.311418	0.0473668	0.0645389	0.0521309	0.249517	0.0305976	0.509754	0.00279447	0.046787	0.00369196	0.0509784	0.0241659	0.397159	0.104409	0.117775	0.0361098	0.0516811	0.0512054	0.0230586	0.0199405	0.00902921	0.0727648	0.116749	0.00422396	0.0389184	0.259039	0.0901323	0.0117886	0.0379084	0.00855696	0.015133	0.0124348	0.0358086	0.0601505	0.0215089	0.0217573	0.029491	0.0901183	0.00370533	0.00534222	0.00498809
fraction	K02113	accB, bccP; acetyl-CoA carboxylase biotin carboxyl carrier protein	4.91909e-05	0.000875685	0.00180678	0.00123825		0.23004	0.00068035	0.00570793	0.000139471	0.00208656	0.000827769	0.00113635	0.00189719	0.00243754	0.000692714	0.00453747	0.000592766	0.00535286	0.00109386	0.000645076		0.000590044	6.07121e-05	0.000155265	0.000319898	0.000113978	0.000890384	0.000532994	0.000423173	0.000143976	0.000533789	0.00244956	0.00101786	1.87285e-05	0.000342603	0.00159824	0.0011448	0.000621223	0.000272693	0.000396216	0.000876002	0.00156804	0.00453076	0.0239228	0.00341265	0.00395686	0.00485055
fraction	K02117	caiC; carnitine-CoA ligase [EC:6.2.1.48]																					0.0212519	0.0218397	0.0168689	0.0124514	0.0192697	0.0116142	0.0154487	0.0117729	0.00484119	0.00275745	0.012424	0.00213261	0.038232	0.0102913	0.0151849	0.0115481	0.0784683	0.057245	0.0258864	0.0136232	0.0243816	0.0158062	0.000233929
fraction	K02132	CALM; calmodulin	0.00379572	0.00488155	0.0379887	0.0157372	0.0304952	0.0233415	0.014246	0.00320261	0.000652923	0.00644297	0.019693	0.0318325	0.00637424	0.000449988	0.0109222	0.000165676	0.00218827	0.000748576	0.012365	0.00471643	0.0179778	0.00889672	0.0115342	0.00564176	0.0154891	0.0182213	0.0116467	0.0115405	0.0113681	0.00382944	0.0145402	0.0453279	0.0269471	0.0186724	0.0445518	0.013666	0.020768	0.00818205	0.0214086	0.0047362	0.0256672	0.0129563	0.0259277	0.0546915	0.0333351	0.0456279	0.233875
fraction	K02145	cobP, cobU; adenosylcobinamide kinase / adenosylcobinamide-phosphate guanylyltransferase [EC:2.7.1.156 2.7.7.62]	1.31599e-05	0.000477926	0.00362237			0.00042579		3.00104e-05	4.00919e-07	3.24426e-06		1.32787e-05		1.17956e-05			6.07413e-05	1.21081e-05			0.0439963	0.152831	0.306312	0.0861602	0.0257531	0.11915	0.00130598	0.00559579	0.0285075	0.0006014	0.02985	0.00156402	0.0587622		0.514728		0.0763681	0.0609379	0.0767311	0.239904	0.00032932		0.0210748	0.0385918	0.0138456	0.0248176	0.0539206
fraction	K02160	comEA; competence protein ComEA	0.00138738	0.00111253	0.000443816		0.00561491	0.130626	0.010924	0.0221382	0.000419863	0.00125626	0.000292223	0.000287627	0.00312219	0.0113937	0.00621339	0.00146566	0.0121821	0.00946436	0.0118152	0.00688616	0.00318946	0.00394006	0.00187557	0.000599205	0.00011488	0.000253077	0.000157022	0.000710196	0.00238269	0.00151071	0.000709369	0.0032564	0.00653507	0.0012348	0.00712409	5.58886e-05	0.00273298	0.00173071	0.0012975	0.00354886	0.000385932	0.00176667	0.000909027	0.0374199		0.00141884	0.00964696
fraction	K02182	COX5B; cytochrome c oxidase subunit 5b	5.63846e-05	0.00012536	1.14049e-05		0.000269782		0.000268704	0.00532541	1.84523e-06	0.000109733	0.000608517	0.000606602		0.000371453	3.19959e-05	0.000614033	0.000271726	0.00275669	0.000192908	2.63219e-05				2.77605e-05	3.68886e-05		4.89909e-06			9.88014e-06					4.39497e-05	7.00058e-06	0.000155673	8.18983e-05			5.37376e-06	1.33668e-05
fraction	K02183	coxB, ctaC; cytochrome c oxidase subunit II [EC:7.1.1.9]	0.00245691	0.00838891	0.00118276		0.0121605		0.00123618	0.00390666	1.27609e-05	0.00183555	0.0176062	0.00974865			0.000135811	0.0322432		0.0019733	0.0807622	0.000949677	2.68641e-05	0.000244319	0.000248274	0.000219303		0.000199981	0.000180368	0.000183437	0.000193826	3.33757e-05	0.000208479	0.000114451	0.000828654		0.00758981	0.000109661	0.00101979	3.05514e-05	0.000228521	0.000256632	0.000202862	0.000173533	0.000927238	0.0535097	0.0124787	0.0668818	0.135256
fraction	K02231	cpaC, rcpA; pilus assembly protein CpaC																					0.00257955	0.00116897	0.0017573	0.00659506	0.0073835	0.0192032	0.00458267	0.0337334	0.0151362	0.00112024	0.0180935	0.00288839	0.00644259	0.00333884	0.00332006	0.000681547	0.00389242	0.0117222	0.0247193	0.0200084	0.000372099	0.000520672	0.00245803	0.000460192	0.000129563	0.000401885
fraction	K02237	cpcG; phycobilisome rod-core linker protein	0.00172992	0.00329514	0.0171009	0.0101164	0.00382421	0.000246114	0.00397062	0.00471203	0.00590526	0.00434599	0.00249998	0.00212405	0.00703758	0.00165263	0.00262942	0.000706031	0.00230767	0.00132585	0.00488563	0.102797																							0.00188131	0.00214111	0.00158619	0.000196543	1.617e-05
fraction	K02265	dnaB; replicative DNA helicase [EC:5.6.2.3]																								0.000235985	0.00024182	0.000618695	0.000111575					0.000263181	3.39502e-05	0.000776219		6.46429e-06				6.75498e-05	2.16311e-05	2.21466e-05
fraction	K02275	polA; DNA polymerase I [EC:2.7.7.7]	0.0164239	0.0847457	0.0301029	0.00130391	0.0130487	0.00119268	0.0105623	0.105066	0.00391185	0.0306042	0.0251827	0.0143144	0.00515201	0.0141052	0.03755	0.001198	0.00224767	0.0292864	0.0144516	0.0159558	0.00329018	0.00219264	0.000848222	0.0394555	0.0242975	0.00627232	0.00617523	0.037423	0.0206622	0.00291139	0.0400768	0.0136411	0.0186785	0.0157407	0.00534732	0.00140814	0.0426893	0.0411172	0.0266707	0.0292999	0.00453767	0.00332447	0.000159405	0.000353694	0.000870049		0.000191877
fraction	K02280	dnaE; DNA polymerase III subunit alpha [EC:2.7.7.7]	4.79359e-05	1.79662e-05					0.000149029	0.00113301	4.16908e-05			0.000429857			9.35254e-05			0.000177882	7.18248e-05	3.49674e-05		0.00623201	0.00595131	0.000530546			0.000731015	8.84478e-05	0.000824057		0.000206239			0.0109903		0.000533842	4.16795e-05					0.000112728
fraction	K02290	dnaX; DNA polymerase III subunit gamma/tau [EC:2.7.7.7]																						0.000274456	0.000112253	0.000281516			1.67014e-05	0.00111255	0.000827049	7.25408e-06	0.00165377	0.00141052	0.000349098		0.0277313	9.78549e-06	4.67042e-05	0.00105799	0.000182676				0.0029203	0.00338151	0.0301216	0.00220853	0.000314407
fraction	K02314	dinB; DNA polymerase IV [EC:2.7.7.7]	9.32029e-05	0.000286557	5.121e-05				2.33734e-05	6.20833e-06		1.57943e-06		2.89756e-06	7.89471e-06	5.66453e-06	1.77421e-05				1.33398e-05	7.7326e-05		6.19702e-05		6.17121e-05					0.000339722			0.000651353	0.00149949		1.27247e-05		0.000259365	0.000130548	1.17224e-05	0.000436538	1.79625e-06
fraction	K02335	tsf, TSFM; elongation factor Ts	0.00829964	0.0245356	0.00355918	0.000464347	0.0108475	0.000494847	0.00368766	0.0145925	0.00159755	0.00104285	0.0475989	0.0174685	0.00592439	0.00288692	0.000629699	0.00402185	1.47225e-05	0.00399538	0.0107937	0.00540144	0.00448222	0.0745028	0.0759636	0.00639381	0.014076	0.00603061	0.000203947	0.00339827	0.00300916	0.000316844	0.00225568	0.0116564	0.0060167	0.00182347	0.000535702	0.000164384	0.010309	0.00786126	0.00243311	0.00295543	0.00143633	0.00157789		0.00122126	0.000433271
fraction	K02337	tuf, TUFM; elongation factor Tu	0.0516353	0.0362553	0.028812	4.63043e-06		0.0193828	0.00676383	0.000479352	9.28017e-05	0.00145121	0.00824287	0.00112432	0.00594526	0.000290813	0.00973259	4.1099e-05	8.40987e-05	0.000966637	0.00275888	0.0079446		9.71134e-05	0.000368672	0.000293516	0.000595936	0.000467383	5.61688e-05	0.000642817	0.000717904	1.61204e-05	0.000133994	0.000158034	0.00115154	0.000502532	0.000914745	9.6369e-05	0.000294758		0.000712236	0.000607178	0.000117169	5.93369e-05
fraction	K02343	fabZ; 3-hydroxyacyl-[acyl-carrier-protein] dehydratase [EC:4.2.1.59]	0.000583728	0.00314434		0.00403863			0.000846277	0.000484148	0.000361378	0.00238511					0.00388232	0.000509448		0.000758676	0.00118038	0.00303598		0.0011727		0.000498236	1.02594e-05		0.000161106	0.000383736	0.000307258	3.19132e-05		2.40867e-05	1.41566e-05	0.000165132	0.00126919	1.01047e-05	0.00527268	0.0030781	0.000896138	0.00104604	0.00132665	0.000161569
fraction	K02346	TSTA3, fcl; GDP-L-fucose synthase [EC:1.1.1.271]	0.00176364	0.0040898	0.00232026	0.000656596	0.000162848		0.000984549	0.00119524	5.28803e-05	0.0168943	0.0445809	0.0127191		0.000585687	9.65854e-05	1.73829e-05		0.00408775	0.00101207	0.00157384	0.000134417	0.000309742		0.000281587		0.000814236	1.34276e-05	0.00198763	0.00243635	3.26955e-06	0.000126757				0.000489184	1.68916e-05	0.00016696		0.00107986	0.00147922	1.71261e-05	0.000119454
fraction	K02357	flgH; flagellar L-ring protein FlgH	0.0290241	0.0267647	0.0246412	0.0121172	0.028045	0.00780817	0.265109	0.0661082	0.150299	0.0429181	0.117481	0.054925	0.0622774	0.146949	0.0903253	0.0717162	0.00681015	0.0721852	0.232048	0.228103	0.0782904	0.291065	0.194047	0.0337595	0.0559083	0.0279342	0.0498386	0.0359513	0.0743942	0.015084	0.0237575	0.0327178	0.0677847	0.0620798	0.0330414	0.0403607	0.0262911	0.0136231	0.0305479	0.0503226	0.152571	0.0769105	0.0119301	0.0887476	0.1807	0.0203377	0.00581697
fraction	K02358	flgI; flagellar P-ring protein FlgI	0.170342	1.0135	0.507133	0.388669	0.647265	0.64573	2.04804	1.13808	0.320237	0.465706	2.1618	0.552195	0.782488	5.01579	1.16292	0.109219	0.38664	1.14829	1.51907	2.14792	1.64402	3.78605	3.64654	1.3833	1.21633	1.05799	0.991565	1.77472	3.04143	0.325539	0.84573	2.42393	2.16457	0.962675	1.4806	0.743831	1.22673	0.783801	1.78499	2.38071	2.05346	2.03852	0.0952111	1.50904	3.11585	0.684006	0.316127
fraction	K02372	fliC, hag; flagellin	0.0488591	0.0155539	0.00553931		0.00531296	0.00223412	0.0034345	0.00451874	0.00134867	0.0322315	0.00496127	0.00728731	0.00218287	0.0517813	0.00732273	0.000607085	0.000894977	0.0238871	0.0074669	0.00368465	0.000171368	0.00570265	0.0119764	0.00104241	0.000806272	0.000119565	0.00175942	0.00322085	0.00159371	9.36556e-05	8.94223e-05	0.00652354		0.00137253	0.000219295	1.92539e-05	0.00142212	0.00153746	0.00377512	0.00144125	0.00181175
fraction	K02377	fliD; flagellar hook-associated protein 2	0.000584783	0.000547593	0.000728555		3.0905e-05	0.000133993	0.000394409	0.000619809	0.000164114	0.00215034	0.00063413	0.000668907		0.000136946	0.000265302	0.000293426		0.00214533	0.000137953	0.00587512	0.00160397	0.000491181	0.000394109	0.0028401	0.000547106	0.00255706	0.00405848	0.02119	0.00172039	7.45505e-05	0.0179213	0.0401165	0.00105776	0.000351164	0.000116311	0.000878485	0.00292725	0.0017988	0.0169543	0.0044352	0.000825256	0.00287954	3.33651e-05	7.36959e-05	0.000209404	0.000212497	0.000411339
fraction	K02393	fliI; flagellum-specific ATP synthase [EC:7.4.2.8]	0.0173701	0.0132032	0.0268817	0.000531616	0.00997799	0.000430921	0.0357957	0.0586211	0.0016799	0.0498082	0.010607	0.0153324	0.00154543	0.0796943	0.0152901	0.000963295	0.00242171	0.0356386	0.046032	0.0242367		0.00212083	0.000772549					0.000228747		1.21748e-05		0.000505954	0.000803417		3.02797e-06				0.000198286	0.000168295
fraction	K02394	fliY, tcyA; L-cystine transport system substrate-binding protein	0.00796757	0.00465468	0.00233848	0.000579145	0.00487915	0.000980397	0.00493189	0.0463043	8.25931e-05	0.0349132	0.000671192	0.0189791	0.000728368	0.0361113	0.0051854	0.00973753	0.00429839	0.0555429	0.00939203	0.00858408		0.000227695	0.000170128					0.000180337	0.00105851				0.00153478		0.000275565		0.000339532	0.00113645	0.000352093	0.00227015	5.19234e-05
fraction	K02406	gatA, QRSL1; aspartyl-tRNA(Asn)/glutamyl-tRNA(Gln) amidotransferase subunit A [EC:6.3.5.6 6.3.5.7]	0.0586584	0.0807838	0.124315	0.0797694	0.201496	0.0995992	0.293729	0.0775098	0.0382739	0.146718	0.850625	0.0951197	0.348778	0.119195	0.146379	0.0315773	0.0813727	0.177883	0.198524	0.903229	0.581314	0.287198	0.30061	0.480382	0.406498	0.47872	0.299258	1.1398	1.13395	1.06297	0.282144	1.65723	1.23437	0.369366	0.839908	0.134755	0.406316	0.388854	0.818174	1.39383	0.530482	0.369873	0.067	0.263754	0.111846	0.138601	0.0764201
fraction	K02407	gatB, PET112; aspartyl-tRNA(Asn)/glutamyl-tRNA(Gln) amidotransferase subunit B [EC:6.3.5.6 6.3.5.7]	0.000130735	5.79645e-05					0.000519824	0.000287374				0.000422097		0.000505893				0.000458053	6.13426e-06	1.58986e-05	0.000770852	0.00309611	0.00279442	0.00669837	0.00317247	0.00159431	0.00276437	0.00799394	0.00854877		0.00125902	0.00215617	0.00466027	0.0137822	0.00285025	0.00171591	0.00624491	0.00606197	0.00290492	0.00837821	0.00175253	0.00114154	0.000203586			0.000829634
fraction	K02412	gspD; general secretion pathway protein D	0.468775	0.200673	0.0320761				0.00904351	0.000126544	0.000240417										0.0123662	0.0166953																								0.000203679	4.56032e-05	0.000843614	0.00321497
fraction	K02424	gspE; general secretion pathway protein E [EC:7.4.2.8]	0.00125056	0.00120846	0.00193515	0.000344492	0.000764435	0.0109941	0.000442733	0.00837054	7.04422e-06	0.00484435	0.00290002	0.000385915	0.000883061	0.00492759	0.000122072	0.000214175	0.00555947	0.00646232	0.000118777	0.000359832	2.42573e-05	4.16197e-05	1.65966e-05	0.00047574	0.000312773	0.000227993	0.00202006			7.66459e-05	6.01885e-05	0.0135618		6.22494e-05		2.14593e-05	0.00147675	0.000715612	3.41669e-05		6.3626e-06	0.0127553
fraction	K02428	gspL; general secretion pathway protein L	0.0054843	0.00924789	0.0122566		0.0128206	0.0191519	0.0155324	0.00229782	0.00132948	0.0130705	0.00873232	0.0340163	0.190531	0.0165006	0.0021853	0.00160079	0.0106906	0.0128784	0.033224	0.0379169		0.00328299	0.00364375	0.00608772		0.00550774			0.00296622	0.00142924	0.000890917	0.00154047	0.00266332	0.00261632		0.00198538	0.00170099	0.00251872	0.000854802	0.00106111			0.00149466	0.0148829	0.00210251
fraction	K02433	gyrA; DNA gyrase subunit A [EC:5.6.2.2]	0.0156395	0.00865567	0.0584456	0.0169768	0.0124491	0.0650926	0.0139379	0.0371471	0.00816553	0.0122223	0.0149471	0.00836049	0.0119434	0.0147764	0.0210866	0.000890157	0.000842399	0.0200905	0.00923408	0.010976	0.00959665	0.0131101	0.0219174	0.0593819	0.0689187	0.0393032	0.0102417	0.0178036	0.0160513	0.000985788	0.00505265	0.00527187	0.0209452	0.00780558	0.0413796	0.0136605	0.052924	0.0120585	0.00705057	0.0169166	0.012302	0.00936505	0.000305169	0.000422399	0.000925206	9.13418e-06	0.00251471
fraction	K02434	gyrB; DNA gyrase subunit B [EC:5.6.2.2]	0.000376675	0.000223969	0.000170694	0.00403371	0.00184413	0.000122446	0.000483484	0.00682384	3.17804e-05	0.00256236	0.00165993	0.000509914	0.0070887	0.00787315	0.000242003	4.24138e-05	0.00119548	0.00267731	0.00147535	0.00115598	0.297738	0.0399483	0.0328082	0.0033177	0.000684446	0.00233558	0.0069691	8.55493e-05	0.0125929	0.0326926	0.00183855	0.0208628	0.015228	4.89496e-05	0.00035744	0.0102547	0.00561428	0.00369909	0.105356	0.0128079	0.00129468	0.00848248	0.00133174	0.00385663	0.00140627	0.0004077
fraction	K02453	wecC; UDP-N-acetyl-D-mannosaminuronic acid dehydrogenase [EC:1.1.1.336]	0.00385111	0.00623745	0.00993179	0.029623	0.0474683	0.040913	0.0148358	0.0417177	0.0190858	0.0494528	0.0341889	0.0909589	0.0808289	0.0462167	0.0116885	0.00319419	0.00909169	0.0601941	0.0232137	0.0152162	0.00319919	0.0183695	0.0352707	0.012157	0.00543491	0.0145614	0.00145025	0.0051029	0.0146655	0.00219867	0.000762916	0.0284061	0.00848046	0.0148801	0.00730395	0.00773174	0.0157874	0.0128483	0.00665852	0.00774515	0.00232698	0.00813472	2.49732e-05	0.00294311	0.000581929	0.000670938	0.00226394
fraction	K02454	wbpP; UDP-N-acetylglucosamine/UDP-N-acetylgalactosamine 4-epimerase [EC:5.1.3.7 5.1.3.-]	0.00765109	0.0186943	0.00524092		0.00112673	0.000236946	0.0207386	0.00102048	0.950625	0.00480585	0.00111497	0.00724852		0.000597229	0.00392386	0.000259233	0.00234733	0.000755335	0.0231438	0.0413694	0.00426838	0.030111	0.0554526	0.00264924	0.00385888	0.00202787	0.0020619	0.00119291	0.00282782	0.0035174	0.00134304	0.00138442	0.0123659	0.0073684	0.00578356	0.000169323	0.00284807	0.000506166	0.00238933	0.00226098	0.00256236	0.514108		0.000715062		0.000189887
fraction	K02461	K02477; two-component system, LytTR family, response regulator	0.000564701	0.00388846	0.002295	0.000611936	0.000830033	0.000662958	0.00187341	0.00046407	0.000219162	4.81981e-05		0.00106465		0.000272026	1.87618e-05	0.00023743		0.00228366	0.00157245	0.00285309	0.000208219		4.48369e-05				4.80799e-05	0.000160222	0.000162473	0.000188085				3.41663e-05	0.000181942				0.000116967	0.000175636
fraction	K02469	K02483; two-component system, OmpR family, response regulator	0.0954657	0.102369	0.0934019	0.0053312	0.019159	0.0293488	0.0802938	0.0322274	0.00364612	0.0178147	0.0391135	0.0589079	0.0317102	0.0130351	0.0850439	0.00463188	0.00693741	0.0374095	0.0654229	0.0422362	0.0189778	0.0185219	0.015594	0.03228	0.0416601	0.0365439	0.0371484	0.0267009	0.0503766	0.103195	0.015174	0.0680153	0.0230626	0.0164565	0.0678941	0.00196304	0.0292679	0.0164418	0.018779	0.0338988	0.00973342	0.00908771	3.47159e-05	0.00558677	0.00616248	0.000322883	0.000986998
fraction	K02470	K02484; two-component system, OmpR family, sensor kinase [EC:2.7.13.3]	0.0127749	0.0468377	0.0948571	0.00895595	0.0137078	0.00602586	0.0287383	0.00715494	0.000850392	0.0112071	0.00982281	0.0131005	0.0175422	0.0103517	0.00434138	0.00306012	0.00726476	0.00708011	0.00940424	0.0152675	0.00354765	0.0216227	0.0187922	0.0789655	0.125102	0.0502309	0.00592308	0.107976	0.114376	0.0104492	0.0440403	0.0579491	0.0468259	0.666535	0.120145	0.0144763	0.0235894	0.0116081	0.0718972	0.111141	0.0255998	0.0494018	0.00502752	0.00828207	0.00291455	0.00356233	0.000103264
fraction	K02472	hemA; glutamyl-tRNA reductase [EC:1.2.1.70]		0.000141612	0.000241482		0.000284257		0.00137541	6.83104e-05	4.69968e-06		2.87948e-05			0.000831251		3.70885e-05		0.00288624	5.90762e-05	0.000211591	0.000230595	0.000288421	0.00243924	0.00206283	0.00305886	0.00127554	0.00517622	0.00506924	0.0123631	0.00114465	0.000750059	3.46836e-05	0.00124327	2.90642e-05	0.00287528	0.00107383	0.00228396	5.22071e-05	0.000707913	0.0037824	0.000984639	0.00260884
fraction	K02473	hemX; uroporphyrin-III C-methyltransferase [EC:2.1.1.107]	0.156526	0.101369	0.0174074	0.00406192	0.00171577	0.000610146	0.0112749	0.0678525	0.000738959	0.492884	0.7182	0.0162381	0.00771308	0.0222824	0.00169008	0.119119	0.00416804	0.025445	0.014382	0.0279102		0.000151704	0.000274059		2.60527e-05		0.000110947		1.2406e-05	1.6843e-05		0.000184033				2.23205e-06	9.21167e-06	5.95706e-05	2.24951e-05	2.66695e-05	1.03155e-06	9.28451e-05	0.00456094	0.0547875	0.263394	0.063604	0.123063
fraction	K02477	hemY; HemY protein	0.0109594	0.023288	0.0224362				0.0234863	0.00595253	0.00144517	0.0067539		0.0888568		0.00672439	0.0158726	7.58549e-05		0.000303406	0.011867	0.0375422		0.00499914					0.0115854	0.00290051	0.00061096		0.00338784					0.00602463	0.00318299	0.00495706	0.00237301	0.00202142
fraction	K02483	hisH; imidazole glycerol-phosphate synthase subunit HisH [EC:4.3.2.10]	0.011565	0.0241147	0.024141	0.000526639	0.00226949	0.000820631	0.00619641	0.0211871	0.000654267	0.000782957	0.0106576	0.0285483	0.0136754	0.0228801	0.00593319	0.0100901	0.00933729	0.0231375	0.015555	0.0252468	0.000979356	0.0258616	0.0326306	0.00686131	0.010596	0.00458744	0.0139351	0.00549576	0.00917501	0.0101232	0.00314029	0.0145893	0.0123042	0.0246927	0.00849494	0.00232484	0.00966304	0.00607586	0.00774344	0.00379686	0.014441	0.0172335	2.17338e-05	0.00172385	0.000941473	9.84953e-05
fraction	K02484	hisZ; ATP phosphoribosyltransferase regulatory subunit	0.00406314	0.00514386	0.0120254		0.00121151	0.000163307	0.000989681	0.00571229	9.32647e-05	7.1433e-05	9.03681e-05	0.000193392		0.000678549	0.000874406	0.000298376	0.000858687	0.000595	0.000961125	0.000536514	5.55576e-05			1.39658e-05				9.60639e-06		7.87606e-06	0.000180883					3.25658e-05	1.23383e-05	1.18831e-05		1.78516e-05		0.000129493
fraction	K02487	hofQ; protein transport protein HofQ	0.000299533	0.0016977	0.00148648	0.00486528	0.000364935	0.00183383	0.000394146	0.00588813	2.68998e-06	0.00760289	0.000743376	0.0349393	0.000219853	0.000698714	0.000157273	0.00389958	0.00073717	0.00132578	0.000109276	0.000485766	8.93703e-06		1.96614e-06	8.67546e-05	0.000439961	8.5437e-05			0.00165256			4.66952e-05	0.000725596	3.24658e-06							0.000388346	0.000348912	2.481e-05	0.000692701	9.03592e-05
fraction	K02492	infA; translation initiation factor IF-1	0.00372167	0.00504481	0.00115984				3.49693e-05		1.26064e-05	0.000233342		7.13052e-05							0.00103199	0.000902858		0.000829514	0.000151136	0.00172506	3.16205e-05	0.000151181		0.00136688	0.00512264		0.000113756	0.000615401	0.00067901		0.00183215		0.00123711	0.00149334	1.18479e-05	0.00221298			0.00255319	0.00242044	0.000126282	0.00179935	0.000227626
fraction	K02496	infB, MTIF2; translation initiation factor IF-2	0.0247277	0.0478675	0.0112679	0.0494332	0.00448223	0.0579046	0.041332	0.0529595	0.00485171	0.0484554	0.00475721	0.010819	0.00289592	0.013363	0.0191412	0.00407194	0.0235052	0.0229528	0.0993839	0.0521568	0.00203359	0.00196862	0.00186461	0.000341003	0.00310037	0.00299555	0.00248014	0.00637908	0.0108624	0.000596901	0.000938697	0.00624303	0.0276315	0.0202416	0.00545968	0.00123779	0.00127371	0.00172649	0.0047826	0.00745393	0.00258848	0.00472914	0.000559042	0.0222277	0.0266065		0.0037418
fraction	K02498	infC, MTIF3; translation initiation factor IF-3	0.149117	0.0986091	0.0375901	0.0125964	0.00370527	0.0367869	0.0139322	0.0422474	0.00147187	0.0496496	0.00524693	0.0117136	0.114129	0.0111141	0.00161313	0.00392873	0.0114329	0.0108536	0.0218753	0.0190766		0.000320768	0.000851268					0.00368047	0.00174976				0.000457234		0.00185736		0.00363806	0.000494761	0.00199025	0.00314064	0.0099391	0.00279205
fraction	K02501	lacI, galR; LacI family transcriptional regulator	0.00992522	0.00967776					0.00220837		9.06441e-05										0.00114942	0.00614095		2.54785e-05															0.000165797		0.000155747		8.5643e-05		0.00017743	0.000106876
fraction	K02502	lasT; tRNA/rRNA methyltransferase [EC:2.1.1.-]	0.0010401	0.000896294	0.000298497	0.000200135	0.000473106	1.53458e-05	0.00016113	0.00746504	2.14301e-05	0.00124562		0.00103642	0.000554445	6.79235e-05	0.000432519			0.000175904	0.000185186	0.000101967	0.00511387	0.00625724	0.00693771	0.00639408	0.0139309	0.00920333	0.00941719	9.52606e-05	0.00642377	0.0834715	0.00151586		4.44144e-05		0.000182013	0.00713036	0.00374548	0.00725202	0.00045593	0.00137732	1.89391e-05	0.000212226
fraction	K02507	lpxD; UDP-3-O-[3-hydroxymyristoyl] glucosamine N-acyltransferase [EC:2.3.1.191]	0.00767371	0.00550456	0.0208625	0.149625	0.0244284	0.0359368	0.0510984	0.174329	0.00243256	0.197541	0.0415204	0.0245644	0.0176194	0.0768135	0.0225192	0.0261537	0.0392085	0.161113	0.0631864	0.0705017	0.0648637	0.0462125	0.0690907	0.0129185	0.00494662	0.0156259	0.00393479	0.0211015	0.0781781	0.0157063	0.0124153	0.0343797	0.036952	0.0226622	0.0148296	0.00334154	0.0159864	0.0123242	0.0184125	0.0227215	0.013605	0.0121269	0.00128153	0.00995523	0.0052151	0.00218892	0.000600814
fraction	K02518	rraA, menG; regulator of ribonuclease activity A	0.0188688	0.118539	0.0236588	0.00945124	0.00541621	0.0129096	0.0358703	0.000100653	0.00570409	0.00966159	0.00208572	0.00183388	0.000506592	0.00242499	0.0569471	0.0013522	0.00620722	0.000677304	0.0349434	0.0618511		0.000258424	0.000480728	0.00258413	0.00130748	0.00019497	0.00177225	0.0014233	0.00873341		0.00580884	0.00061253	0.00221551	0.00172146	0.1154	0.000564207	0.00286725	0.00609086	0.00495761	0.00169081	0.00057211	0.0244985	0.000194085	0.00687787
fraction	K02519	mpl; UDP-N-acetylmuramate: L-alanyl-gamma-D-glutamyl-meso-diaminopimelate ligase [EC:6.3.2.45]	0.0208854	0.06356	0.0808499	0.0110443	0.0159346	0.0814934	0.0657815	0.0421124	0.0050293	0.0863394	0.0766215	0.0460049	0.0399047	0.0474027	0.0497957	0.00865525	0.00846761	0.0425473	0.0457411	0.0186791	0.0647437	0.0651976	0.03769	0.117398	0.0213658	0.069854	0.0205803	0.117109	0.21516	0.0326515	0.265023	0.325815	0.146952	0.135633	0.0910196	0.0135691	0.0808109	0.0898236	0.0713393	0.157022	0.0989177	0.0740042	0.00437976	0.0107911	0.0102	0.00264829	0.00262744
fraction	K02520	paaA; ring-1,2-phenylacetyl-CoA epoxidase subunit PaaA [EC:1.14.13.149]	0.0808665	0.0987171	0.058515	0.00144731	0.0753901	0.0159955	0.0487492	0.0144698	0.0445045	0.0282394	0.397129	0.182643	0.0258656	0.0029709	0.0355537	0.000366262	0.00104654	0.013693	0.0543893	0.0783676	0.0029801	0.00393483	0.00811661	0.0081884	0.00869194	0.00838622	0.0358042	0.00565508	0.0123808	0.00234421	0.00442971	0.006516	0.0241293	0.00613926	0.00414717	0.00981662	0.00173405	0.00196027	0.00371145	0.00993621	0.00512394	0.0598465	0.000618735
fraction	K02529	paaJ; 3-oxo-5,6-didehydrosuberyl-CoA/3-oxoadipyl-CoA thiolase [EC:2.3.1.223 2.3.1.174]	0.00194965	0.0116039	0.0143611	4.97243e-05	0.00100754	0.00126141	0.00419491	0.00105688	0.00027166	0.00427365	0.000258842	0.000836084	0.00284442	0.000920271	0.00119568			0.000668152	0.0040871	0.00740744		6.46663e-05	7.76257e-05				8.28328e-05		0.00680451	0.000135472	0.00272328	2.69784e-05	0.000282429	0.000359591	0.00449753	2.94849e-05	0.00118479	0.000562674	0.000541445	0.00620784		0.000162763	0.000110504	0.000309854		0.000594737
fraction	K02533	parC; topoisomerase IV subunit A [EC:5.6.2.2]	0.00338831	0.0208797	0.00234197		0.000266524		0.0726877	0.000768773	0.00265116	0.00140169		0.00585966		0.0011111	0.0058316			0.0035214	0.0562224	0.0620597			0.000381309				0.00565645		0.0011273	1.60216e-05	0.000280362			0.00035027	0.000659377	0.00462178	0.00014638				0.00234611	0.000764175		0.00260859	0.000407931	2.56715e-05
fraction	K02536	parE; topoisomerase IV subunit B [EC:5.6.2.2]	0.000799544	0.0015019		0.000210411	5.21824e-05						0.000346759	0.00033057	0.000774652	0.00021934		2.50087e-05		1.71404e-05	5.17273e-05		0.00771161	0.00726158	0.0130757	0.00250621	0.00272341	0.00158368	0.00027385	0.00385942	0.00516219	0.00235048	0.00196978	0.000538029	0.000566798	0.000677486	0.00299887	0.000190036	0.00408187	0.0034036	0.0042015	0.0094741	0.000906757	0.000868985	7.97686e-06	2.16399e-05	0.00069877	0.00306712
fraction	K02553	petH; ferredoxin--NADP+ reductase [EC:1.18.1.2]	0.0373879	0.0403009	0.0306682	0.00147801	0.00177658	0.00270907	0.0249444	0.0503647	0.0122983	0.0738012	0.0450646	0.0373463	0.108146	0.197765	0.00721499	0.00229899	0.0392368	0.185841	0.0686923	0.0782092	7.61704e-05	0.00668266	0.00750128	0.00939604	0.00417077	0.00824803	0.00240056	0.0143108	0.0237557	0.00249444	0.000433384	0.00150772	0.00836328	0.0399257	0.0102323	0.00704901	0.000460929	0.00028113	0.0141062	0.0190378	0.000403031	0.00546959	6.63938e-05	0.0135075	0.00067023	0.00906368	0.000174022
fraction	K02558	pilA; type IV pilus assembly protein PilA	0.00144944	0.00710329	0.000152685	0.000322372	0.00212973	0.000486825	0.000971576	0.00278324	0.000179146	0.000602168	0.010179	0.00130664	0.000239557	0.00020094	0.000535559	3.25256e-05	0.000311922	0.000963598	0.0035222	0.00343083		0.000209675	0.000262709	0.000149813			3.91242e-05	0.000532543	0.00043132	1.44216e-05	0.000375754	0.000338197				1.25427e-05	7.04271e-05	7.99726e-05	0.00036838	0.000453402	9.81661e-05	0.00184699		0.000561616
fraction	K02609	pilB; type IV pilus assembly protein PilB	0.0211028	0.0481986	0.0311694		5.08128e-05	0.000206244	0.00401941	0.00126946	0.000152683	0.000366372	0.00146255	0.00295326	0.00136699	0.000124368	0.0082655	2.61092e-05		0.000417053	0.00248769	0.00563262	0.00112966	0.00387384	0.0057179	0.010401	0.0316491	0.0170425	0.00102011	0.0121761	0.00818693	0.00075184	0.00461334	0.00531881	0.0142541	0.00442621	0.00896324	0.000148666	0.00766332	0.0112418	0.0162806	0.0241992	0.00215469	0.00225821
fraction	K02615	pilE; type IV pilus assembly protein PilE				8.8972e-05	0.0027389	0.000118503	0.00184832		1.39537e-06	0.00012923	0.00204187	0.000396845	0.00330843		3.61274e-06	1.32562e-05	0.00561889	0.000228337	0.000150561	5.69219e-05		0.0044919	0.00778506
fraction	K02621	pilF; type IV pilus assembly protein PilF	0.0078515	0.0113215	0.00640357	0.00202438	0.000549764	0.000460601	0.00448727	0.00582767	0.065035	0.00263494	0.0169958	0.00500272	0.0142852	0.00357951	0.00208324	0.00225563		0.0055264	0.00224516	0.00276613	0.0254972	0.000591051	0.00024001	0.0181817	0.0209749	0.0144904	0.00931413	0.00955529	0.0154861	0.00264893	0.00437903	0.00631755	0.0276031	0.00301902	0.0361998	0.00715757	0.0438964	0.000436642	0.0135526	0.0139534	0.000281697			0.000240768
fraction	K02622	pilJ; twitching motility protein PilJ	0.0147231	0.0110865	0.00482939	0.0480708	0.0136769	0.0048889	0.00272309	0.00264629	0.00247003	0.00599653	0.0546768	0.0019718	0.00434141	0.00683107	8.92122e-05	0.00389486	0.0561739	0.000876394	0.000252043	0.000279731	0.000942805	3.95574e-05	0.000832179	0.00222507	0.0015294	0.00383968	3.25088e-05	0.00132229	0.00284622	0.000126248	0.00126118	0.00138404	0.00351445	0.0010839	0.00446679	0.000285051	0.000902617	0.000974216	0.00108797	0.00326641	0.00179163	0.00325812
fraction	K02641	pilM; type IV pilus assembly protein PilM																						0.0136733	6.99678e-05	0.0034842		0.000308476	0.00166678		0.00703253	0.00172665	0.000356966	0.000189703	0.00055759	0.00791197	0.0587502	4.47932e-05	0.00349333	0.000197449	0.00406605	0.00271584	6.84014e-05	0.00268014	0.0029878	0.00114455	0.00323098	0.00148761	0.00340623
fraction	K02650	pilN; type IV pilus assembly protein PilN	0.226712	0.0911346	0.111577	0.00148136	0.00835504	0.00879131	0.0681629	0.897183	0.00707716	0.112485	0.0150314	0.0423182	0.0125862	0.388626	0.0863271	0.0445592	0.0107206	0.476189	0.113757	0.0918499	0.0752771	0.211501	0.204839	0.148178	0.160391	0.273411	0.16089	0.450316	0.407442	0.0116325	0.286257	0.0252016	0.0478927	0.0139344	0.134812	0.173343	0.018725	0.0109665	0.368258	0.108397	0.0420481	0.139994	0.00729943	0.0952066	0.0907291	0.00311965	0.00193261
fraction	K02652	pilP; type IV pilus assembly protein PilP	0.00139896	0.00152549	0.000511826		7.50766e-05		0.00446898	0.00078532	0.334933	0.00113481		7.21968e-05		0.00242351	0.000697857		0.0204118	0.00864122	0.00547522	0.00817412	0.00211701	0.0546191	0.093384	0.00152247	0.00744541	0.00255618	0.00205713	0.0004682	0.000962076	0.00415316	0.000218357		0.0102148	0.000846565	6.14416e-05	0.000171544	0.0014523	0.000589762	5.7619e-05	0.000812144	0.00231385	0.000168608		0.000536426		0.000215117
fraction	K02655	pilQ; type IV pilus assembly protein PilQ	0.0170161	0.00461934	0.00792974	0.00900465	0.0396953	0.0138036	0.00395746	0.0666457	0.000547255	0.0459813	0.00479445	0.0259826	0.0161261	0.240532	0.00349909	0.0352673	0.00022034	0.0312402	0.00916661	0.00878193	0.00335811	0.0330309	0.0386792	0.00184839	5.7254e-05	3.44823e-05	0.00209541	0.0249475	0.0299096	0.00387248	0.0021654	0.00563193	0.0213321	0.000362479	0.0133154	0.000565972	0.00128643	0.000511255	0.0146265	0.0164393	0.00255756	0.000197865	0.000336363	0.00163886	0.00184422	0.000225072	0.00026553
fraction	K02656	pilR, pehR; two-component system, NtrC family, response regulator PilR	0.00384417	0.00933268	0.00211633	0.000702421	0.0151634		0.000159331	0.000925989	0.000135502	0.00144725	0.000153734			0.00132908	6.61684e-05		0.000115549	0.00181406	0.00047654	0.00291095	0.000228231		0.000553307	1.4314e-05			6.44602e-05										1.62378e-05
fraction	K02660	pilU; twitching motility protein PilU	0.0365907	0.00248915	0.00184033	0.0505455	0.000283615	0.103566	0.0088973	0.081799	0.0327504	0.0128923	0.0127987	0.0161766	0.0100759	0.003057	0.0120486	0.00606975	0.00817565	0.0183766	0.00874991	0.00188034	0.0177663	0.0349707	0.0287125	0.00634059	0.00584587	0.00905779	0.0037254	0.00324651	0.0368835	0.00901273	0.00671473	0.00353291	0.0208168	0.0764925	0.00217332	0.00195997	0.00552817	0.00475325	0.00409812	0.003242	0.00109921	0.00347484	0.000300101	0.0340654		0.00596854	0.00126206
fraction	K02662	pilV; type IV pilus assembly protein PilV	0.00275249	0.0504854	0.0168645	0.0136039	0.0251538	0.0149917	0.0038162	0.0103838	0.000237031	0.0218326	0.00383141	0.00687978	0.0319004	0.00245378	0.00799029	0.000453342		0.00886032	0.0150123	0.0266534	0.0220142	0.0273643	0.0387613	0.00047757		0.0021378	0.000143606	0.000278209	0.00369452	1.82858e-05	0.00582196	0.00352673	0.00301606	0.0058425	0.00033574	0.000198025	0.00440543	0.00245301	0.00133152	0.000338954	0.000675677	1.69378e-05
fraction	K02663	pilY1; type IV pilus assembly protein PilY1	0.00426119	0.00268273	0.00973766	0.00466983	0.0477372	0.0470262	0.00753323	0.0430067	0.000957619	0.0150515	0.00912591	0.0285081	0.0116213	0.0295316	0.00556163	0.00257074	0.0143481	0.0130093	0.00664351	0.0171172	0.000787722	0.00720571	0.0143099	0.00742422	0.00343452	0.0068825	8.52129e-05	0.00220386	0.0145007	0.000874742	0.00152404	0.00409095	0.00689797	0.0302896	0.00183485	0.000418278	0.00453281	0.00229127	0.000353409	0.006852	0.00540507	0.00309065
fraction	K02665	prmA; ribosomal protein L11 methyltransferase [EC:2.1.1.-]	0.00302385	0.0056181	0.028498	0.00118624		0.000348889	0.000912939	0.0182637	0.000461049	0.00259933	0.000346633	0.000296255	5.39649e-05	0.011706	0.00126152		0.000266609	0.0180956	0.000802281	0.00270663		0.000836032	0.00133174		0.000485572		5.64871e-05		0.000523956	9.17744e-05	0.000168807	0.00139882	0.00109969	0.000987251	0.00077872	2.58692e-05	0.000701047	0.000770629	0.0011721	0.000694118	7.94014e-05	0.000165773
fraction	K02666	psbD; photosystem II P680 reaction center D2 protein [EC:1.10.3.9]	0.00767371	0.00550456	0.0208625	0.149625	0.0244284	0.0359368	0.0510984	0.198767	0.00245159	0.200604	0.0415204	0.0256827	0.0176194	0.0768135	0.0225192	0.0303	0.0392085	0.164075	0.0631864	0.0705017	0.0649201	0.0462835	0.0691657	0.017908	0.00496184	0.0168085	0.0150918	0.022468	0.0836376	0.0691733	0.0147236	0.0348099	0.037249	0.0231355	0.0155332	0.00884795	0.0172295	0.0139336	0.0201542	0.0248389	0.020982	0.0202947	0.009429	0.011664	0.0120644	0.0030509	0.000600814
fraction	K02667	psbV; photosystem II cytochrome c550	1.21028e-05	1.1724e-05	2.25033e-05	8.35288e-05	1.05344e-05		1.25621e-05	0.000144691	4.07883e-07	0.0109945		0.000114702		0.000271105			7.79812e-05		8.99049e-05	2.19317e-05	0.000826887	0.0010466	0.00686564																					3.3349e-05
fraction	K02670	PSMA2; 20S proteasome subunit alpha 2 [EC:3.4.25.1]	0.00265009	0.00874608	0.00342125	0.000999513	0.000960719	0.00395708	0.00470356	0.00600346	0.000655325	0.0136111	0.0120308	0.0121789	0.00973	0.00262303	0.00529017	0.00213905	0.00336269	0.00288227	0.0108395	0.0117914	0.075922	0.0783107	0.0845482	0.00494542	0.00575404	0.00405711	0.00707954	0.013599	0.0180258	1.92828e-05	0.00727336	0.0328294	0.0564822	0.0147674	0.00756221	0.000176672	0.00424209	0.00183114	0.0127747	0.0185527	0.00184765	0.000937555	3.10015e-05	0.00159937	0.00167744	0.000262252	0.00014799
fraction	K02671	PSMA6; 20S proteasome subunit alpha 1 [EC:3.4.25.1]	0.00418937	0.00128373	0.00116309	0.000260631	0.00109557	0.00374598	0.00153894	0.00497395	0.000157187	0.000876716	0.0109948	0.038826	2.62756e-05	0.000587033	0.000496763	0.00548232	7.20582e-05	0.00173669	0.00154426	0.00154125	0.000605511	0.00278166	0.00081136		0.000113928			0.000614531	9.41205e-05		0.000117319	0.000202807	0.00118855	0.000523828			0.000130597	0.000839976	0.00092279	0.0010505	0.00198322	0.000503989		0.000260823	0.00264531
fraction	K02674	PSMA7; 20S proteasome subunit alpha 4 [EC:3.4.25.1]	0.0104925	0.00269947	0.00719392	0.000924847	0.00411372	0.00126444	0.0115969	0.0218208	0.456797	0.0207014	0.00893158	0.00754496	0.0141917	0.0410121	0.00107742	0.0127004	0.019105	0.0263535	0.000985942	0.000968901	0.00189751	0.00470604	0.00382125	0.00274431	0.00324104	0.00320218	4.08749e-05	0.00505702	0.00700696	0.000427245	0.000665335	0.000399552	0.00158931	0.00111739	0.00333355	0.00142723	0.0024828	0.00258122	0.00365407	0.00618117	0.000760424	9.76861e-05	0.0035356	0.000413357	0.00082983	9.90013e-05
fraction	K02687	prfA, MTRF1, MRF1; peptide chain release factor 1	0.000425019	0.000305258	5.60505e-05	0.000955862	7.95402e-06		0.000300643		4.91495e-06		3.74639e-05					3.52293e-05			5.50143e-05	1.77643e-05		5.16767e-05	1.8853e-05											0.000103644	0.000443384		8.11315e-05	1.81668e-05	3.86298e-05				0.00510754		0.0413051	0.000905342
fraction	K02706	prfB; peptide chain release factor 2																							4.05201e-05	0.00104917	0.000691507		0.000127629	0.000719872	2.09032e-05		0.000578873		0.00165094	0.00289092	0.00348614	0.000225334		0.000199779	0.00028895	0.000189492		2.4863e-05	0.00141214	0.0667559	0.0109432	0.00218986	0.00759436
fraction	K02720	prfC; peptide chain release factor 3																							0.000278159	0.00030036	0.000376972				0.00044051	2.55353e-06		0.000441606	0.000781966	0.000716318	0.00071384		0.000146272			5.51796e-05		0.00023181	0.0022399	0.00600163	0.0156175	0.0163642	0.00679662
fraction	K02726	rimM; 16S rRNA processing protein RimM																								8.16426e-05			0.000900997			0.00438015			0.00218554			0.00857665						0.0020224	0.0247649	0.0270372	0.0391366	0.00933504	0.0217583
fraction	K02730	RP-L1, MRPL1, rplA; large subunit ribosomal protein L1																					0.0905217	0.11038	0.0641084	0.0142727	0.0885541	0.0247818	0.0331784	0.0390583	0.0144421	0.182173	0.0622584	0.0335819	0.0961216	0.0653433		0.082782	0.00520871	0.0225292	0.0170873	0.00810049	0.0278084		0.00600079	0.00265586	0.00186448	0.000527854	0.000757076
fraction	K02731	RP-L10, MRPL10, rplJ; large subunit ribosomal protein L10		2.47119e-05	0.000249053		4.04528e-05	0.00140223	7.93802e-06	0.00158036	1.37411e-06	0.000328254	0.00204947	0.00154302	3.08026e-05	4.3352e-06	7.92346e-06	2.50005e-06		0.000835436	0.000215762	0.000955732		6.68679e-05		0.000265191	0.00362695	0.00574138	0.00704358	0.00202685		0.0498101	0.00903169	0.00551879	0.000491221	0.00438652	1.41977e-06	0.011508		0.00296323		9.32444e-05	0.00987983	0.00406926	0.120274	0.0756249	0.0355481	0.0185223	0.00291606
fraction	K02835	RP-L10e, RPL10; large subunit ribosomal protein L10e	0.0336238	0.0421732	0.024936	0.00368429	0.00212616		0.0280445	0.00262491	0.0025769	0.00526139	0.0202093	0.0594212	9.57028e-05	0.089751		0.00101944	0.00247414	0.000646373	0.0340717	0.0327848	0.00621588	0.511384	0.282289	0.0197339	0.237768	0.159047	0.00712946	0.335392	0.371235	0.0111311	0.32085	0.273159	0.111859	0.195806	0.145326	0.801689	0.231485	0.0814024	0.192414	0.320013	0.0479256	0.255829	0.00139822	0.00200363	0.00141764	0.000125005
fraction	K02836	RP-L11, MRPL11, rplK; large subunit ribosomal protein L11	0.00174804	0.00324709	0.00194909	0.000179417	0.000921334		0.00116856	0.00259821	5.7561e-05	0.000553683	0.0117236	0.00595453	0.000124239	0.0031179	0.000110907	4.27028e-06	0.000128228	0.00141947	0.0016984	0.00243117	9.49091e-05	0.00235877	0.000432105	0.00221021	0.00587099	0.00121833	0.00404085	0.00491307	0.00575259	0.00251766	0.000704902	0.0011013	0.00083384	0.00356679	0.00354619	0.0174172	0.0017112	0.00162128	0.00439379	0.00480156	0.00265184	0.00140738		0.00496016
fraction	K02837	RP-L13, MRPL13, rplM; large subunit ribosomal protein L13	0.0168363	0.048087	0.0169562		0.00106511		0.00978423	0.00331735	0.000636616	0.00975344		0.0133908	0.00272463	0.000264501	0.000553083	0.000871459		0.00116028	0.0134237	0.00792727			0.000115653	0.00010726	8.60798e-05	0.000111088	0.000336738	0.000777749	0.000965121	0.000130371		0.000217739		0.00104584	0.000663147	0.00029277	0.000200593	5.61983e-05	0.000606441	0.000876026	0.0295605	0.00105925
fraction	K02860	RP-L14, MRPL14, rplN; large subunit ribosomal protein L14	0.000239356	0.00276397	7.49746e-05		0.000156541		0.000129041	0.000282465		0.00319998		0.000201465		0.000488113	3.91277e-05			0.00193219	0.00164535	0.000997757	0.00137564			0.00617654			0.00682318	0.00576114	0.0153323	0.000774365		0.00176415			0.00421455	0.00311862	0.00714231	0.0019935	0.00561001	0.0118854	0.00152129	0.00404019
fraction	K02863	RP-L15, MRPL15, rplO; large subunit ribosomal protein L15	0.102735	0.450673	0.14891	0.0662683	0.129474	0.136543	0.655602	0.236158	0.200164	0.117425	0.215111	0.159586	0.0902714	0.263908	0.38021	0.0113459	0.0139741	0.398407	0.31293	0.613511	0.504591	0.669211	0.460142	0.361346	0.45983	0.39847	0.135032	0.290675	0.432349	0.0598956	0.129425	1.1675	0.223495	0.115807	0.268451	0.159242	0.102324	0.171716	0.140479	0.309639	0.217324	0.491154	0.0278598	0.162411	0.165459	0.555118	0.079051
fraction	K02864	RP-L16, MRPL16, rplP; large subunit ribosomal protein L16	0.231221	0.40782	0.148821	0.000489336	0.0202455	0.0975885	0.234812	0.123497	0.0253323	0.0247573	0.037511	0.0177393	0.00956285	0.0771007	0.0620206	0.00576902	0.00611861	0.0492367	0.249186	0.297074	0.050228	0.018155	0.0184809	0.047233	0.0078308	0.0614187	0.0782641	0.0381339	0.22304	0.016128	0.0163942	0.0665089	0.0604151	0.124256	0.0259234	0.0674288	0.0599801	0.0428707	0.0268893	0.0398299	0.0994296	0.126194	0.0117611	0.0296211	0.023484	0.0330209	0.0113318
fraction	K02866	RP-L17, MRPL17, rplQ; large subunit ribosomal protein L17	0.000424955	0.0051282	0.009811		0.00108732			0.000357499	3.22637e-06			0.00193039	0.0574415	0.000513048		0.00109131	0.0269803	0.0012101			0.0931494		0.00525774		0.0400724	0.00514616	0.000131503		0.120003				0.0482174		0.0221427		0.00660678	0.0157985		0.00183526
fraction	K02867	RP-L18, MRPL18, rplR; large subunit ribosomal protein L18	0.0506413	0.2207	0.0801948	0.00898748	0.0714143	0.147162	1.0037	0.0837562	0.12642	0.0628676	0.0984196	0.0668393	0.109562	0.0567269	0.687429	0.00633255	0.00515558	0.174525	0.657988	1.08487	0.286635	0.333239	0.186905	0.209678	0.0618761	0.0989199	0.0631956	0.16576	0.300607	0.0287562	0.0492188	0.211817	0.155875	0.0303818	0.29377	0.0450525	0.193249	0.138259	0.145851	0.242994	0.066509	0.139021	0.00206664	0.0143755	0.0146267	0.0181641	0.00263411
fraction	K02871	RP-L19, MRPL19, rplS; large subunit ribosomal protein L19	0.443522	0.386971	0.324081	0.0688298	0.137524	0.244927	0.401572	0.571524	0.153168	0.132188	0.309928	0.28675	0.148582	0.0728878	1.47417	0.0218497	0.0269402	0.452644	0.386547	0.632092	0.0286061	0.0547391	0.0568994	0.139197	0.181094	0.101345	0.390241	0.17223	0.375551	0.0216496	0.0403484	0.482044	0.137135	0.138934	0.143312	0.0651554	0.0472552	0.0338306	0.039905	0.21874	0.313707	0.143199	0.00247661	0.059055	0.00907105	0.00606769	0.00155237
fraction	K02874	RP-L2, MRPL2, rplB; large subunit ribosomal protein L2	0.916566	0.658619	0.589312	0.0100299	0.0315695	0.00721256	0.292374	0.3145	0.217267	0.0809716	0.0568789	0.0727923	0.111691	0.284685	0.244423	0.00661831	0.00652737	0.382598	0.217183	0.439469	0.347247	0.252609	0.267349	0.228732	0.166801	0.1171	0.0183571	0.283153	0.323977	0.0106466	0.111247	0.272682	0.0859158	0.0829345	0.247161	0.0188279	0.168715	0.106991	0.154035	0.240167	0.037204	0.0613413	1.59415e-05	1.21102e-05	0.000119543
fraction	K02876	RP-L20, MRPL20, rplT; large subunit ribosomal protein L20	0.422688	0.307643	0.0924325	0.0190253	0.0645946	0.0988676	0.462492	0.631026	0.761861	0.138737	0.0738579	0.330427	0.0858558	0.0470317	0.674903	0.00820341	0.00519928	0.228639	0.266693	0.522347	0.131501	0.0571498	0.0400593	0.0379951	0.0400887	0.0393952	0.0146714	0.193887	0.289468	0.00634262	0.0126102	0.0701606	0.0986435	0.0637318	0.119631	0.0117409	0.033823	0.0241543	0.0735947	0.201511	0.0213409	0.030326		0.000450674	0.000110478	0.000487531
fraction	K02878	RP-L22, MRPL22, rplV; large subunit ribosomal protein L22	1.18003	0.924085	0.683624	0.0290472	0.0605735	0.190477	0.378483	0.278196	0.278877	0.0964154	0.452676	0.305153	0.982244	0.224516	0.147404	0.0381224	0.0491472	0.246535	0.231975	0.250537	0.00364221	0.0134203	0.0134262	0.052991	0.0536897	0.0671746	0.00359981	0.0793657	0.103938	0.00211721	0.014889	0.108381	0.35524	0.0233795	0.214606	0.00542149	0.0257787	0.0122608	0.0338417	0.0761825	0.0100074	0.00345776	0.000858396	0.00117884			0.000257472
fraction	K02879	RP-L22e, RPL22; large subunit ribosomal protein L22e	3.10295	1.68614	1.16316	7.04767	0.761277	0.962011	1.90886	0.262767	0.704845	0.200372	2.01497	1.04953	4.03736	0.2631	2.64013	0.315207	0.155644	0.507923	1.68029	1.40558	0.0275321	0.0298575	0.0254589	0.118839	0.40208	0.114383	0.0240392	0.219699	0.402279	0.00379903	0.0394003	0.0451292	0.0375874	0.0229911	0.118792	0.0133159	0.0229201	0.0387233	0.064467	0.227509	0.0289819	0.0643954	0.000177177	0.0724407	0.0106704	0.0109443	0.0155975
fraction	K02881	RP-L23, MRPL23, rplW; large subunit ribosomal protein L23	0.087021	0.0987427	0.0487634	0.0680452	0.0489899	0.00398163	0.227043	0.0729274	0.0236501	0.0799067	0.0278248	0.0718466	0.12968	0.00854279	0.287278	0.00915157	0.0203453	0.106233	0.161543	0.451191	0.0153719	0.0384151	0.0294969	0.0437536	0.0430712	0.0229532	0.0416683	0.01191	0.0385665	0.0114368	0.0231606	0.0230764	0.00259356	0.00841769	0.0197028	0.0369843	0.0205506	0.0134205	0.00589448	0.0207293	0.0168759	0.140436		0.000488817		0.000107549
fraction	K02884	RP-L23Ae, RPL23A; large subunit ribosomal protein L23Ae	1.28019	1.2697	0.91078	0.0300436	0.297307	0.24032	1.90287	0.848453	0.209524	1.37353	0.280039	0.269175	0.201516	0.127602	1.84273	0.0635969	0.21613	0.741625	1.08709	1.51677	0.0987199	0.27239	0.260332	0.10853	0.0928516	0.154193	0.178173	0.320596	0.271181	0.212026	0.054586	0.278863	0.0945538	0.0291644	0.180648	0.176409	0.0463371	0.0301227	0.166725	0.245392	0.33084	0.192648	0.000515304	0.00822165		8.98955e-05	0.00357935
fraction	K02886	RP-L24, MRPL24, rplX; large subunit ribosomal protein L24	0.72066	0.518025	0.371509	0.0652649	0.110635	0.286592	0.587178	0.710448	0.170078	0.101047	0.103907	0.232759	0.068344	0.163944	0.46692	0.0196947	0.531678	0.747675	0.47986	0.537385	0.0179272	0.0239495	0.0220869	0.0573053	0.0500165	0.059696	0.098122	0.0730341	0.141923	0.00310034	0.0432297	0.0670309	0.0454947	0.0664116	0.196404	0.08153	0.0168284	0.023751	0.0590405	0.0895211	0.018537	0.0407884	0.000180072	0.0195208	0.00262817	0.018728
fraction	K02887	RP-L25, rplY; large subunit ribosomal protein L25	1.1676	0.693991	0.332182	0.0187005	0.474409	0.00976864	0.420541	0.11372	0.809969	0.0919554	3.19565	0.433978	0.888114	0.108065	0.780897	0.156496	0.577909	0.353723	0.449171	0.331816	0.0134566	0.0265928	0.0405046	0.104338	0.0912006	0.053662	0.0419576	0.0912843	0.165999	0.00101696	0.0494187	0.0194913	0.0220524	0.0212848	0.225962	0.0115312	0.0255692	0.026824	0.0381429	0.120083	0.052528	0.193913	0.00028528	0.00464866	0.00386539	0.000703795	0.00117511
fraction	K02890	RP-L27, MRPL27, rpmA; large subunit ribosomal protein L27	1.92582	1.27096	0.485576	0.0166871	0.0630913	0.0525707	0.955389	0.189543	0.878262	0.246986	0.305542	0.139301	0.112247	0.353515	1.43759	0.0152637	0.0712838	0.64034	0.645242	1.05123	0.0217477	0.0624434	0.0609654	0.132652	0.0670333	0.0572118	0.0330964	0.124277	0.1339	0.0458918	0.0263722	0.153186	0.0815786	0.0624418	0.109136	0.0365269	0.0212064	0.0193511	0.0500991	0.110933	0.0470806	0.0734556		6.40799e-05
fraction	K02891	RP-L27e, RPL27; large subunit ribosomal protein L27e					0.000988253							3.22007e-05						0.000392879					0.000230015	0.000405267	0.000831409	0.00022696		9.62853e-05						0.000577596		0.000306836	9.19194e-05		9.5355e-05	0.000194492		0.000317089	0.000164952			6.77512e-05
fraction	K02892	RP-L28, MRPL28, rpmB; large subunit ribosomal protein L28	0.377889	0.295987	0.184644	0.011185	0.0295535	0.0538182	0.439382	0.441869	0.0370216	2.08041	0.60235	0.266572	0.0605769	0.228051	0.857054	0.00556362	0.00933708	0.296961	0.31785	0.714726	0.180532	0.115643	0.0453455	0.0258448	0.0532212	0.0323607	0.0515432	0.0677645	0.0957311	0.00670275	0.0200217	0.10422	0.0436172	0.0121619	0.116891	0.128124	0.0203657	0.0242715	0.0285812	0.0795157	0.168262	0.0266995	0.00237103	0.00245507	0.000514284	0.00076176	0.000517018
fraction	K02893	RP-L3, MRPL3, rplC; large subunit ribosomal protein L3	0.000443415	0.00171157	0.0188238				2.89963e-05	0.0014213	0.000128139	0.000788863			0.0239533			0.00141055		0.000146237	0.000492706	0.000879206									0.000296382						0.00149368				0.000879653	0.000702136			0.030392		0.029782
fraction	K02895	RP-L32, MRPL32, rpmF; large subunit ribosomal protein L32	1.84703	1.14546	0.652151	1.22302	0.317954	1.32014	0.930497	0.164235	0.497854	0.081549	0.201168	0.0726582	0.129543	0.488275	0.472533	0.0462469	0.0871674	0.393837	0.558766	1.28684	0.0619529	0.17495	0.0495027	0.0516704	0.0444463	0.0415666	0.00825295	0.259374	0.304607	0.00631442	0.0305642	0.0884789	0.0957543	0.0469189	0.229185	0.0199065	0.0262685	0.0174713	0.105264	0.266297	0.0320012	0.0233422	7.67946e-05	0.000267196
fraction	K02897	RP-L34e, RPL34; large subunit ribosomal protein L34e	0.395286	0.339233	0.205141	0.00956136	0.063725	0.0142033	0.190732	0.0599575	0.0289879	0.0166996	0.00211284	0.022853	0.0879834	0.0201774	0.186951	0.00970264	0.0997518	0.00965553	0.17483	0.182446	0.0483635	0.0941149	0.100605	0.0103783	0.0768271	0.00475574	0.0169652	0.026725	0.0381841	0.008592	0.00762331	0.0383698	0.0260681	0.00460132	0.00791243	0.0149646	0.0274402	0.0238979	0.0137368	0.0279796	0.0257526	0.0403958	0.000471217	0.00749318	0.00201806	0.00108524	0.019306
fraction	K02899	RP-L4, MRPL4, rplD; large subunit ribosomal protein L4	9.52205	4.97156	3.90866	0.0662885	0.168958	0.0587807	2.259	0.954698	0.517105	0.372377	0.210926	0.320727	0.451766	0.401108	1.15331	0.0913082	0.00717566	0.344223	1.88579	2.14429	0.0241882	0.0146608	0.0110381	0.307549	0.191033	0.476361	0.0858883	2.21321	1.87345	0.00290857	0.329139	0.0245619	0.0466651	0.09067	1.61565	0.00678615	0.0420226	0.015681	1.04741	2.43601	0.0994731	0.848941
fraction	K02901	RP-L40e, RPL40, UBA52; ubiquitin-large subunit ribosomal protein L40e	0.00157888	0.000480502	0.0467174		0.00199298	0.0519857	0.000118969	0.0561002	1.66316e-05	0.0681036		0.115437		0.000397483	0.00861453	0.00315497		0.0021364	0.00173743	0.00359796
fraction	K02902	RP-L4e, RPL4; large subunit ribosomal protein L4e	1.34033	0.749152	0.957943	0.00397764	0.0409126	0.0609571	0.673773	0.22041	0.0522267	0.0895433	0.1277	0.129051	0.605586	0.289427	1.36454	0.0433199	0.00383582	0.613933	0.513855	0.491457	0.0130522	0.0357875	0.0338125	0.0709909	0.110865	0.0770653	0.0236712	0.0688857	0.159381	0.00153065	0.0296804	0.0665254	0.0366579	0.0168783	0.0325549	0.0284859	0.060496	0.0500061	0.030264	0.0410095	0.0419481	0.0519955	0.00521892	0.00154857	0.0299823
fraction	K02906	RP-L5, MRPL5, rplE; large subunit ribosomal protein L5	0.377342	0.404719	0.706912	0.278541	0.170499	0.175263	0.714931	0.602804	0.384422	7.84379	0.530138	0.227237	0.438725	0.250758	0.899403	0.143635	0.169176	0.712868	0.53268	0.600941	0.169203	0.326403	0.342716	0.284372	0.168891	0.18521	0.0516289	0.242165	0.313034	0.0310144	0.0775422	0.339579	0.0957662	0.095859	0.507987	0.150043	0.0986392	0.0574255	0.121742	0.233602	0.81604	0.111616	0.00268708	0.0284763	0.0251177	0.00313742	0.00298493
fraction	K02911	RP-L5e, RPL5; large subunit ribosomal protein L5e	0.104611	0.0503207	0.00585114	0.000307665	0.00300507		0.0127579	0.0222487	0.00247911	0.0145754	0.0128331	0.00613705	0.00151497	0.00305495	0.0537003	0.000755103		0.0163812	0.0168796	0.0652931	0.000357213	0.00182751	0.00192376	0.00205388	0.00427787	0.00687161	0.000394447	0.00796531	0.0322995	0.000270959		0.000973621	0.00214066	0.0310908	0.00441001	9.05506e-05	0.00382089	0.00627622	0.000486304	0.00487206	0.00216062	0.00019109
fraction	K02915	RP-L6, MRPL6, rplF; large subunit ribosomal protein L6	0.0125921		1.44565	0.456127			0.238232	0.0194717	0.00463991							0.000707414	0.342813	0.00464873	0.000505219					4.14106e-05			0.000707438							0.000205625		0.000136838					3.38019e-05	2.97705e-05
fraction	K02926	RP-LP0, RPLP0; large subunit ribosomal protein LP0	0.654795	0.426334	0.208092	0.124591	0.0830873	0.0795491	0.461697	0.85025	0.0363357	0.16074	0.134046	0.067675	0.331949	0.136822	0.513259	0.0461454	0.0862612	0.568695	0.379866	0.376872	0.106126	0.0572455	0.0314143	0.14492	0.0283756	0.124919	0.0363075	0.463204	0.52933	0.0203134	0.0431859	1.66972	0.126202	0.0287474	0.45691	0.0286672	0.0431953	0.0226963	0.21953	0.473725	0.0863138	0.113443	0.000154635	0.0131135	0.00544368	0.00145637	0.00194236
fraction	K02927	RP-S1, rpsA; small subunit ribosomal protein S1	0.0190753	0.0411036	0.571463	0.093241	0.290105	0.367744	0.980539	0.0564637	0.0799028	0.162726	0.11109	0.0446207	0.00386671	0.0527385	2.73472	0.213527	0.502529	0.0934661	1.17527	0.73636		0.0101061	0.0155038	0.0109002				0.000656792	0.00287774	0.00117672		0.00261178		0.0445255	0.0832764		0.00691527	0.00605331	0.00179485	0.000150356			0.0209751	0.00503977	0.031533	0.138026	0.132411
fraction	K02930	RP-S11, MRPS11, rpsK; small subunit ribosomal protein S11	6.84361e-05	8.56699e-05	0.0894427				3.77272e-05	1.69254e-05	4.28834e-05	0.000113446		8.23926e-05		8.31529e-05					6.18373e-05	0.000315553	0.00197543	0.00176801	0.00109633	0.000594764	0.000701875	0.000750031	0.000292398	0.00117864	0.00234415	2.55372e-05	0.00136072	0.00558943	0.00856614	0.0180507	0.00195257	0.000124051	0.00536453	0.0041934	0.00137446	0.000753227	9.69828e-05	0.000427691		0.00164957	0.0662436
fraction	K02931	RP-S12, MRPS12, rpsL; small subunit ribosomal protein S12	0.808769	0.77043	0.533244	0.224041	0.174934	0.155674	0.992278	0.0873497	0.188128	0.370004	0.240796	0.264187	0.367321	0.429562	0.837169	0.174204	0.23411	0.348529	0.662679	0.907316	0.206255	0.60547	0.237552	0.0853473	0.0852497	0.0933799	0.0786915	0.142542	0.265955	0.198496	0.0786824	0.183556	0.134161	0.0491289	0.170475	0.131562	0.0419774	0.0321832	0.0683241	0.196736	0.22375	0.111335	0.0138994	0.109961	0.0839344	0.0569586	0.0123655
fraction	K02932	RP-S13, rpsM; small subunit ribosomal protein S13		0.000435928	0.0180859				0.00016874		1.80034e-05	0.000853637	0.00285241	0.000548906			0.000714091				0.000919337	0.00227903		0.000240333	0.000638701		1.70514e-05		0.000516093	4.01809e-05	0.00219439	5.627e-05	0.00145177	5.16732e-05	0.000454267		0.000526238	0.00196077	1.991e-05	1.68349e-05	1.82519e-05	6.90888e-05	0.000106678	9.46256e-05
fraction	K02933	RP-S13e, RPS13; small subunit ribosomal protein S13e	0.200643	0.20408	0.0733098	0.0252394	0.0827759	0.0397686	0.91916	0.259344	0.0652879	0.0721277	0.0540365	0.144991	0.0924843	0.675261	0.34663	0.108466	0.0529211	0.153361	0.443567	0.587911	0.961313	0.820326	0.957216	0.161522	0.218227	0.117479	0.0539593	0.14774	0.3066	0.049588	0.0694187	0.145324	0.181889	0.143941	0.372191	0.042004	0.101393	0.0690231	0.163466	0.219644	0.0782289	0.116821	0.00115976	0.0198452	0.00564076	0.0309365	0.0445932
fraction	K02941	RP-S15, MRPS15, rpsO; small subunit ribosomal protein S15	0.000132849	0.000110745	0.00239388		0.00969736		0.000317302	8.23717e-05	1.14689e-05	0.00106306		0.000126565	0.00381248	8.78785e-05			0.000512158	0.00169941	3.61828e-05	0.000406128							0.000152699									0.00364503		0.000203877			0.000199738	0.000304946	0.00824705	0.0112628	0.0339401	0.026784	0.119464
fraction	K02945	RP-S16, MRPS16, rpsP; small subunit ribosomal protein S16	0.0922146	0.242399	0.158755	0.139111	0.1332	0.0691105	0.591953	0.684507	0.0721922	0.311269	0.218495	0.348827	0.794327	0.127953	0.227222	0.0310955	0.0870781	0.610527	0.228984	0.208626	0.104284	0.687276	0.650745	0.245829	0.119365	0.136046	0.0549403	0.154157	0.246071	0.0343842	0.088674	0.164492	1.55974	0.282981	0.199549	0.0531984	0.366294	0.213431	0.111454	0.210168	0.171557	0.242027	0.0242763	0.829464	0.181776	0.0319856	0.110346
fraction	K02948	RP-S17, MRPS17, rpsQ; small subunit ribosomal protein S17	0.353595	0.472568	0.524175	0.00435972	0.0257107	0.0797634	1.03644	0.230188	6.08477	0.0922865	1.32488	0.574478	0.0644513	0.0577575	0.511262	0.010168	0.00888579	0.173233	0.378037	0.499903	0.394516	0.275326	0.22573	0.171238	0.193359	0.131517	0.0457483	0.197589	0.284923	0.0250201	0.0700402	0.214315	0.144871	0.0623961	0.220982	0.235565	0.38984	0.327263	0.117186	0.155907	0.126585	0.490204	0.146817	0.104722	0.0317865	0.107018	0.154231
fraction	K02950	RP-S18, MRPS18, rpsR; small subunit ribosomal protein S18	0.0191724	0.0916632	0.395043	0.0314594	0.000871123		0.00667554	0.0258007	0.234086	0.00206136	0.169373	0.10755	0.0507119	0.00346713	0.00438571	3.49757e-05	0.00730174	0.0373919	0.00914157	0.0477696	0.00187942	0.00137306	4.21586e-05	0.0214153	0.0131251	0.00783764	0.00404683	0.0312551	0.028687	0.00322493	0.0259819	0.000504987	0.00832282	0.000856261	0.0699242	0.0245429	0.0195713	0.0245113	0.0246765	0.02051	0.0146352	0.0314718		5.81741e-06
fraction	K02952	RP-S19, rpsS; small subunit ribosomal protein S19	0.885842	1.11565	0.439985	0.0254894	0.0936109	0.0251028	0.326907	0.109684	0.782424	0.297425	0.404331	0.0797765	0.271742	0.0927645	0.189812	0.0244495	0.0528446	0.296981	0.307663	0.582476	0.0146562	0.0261217	0.0263443	0.0235576	0.0116903	0.0325852	0.0128796	0.0768014	0.1089	0.00357332	0.0126027	0.107394	0.496235	0.202942	0.0701755	0.0480017	0.0508508	0.0307748	0.0337537	0.0995822	0.0220534	0.0122425	0.000705347		0.000234398		0.000607341
fraction	K02953	RP-S19e, RPS19; small subunit ribosomal protein S19e	0.000200073	0.00039225	0.0255601		0.00056598		0.000504991	7.05403e-06	1.08355e-05	0.000441169		0.000134499			1.93995e-05		0.000104267	1.82467e-05	0.000580233	0.000810443		8.01953e-05		0.00425631	0.00713766	0.00438589	0.00278397	0.00176574	0.00671504	0.000930409	0.00274386	0.0607248	0.00113545	0.000434364	0.00620091	0.0051274	0.000995761	0.00228831	0.00141905	0.00134057	0.000713804	0.000284465
fraction	K02956	RP-S2, MRPS2, rpsB; small subunit ribosomal protein S2	0.124441	0.307431	0.585878	0.0237347	0.0412523	0.0645665	0.199251	0.0523195	0.0215912	0.142447	0.276937	0.213176	0.200909	0.0200371	0.222552	0.0103246	0.0264738	0.0327598	0.112075	0.119548	0.000832423	0.0296488	0.0428961	0.0060012	0.00855074	0.0332232	0.000691654	0.0168501	0.0226382	3.44467e-05	0.00194105	0.00626619		0.0204877	0.00879739	6.91626e-05	0.00615201	0.00762646	0.00610413	0.0122926	0.00526975	0.014338
fraction	K02959	RP-S21, MRPS21, rpsU; small subunit ribosomal protein S21	0.0787324	0.110642	0.558651	0.0403101	0.223224	0.0165963	0.43373	0.456727	0.455612	0.0526794	0.0438507	0.120069	0.291522	0.0180965	0.123912	0.0361136	0.0187609	0.299716	0.215339	0.112847	0.0401386	0.0207683	0.034888	0.0564733	0.0187637	0.0336352	0.0331205	0.0680926	0.0744105	0.0020858	0.0187986	0.046095	0.02129	0.0189067	0.0608486	0.0266501	0.0259943	0.0165286	0.0192152	0.0804117	0.109367	0.0441436	0.0518516	0.00728295	0.0321914	0.0143209
fraction	K02961	RP-S27Ae, RPS27A, UBA80; ubiquitin-small subunit ribosomal protein S27Ae	0.424241	0.426608	0.190116	0.0334681	0.0376936	0.0427819	0.768485	0.12156	0.145996	0.104989	0.0254994	0.0725553	0.0230211	0.128568	0.245369	0.0784642	0.139716	0.394009	0.517055	0.816954	0.0366091	0.0849266	0.0601353	0.0514522	0.0293781	0.0203606	0.0633152	0.134979	0.120918	0.00342191	0.0258133	0.0124077	0.0275484	0.0370829	0.146277	0.0146721	0.0176808	0.00882974	0.105249	0.119034	0.020701	0.0314832	0.000138309		0.00286825	0.00373401
fraction	K02963	RP-S3, rpsC; small subunit ribosomal protein S3	2.82267	2.34244	1.20289	0.0380182	0.0202569	0.0277661	1.0252	0.0514565	0.123584	0.0370667	0.0777896	0.12711	0.5391	0.102587	0.391427	0.0039323	0.0222296	0.0540341	0.905164	1.20539	0.00360726	0.0227822	0.0160866	0.0326356	0.0256463	0.0444457	0.0186028	0.191249	0.105241	0.0042842	0.00884161	0.0776694	0.0315475	0.0438474	0.09038	0.0364014	0.00845423	0.0143884	0.0453328	0.11561	0.0368872	0.0518627		0.00298938	0.000148258
fraction	K02965	RP-S30e, RPS30; small subunit ribosomal protein S30e	1.87548	1.18636	0.386721	0.0204143	0.0471593	0.0606986	0.42221	0.240674	1.00644	0.0456173	0.0910491	0.0484416	0.0217187	0.0202535	0.25236	0.00406409	0.00779432	0.0633752	0.337028	1.11843	0.0101921	0.00145872	0.00290566	0.023185	0.0261363	0.0279433	0.0109139	0.0830198	0.104332	0.00118361	0.0293106	0.104523	0.0512524	0.178696	0.106856	0.00976497	0.0169111	0.0153727	0.0404429	0.0857498	0.0644651	0.0466755
fraction	K02966	RP-S3e, RPS3; small subunit ribosomal protein S3e	0.000116085	0.000798814	0.0104645		0.000233689		0.000290724		6.37229e-06	0.000186685		0.000331463		9.78567e-06	3.23162e-05	6.97336e-06		8.07913e-05	8.9971e-05	0.000182898		0.00355769		0.0104358		0.000608655			4.21738e-05		0.0294554		0.00229108	0.0115946	0.0558072	3.17956e-05	0.0144816	0.0153993	0.00799239			0.00573643	0.0038406		0.000936792		0.00262814
fraction	K02967	RP-S4, rpsD; small subunit ribosomal protein S4	1.35002	1.81531	1.02045	0.0189539	0.0503093	0.0455821	0.29055	0.294481	0.189027	0.0568367	0.120319	0.0689461	0.0307927	0.158107	0.159186	0.0109726	0.027177	0.151939	0.221936	0.468202	0.0873721	0.151196	0.0997387	0.2772	0.178644	0.0841657	0.0683825	0.105786	0.168919	0.0400759	0.0748921	0.0804056	0.0765871	0.074347	0.311014	0.0761472	0.147956	0.280561	0.0992287	0.136117	0.114559	0.197257	0.00526459	0.00603181	0.00544904	0.0123153	0.00818232
fraction	K02970	RP-S5, MRPS5, rpsE; small subunit ribosomal protein S5	1.03866	1.06263	0.786892	0.0047587	0.00320404	0.00468404	0.60896	0.0343542	0.0480683	0.0682398	0.00572442	0.00613363	0.0360879	0.0173862	0.166661	0.000750491	0.00093221	0.0166072	0.401572	0.40822	0.00269629	0.007355	0.00571664	0.18264	0.0378784	0.146943	0.106817	0.282301	0.41299	0.0988084	0.054474	0.216705	0.41729	0.0435918	0.0767507	0.10096	0.0375742	0.0453778	0.0856155	0.20561	0.0160685	0.158688	0.000234481	0.00737474	0.001206		0.00283782
fraction	K02977	RP-S6, MRPS6, rpsF; small subunit ribosomal protein S6	0.0249985	0.0524331	0.830901	0.0875024	0.279942	0.338373	1.40172	0.0713512	0.112175	0.198494	0.129002	0.0651358	0.00488943	0.0735083	3.86166	0.248756	0.695435	0.0948321	1.68063	1.05519	7.89413e-06	0.0103418	0.0142467	0.00295852		0.000231182	0.00218467	0.0063224	0.000703754	0.00127782	0.00187206	0.0046136	0.00118589	0.0233794	0.052385	0.000248423	0.00646465	0.00456199	0.00151703	0.00602605	0.000690804	0.00161982	0.0867175	0.0252061	0.0528179	0.326629	0.206866
fraction	K02982	RP-S6e, RPS6; small subunit ribosomal protein S6e	0.985324	1.44387	1.2749	0.0340197	0.0956685	0.035341	1.62026	0.437514	0.379713	0.0562159	0.319072	0.227458	0.140043	0.134626	0.767303	0.0194244	0.0255585	0.262572	0.791226	1.29474	0.0382395	0.150692	0.141467	0.163462	0.0943778	0.153045	0.0607531	0.157734	0.213051	0.00871556	0.0343061	0.200496	0.106123	0.0330635	0.110685	0.0691298	0.0640612	0.0554905	0.0555957	0.148516	0.0486906	0.0909469	0.00242384	0.0148167	0.0132665	0.00559578	0.00138028
fraction	K02983	RP-S9, MRPS9, rpsI; small subunit ribosomal protein S9	0.000855539	0.00156407	0.0312169		0.00167503		0.0433942	0.00212332	0.00335099	0.00511975	0.00126428	0.00329139		0.00314954	0.11877	0.00586203	0.0299049	0.000923974	0.0529094	0.0353434		0.000296346	0.000559294	0.000125758						4.4195e-05		0.000109416		0.00196839	0.00345202		0.000219208	0.00022678	7.51918e-05				0.000655012	0.00034597	0.00234749	0.015704	0.0125821
fraction	K02985	RP-S9e, RPS9; small subunit ribosomal protein S9e	0.0838038	0.00657058	0.0105782		0.294326		0.00121151	0.00450157	0.000496924	0.188846	0.0553464	0.0454442		1.4583e-05	2.09935e-06	0.0611076		0.00533845	0.0018214	9.56158e-05	0.57506	0.0566275	0.00518373	0.0713962	0.0894349	0.0080241	0.00280139	0.0687679	0.0400392	0.0217769	0.141408	0.0784066	1.00542		0.208747	0.40074	0.233389	0.0884477	0.0719312	0.107027	0.0186741	0.017097	0.125358	0.197969	0.106424	0.0789606	0.145597
fraction	K02986	RP-SAe, RPSA; small subunit ribosomal protein SAe	0.714562	0.816271	1.10279	0.0490813	0.0885678	0.120291	0.994378	0.327889	0.149436	0.21227	0.08382	0.204863	0.104883	0.161404	1.53471	0.0576524	0.313792	0.51778	0.575517	0.669161	0.352812	0.129723	0.134865	0.134013	0.19288	0.115511	0.0929272	0.248138	0.366628	0.0357308	0.0955515	0.206677	0.32472	0.09432	0.39734	0.125302	0.12328	0.0909444	0.110599	0.270381	0.129397	0.348653	0.0696406	0.227852	0.166925	0.510694	0.0140151
fraction	K02988	RPB1, POLR2A; DNA-directed RNA polymerase II subunit RPB1 [EC:2.7.7.6]	0.379882	0.614476	0.476139	0.050574	0.827197	0.0970284	0.378366	0.064652	0.450728	0.190883	0.206949	0.386104	0.0925977	0.0975713	0.196942	0.00663861	0.0213497	0.17247	0.208803	0.467019	0.164267	0.378814	0.26425	0.230479	0.181501	0.160581	0.0349141	0.23588	0.263987	0.0110342	0.136344	0.178098	0.244629	0.18612	0.348137	0.0288283	0.148045	0.144765	0.145129	0.208797	0.360765	0.107501	6.01399e-05	0.00438305	0.0133561	0.00225329
fraction	K02990	rpoB; DNA-directed RNA polymerase subunit beta [EC:2.7.7.6]	0.0320845	0.0406582	0.0220763	0.00088434	0.0208713	0.0893878	0.119376	0.0614221	0.0493392	0.0150487	0.0187436	0.0328814	0.00839233	0.0423398	0.0474729	0.0143726	0.167814	0.0662981	0.101398	0.0684353	0.0141732	0.0169727	0.0169185	0.131732	0.0602804	0.0624915	0.075737	0.0602723	0.0629721	0.224301	0.075985	0.161116	0.0472185	0.0355128	0.045083	0.0312054	0.0249265	0.016175	0.0382829	0.0743036	0.0635938	0.117005	0.0596451	0.0443925	0.0559972	0.0357938	0.114385
fraction	K02991	rpoC; DNA-directed RNA polymerase subunit beta' [EC:2.7.7.6]	2.55431e-05		0.00374984		0.00411164			0.000576984	8.76814e-06		0.000219177			0.000468807		4.88145e-05		0.000513628	2.44774e-05		0.00306675	0.00982021	0.0167225	0.00826958	0.00668658	0.00771437		0.00833255	0.00404027	3.79339e-05	0.00324971	0.000126071	0.00167405	0.0017297		3.65198e-05	0.00511929	0.00788988	0.0036909	0.00565717			0.000103002	5.6097e-05	0.000272712	0.000904417	0.000497637
fraction	K02996	PSMC4, RPT3; 26S proteasome regulatory subunit T3	0.732812	0.838535	0.717408	0.110638	0.151634	0.0109187	1.30873	0.108303	0.210319	0.0829356	0.227022	0.235569	0.0655165	0.101414	0.474867	0.0194433	0.034855	0.0894385	0.451925	0.56642	0.0317483	0.0546839	0.0513515	0.040166	0.021948	0.0342327	0.0279566	0.0914012	0.122832	0.0115719	0.0208511	0.043708	0.073905	0.122188	0.0605284	0.0390393	0.0145437	0.0157317	0.0361558	0.0823172	0.0777769	0.0336882
fraction	K02997	secA; preprotein translocase subunit SecA [EC:7.4.2.8]	0.0975407	0.919437	1.72196				0.0632615	0.0194019	0.000485088	0.228285				3.94468e-06	0.00160669					0.0239185		1.44635e-05		0.000326108	0.000323249	0.000487054	0.00751185	0.0015069	0.000520027	0.00159199	0.000837843				6.4189e-05	0.00115253	0.00024511	0.000404416	0.000139292	0.000487761	0.000580351	0.00182185
fraction	K02998	secB; preprotein translocase subunit SecB	0.0015919	0.00216246	0.000689072		0.000646884		0.000964016		2.90069e-05					0.000669002				0.000537866	0.000141854		0.00350688	0.000855342	0.00113159	0.00592409	0.00287427	0.000775245	0.00376271	0.00389331	0.00400959	0.00329711	0.00329094		0.000907835	0.000456581		0.00308759	0.00026677	0.00436434	0.00941221	0.0063708	0.00203023	0.00397222	0.000654446	0.00728785	0.000124889	0.000624495	0.0038381
fraction	K03006	secD; preprotein translocase subunit SecD					0.000169268								0.00033212				8.74991e-05				0.004139	0.00164716	0.00395509	0.00969832	0.00610809	0.0112625	0.00219627	0.00239715	0.00689148	0.000646494	0.00150399	0.000940039	0.00927393	0.0173092	0.000770253	0.00125487	0.0129645	0.0128674	0.0125379	0.00240776	0.00329278	0.00252113	0.00184169	0.00119462	0.000412919	0.000312922	0.00417455
fraction	K03043	secF; preprotein translocase subunit SecF	0.252919	0.434992	0.21449	0.0274388	0.0614177	0.0818183	0.24914	0.476321	0.125765	0.164531	0.205782	0.0771044	0.188339	0.182097	0.0954157	0.131529	0.0756224	0.780479	0.193236	0.120634	0.127776	0.415247	0.454096	0.3536	0.291549	0.283271	0.215783	0.279371	0.371371	0.143799	0.143429	1.25323	0.691018	0.458194	0.319189	0.188884	0.268345	0.212651	0.168136	0.441866	0.457591	0.12405	0.0209042	0.0742764	0.0717467	0.268288	0.0157166
fraction	K03046	secG; preprotein translocase subunit SecG	0.144843	0.417958	0.335305	0.150046	0.17409	0.0718056	0.143593	0.315131	0.0846057	0.0874564	0.554993	0.418785	0.151283	0.070617	0.188029	0.0140607	0.915464	0.228827	0.0930244	0.0631753	0.153511	0.338341	0.35344	1.43433	1.73024	1.68972	0.299754	0.269638	0.361576	0.0967431	0.22048	0.383853	0.588148	0.440558	0.449196	0.108912	0.818021	0.703613	0.221707	0.287293	0.142069	0.378112	0.101422	0.17909	0.21507	0.333131	0.0655461
fraction	K03063	secY; preprotein translocase subunit SecY																						9.34058e-06	1.44823e-05				6.33746e-05			8.8639e-06						6.83273e-05	8.28635e-07	5.30885e-07		4.96455e-07		4.75271e-05	8.61296e-05	5.62636e-05		0.000425491	0.0003047
fraction	K03070	rpoD; RNA polymerase primary sigma factor	0.11168	0.23158	0.390766	0.251591	0.0251515	0.810325	0.0728475	0.121267	0.00869689	0.23092	0.0659496	0.186264	0.0365269	0.0606943	0.0278626	0.15086	0.00862335	0.156769	0.106287	0.068386	0.0121617	0.0465972	0.0627919	0.00868451	0.0105289	0.00649484	0.00498712	0.0251626	0.0234899	0.007597	0.00587384	0.0257151	0.0252334	0.0131145	0.425465	0.0044739	0.00652595	0.00559735	0.015359	0.0127638	0.00430977	0.0112297	0.00329322	0.0432326	0.165278	0.0254618	0.219359
fraction	K03071	rpoS; RNA polymerase nonessential primary-like sigma factor	0.569721	0.565476	0.252831	0.00645849	0.0146414	0.00420425	0.214662	0.0897786	0.0106717	0.51862	0.0164254	0.0717859	0.0143978	0.659728	0.13399	0.00204697	0.0528237	0.194817	0.222335	0.198819	0.0129805	0.0141178	0.0138677	0.00192464	0.000671016	0.00628116	0.00252388	0.0253587	0.0305369	0.00319924	0.00171913	0.0212576	0.00900489	0.0010568	0.0247946	2.40213e-05	0.00373681	0.00310323	0.0295218	0.032193	0.0299832	0.000325846	0.00115616	0.0300356	0.0260071	0.000203536	0.0105097
fraction	K03072	rpoE; RNA polymerase sigma-70 factor, ECF subfamily	0.212696	0.152958	0.250358	0.0853178	0.00763609	0.0113998	0.036887	0.061847	0.00192626	0.0780448	0.0370437	0.0545128	0.0490806	0.119942	0.0286664	0.0163441	0.0225855	0.111805	0.04305	0.0307608	0.00380681	0.00632264	0.00402512	0.0248678	0.00934838	0.00967857	0.00340072	0.0296986	0.0400062	0.000782392	0.00361774	0.0616492	0.0172339	0.0180474	0.00724377	0.00516607	0.0235744	0.0248467	0.013393	0.0253462	0.00237836	0.00186612		0.00357142	0.000765526	0.000161565
fraction	K03074	rpoH; RNA polymerase sigma-32 factor	0.0220871	0.0150594	0.00622312	0.00184802	0.00406147	0.00264295	0.00139869	0.00523171	0.0147876	0.0111247	0.000846649	0.00343075	0.00543716	0.0183162	0.00161871	0.000773806	0.000901832	0.0226083	0.000820408	0.000945465	0.00281491	0.00164093	0.00118017	0.000329464	0.000164135	0.000696535	0.000216872	7.31169e-05	0.00294945	4.91594e-05	0.00237678	0.000521653	0.000309858	0.00703193	0.00119504	0.000321687	0.00136037	0.001074	8.63338e-05	0.00259931	0.000339846	0.000697604
fraction	K03075	SKP1, CBF3D; S-phase kinase-associated protein 1	2.22614e-05	0.000136307	0.0201172				0.000386027	1.83585e-05		0.000294817	0.000104211							0.000145119		0.000380525	0.000618432	0.0249276	0.0134818	0.00570968				0.00170322	0.00230831				0.00253245			0.000255632	0.00130152	0.00160557	0.00222626	0.000656486
fraction	K03076	APOD; apolipoprotein D and lipocalin family protein	0.152071	0.0717631	0.0851302	0.00260334	0.518174	0.301221	0.0739009	0.0460655	0.001631	0.013352	0.0207388	0.00416102	0.00430858	0.00954207	0.0301453	0.00989176	0.0604874	0.0240997	0.0277622	0.0299993	0.000287671	0.00848298	0.00767302	0.00843881	0.010916	0.00643515	0.014417	0.0181462	0.0225256	0.00208153	0.00346737	0.0532493	0.00330368	0.0148147	0.00884889	0.00148067	0.00282765	0.00291416	0.00722467	0.0157074	0.00367683	0.0164968
fraction	K03086	lepB; signal peptidase I [EC:3.4.21.89]	0.0324484	0.0748916	0.0681757	0.00278091	0.00441424	0.00404609	0.0172098	0.0096835	0.0172126	0.0112726	0.0210841	0.0129384	0.00837503	0.00567741	0.0106366	0.00247842	0.0036958	0.0100186	0.0225523	0.0182326	0.0018006	0.0128891	0.0114851	0.0427198	0.0246681	0.0215062	0.0124492	0.0468225	0.0230279	0.0101529	0.0516507	0.0269032	0.0268422	0.0278367	0.0967177	0.0121932	0.0204058	0.0150493	0.0126302	0.0376454	0.0852577	0.0260162	0.000677809	0.00384992	0.0142723	0.00152541
fraction	K03087	ftsY; fused signal recognition particle receptor	0.0378646	0.10009	0.000426424				0.0150518	0.0178031	0.000857505	0.000921524	0.0111036	0.0114097	0.000196654	0.000263586		0.00170095		0.00462349	0.00347629	0.00520011								6.54334e-05							0.000150429						0.000133157
fraction	K03088	ssb; single-strand DNA-binding protein	0.00743982	0.0128278	0.0291367	0.000711939	0.00201813		0.00137424	0.00091109	0.000218652	0.0142807	0.164473	0.00952597		0.0022289	0.0063894	0.000124757		3.56911e-05	0.0034141	0.0314662		2.15597e-05	4.91077e-05	0.000325099		8.43884e-05	9.54664e-07		4.15083e-05		0.000308169			7.81047e-05		9.24901e-06	0.000533506	0.00022482	0.000744024		0.000382015	0.00187549	3.32671e-05	0.000358221	0.00535225	0.00139831
fraction	K03089	topA; DNA topoisomerase I [EC:5.6.2.1]	8.58366e-06	7.535e-06	0.000236998				4.70842e-05	0.00060574	5.58805e-07	1.44526e-05	2.60309e-05	2.46512e-05		0.000591985	4.24241e-06			0.00039242	1.28653e-05	6.44418e-06	2.494e-05	0.000166708	0.000745171	0.000670705	0.000210049			0.000201675	0.000267435		0.000232679	0.000375554	0.000310992	7.45235e-05					0.000469821	2.90708e-05
fraction	K03094	truB, PUS4, TRUB1; tRNA pseudouridine55 synthase [EC:5.4.99.25]	0.000197052	0.000356549	0.0066228		0.000427141		0.0083339	0.000541458	0.000646735	0.00122831	0.000322398	0.000839323		0.000795974	0.0229778	0.00141034	0.00751135	0.000226835	0.0101996	0.00711969																							0.000856324	6.25173e-05	0.0189654
fraction	K03098	UBE1, UBA1; ubiquitin-activating enzyme E1 [EC:6.2.1.45]	0.0433026	0.014655	0.00879595	0.00134667	0.000841255		0.00109904	0.00816283	4.84795e-05	0.0153877	0.000699872	0.00161768	0.00235056	0.00721768	0.00115928	0.00128645	0.00130123	0.0792608	0.00112658	0.00100936		8.98955e-05									0.000112738
fraction	K03100	ubiE; demethylmenaquinone methyltransferase / 2-methoxy-6-polyprenyl-1,4-benzoquinol methylase [EC:2.1.1.163 2.1.1.201]	0.0399368	0.0959258	0.038789	0.000338583	0.00759491	0.00190268	0.0195239	0.0252865	0.103645	0.0284851	0.0250745	0.377818	0.042487	0.0112198	0.045233	0.00172808	0.00260535	0.0608903	0.0322342	0.0168565		2.43818e-05	0.00337309	0.00385968	0.00246559	0.00129827		0.0093021	0.00941883	0.00138875		0.00123084	0.007364	0.00404691	0.00754736	0.00222109	0.00363363		0.00250253	0.010522	0.00160331	0.000128204
fraction	K03110	ubiX, bsdB, PAD1; flavin prenyltransferase [EC:2.5.1.129]	0.00252748	0.00733063	0.0610149	0.0205781	0.0176129	0.00473759	0.0116127	0.0185342	0.000832652	0.01429	0.0099867	0.012075		0.00389978	0.0017744	0.000425462	0.00483481	0.0100416	0.00881424	0.0138342	0.182418	0.188078	0.179029	0.00453856	0.00389443	0.00418909	0.00967759	0.0791761	0.091904	0.127243	0.000347094	0.0695087	0.0173936	0.00163505	0.0270504	0.000567284	0.00491384	0.00296791	0.0439008	0.074193	0.0177745	0.00895201	2.9248e-05	0.000889765		0.00042971
fraction	K03111	yajC; preprotein translocase subunit YajC	0.181607	0.247791	0.245816	0.304026	0.0155017	0.243156	0.0945268	0.33665	0.0144137	0.0400629	0.0290627	0.157548	0.294561	0.126059	0.241187	0.00909101	0.0097578	0.0743763	0.154485	0.236783	0.0590144	0.0518127	0.0285331	0.374697	0.206383	0.0634305	0.0670331	0.695872	0.713139	0.0278486	0.180192	0.00947677	0.131423	0.0999589	0.31594	0.158089	0.371251	0.214166	0.48342	0.78589	0.0660978	0.101433	0.0331232	0.0487321	0.0118908
fraction	K03168	yidC, spoIIIJ, OXA1, ccfA; YidC/Oxa1 family membrane protein insertase	0.0444283	0.0725303	0.044545	0.0124454	0.155166	0.00158453	0.0280464	0.018769	0.00257469	0.00849622	0.0038046	0.0551105	0.00952047	0.0470075	0.0234629	0.000527688	0.000208777	0.0564619	0.0808662	0.0385738	0.0249737	0.0195813	0.0177748	0.0327506	0.0307959	0.067512	0.0121722	0.0207287	0.0343246	0.0110964	0.00787349	0.0219465	0.0141374	0.00132629	0.0192978	0.00457458	0.0594855	0.0405354	0.0144509	0.0413892	0.0031501	0.00912277	5.22434e-05	0.000680891		0.00031217
fraction	K03177	rlmB; 23S rRNA (guanosine2251-2'-O)-methyltransferase [EC:2.1.1.185]			0.000617863	0.00700698	0.0014164		4.32247e-06	6.85594e-06		3.43576e-06			0.000135596		4.15111e-05			2.78232e-05		3.3902e-05	0.000930463	0.00771151	0.00405837	0.00529547	0.00715862	0.00147026		8.54704e-05	0.000168637		0.000143809			0.00311031	0.00220255	0.000588264	0.00121421	0.00142463	0.000113321	6.52209e-05	0.000580158
fraction	K03178	EEF1A; elongation factor 1-alpha	8.00835e-05	2.59719e-05			0.000226651			4.18826e-05		4.25508e-05			5.08143e-05	0.000381518						6.5812e-06			8.15764e-05	3.70759e-06	1.30312e-05						6.54908e-06				1.06443e-05	3.4992e-05	5.50183e-06	2.84417e-06	1.32823e-05	1.99532e-06			2.17201e-05	0.00580082	0.00364148	0.0169283	0.0956181
fraction	K03183	kdsC; 3-deoxy-D-manno-octulosonate 8-phosphate phosphatase (KDO 8-P phosphatase) [EC:3.1.3.45]	0.0163071	0.0161044	0.00590114	0.0104563	0.00500784	0.00516212	0.007975	0.0435908	0.000615183	0.0455784	0.00502414	0.0105021	0.000392956	0.00956339	0.00365372	0.00300517	0.00246368	0.0129774	0.0130954	0.0258365	0.00235625	0.00552711	0.0068723	0.0123351	0.00320729	0.00211614	0.003223	0.00113812	0.0130893	7.38151e-06	0.00041976	0.0134485	0.0109381	0.00999719	0.0046405	0.000723586	0.00227088	0.00236937	0.00535566	0.0118822	0.000817967
fraction	K03186	gmhD, rfaD; ADP-L-glycero-D-manno-heptose 6-epimerase [EC:5.1.3.20]	0.00967991	0.0258603	0.0197645	0.00271912	0.00805534	0.00175136	0.0226963	0.00386927	0.000631942	0.0218074	0.00417567	0.00394913	0.0040862	0.0203412	0.00415741	0.000178848	0.0206624	0.0026509	0.0155249	0.0107714							0.000412408	0.000399678	0.000273224	3.91729e-05			0.0056937		3.57819e-06	0.000266445			0.000649187	0.000798518		0.000506119
fraction	K03210	mscL; large conductance mechanosensitive channel	0.091902	0.12027	0.0447055	0.0063816	0.0205776	0.18624	0.0920927	0.14026	0.00433683	0.0758707	0.00432117	0.0492181	0.00957843	0.169404	0.127547	0.00569257	0.00996632	0.136586	0.0662471	0.040137	0.00162928	0.0113907	0.0163077	0.00855854	0.00161219	0.00413912	0.166425	0.0152878	0.0605775	0.000562381	0.00434526	0.00330874	0.0100422	0.0096578	0.00847676	0.00106164	0.00597224	0.00304002	0.00979983	0.0199709	0.00186864	0.00304771	0.00462655	0.00212058	0.000186351	0.00650958	0.00015577
fraction	K03217	HSPA1s; heat shock 70kDa protein 1/2/6/8	0.0147742	0.0107133	0.0128208	0.00393273	0.00462961	0.00496741	0.00498147	0.408725	0.000502187	0.0187754	0.00341394	0.0154861	0.00593967	0.0354682	0.0030509	0.00671843	0.00716272	0.0854723	0.00285814	0.00139537	0.00120401	0.000529502	0.000506078	0.00264659	0.00190183	0.00313708	0.00175984	0.00448765	0.013008	6.56511e-05	0.000582183	0.00234907	0.0111538	6.68513e-05	0.00157725	0.00100254	0.00208308	0.000635988	0.00314987	0.00653118	0.000855864	0.000727869	2.68345e-05	9.12372e-05	2.03095e-05
fraction	K03218	TC.GBP; general bacterial porin, GBP family	0.00164127	0.00416493					0.0015226	0.000812471	0.000225236	3.61005e-05		0.000324501		0.000462565	0.00403942				0.00380534	0.00395101	0.0379769	0.00293688	0.004469	0.0363584	0.00279902	0.0022148	0.001503	0.00691387	0.00496815	0.00104747	0.00823878	0.0214182	0.00997912	5.27646	0.0529573	0.00168195	0.00148489	0.000773443	0.0250439	0.00333523	0.0029941	0.00265547
fraction	K03231	TC.OOP; OmpA-OmpF porin, OOP family	0.0189205	0.00790851	0.220336	0.00224597	0.683618	0.0385981	0.0319951	0.023644	0.0056322	0.042133	0.0287709	0.0691655	0.0196162	0.00906732	0.00468566	0.00339006	0.0825111	0.00968072	0.220929	0.0101769	0.051199	0.0348624	0.0365167	0.0945279	0.0715096	0.0628138	0.0791401	0.0429956	0.0747268	0.0203429	0.0497768	0.0959478	0.0803772	0.134872	0.545955	0.0974354	0.263428	0.216608	0.170355	0.0994888	0.120819	0.16723	0.0342642	0.0261499	0.0142009	0.264776	0.0243987
fraction	K03270	TC.GNTP; gluconate:H+ symporter, GntP family	0.019201	0.0185277	0.0304268		0.00608361		0.0154911	0.00666038	0.000881448	0.0384267	0.0192805	0.0174377	0.00261653	0.0664674	0.00857246	0.00032714	0.00158068	0.0140469	0.0117694	0.0187774		0.00183831	0.00156567																		5.18196e-05
fraction	K03274	TC.SSS; solute:Na+ symporter, SSS family																					0.00512679	0.0184784	0.0166181	0.000907137	0.000393351	0.00153011	0.00212385	0.00027606	0.00143441	0.000818813	1.71913e-05	2.6506e-05	0.00144272		0.000176506	0.00151927	0.000705635	0.000169091	0.000253115	0.00100059	0.000971368	0.00628348		3.84783e-05		9.49393e-05
fraction	K03282	TC.AGCS; alanine or glycine:cation symporter, AGCS family	1.70171e-05	0.00125953	0.0274477				0.000569197		1.78317e-06									1.82155e-06	3.81106e-05		0.00125329	0.002111	0.000787153	0.00875584	0.00168773	0.00339575	0.00364066	0.00123942	0.000494044	0.000210294	0.00810973	0.00151957	0.00141823	0.00301685	0.00292286	0.00049665	0.0031463	0.00273482	0.000242996	0.00300892	0.00980106	0.00136731
fraction	K03283	nhaB; Na+:H+ antiporter, NhaB family	0.209348	0.0785493	0.817222	7.0677e-05	0.919259	0.0054283	0.126935	0.0160923	0.00274891	0.0948178	0.0164482	0.0507413	0.00221016	0.156187	0.0221266	0.00167183	0.00287388	0.326096	0.00982741	0.0432973	0.503958	0.0359411	0.0162143	0.0149627	0.0131625	0.0133945	0.0809232	0.0203253	0.0483661	0.0104251	0.0410802	0.0291279	0.0488746	0.42563	0.166474	0.125249	0.0216683	0.01704	0.0129825	0.0377511	0.0240098	0.0365532	0.131117	0.956558	0.35421	0.151203	0.403971
fraction	K03285	amt, AMT, MEP; ammonium transporter, Amt family	0.000471875	0.00522876	0.00163761		0.000809378	0.000465108	0.00303636	0.000132143	3.36488e-05	0.00337452	0.000215912	0.00015991	7.78263e-06	0.000131881	3.944e-05	0.000888532	0.00046403	0.000171494	0.000896454	0.000488443	0.206747	0.148905	0.0719472	0.0774914	0.150259	0.150159	0.0487069	0.00725208	0.0102197	0.0371929	0.0207764	0.00998568	0.00820389	0.0106257	0.0100483	0.0837297	0.027334	0.0437845	0.0140867	0.00996338	0.0113388	0.415385	3.16513e-05	0.000798788	0.000122287
fraction	K03286	butA, budC; meso-butanediol dehydrogenase / (S,S)-butanediol dehydrogenase / diacetyl reductase [EC:1.1.1.- 1.1.1.76 1.1.1.304]	0.850307	0.105612	0.139582	0.783808	0.395008	1.25245	0.640672	2.62302	0.34275	1.20481	0.772578	0.183578	1.22502	0.820518	0.163716	0.150912	0.180228	1.11851	0.755917	0.715842	0.804127	0.803402	0.683958	0.214471	0.887958	0.711838	0.0990983	0.302279	0.684835	0.0545726	0.125813	0.270142	0.225001	0.0798223	0.0879704	0.117118	0.0834496	0.0557395	0.167098	0.302364	0.220236	0.308679	0.0543703	0.572669	0.345335	0.281946	0.0584952
fraction	K03299	catA; catechol 1,2-dioxygenase [EC:1.13.11.1]																						1.75372e-05	6.36946e-05	0.000157199	0.000218631	0.000213482	0.00109833		0.00145706	0.0058407			0.000223126			2.98463e-05					0.000597693	0.000274011	0.00716539	0.0106931	0.0147133	0.000696421	0.0060576
fraction	K03307	chlH, bchH; magnesium chelatase subunit H [EC:6.6.1.1]	0.109036	0.0326193	0.076981				0.00453074	0.00608354	1.4613e-05	0.019348		0.00159795	0.00972165	0.000399492	4.08128e-05	0.000956184	4.47473e-05	0.0163012	0.00328585	0.000294393	0.000318461	0.00415457	0.00508791	0.0315292	0.00682164	0.00382204	0.00126893	0.0134607	0.0106261	0.00235559	0.007762	0.0299604	0.00826001	0.00491449	0.00227037	0.00610834	0.0079844	0.00883185	0.0108511	0.0127778	0.00255573	0.000370974	1.35773e-05	0.000997253	6.76607e-05	0.000351103	0.000196301
fraction	K03310	mcp; methyl-accepting chemotaxis protein	0.441664	0.569203	0.116118	0.0859066	0.0835785	0.115923	0.0325463	0.277931	0.0148737	0.642943	0.118501	0.0444697	0.168588	0.297221	0.0105588	0.345076	0.00691721	0.139389	0.0894327	0.208103	0.000100287	0.00381318	0.00743692	0.00298947	0.000377297	0.00137218	0.000973047	0.00629564	0.0166292	0.000723335	0.000418776	0.106764	0.00040325	0.00552462	0.00675329	0.00240499	0.00402963	0.00252755	0.00612781	0.00862529	0.00547373	0.00492398
fraction	K03314	cheA; two-component system, chemotaxis family, sensor kinase CheA [EC:2.7.13.3]	0.0287453	0.0205746	0.00646944				0.00842837	0.0165241	4.40169e-05	0.0118278	0.0010131	0.00147762	0.000403144	0.000706724	0.00525719	7.34287e-05		0.00152471	0.00150299	0.000755425	9.571e-05		8.94229e-05					0.000574514	0.00120846				0.0017964	6.55578e-05		2.70749e-05	0.000325022	8.48199e-05	0.000309237	0.000273728
fraction	K03320	cheX; chemotaxis protein CheX	0.000397943	0.00768616	0.0298252	0.000253478	0.0008982		0.0040351	0.00735329	0.000109894	0.000515127		0.00121243	0.200151	0.000469772	0.00314212	0.000330212		0.000102859	0.00252059	0.00248896	0.105006	0.0364125	0.0468219	0.327699	0.168384	0.125845	0.291558	0.170076	0.100372	0.0288539	0.175078	0.0722543	0.133721	0.357611	0.00411124	0.0465165	0.158782	0.173969	0.134497	0.157395	0.16145	0.502481	0.0121891	0.0088281	0.0110285	0.317789	0.0446691
fraction	K03366	cheY; two-component system, chemotaxis family, chemotaxis protein CheY		0.00166405	0.00191189	1.65739e-05	0.00131186	4.63085e-05	0.00061653	0.00283568	1.70923e-06		0.000460518		2.04391e-05	0.00021286	3.25301e-05	1.29071e-05		0.000853252	0.00258211	0.000134782		0.00449586	0.00579105																				1.02874e-05	0.00385417	0.00325296	0.000463093
fraction	K03381	cheZ; chemotaxis protein CheZ		0.000332849	5.33417e-05	0.000503163	0.000837852	0.000829463	0.0019006	0.00235325	7.0485e-05	0.00171227	0.000729272	0.000137262	0.00755073	0.000181676	0.00225289	2.94144e-05	0.000877449	0.000510511	0.00875253	0.00575931	0.000192221	0.00220599	0.000723022				1.50936e-05		4.62436e-05							1.47706e-05		5.39935e-05			0.000794468	0.00018802	0.000121761	0.00407335	0.000758339
fraction	K03403	cheV; two-component system, chemotaxis family, chemotaxis protein CheV								7.66781e-05						5.13804e-05			1.41515e-05	0.000836329																									0.000909362	0.000124517		0.000821452	0.0033791
fraction	K03406	E2.1.3.1-5S; methylmalonyl-CoA carboxyltransferase 5S subunit [EC:2.1.3.1]	0.24342	0.197965	0.0703946	0.0695728	0.0403489	0.0947642	0.0719464	0.0668683	0.184506	0.0568404	0.125862	0.110539	0.0538361	0.0458411	0.0455418	0.00549855	0.0241559	0.0629726	0.095976	0.0652144	0.0373134	0.0643293	0.0722314	0.0968251	0.22059	0.146087	0.0373771	0.261754	0.254371	0.0128342	0.0849055	0.185563	0.220478	0.131182	0.147442	0.0240391	0.044208	0.0441858	0.12869	0.332368	0.0459494	0.106378	0.00483542	0.154769	0.0190113	0.00781476	0.00434831
fraction	K03407	prpB; methylisocitrate lyase [EC:4.1.3.30]	0.0252805	0.0837123	0.0226884	0.0298907	0.053399	0.0183652	0.037318	0.0907867	0.0015676	0.197163	0.0371824	0.0538465	0.024546	0.0342225	0.00857486	0.0048297	0.0509499	0.0247337	0.0335903	0.0308157	0.123408	0.0376888	0.0393954	0.00311104	0.0045117	0.00163739	0.00415315	0.0434101	0.0268942	0.000950881	0.00955847	0.0869402	0.123908	0.105815	0.0256612	0.00717543	0.00621807	0.00878191	0.0179417	0.0529748	0.00869873	0.0105936	0.000118753	0.010964	2.74999e-05	0.000217889
fraction	K03409	tatD; TatD DNase family protein [EC:3.1.21.-]		0.000960056			0.000202941		0.000165114		2.17436e-05				8.10661e-05					0.000116432	0.000139547	0.000378974		0.000488541	0.00124409		0.000888376	0.00084402		0.00101408	0.000761338		0.000290036	0.00216817	0.00185187		0.000208762				0.00171581	0.000821996			3.73005e-05	0.00103554		0.000802989
fraction	K03413	psmA, prcA; proteasome alpha subunit [EC:3.4.25.1]	0.00294441	0.0234695	0.00916792		0.00322799		0.0241975	0.00899385	0.0022017	0.00509711	0.00461067	0.00211885	0.0156088	0.00317559	0.0320291	0.00204399	0.00158912	0.00620315	0.0423123	0.0646596	0.0130637	0.00476236	0.00763366	0.0714917	0.151147	0.0951959	0.0324782	0.103287	0.0897413	0.0449182	0.00710295	0.0193719	0.240367	0.0275513	0.0769451	0.00238926	0.0291753	0.024016	0.0531432	0.101786	0.00487256	0.0245081	0.00207071	0.025191	0.00139725	0.00873657	0.00491318
fraction	K03414	mraW, rsmH; 16S rRNA (cytosine1402-N4)-methyltransferase [EC:2.1.1.199]																					0.000157607	0.000105762										0.00155913								4.13297e-05			0.00224267	0.00170046	0.103171	0.026323	0.0281241
fraction	K03415	trmB, METTL1, TRM8; tRNA (guanine-N7-)-methyltransferase [EC:2.1.1.33]	0.125057	0.192578	0.0715827	0.00575973	0.0149913	0.00527978	0.0604877	0.00624922	0.00351456	0.0167584	0.0486483	0.0477978	0.0129859	0.00859485	0.0254076	0.000726622	0.00455852	0.0062138	0.071085	0.0789322	0.0302413	0.163246	0.0652008	0.0116947	0.0104789	0.00145666	0.00204381	0.0414894	0.0391301	0.00866316	0.0110966	0.0384287	0.272041	0.0285615	0.039698	0.01125	0.0165296	0.0123542	0.0459077	0.0524563	0.0663997	0.070469		0.00813651	0.00106708
fraction	K03416	mscS; small conductance mechanosensitive channel	0.000282064	0.000592114					0.00495367	0.000850063	0.000230192	0.00021558	0.00194259	0.000562033		0.000388437	0.00870269	7.02369e-05		0.000645238	0.00325127	0.000121406	0.000265043	6.98964e-05	3.91812e-05	0.000378807		6.5212e-05	1.54157e-05	4.86331e-05	0.000127726	9.66061e-05	0.000200842	6.41285e-05	8.74134e-05	0.000653933	2.44061e-05	5.58886e-05	0.00217259	0.0015712	0.000353368	0.0013325	0.000152247	0.000569102
fraction	K03417	TC.NCS1; nucleobase:cation symporter-1, NCS1 family	0.00130577	0.0122828	0.00194996	0.00181735	0.00339868	0.00308471	0.0245519	0.00451317	0.00227617	0.00871712	0.00880972	0.0210178	0.0195948	0.00680246	0.0176266	9.34705e-05	0.00119494	0.00241718	0.0445704	0.0463921	0.00232863	0.0203099	0.0226732	0.00144533	0.00204545	0.00101094	0.00170144	0.000530841	0.00299048	0.000284601	0.000499555	0.024748	0.000175303	0.011182	0.00223153	0.00127247	0.00175395	0.000788577	0.00100185	0.000956544	0.00100585	1.84561e-05	0.000682937	0.00545593	6.02033e-05	0.00104271
fraction	K03424	rnhA, RNASEH1; ribonuclease HI [EC:3.1.26.4]	0.0229955	0.0180346	0.0084236	0.000308206	0.000400209	0.000319946	0.00128461	0.000929655	0.000154091	0.0093524	0.000709187	0.00434889	0.00592239	0.00124455	0.000353239	0.00137387	0.00325482	0.00139162	0.00292289	0.00773779		4.73671e-05					1.34245e-06	0.000203954	0.000130355										9.41598e-05
fraction	K03432	parB, spo0J; ParB family transcriptional regulator, chromosome partitioning protein																					0.00183853	0.0020944	0.00412884	0.00453634	0.00548666	0.00248724	0.0197486	0.00417605	0.00261053	0.00171422	0.00181275	0.00949387	0.0126915	0.0220491	0.00112789	0.00511312	0.0144804	0.0172824	0.00908663	0.00239225	0.036189	0.0871306	0.000541388	0.000461264
fraction	K03438	coxM, cutM; aerobic carbon-monoxide dehydrogenase medium subunit [EC:1.2.5.3]	0.219296	0.320235	0.136002		0.00827767		0.093803	0.0798502	0.00239264	0.00507352	0.000326444	9.98547e-05	0.00788979		0.0147148	1.95013e-05	0.000115215	0.0443351	0.116204	0.139285			0.000968344							8.7151e-06							0.000170359	0.000163988			5.65172e-06	1.17352e-05
fraction	K03439	coxL, cutL; aerobic carbon-monoxide dehydrogenase large subunit [EC:1.2.5.3]	0.0231594	0.0270765	0.0182205	0.000219736	0.00301321	2.53929e-05	0.00347654	0.0219182	0.000444641	0.0230469	0.00376744	0.0149857	0.00189187	0.00198001	0.0031897	3.05551e-05		0.000779482	0.00582159	0.00664685		0.000281572	0.00053664		0.000632349			0.00144676	0.00173364		0.000684005		0.000229768	0.0019814	0.00316101		0.00084043	0.000342641	0.00168084	0.00191084	0.000580012
fraction	K03442	fixA, etfB; electron transfer flavoprotein beta subunit	0.596081	0.482622	0.171611	0.0125069	0.0637027	0.0403291	0.11528	0.194681	0.0213336	0.459814	0.287825	0.146583	0.136679	0.252406	0.123936	0.0133703	0.034953	0.228137	0.128394	0.0685565	0.00502279	0.0110422	0.0193817	0.0137466	0.00643201	0.00563399	0.02441	0.0325291	0.0831076	0.00190764	0.0168418	0.0223214	0.0149087	0.0110348	0.0099712	0.0345614	0.0100438	0.00749243	0.0329932	0.0378537	0.00547349	0.00332125	0.00115672	0.00659176	0.00876691	0.00408317	0.00387187
fraction	K03457	fixB, etfA; electron transfer flavoprotein alpha subunit	1.21383	0.294238	0.280327				0.0141833	0.118409	2.3919e-05		0.0730487	0.00995761	0.0349719	1.16574		0.00371583		0.256603			0.0329168	0.00197603	0.000673295	0.00497669	0.0117366	0.00243366		0.00595889	0.00673769	0.000160705	0.0029252	0.0042571	0.00556908		0.0211498		0.00917969	0.0229005	0.0050513	0.00924936
fraction	K03469	birA; BirA family transcriptional regulator, biotin operon repressor / biotin---[acetyl-CoA-carboxylase] ligase [EC:6.3.4.15]	3.91426e-05	0.0149154		5.634e-05					2.79522e-06		0.000131814		3.2094e-05		0.000135656																												0.000291409	0.00152977			0.00108736
fraction	K03497	smc; chromosome segregation protein	0.00870934	0.0180357	0.00221639	0.00087058	0.000346647	0.000254373	0.0429172	0.00660701	0.00277318	0.000700653	0.000694157	0.00251499	0.00110217	0.00155077	0.0420957	0.000282466	0.00078573	0.00217259	0.0658157	0.0604975								0.000252781	9.91673e-05						0.000150307				0.000128319	0.000213199
fraction	K03519	ftsZ; cell division protein FtsZ	0.01784	0.0076084	0.00606195		0.000368242		0.0100986	0.00315872	8.9126e-06	0.0242993	0.092767	0.0558239	0.00200721		0.0010884			0.00239924	0.00411423	0.00334661	0.037393	0.0213048	0.0222238	0.135272	0.0893495	0.0521718	0.0246075	0.0401661	0.0674637	0.0130654	0.00975	0.0270655	0.0137955	0.0490469	0.00520567	0.00912031	0.118176	0.0448633	0.0584625	0.0822972	0.0435663	0.057541
fraction	K03520	clpX, CLPX; ATP-dependent Clp protease ATP-binding subunit ClpX	0.000256542	0.000116428	0.000307032		0.000706942	6.08427e-05	0.000814028	0.00309809	2.9266e-05	0.00987477	0.000271645	0.0224194	0.000815041	0.000195418	3.94589e-05	3.6989e-05	0.00109873	5.97139e-05	0.000845825	0.000542537	0.418855	0.100661	0.170652	0.341758	0.252917	0.21138	0.368545	0.0650082	0.0546504	0.0724895	0.0763366	0.50519	1.24976	0.0709688	0.0539159	3.25559	0.264941	0.160128	0.0647809	0.0774524	1.6133	0.21327	0.00072664	0.00155737		4.41633e-05	2.6684e-05
fraction	K03521	recA; recombination protein RecA	0.0049971	0.0414348	0.0237537	0.0778602	0.109535	0.102254	0.11759	0.204433	0.355814	0.0863089	0.0622698	0.0443485	0.185424	0.0352959	0.06012	0.0258261	0.0533242	0.0476237	0.0905506	0.281134	0.195956	0.427653	0.459219	0.0209152	0.0422963	0.0398773	0.0378452	0.0365101	0.0618782	0.00773604	0.0499075	0.0815369	0.154426	0.0571696	0.0514819	0.0137731	0.0265928	0.023296	0.0466085	0.0716884	0.0368709	0.0501543	0.00818222	0.100813	0.043859	0.00437801	0.00141064
fraction	K03522	rdgC; recombination associated protein RdgC	0.00744027	0.00570742	0.000873714	0.00832991	0.00745991	0.0178568	0.00716703	0.243404	0.000277517	0.0074868	0.318812	0.00337809	0.00131594	0.0044569	0.00713085	0.000503812	0.00186722	0.0633939	0.00653487	0.00993252	0.0553181	0.0962816	0.113561	0.0719841	0.212409	0.0719365	2.50959	0.0642412	0.064007	1.38077	0.0325966	0.254854	0.0389174	0.15025	0.0568379	0.124914	0.187987	0.123228	0.0672339	0.0475167	0.211247	0.069085	0.857652	0.406844	0.237889	0.0154911	0.0742217
fraction	K03524	exbD; biopolymer transport protein ExbD	0.00595088	0.0127524	0.00628038		0.00441747	0.00417573	0.0301255	0.00484276	0.000434281	0.00269803	0.0053679	0.00316309	0.0163156	0.00244075	0.0042618	0.000150621	0.00857203	0.000942799	0.00410234	0.0122298		0.00271369		0.00128028				0.00070408			0.000411673			0.00111958	0.000393061		0.0012079		0.0006526	0.000440956
fraction	K03529	exbB; biopolymer transport protein ExbB	0.00812502	0.0123415	0.0100942		0.0188806	0.00464015	0.00228311	0.00564761	1.00794e-05	0.00228634	0.00323311	0.0267463	0.00123203	0.0443072	0.00313502	0.000635703		0.0157297	0.00316751	0.00120997	0.000197149	0.00319137	0.00364778	5.73147e-05	5.2388e-05	1.55688e-05	4.70086e-05	1.18854e-05	5.26342e-05	2.62853e-05			6.29206e-05	6.45365e-05	2.89977e-06		0.000745417	0.00102609	0.000131304	0.00203971	1.35347e-05	3.79496e-06			5.33429e-05
fraction	K03531	tolQ; biopolymer transport protein TolQ	0.0160538	0.0108634	0.0082364	0.00416434	0.00144263	0.00054064	0.0348413	0.161333	0.0557551	0.0113617	0.00255957	0.00903293	0.000183911	0.00331782	0.292711	0.000981378	0.00921492	0.0611596	0.0330344	0.0140071	0.00367971	0.0609933	0.0557189	0.0198618	0.0174722	0.0250857	0.0904824	0.0280284	0.0588847	0.0209889	0.0450676	0.0192892	0.0294043	0.0263332	0.334163	0.13367	0.0356343	0.0286083	0.0217592	0.0295803	0.129589	0.259763	0.00767655	0.0202423	0.0186341	0.017121	0.00597244
fraction	K03544	csrA; carbon storage regulator	0.0029792	0.0172427	0.017111	0.000383799	0.00269371		0.00670364	0.0312065	0.000171078	0.00119182	0.0110505	0.0179859	0.00203458	0.00691795	0.0011127	0.000571113	0.000197759	0.0225425	0.00332754	0.00346673	0.017576	0.0656116	0.0998327	0.115256	0.36001	0.344247	0.0490644	0.16983	0.136907	0.225756	0.204978	0.00650118	0.0133976	0.0254659	0.0430482	0.035525	0.0781451	0.223628	0.118357	0.128316	0.102753	0.0244145	1.72616e-05	0.173479	0.0217761	0.285015	0.0234066
fraction	K03553	BCP, PRXQ, DOT5; thioredoxin-dependent peroxiredoxin [EC:1.11.1.24]	0.269257	0.200013	0.117493	0.00685282	0.041666	0.0396869	0.0661127	0.0420242	0.281889	0.067	0.0404118	0.0887717	0.0986049	0.0161278	0.0101744	0.00643532	0.0187381	0.0420746	0.0822376	0.136688	0.0270295	0.121916	0.121498	0.0190691	0.0110084	0.0107006	0.0397845	0.114942	0.252593	0.0190059	0.0310099	0.0758966	1.04683	0.019879	0.175689	0.0715539	0.0530409	0.0501361	0.0813429	0.143611	0.13123	0.0872776	0.000794532	0.0119082	0.00800444	0.00525996	0.0257911
fraction	K03554	tldD; TldD protein	0.00630288	0.0151354	0.00418697		0.0120477		0.00270474	0.00234638	0.000178241	0.00196773	0.00257035	0.00170104	0.00707041	0.00336855	0.00262646	0.000612955	0.0189435	0.000549413	0.00470598	0.01038			0.00041056					0.0009485	0.00311415				0.00193807		0.00100061				0.00117136	0.00115333
fraction	K03559	mreB; rod shape-determining protein MreB and related proteins	0.0281954	0.197641	0.236894	0.0151729	0.0542279	8.5916e-05	0.148684	0.0232243	0.167859	0.0143433	0.0362979	0.0178109	0.588133	0.0289692	0.0169531	0.0180969	0.0884931	0.0287069	0.0976544	0.102868	0.0268065	0.0538379	0.0207026	0.00525656	0.00380197	0.000363829	0.01507	0.0592565	0.173335	0.0138481	0.00168103	0.0198962	0.0320344	0.0185369	0.0651684	0.0238853	0.0173286	0.0135646	0.0449995	0.089033	0.0101119	0.0081277	0.00692568	0.0569123	0.0155712	0.000820915	0.0225006
fraction	K03561	mreC; rod shape-determining protein MreC	1.48946	0.72096	0.990154	0.0382681	0.160223	0.304472	0.334986	0.121182	0.119667	0.257352	0.782557	0.444336	0.593044	0.638762	0.238425	0.0220491	0.0656792	0.393738	0.445967	0.37861	0.059337	0.251308	0.185397	0.240252	0.0490493	0.168724	0.0689834	0.455388	0.671524	0.0394153	0.126917	0.448987	0.202162	0.176576	0.283209	0.0748235	0.119359	0.0707074	0.292106	0.512342	0.0390991	0.0729158	0.0164351	0.179443	0.138042	0.00431959	0.0506132
fraction	K03562	hepA; ATP-dependent helicase HepA [EC:5.6.2.-]	0.146767	0.0348017	0.0453258	0.00034895	0.00481219	0.0385127	0.00868663	0.0127419	0.208744	0.106447	0.00950594	0.0283001	0.0445253	0.0092991	0.009444	0.00648638	0.00418191	0.00228056	0.00398778	0.00332842	0.00104702	0.000793534	0.00137896	0.00354947	0.00694403	0.00107457	0.00425062	0.00724842	0.0090459	0.00513213	0.0057184	0.00315038	0.01072	0.00188847	0.00383144	0.00345286	0.00175626	0.00221124	0.00514911	0.00758294	0.00264179	0.00239814	0.000722783	0.000166186	5.89793e-05	0.000378979
fraction	K03563	recD; exodeoxyribonuclease V alpha subunit [EC:3.1.11.5]	0.165544	0.40609	0.0754519	0.00448588	0.197007	0.0228044	0.0455425	0.128647	0.00106883	0.0762693	0.00207057	0.000970145	0.00485193	0.0197459	0.0339982	0.0024089	0.046749		0.0255311	0.0754354		0.0138683	0.0338417				0.000539866		0.000892086	0.000392203							0.000278451				0.0368453		0.000585271	0.174572	0.0361398
fraction	K03564	acrA, mexA, adeI, smeD, mtrC, cmeA; membrane fusion protein, multidrug efflux system	0.000489539	0.0124053	0.0189562		0.0689219		0.0286712	0.00310578	0.00650526	0.00712291		0.00873108	0.00398966	0.00153432	0.032838	0.0214496		0.00181429	0.0558298	0.131392							0.00606803	0.0169116	0.015023	0.00576605	0.0295687				0.0185094		0.00159862	0.000980016	0.0207405	0.0222929	0.00163791		0.000176294	0.0039277	0.00182419	0.00221047	0.000473343
fraction	K03568	ftsA; cell division protein FtsA	0.00148046	0.00783931	0.000803763	0.000150246	0.000129778		0.00082508	0.000165204	7.27819e-05	0.00178509	1.85802e-05	1.66473e-05			0.000585468			1.68145e-05	0.000431189	0.00136769	0.0316129	0.00960513	0.00712532	0.00210703	2.4639e-05	0.00184455	0.000549184	0.004383	0.00467452	0.000160331	7.55005e-05	0.000677823	0.0174749	0.00327068	0.0018174	0.000853235	0.00110618	0.00121956	0.001856	0.00843634	0.000455338	0.00524389	0.000552973	0.00022133	0.0041079		3.20555e-05
fraction	K03569	mrp, NUBPL; ATP-binding protein involved in chromosome partitioning	0.0494744	0.0433243	0.0505866	0.000599841	0.0271849	0.00182457	0.0421339	0.0621734	0.00233822	0.0127359	0.012589	0.0766342	0.0101199	0.0129954	0.0354219	0.0132454	0.00156476	0.00793091	0.0223815	0.0217082	0.0497851	0.159701	0.232927	0.131492	0.217147	0.0840253	0.0267193	0.00900208	0.0315888	0.00263279	0.0133306	0.0068971	0.0224806	0.0304969	0.0236079	0.0269453	0.046868	0.0243347	0.0125603	0.00837525	0.0461566	0.0629319	0.0243059	0.0718098	0.0725156	0.046569	0.0170373
fraction	K03570	bfr; bacterioferritin [EC:1.16.3.1]	0.00238749	0.00799343	0.0012425	0.0010258	0.00305922	0.022841	0.00161515	0.0727053	0.000152082	0.0018455	0.000632316	0.00712006	0.0263763	0.0107063	0.0010577	0.000100128	0.000747726	0.00563173	0.00128131	0.00433304	0.000166595	0.00054994	0.00105015	0.00103615	0.0015222	0.000104522	0.00024479	0.000110357	9.95981e-05	5.77606e-06		0.000659164	0.000288744	0.000499272			0.000947166	0.00615636	0.000174987	0.000120408	0.000354466	0.00077195	9.22074e-05	6.06535e-05
fraction	K03580	era, ERAL1; GTPase	0.000841817	0.00914996	0.00642547		0.000573925	8.20374e-05	0.0045839	0.00904306	0.000923382	0.00365937	0.00962507	0.0114635	0.00664984	0.00870883	0.00284011	0.00150794	0.0129422	0.008946	0.00666972	0.00333891	0.000163205	0.00314394	0.000529995		1.76845e-05	5.40303e-05	1.69296e-05	4.94607e-05	8.18781e-06			7.61062e-05	0.000312145	3.48891e-05	0.000235321		1.10338e-05	5.16657e-06	6.34115e-05	0.000149513	1.86295e-06	0.000407591	0.00619105	0.0253861		0.124791
fraction	K03581	lepA; GTP-binding protein LepA	3.44196e-06	0.000385435						6.91396e-05	3.87832e-05	8.93391e-05			9.37965e-05		0.000275968			0.000104267	1.44945e-06	5.79358e-06	7.72973e-05	0.00185536	0.000708344				0.0037511	4.75091e-05		0.0290157		0.000169027	0.00128192	0.000907875	2.89637e-06	0.00188413		2.03158e-05	0.000407989		0.00184542	0.00287195
fraction	K03585	sspA, mglA; stringent starvation protein A	0.00811632	0.00816458	0.0270403	0.644918	0.00800221	0.00501762	0.011196	0.0355432	0.00760188	0.0109741	0.00733071	0.0440529	0.119081	0.0718304	0.0123616	0.0833052	0.0304768	0.0932672	0.00520058	0.0101692	0.0171972	0.0198373	0.0196256	0.0017964	0.00199639	0.00191636	0.0115091	0.00204267	0.00283825	0.0047172	0.00444478	0.00312226	0.00758346	0.00356143	0.00233804	0.0330626	0.00156562	0.00100505	0.00160925	0.000755915	0.00627733	0.0258783	0.00238835	0.00609865	1.23808e-05	0.000157685	6.02607e-05
fraction	K03590	fadR; GntR family transcriptional regulator, negative regulator for fad regulon and positive regulator of fabA	0.0113351	0.0292787	0.0228017		0.00185225	0.000778333	0.0207365	0.00721083	0.0940504	0.0145737	0.0219886	0.0114832	0.000309509	0.00449855	0.00942564	0.000880956		0.0139153	0.0217813	0.0197585	0.000763077	0.0382906	0.0700007	0.0103952	0.00295794	0.00742035	0.0136722	0.00799374	0.0108346	0.00253083	0.0108935	0.0221733	0.0118736	0.018454	0.00545731	0.0036557	0.0146628	0.00705639	0.00679685	0.0209606	0.0203731	0.0421142	0.000102577	0.00351401	0.000346856
fraction	K03593	rnfD; H+/Na+-translocating ferredoxin:NAD+ oxidoreductase subunit D [EC:7.1.1.11 7.2.1.2]		3.85424e-05	0.000136923				0.000748036		1.11518e-05						5.67807e-05				0.000239383	0.000801302	0.00465759	0.00182984	0.00163609	0.00882403	0.000263461	9.16731e-05	0.00924478	0.00152885	0.00203777	0.00106345	0.000568367	0.000623231	0.000782247		0.000727443	0.00516039	0.0157041	0.00928093	0.0039063	0.00276531	0.0129009	0.0109659	1.36912e-05	4.35931e-05	0.000216716	0.000338669
fraction	K03594	plsX; phosphate acyltransferase [EC:2.3.1.274]	0.16643	0.266407	0.199373	0.197932	0.0623189	0.0275073	0.101662	0.170483	0.0340397	0.235314	1.00668	0.399726	0.171354	0.246559	0.198343	0.0833825	0.0825321	0.976983	0.199795	0.101127	0.442205	0.108964	0.124075	0.316859	0.240726	0.154662	0.023227	0.0657855	0.194874	0.000893732	0.0777599	1.19272	0.0025077	0.0107441	0.0511431	0.015479	0.350911	0.308554	0.0393694	0.102397	0.0250442	0.0137443	0.0187492	0.524734	0.635663	0.017286	0.0428036
fraction	K03595	greA; transcription elongation factor GreA	0.00751262	0.0165354	0.00845968	0.0421781	0.0138049	0.0646147	0.00916771	0.000171674	9.42078e-05	0.00447889	0.00635802	0.0016607		0.00140822	0.00538182	0.000251444	0.000803175	1.57831e-05	0.00655929	0.00538335	0.00252417	0.00173701	0.00247773	0.00108399	9.48745e-05	0.000103646		0.000521839	0.000476879	0.000130091	2.01259e-05	0.00115332	0.00576162	0.00166089	0.00253304	8.56866e-05	0.00253096	0.00207483	0.00116845	0.0010771	0.000321726	0.00157327
fraction	K03596	EGD2, NACA; nascent polypeptide-associated complex subunit alpha	0.00477868	0.00822083	0.0216865	0.00032258	0.0231588	0.00396916	0.0144165	0.028139	0.0126317	0.000501922	0.0155185	0.00904727	0.0556083	0.599714	0.014226	0.000994582	0.0195984	0.0453488	0.0133791	0.00730048	0.0015733	0.0137738	0.0140715	0.00169412	0.000504642	0.00195054	9.4636e-05	0.000836207	0.00321895	0.00448464	0.00109678	0.000517862	0.00352399		0.00250582	0.000309461	0.00207273	0.0085862	0.00527252	0.00188815	0.0176472	0.00170689	0.694736	0.0736044	0.0841179	0.0682224	0.000118023
fraction	K03599	moaB; molybdopterin adenylyltransferase [EC:2.7.7.75]	0.0374989	0.0586383	0.0175885	0.000240978	0.0139493	0.000387521	0.0253456	0.00813993	0.0619939	0.0146378	0.0125366	0.0438196	0.000325873	0.00814361	0.101325	0.0011012	0.00198281	0.00413094	0.0524808	0.0558498	0.012471	0.0747209	0.0698989	0.00706417	0.00152328	0.00267735	0.00324157	0.00833904	0.0146751	0.00163643	0.00508663	0.0602811	0.0573866	0.0893389	0.0137705	0.00419299	0.00726903	0.0056038	0.0136986	0.0116808	0.011221	0.0189848	0.000813089	0.00368088	0.0206695
fraction	K03603	pal; peptidoglycan-associated lipoprotein	0.128744	0.274155	0.145082	0.0287814	0.0159677		0.241942	0.984249	0.0300669	0.0326477	0.17423	0.0824431	0.0181787	0.0316069	0.169471	0.00189807	0.00344881	1.0831	0.532421	0.485829		0.0145873	0.00473153	0.00186315	0.000570725	0.000195412	0.00153048	0.00797137	0.00835198	0.00196176	0.00413467	0.0122425	0.0019419	0.0112924	0.00703838	0.00978953	0.0011158	0.00279026	0.0069192	0.0135894	0.0225823	0.00383802		0.00922995	0.000499506
fraction	K03614	tolB; TolB protein	0.493337	0.820151	1.92735	0.00130996		0.0448606	0.0618893	1.69322	0.0013468		0.0266876	0.0715794	0.10881		0.00133075	0.000471132	0.00575834	0.249626	0.0416509	0.00552715										0.000725764	8.88007e-05		0.00211544	0.00968636									5.8774e-05
fraction	K03621	lipA, LIAS, LIP1, LIP5; lipoyl synthase [EC:2.8.1.8]	0.00320267	0.000764938	0.00745012		8.55337e-05	0.0113567	0.0132123	0.00741089	6.06973e-05	0.00069882	0.018893	0.00911245	0.0203941	0.00615949	0.0078207	0.000514758	0.00163742	0.00336557	0.000459959	0.00438488		0.000125978	0.000156634				1.33685e-05				0.000400949	3.76465e-05	0.000562957		0.00121456	8.99671e-05	0.000115146	2.0113e-05	0.000156696	7.73447e-05			2.94577e-06	5.02431e-06	7.26651e-05	0.000231535	3.34467e-05
fraction	K03624	seqA; negative modulator of initiation of replication	0.0199025	0.0212794	0.00250004	0.000610862	0.00411728	0.000261711	0.0447336	0.000748585	0.0060125	0.0227431	0.00402461	0.00309435	0.00106048	0.00826037	0.0231359	0.000416844	0.000277557	0.00457927	0.0328429	0.0709933	0.000166674	0.00517735	0.000280529	0.00256153	0.00042922	0.00116428	0.00141108	0.00868022	0.0197186	0.000462504	0.00204442	0.000227088	5.15133e-05	0.000168105	0.00250092	0.000179346	0.00330893	0.000820599	0.00346813	0.00771579	0.000863656	0.000804065		0.00310587	6.18485e-05
fraction	K03626	mnmE, trmE, MSS1; tRNA modification GTPase [EC:3.6.-.-]																						0.000130894	0.000124833							1.08822e-05					0.000161579										5.37455e-05	0.000216635	0.00160728
fraction	K03638	recQ; ATP-dependent DNA helicase RecQ [EC:5.6.2.4]	0.0392486	0.0813576	0.0334699	0.182036	0.226519	0.0753005	0.0446067	0.0399911	0.0861763	0.08677	0.0214679	0.0291017	0.0353055	0.107367	0.0403198	0.00955181	1.63398	0.0629903	0.0194316	0.0534593	0.000399365	0.00981517	0.0107496	0.00251071	0.00264468	0.00794781	0.000721515	0.00569847	0.00245696	0.0183543	0.000188426	0.000164296	0.00451509		5.88036e-05	0.00689325	0.00202483	0.0011462	0.00759196	0.000890495	0.0034999	0.00100116		0.00388601	0.00774921
fraction	K03640	uvrD, pcrA; ATP-dependent DNA helicase UvrD/PcrA [EC:5.6.2.4]	0.405602	0.246464	0.132996	0.121127	0.0399192	0.0158782	0.286463	1.1522	0.204458	0.724628	0.165164	0.215146	0.224225	0.647806	0.109659	0.00573987	0.172863	0.661291	0.495353	0.20885	0.850453	1.40875	1.72064	0.322156	0.0699105	0.116154	0.185341	0.172267	0.248897	0.0312807	0.113846	0.377691	0.286471	0.157319	0.139449	0.0725963	0.274295	0.219984	0.181986	0.206296	0.19399	0.138866	0.0171849	0.146405	0.10554	0.0655693	0.0214614
fraction	K03641	ATPeVS1, ATP6S1; V-type H+-transporting ATPase S1 subunit	0.0191593	0.0278506	0.0133463	0.00344796	0.0260969	0.014519	0.0215372	0.0155182	0.00129348	0.3208	0.0211409	0.0997621	0.0154102	0.0153876	0.032418	0.00346871	0.00682509	0.0414757	0.0139706	0.012003	0.0560382	0.0722563	0.0352805	0.0461068	0.0372151	0.017782	0.0577014	0.031559	0.0292639	0.00363857	0.0170101	0.0251652	0.0453168	0.0450836	0.0327081	0.0442977	0.050091	0.0386202	0.0443924	0.035431	0.031278	0.100741	7.98425e-05	0.000809933	0.000106588	0.00014515	5.86893e-05
fraction	K03644	hfq; host factor-I protein	0.0101957	0.00495336	0.00854146				0.0177465	0.00176032	0.00380729	0.0161825	0.0433146	0.240673			0.00124539	0.000292153		7.01776e-05	0.0128909	0.00601488									0.000168944		0.000378913				0.000450479		0.00120714	0.000332068					0.000211376
fraction	K03645	hslU; ATP-dependent HslUV protease ATP-binding subunit HslU	0.00547907	0.033192	0.00857781	0.00049429	0.00606028	0.200689	0.00539194	0.0127297	0.000819621	0.00723023	0.00691392	0.0059441	0.0113438	0.00746385	0.0105675	0.00788616	0.00418443	0.00750337	0.0104232	0.0283663	0.00030604	0.0194767	0.012073	0.000121273	0.00163492	0.00221896	0.0425203	0.0171182	0.00811598	0.00265298	0.00251587	0.00346802	0.00776481	0.0549866	0.0159491	0.00202419	0.00106494	6.42081e-05	0.0141522	0.0195724	0.00272671	0.0196867		0.00125993			0.000731226
fraction	K03650	dsbA; protein dithiol oxidoreductase (disulfide-forming) [EC:1.8.4.15]	4.39342e-06	0.000296611					0.000117571	6.91551e-05	1.46623e-05						1.74414e-05	6.05459e-05		8.28241e-05	0.000107587	8.24693e-05				0.000535153		0.000348631		0.00115553	0.000805672		0.000239084				0.00115649		0.000265137	0.000100214	0.000526247	0.000483704	9.50061e-05
fraction	K03654	rnc, DROSHA, RNT1; ribonuclease III [EC:3.1.26.3]	0.00748874	0.0183346	0.00447996	0.00392935	0.0396556	0.0232413	0.00211769	0.00436334	6.17624e-05	0.0023673	0.35582	0.000968127	0.245893	0.00190808	0.00329241	0.000711226	0.0199825	0.00449142	0.000466694	0.0100115	0.00468035	0.000568465	0.000125368		9.01109e-05		3.86118e-05			0.000379977						6.76194e-05	0.00144839	0.000303346				7.02261e-05
fraction	K03657	dnaJ; molecular chaperone DnaJ	0.0206585	0.0329688	0.0157973	0.00137176	0.0532867	0.0460086	0.00699387	0.012586	0.0609391	0.00814061	0.0581011	0.0042139	0.00574301	0.00208343	0.0242692	0.000225441	0.0106355	0.00345867	0.00642767	0.0123744		0.000536969	0.000704684	0.00119031	0.00129258	0.000684484		0.00146464	0.000917598	1.42136e-05		0.000170517	0.00459318	0.000278703	0.000325674	4.24512e-05	0.000120024		0.000916367	0.00127253	0.000292867		3.53696e-05	0.000802652
fraction	K03662	GRPE; molecular chaperone GrpE	6.61799e-05	0.000209453					0.000996217		1.6126e-05	0.00154995					0.00266115				5.55503e-05	0.00134889																							0.00430246	0.0253327	0.0830793	0.0202554	0.0499785
fraction	K03666	ubiB, aarF; ubiquinone biosynthesis protein	0.181401	0.0212978	0.0664365	0.000521226	0.0050265	0.0192711	0.00648269	0.0383633	0.000527818	0.0440585	0.00419143	0.00306087	0.00199856	0.00818827	0.00785638	0.000316319	0.0546215	0.0345457	0.0277173	0.0199439	0.0013107	0.00339265	0.00968806	0.0495649	0.0173551	0.00781396	0.0712448	0.37071	0.237262	0.0305122	0.0346853	0.0689323	0.161165	0.0255839	0.130314	0.0645487	0.0413921	0.0070357	0.0169588	0.625318	0.0280817	0.0962806		0.0618691
fraction	K03667	clpA; ATP-dependent Clp protease ATP-binding subunit ClpA	0.0117172	0.0258441	0.0046328	0.000303788	0.000233465	0.00120419	0.00897811	0.00226633	0.00078657	0.00989956	0.00222441	0.00101532	0.000639055	0.00402737	0.000937033	8.27407e-05	0.000107755	0.00191843	0.00792519	0.012527	0.0298346	0.0645995	0.0736525	0.0106423	0.0110025	0.0119567	0.0100347	0.00616829	0.0162271	9.972e-05	0.00648255	0.015133	0.0523151	0.0127379	0.0103455	0.0153265	0.00841027	0.00464013	0.00551363	0.00844166	0.0259057	0.00400872	0.00537304	0.00569406	0.00511042	0.0102088	0.00390074
fraction	K03673	clpB; ATP-dependent Clp protease ATP-binding subunit ClpB	0.0793431	0.0681221	0.0378068	0.00244995	0.0197508	0.0281335	0.0365918	0.0753391	0.100114	0.0348355	0.0249716	0.0236811	0.017973	0.036874	0.0496884	0.0204828	0.0061068	0.0319105	0.0497451	0.0474756		7.93564e-05	0.00181358	0.00056918	0.00036976	0.000261381	0.000115065	0.0016246	0.00208122	0.000230577		0.000114459	0.00219166	0.00238589	0.00135459	5.56344e-05	0.000726571	0.000366389	0.00128154	0.00154197		4.80371e-05	0.00504124	0.0151632	0.00112361		2.73443e-05
fraction	K03685	uvrA; excinuclease ABC subunit A	0.00323868	0.0064468	0.00242518	0.00145372	0.00103609	0.000198703	0.0054918	0.000304382	0.000620161	0.000443012	0.00190216	0.000952715	0.00216302	0.000244155	0.0193938	0.00689783	0.0201742	0.0158221	0.00891609	0.0193266																							0.000108333	1.95446e-05	1.66195e-05	0.000151384	3.48107e-05
[truncated: 800 more rows]
[truncated: 14 more columns]
