# Supplementary material for: Metaproteomic analysis decodes the trophic basis of microbes in the dark ocean
Source: Research Square preprint supplement (doi:10.21203/rs.3.rs-2727130/v1), 2023-04-07
Supplement: Supplementary file 4 [file Supplementary dataset9.xlsx]

## Sheet: Summary
grp	probe	n	med_uptake	sd_uptake
Stn_Proteome	Alt	62	0.027246	0.331105
Stn_Proteome	DAPI	46766	0.0459716	0.13046
Stn_Proteome	EUB	2815	0.0570479	0.185791
Stn_Others	Alt	71	0.0200286	0.209344
Stn_Others	DAPI	32544	0.0564244	0.222547
Stn_Others	EUB	2194	0.0827999	0.388915

## Sheet: Raw_data
grp	cruise	station	depth_m	incubation	probe	cell specific leu uptake (amol leu /cell/d)
Stn_Others	M139	A5_6	450	ISMI	DAPI	0.424956
Stn_Others	M139	A5_6	450	ISMI	DAPI	0.21318
Stn_Others	M139	A5_6	450	ISMI	DAPI	0.0543555
Stn_Others	M139	A5_6	450	ISMI	DAPI	0.251121
Stn_Others	M139	A5_6	450	ISMI	DAPI	0.258239
Stn_Others	M139	A5_6	450	ISMI	DAPI	0.252303
Stn_Others	M139	A5_6	450	ISMI	DAPI	0.450534
Stn_Others	M139	A5_6	450	ISMI	DAPI	0.0297805
Stn_Others	M139	A5_6	450	ISMI	DAPI	0.139919
Stn_Others	M139	A5_6	450	ISMI	DAPI	0.0586644
Stn_Others	M139	A5_6	450	ISMI	DAPI	0.0630815
Stn_Others	M139	A5_6	450	ISMI	DAPI	0.120943
Stn_Others	M139	A5_6	450	ISMI	DAPI	0.0825966
Stn_Others	M139	A5_6	450	ISMI	DAPI	0.053648
Stn_Others	M139	A5_6	450	ISMI	DAPI	0.139919
Stn_Others	M139	A5_6	450	ISMI	DAPI	0.297303
Stn_Others	M139	A5_6	450	ISMI	DAPI	0.132218
Stn_Others	M139	A5_6	450	ISMI	DAPI	0.0858783
Stn_Others	M139	A5_6	450	ISMI	DAPI	0.172137
Stn_Others	M139	A5_6	450	ISMI	DAPI	0.170059
Stn_Others	M139	A5_6	450	ISMI	DAPI	0.0908802
Stn_Others	M139	A5_6	450	ISMI	DAPI	0.182653
Stn_Others	M139	A5_6	450	ISMI	DAPI	0.258239
Stn_Others	M139	A5_6	450	ISMI	DAPI	0.0942668
Stn_Others	M139	A5_6	450	ISMI	DAPI	0.0722302
Stn_Others	M139	A5_6	450	ISMI	DAPI	0.0142018
Stn_Others	M139	A5_6	450	ISMI	DAPI	0.0714521
Stn_Others	M139	A5_6	450	ISMI	DAPI	0.219923
Stn_Others	M139	A5_6	450	ISMI	DAPI	0.0976945
Stn_Others	M139	A5_6	450	ISMI	DAPI	0.10644
Stn_Others	M139	A5_6	450	ISMI	DAPI	0.0230976
Stn_Others	M139	A5_6	450	ISMI	DAPI	0.0230976
Stn_Others	M139	A5_6	450	ISMI	DAPI	0.042107
Stn_Others	M139	A5_6	450	ISMI	DAPI	0.146776
Stn_Others	M139	A5_6	450	ISMI	DAPI	0.128423
Stn_Others	M139	A5_6	450	ISMI	DAPI	0.212063
Stn_Others	M139	A5_6	450	ISMI	DAPI	0.212063
Stn_Others	M139	A5_6	450	ISMI	DAPI	0.0951199
Stn_Others	M139	A5_6	450	ISMI	DAPI	0.0934163
Stn_Others	M139	A5_6	450	ISMI	DAPI	0.198811
Stn_Others	M139	A5_6	450	ISMI	DAPI	0.191214
Stn_Others	M139	A5_6	450	ISMI	DAPI	0.193374
Stn_Others	M139	A5_6	450	ISMI	DAPI	0.0842321
Stn_Others	M139	A5_6	450	ISMI	DAPI	0.0586644
Stn_Others	M139	A5_6	450	ISMI	DAPI	0.0408115
Stn_Others	M139	A5_6	450	ISMI	DAPI	0.0408115
Stn_Others	M139	A5_6	450	ISMI	DAPI	0.194458
Stn_Others	M139	A5_6	450	ISMI	DAPI	0.157769
Stn_Others	M139	A5_6	450	ISMI	DAPI	0.157769
Stn_Others	M139	A5_6	450	ISMI	DAPI	0.105554
Stn_Others	M139	A5_6	450	ISMI	DAPI	0.13413
Stn_Others	M139	A5_6	450	ISMI	DAPI	0.0825966
Stn_Others	M139	A5_6	450	ISMI	DAPI	0.179476
Stn_Others	M139	A5_6	450	ISMI	DAPI	0.0189674
Stn_Others	M139	A5_6	450	ISMI	DAPI	0.304829
Stn_Others	M139	A5_6	450	ISMI	DAPI	0.304829
Stn_Others	M139	A5_6	450	ISMI	DAPI	0.257048
Stn_Others	M139	A5_6	450	ISMI	DAPI	0.133173
Stn_Others	M139	A5_6	450	ISMI	DAPI	0.0474221
Stn_Others	M139	A5_6	450	ISMI	DAPI	0.0427598
Stn_Others	M139	A5_6	450	ISMI	DAPI	0.12748
Stn_Others	M139	A5_6	450	ISMI	DAPI	0.0699045
Stn_Others	M139	A5_6	450	ISMI	DAPI	0.0209987
Stn_Others	M139	A5_6	450	ISMI	DAPI	0.0722302
Stn_Others	M139	A5_6	450	ISMI	DAPI	0.0691349
Stn_Others	M139	A5_6	450	ISMI	DAPI	0.011571
Stn_Others	M139	A5_6	450	ISMI	DAPI	0.011571
Stn_Others	M139	A5_6	450	ISMI	DAPI	0.102912
Stn_Others	M139	A5_6	450	ISMI	DAPI	0.102036
Stn_Others	M139	A5_6	450	ISMI	DAPI	0.232467
Stn_Others	M139	A5_6	450	ISMI	DAPI	0.12748
Stn_Others	M139	A5_6	450	ISMI	DAPI	0.170059
Stn_Others	M139	A5_6	450	ISMI	DAPI	0.170059
Stn_Others	M139	A5_6	450	ISMI	DAPI	0.0976945
Stn_Others	M139	A5_6	450	ISMI	DAPI	0.0793577
Stn_Others	M139	A5_6	450	ISMI	DAPI	0.0230976
Stn_Others	M139	A5_6	450	ISMI	DAPI	0.186917
Stn_Others	M139	A5_6	450	ISMI	DAPI	0.0976945
Stn_Others	M139	A5_6	450	ISMI	DAPI	0.0564963
Stn_Others	M139	A5_6	450	ISMI	DAPI	0.0543555
Stn_Others	M139	A5_6	450	ISMI	DAPI	0.0508494
Stn_Others	M139	A5_6	450	ISMI	DAPI	0.013751
Stn_Others	M139	A5_6	450	ISMI	DAPI	0.141867
Stn_Others	M139	A5_6	450	ISMI	DAPI	0.12748
Stn_Others	M139	A5_6	450	ISMI	DAPI	0.100292
Stn_Others	M139	A5_6	450	ISMI	DAPI	0.0508494
Stn_Others	M139	A5_6	450	ISMI	DAPI	0.0934163
Stn_Others	M139	A5_6	450	ISMI	DAPI	0.258239
Stn_Others	M139	A5_6	450	ISMI	DAPI	0.206506
Stn_Others	M139	A5_6	450	ISMI	DAPI	0.142844
Stn_Others	M139	A5_6	450	ISMI	DAPI	0.0908802
Stn_Others	M139	A5_6	450	ISMI	DAPI	0.216543
Stn_Others	M139	A5_6	450	ISMI	DAPI	0.176318
Stn_Others	M139	A5_6	450	ISMI	DAPI	0.17527
Stn_Others	M139	A5_6	450	ISMI	DAPI	0.15575
Stn_Others	M139	A5_6	450	ISMI	DAPI	0.0745812
Stn_Others	M139	A5_6	450	ISMI	DAPI	0.0706769
Stn_Others	M139	A5_6	450	ISMI	DAPI	0.0653298
Stn_Others	M139	A5_6	450	ISMI	DAPI	0.210947
Stn_Others	M139	A5_6	450	ISMI	DAPI	0.0220398
Stn_Others	M139	A5_6	450	ISMI	DAPI	0.0220398
Stn_Others	M139	A5_6	450	ISMI	DAPI	0.1256
Stn_Others	M139	A5_6	450	ISMI	DAPI	0.11726
Stn_Others	M139	A5_6	450	ISMI	DAPI	0.00183218
Stn_Others	M139	A5_6	450	ISMI	DAPI	0.163875
Stn_Others	M139	A5_6	450	ISMI	DAPI	0.0942668
Stn_Others	M139	A5_6	450	ISMI	DAPI	0.0761624
Stn_Others	M139	A5_6	450	ISMI	DAPI	0.0280572
Stn_Others	M139	A5_6	450	ISMI	DAPI	0.0985578
Stn_Others	M139	A5_6	450	ISMI	DAPI	0.0858783
Stn_Others	M139	A5_6	450	ISMI	DAPI	0.0170063
Stn_Others	M139	A5_6	450	ISMI	DAPI	0.0170063
Stn_Others	M139	A5_6	450	ISMI	DAPI	0.0151179
Stn_Others	M139	A5_6	450	ISMI	DAPI	0.100292
Stn_Others	M139	A5_6	450	ISMI	DAPI	0.166958
Stn_Others	M139	A5_6	450	ISMI	DAPI	0.0951199
Stn_Others	M139	A5_6	450	ISMI	DAPI	0.0801634
Stn_Others	M139	A5_6	450	ISMI	DAPI	0.0501576
Stn_Others	M139	A5_6	450	ISMI	DAPI	0.173179
Stn_Others	M139	A5_6	450	ISMI	DAPI	0.13798
Stn_Others	M139	A5_6	450	ISMI	DAPI	0.032131
Stn_Others	M139	A5_6	450	ISMI	DAPI	0.0842321
Stn_Others	M139	A5_6	450	ISMI	DAPI	0.0706769
Stn_Others	M139	A5_6	450	ISMI	DAPI	0.0440754
Stn_Others	M139	A5_6	450	ISMI	DAPI	0.0440754
Stn_Others	M139	A5_6	450	ISMI	DAPI	0.178422
Stn_Others	M139	A5_6	450	ISMI	DAPI	0.112709
Stn_Others	M139	A5_6	450	ISMI	DAPI	0.0825966
Stn_Others	M139	A5_6	450	ISMI	DAPI	0.0522425
Stn_Others	M139	A5_6	450	ISMI	DAPI	0.0522425
Stn_Others	M139	A5_6	450	ISMI	DAPI	0.15575
Stn_Others	M139	A5_6	450	ISMI	DAPI	0.110008
Stn_Others	M139	A5_6	450	ISMI	DAPI	0.0985578
Stn_Others	M139	A5_6	450	ISMI	DAPI	0.0263684
Stn_Others	M139	A5_6	450	ISMI	DAPI	0.204298
Stn_Others	M139	A5_6	450	ISMI	DAPI	0.0543555
Stn_Others	M139	A5_6	450	ISMI	DAPI	0.132218
Stn_Others	M139	A5_6	450	ISMI	DAPI	0.12748
Stn_Others	M139	A5_6	450	ISMI	DAPI	0.0623379
Stn_Others	M139	A5_6	450	ISMI	DAPI	0.0209987
Stn_Others	M139	A5_6	450	ISMI	DAPI	0.0209987
Stn_Others	M139	A5_6	450	ISMI	DAPI	0.1256
Stn_Others	M139	A5_6	450	ISMI	DAPI	0.116345
Stn_Others	M139	A5_6	450	ISMI	DAPI	0.131266
Stn_Others	M139	A5_6	450	ISMI	DAPI	0.0809717
Stn_Others	M139	A5_6	450	ISMI	DAPI	0.0801634
Stn_Others	M139	A5_6	450	ISMI	DAPI	0.0557796
Stn_Others	M139	A5_6	450	ISMI	DAPI	0.0522425
Stn_Others	M139	A5_6	450	ISMI	DAPI	0.0376323
Stn_Others	M139	A5_6	450	ISMI	DAPI	0.0252621
Stn_Others	M139	A5_6	450	ISMI	DAPI	0.00835541
Stn_Others	M139	A5_6	450	ISMI	DAPI	0.112709
Stn_Others	M139	A5_6	450	ISMI	DAPI	0.108219
Stn_Others	M139	A5_6	450	ISMI	DAPI	0.0994236
Stn_Others	M139	A5_6	450	ISMI	DAPI	0.0994236
Stn_Others	M139	A5_6	450	ISMI	DAPI	0.0976945
Stn_Others	M139	A5_6	450	ISMI	DAPI	0.0908802
Stn_Others	M139	A5_6	450	ISMI	DAPI	0.0653298
Stn_Others	M139	A5_6	450	ISMI	DAPI	0.190136
Stn_Others	M139	A5_6	450	ISMI	DAPI	0.135089
Stn_Others	M139	A5_6	450	ISMI	DAPI	0.120943
Stn_Others	M139	A5_6	450	ISMI	DAPI	0.0934163
Stn_Others	M139	A5_6	450	ISMI	DAPI	0.0892024
Stn_Others	M139	A5_6	450	ISMI	DAPI	0.0467462
Stn_Others	M139	A5_6	450	ISMI	DAPI	0.0258133
Stn_Others	M139	A5_6	450	ISMI	DAPI	0.0706769
Stn_Others	M139	A5_6	450	ISMI	DAPI	0.0572159
Stn_Others	M139	A5_6	450	ISMI	DAPI	0.0447382
Stn_Others	M139	A5_6	450	ISMI	DAPI	0.0408115
Stn_Others	M139	A5_6	450	ISMI	DAPI	0.212063
Stn_Others	M139	A5_6	450	ISMI	DAPI	0.091723
Stn_Others	M139	A5_6	450	ISMI	DAPI	0.0467462
Stn_Others	M139	A5_6	450	ISMI	DAPI	0.0467462
Stn_Others	M139	A5_6	450	ISMI	DAPI	0.0427598
Stn_Others	M139	A5_6	450	ISMI	DAPI	0.0146575
Stn_Others	M139	A5_6	450	ISMI	DAPI	0.252303
Stn_Others	M139	A5_6	450	ISMI	DAPI	0.252303
Stn_Others	M139	A5_6	450	ISMI	DAPI	0.240569
Stn_Others	M139	A5_6	450	ISMI	DAPI	0.142844
Stn_Others	M139	A5_6	450	ISMI	DAPI	0.13798
Stn_Others	M139	A5_6	450	ISMI	DAPI	0.129368
Stn_Others	M139	A5_6	450	ISMI	DAPI	0.09004
Stn_Others	M139	A5_6	450	ISMI	DAPI	0.0883674
Stn_Others	M139	A5_6	450	ISMI	DAPI	0.0817828
Stn_Others	M139	A5_6	450	ISMI	DAPI	0.0699045
Stn_Others	M139	A5_6	450	ISMI	DAPI	0.0699045
Stn_Others	M139	A5_6	450	ISMI	DAPI	0.055066
Stn_Others	M139	A5_6	450	ISMI	DAPI	0.0529437
Stn_Others	M139	A5_6	450	ISMI	DAPI	0.0474221
Stn_Others	M139	A5_6	450	ISMI	DAPI	0.042107
Stn_Others	M139	A5_6	450	ISMI	DAPI	0.0309483
Stn_Others	M139	A5_6	450	ISMI	DAPI	0.0817828
Stn_Others	M139	A5_6	450	ISMI	DAPI	0.0817828
Stn_Others	M139	A5_6	450	ISMI	DAPI	0.013305
Stn_Others	M139	A5_6	450	ISMI	DAPI	0.164901
Stn_Others	M139	A5_6	450	ISMI	DAPI	0.132218
Stn_Others	M139	A5_6	450	ISMI	DAPI	0.0842321
Stn_Others	M139	A5_6	450	ISMI	DAPI	0.0761624
Stn_Others	M139	A5_6	450	ISMI	DAPI	0.0761624
Stn_Others	M139	A5_6	450	ISMI	DAPI	0.0608596
Stn_Others	M139	A5_6	450	ISMI	DAPI	0.0427598
Stn_Others	M139	A5_6	450	ISMI	DAPI	0.0363849
Stn_Others	M139	A5_6	450	ISMI	DAPI	0.0315378
Stn_Others	M139	A5_6	450	ISMI	DAPI	0.136051
Stn_Others	M139	A5_6	450	ISMI	DAPI	0.042107
Stn_Others	M139	A5_6	450	ISMI	DAPI	0.00282083
Stn_Others	M139	A5_6	450	ISMI	DAPI	0.00282083
Stn_Others	M139	A5_6	450	ISMI	DAPI	0.192293
Stn_Others	M139	A5_6	450	ISMI	DAPI	0.0653298
Stn_Others	M139	A5_6	450	ISMI	DAPI	0.0199744
Stn_Others	M139	A5_6	450	ISMI	DAPI	0.015583
Stn_Others	M139	A5_6	450	ISMI	DAPI	0.162852
Stn_Others	M139	A5_6	450	ISMI	DAPI	0.0730111
Stn_Others	M139	A5_6	450	ISMI	DAPI	0.0683681
Stn_Others	M139	A5_6	450	ISMI	DAPI	0.0564963
Stn_Others	M139	A5_6	450	ISMI	DAPI	0.0236327
Stn_Others	M139	A5_6	450	ISMI	DAPI	0.00653031
Stn_Others	M139	A5_6	450	ISMI	DAPI	0.174223
Stn_Others	M139	A5_6	450	ISMI	DAPI	0.148755
Stn_Others	M139	A5_6	450	ISMI	DAPI	0.122799
Stn_Others	M139	A5_6	450	ISMI	DAPI	0.115432
Stn_Others	M139	A5_6	450	ISMI	DAPI	0.110008
Stn_Others	M139	A5_6	450	ISMI	DAPI	0.0769571
Stn_Others	M139	A5_6	450	ISMI	DAPI	0.0676043
Stn_Others	M139	A5_6	450	ISMI	DAPI	0.0474221
Stn_Others	M139	A5_6	450	ISMI	DAPI	0.0194688
Stn_Others	M139	A5_6	450	ISMI	DAPI	0.214299
Stn_Others	M139	A5_6	450	ISMI	DAPI	0.21318
Stn_Others	M139	A5_6	450	ISMI	DAPI	0.191214
Stn_Others	M139	A5_6	450	ISMI	DAPI	0.145789
Stn_Others	M139	A5_6	450	ISMI	DAPI	0.107328
Stn_Others	M139	A5_6	450	ISMI	DAPI	0.102912
Stn_Others	M139	A5_6	450	ISMI	DAPI	0.0951199
Stn_Others	M139	A5_6	450	ISMI	DAPI	0.0601249
Stn_Others	M139	A5_6	450	ISMI	DAPI	0.0467462
Stn_Others	M139	A5_6	450	ISMI	DAPI	0.0111503
Stn_Others	M139	A5_6	450	ISMI	DAPI	0.433427
Stn_Others	M139	A5_6	450	ISMI	DAPI	0.191214
Stn_Others	M139	A5_6	450	ISMI	DAPI	0.181592
Stn_Others	M139	A5_6	450	ISMI	DAPI	0.135089
Stn_Others	M139	A5_6	450	ISMI	DAPI	0.0817828
Stn_Others	M139	A5_6	450	ISMI	DAPI	0.170059
Stn_Others	M139	A5_6	450	ISMI	DAPI	0.0564963
Stn_Others	M139	A5_6	450	ISMI	DAPI	0.0508494
Stn_Others	M139	A5_6	450	ISMI	DAPI	0.0258133
Stn_Others	M139	A5_6	450	ISMI	DAPI	0.0220398
Stn_Others	M139	A5_6	450	ISMI	DAPI	0.130316
Stn_Others	M139	A5_6	450	ISMI	DAPI	0.116345
Stn_Others	M139	A5_6	450	ISMI	DAPI	0.0745812
Stn_Others	M139	A5_6	450	ISMI	DAPI	0.0501576
Stn_Others	M139	A5_6	450	ISMI	DAPI	0.0501576
Stn_Others	M139	A5_6	450	ISMI	DAPI	0.0447382
Stn_Others	M139	A5_6	450	ISMI	DAPI	0.012864
Stn_Others	M139	A5_6	450	ISMI	DAPI	0.00724233
Stn_Others	M139	A5_6	450	ISMI	DAPI	0.00336593
Stn_Others	M139	A5_6	450	ISMI	DAPI	0.110008
Stn_Others	M139	A5_6	450	ISMI	DAPI	0.0236327
Stn_Others	M139	A5_6	450	ISMI	DAPI	0.0236327
Stn_Others	M139	A5_6	450	ISMI	DAPI	0.012864
Stn_Others	M139	A5_6	450	ISMI	DAPI	0.0737947
Stn_Others	M139	A5_6	450	ISMI	DAPI	0.0683681
Stn_Others	M139	A5_6	450	ISMI	DAPI	0.0683681
Stn_Others	M139	A5_6	450	ISMI	DAPI	0.0660851
Stn_Others	M139	A5_6	450	ISMI	DAPI	0.0579387
Stn_Others	M139	A5_6	450	ISMI	DAPI	0.0543555
Stn_Others	M139	A5_6	450	ISMI	DAPI	0.0382612
Stn_Others	M139	A5_6	450	ISMI	DAPI	0.0382612
Stn_Others	M139	A5_6	450	ISMI	DAPI	0.0274904
Stn_Others	M139	A5_6	450	ISMI	DAPI	0.0269275
Stn_Others	M139	A5_6	450	ISMI	DAPI	0.173179
Stn_Others	M139	A5_6	450	ISMI	DAPI	0.138949
Stn_Others	M139	A5_6	450	ISMI	DAPI	0.104671
Stn_Others	M139	A5_6	450	ISMI	DAPI	0.083413
Stn_Others	M139	A5_6	450	ISMI	DAPI	0.0327278
Stn_Others	M139	A5_6	450	ISMI	DAPI	0.0327278
Stn_Others	M139	A5_6	450	ISMI	DAPI	0.0315378
Stn_Others	M139	A5_6	450	ISMI	DAPI	0.0215171
Stn_Others	M139	A5_6	450	ISMI	DAPI	0.0215171
Stn_Others	M139	A5_6	450	ISMI	DAPI	0.120019
Stn_Others	M139	A5_6	450	ISMI	DAPI	0.0892024
Stn_Others	M139	A5_6	450	ISMI	DAPI	0.0817828
Stn_Others	M139	A5_6	450	ISMI	DAPI	0.0793577
Stn_Others	M139	A5_6	450	ISMI	DAPI	0.0706769
Stn_Others	M139	A5_6	450	ISMI	DAPI	0.063828
Stn_Others	M139	A5_6	450	ISMI	DAPI	0.0543555
Stn_Others	M139	A5_6	450	ISMI	DAPI	0.0345402
Stn_Others	M139	A5_6	450	ISMI	DAPI	0.241734
Stn_Others	M139	A5_6	450	ISMI	DAPI	0.10644
Stn_Others	M139	A5_6	450	ISMI	DAPI	0.0867054
Stn_Others	M139	A5_6	450	ISMI	DAPI	0.0817828
Stn_Others	M139	A5_6	450	ISMI	DAPI	0.0737947
Stn_Others	M139	A5_6	450	ISMI	DAPI	0.0645775
Stn_Others	M139	A5_6	450	ISMI	DAPI	0.0572159
Stn_Others	M139	A5_6	450	ISMI	DAPI	0.042107
Stn_Others	M139	A5_6	450	ISMI	DAPI	0.0184705
Stn_Others	M139	A5_6	450	ISMI	DAPI	0.0165273
Stn_Others	M139	A5_6	450	ISMI	DAPI	0.00991972
Stn_Others	M139	A5_6	450	ISMI	DAPI	0.00653031
Stn_Others	M139	A5_6	450	ISMI	DAPI	0.00282083
Stn_Others	M139	A5_6	450	ISMI	DAPI	0.185848
Stn_Others	M139	A5_6	450	ISMI	DAPI	0.143824
Stn_Others	M139	A5_6	450	ISMI	DAPI	0.118177
Stn_Others	M139	A5_6	450	ISMI	DAPI	0.0204844
Stn_Others	M139	A5_6	450	ISMI	DAPI	0.399881
Stn_Others	M139	A5_6	450	ISMI	DAPI	0.139919
Stn_Others	M139	A5_6	450	ISMI	DAPI	0.063828
Stn_Others	M139	A5_6	450	ISMI	DAPI	0.0382612
Stn_Others	M139	A5_6	450	ISMI	DAPI	0.0345402
Stn_Others	M139	A5_6	450	ISMI	DAPI	0.032131
Stn_Others	M139	A5_6	450	ISMI	DAPI	0.0292023
Stn_Others	M139	A5_6	450	ISMI	DAPI	0.0292023
Stn_Others	M139	A5_6	450	ISMI	DAPI	0.0236327
Stn_Others	M139	A5_6	450	ISMI	DAPI	0.012864
Stn_Others	M139	A5_6	450	ISMI	DAPI	0.153741
Stn_Others	M139	A5_6	450	ISMI	DAPI	0.13413
Stn_Others	M139	A5_6	450	ISMI	DAPI	0.0968337
Stn_Others	M139	A5_6	450	ISMI	DAPI	0.0934163
Stn_Others	M139	A5_6	450	ISMI	DAPI	0.083413
Stn_Others	M139	A5_6	450	ISMI	DAPI	0.0676043
Stn_Others	M139	A5_6	450	ISMI	DAPI	0.063828
Stn_Others	M139	A5_6	450	ISMI	DAPI	0.0564963
Stn_Others	M139	A5_6	450	ISMI	DAPI	0.0376323
Stn_Others	M139	A5_6	450	ISMI	DAPI	0.163875
Stn_Others	M139	A5_6	450	ISMI	DAPI	0.0297805
Stn_Others	M139	A5_6	450	ISMI	DAPI	0.013751
Stn_Others	M139	A5_6	450	ISMI	DAPI	0.00991972
Stn_Others	M139	A5_6	450	ISMI	DAPI	0.205401
Stn_Others	M139	A5_6	450	ISMI	DAPI	0.109112
Stn_Others	M139	A5_6	450	ISMI	DAPI	0.109112
Stn_Others	M139	A5_6	450	ISMI	DAPI	0.0825966
Stn_Others	M139	A5_6	450	ISMI	DAPI	0.0668432
Stn_Others	M139	A5_6	450	ISMI	DAPI	0.055066
Stn_Others	M139	A5_6	450	ISMI	DAPI	0.0474221
Stn_Others	M139	A5_6	450	ISMI	DAPI	0.0142018
Stn_Others	M139	A5_6	450	ISMI	DAPI	0.00308937
Stn_Others	M139	A5_6	450	ISMI	DAPI	0.166958
Stn_Others	M139	A5_6	450	ISMI	DAPI	0.156758
Stn_Others	M139	A5_6	450	ISMI	DAPI	0.12748
Stn_Others	M139	A5_6	450	ISMI	DAPI	0.122799
Stn_Others	M139	A5_6	450	ISMI	DAPI	0.11726
Stn_Others	M139	A5_6	450	ISMI	DAPI	0.110008
Stn_Others	M139	A5_6	450	ISMI	DAPI	0.102912
Stn_Others	M139	A5_6	450	ISMI	DAPI	0.102036
Stn_Others	M139	A5_6	450	ISMI	DAPI	0.0892024
Stn_Others	M139	A5_6	450	ISMI	DAPI	0.0761624
Stn_Others	M139	A5_6	450	ISMI	DAPI	0.0572159
Stn_Others	M139	A5_6	450	ISMI	DAPI	0.0345402
Stn_Others	M139	A5_6	450	ISMI	DAPI	0.0327278
Stn_Others	M139	A5_6	450	ISMI	DAPI	0.0269275
Stn_Others	M139	A5_6	450	ISMI	DAPI	0.00873806
Stn_Others	M139	A5_6	450	ISMI	DAPI	0.00365029
Stn_Others	M139	A5_6	450	ISMI	DAPI	0.171097
Stn_Others	M139	A5_6	450	ISMI	DAPI	0.158781
Stn_Others	M139	A5_6	450	ISMI	DAPI	0.154744
Stn_Others	M139	A5_6	450	ISMI	DAPI	0.144805
Stn_Others	M139	A5_6	450	ISMI	DAPI	0.130316
Stn_Others	M139	A5_6	450	ISMI	DAPI	0.100292
Stn_Others	M139	A5_6	450	ISMI	DAPI	0.0615973
Stn_Others	M139	A5_6	450	ISMI	DAPI	0.055066
Stn_Others	M139	A5_6	450	ISMI	DAPI	0.0522425
Stn_Others	M139	A5_6	450	ISMI	DAPI	0.0474221
Stn_Others	M139	A5_6	450	ISMI	DAPI	0.0460736
Stn_Others	M139	A5_6	450	ISMI	DAPI	0.0395295
Stn_Others	M139	A5_6	450	ISMI	DAPI	0.0174899
Stn_Others	M139	A5_6	450	ISMI	DAPI	0.00394223
Stn_Others	M139	A5_6	450	ISMI	DAPI	0.153741
Stn_Others	M139	A5_6	450	ISMI	DAPI	0.108219
Stn_Others	M139	A5_6	450	ISMI	DAPI	0.0875351
Stn_Others	M139	A5_6	450	ISMI	DAPI	0.063828
Stn_Others	M139	A5_6	450	ISMI	DAPI	0.063828
Stn_Others	M139	A5_6	450	ISMI	DAPI	0.0586644
Stn_Others	M139	A5_6	450	ISMI	DAPI	0.0408115
Stn_Others	M139	A5_6	450	ISMI	DAPI	0.0209987
Stn_Others	M139	A5_6	450	ISMI	DAPI	0.0151179
Stn_Others	M139	A5_6	450	ISMI	DAPI	0.15174
Stn_Others	M139	A5_6	450	ISMI	DAPI	0.12748
Stn_Others	M139	A5_6	450	ISMI	DAPI	0.12187
Stn_Others	M139	A5_6	450	ISMI	DAPI	0.118177
Stn_Others	M139	A5_6	450	ISMI	DAPI	0.0160528
Stn_Others	M139	A5_6	450	ISMI	DAPI	0.173179
Stn_Others	M139	A5_6	450	ISMI	DAPI	0.0801634
Stn_Others	M139	A5_6	450	ISMI	DAPI	0.0761624
Stn_Others	M139	A5_6	450	ISMI	DAPI	0.0761624
Stn_Others	M139	A5_6	450	ISMI	DAPI	0.0529437
Stn_Others	M139	A5_6	450	ISMI	DAPI	0.0408115
Stn_Others	M139	A5_6	450	ISMI	DAPI	0.0395295
Stn_Others	M139	A5_6	450	ISMI	DAPI	0.0333283
Stn_Others	M139	A5_6	450	ISMI	DAPI	0.00797851
Stn_Others	M139	A5_6	450	ISMI	DAPI	0.272673
Stn_Others	M139	A5_6	450	ISMI	DAPI	0.266627
Stn_Others	M139	A5_6	450	ISMI	DAPI	0.0777546
Stn_Others	M139	A5_6	450	ISMI	DAPI	0.0722302
Stn_Others	M139	A5_6	450	ISMI	DAPI	0.0579387
Stn_Others	M139	A5_6	450	ISMI	DAPI	0.0564963
Stn_Others	M139	A5_6	450	ISMI	DAPI	0.0467462
Stn_Others	M139	A5_6	450	ISMI	DAPI	0.0215171
Stn_Others	M139	A5_6	450	ISMI	DAPI	0.276322
Stn_Others	M139	A5_6	450	ISMI	DAPI	0.227879
Stn_Others	M139	A5_6	450	ISMI	DAPI	0.209834
Stn_Others	M139	A5_6	450	ISMI	DAPI	0.199904
Stn_Others	M139	A5_6	450	ISMI	DAPI	0.193374
Stn_Others	M139	A5_6	450	ISMI	DAPI	0.193374
Stn_Others	M139	A5_6	450	ISMI	DAPI	0.187988
Stn_Others	M139	A5_6	450	ISMI	DAPI	0.176318
Stn_Others	M139	A5_6	450	ISMI	DAPI	0.17527
Stn_Others	M139	A5_6	450	ISMI	DAPI	0.160812
Stn_Others	M139	A5_6	450	ISMI	DAPI	0.157769
Stn_Others	M139	A5_6	450	ISMI	DAPI	0.15575
Stn_Others	M139	A5_6	450	ISMI	DAPI	0.153741
Stn_Others	M139	A5_6	450	ISMI	DAPI	0.152739
Stn_Others	M139	A5_6	450	ISMI	DAPI	0.150742
Stn_Others	M139	A5_6	450	ISMI	DAPI	0.147764
Stn_Others	M139	A5_6	450	ISMI	DAPI	0.146776
Stn_Others	M139	A5_6	450	ISMI	DAPI	0.145789
Stn_Others	M139	A5_6	450	ISMI	DAPI	0.141867
Stn_Others	M139	A5_6	450	ISMI	DAPI	0.139919
Stn_Others	M139	A5_6	450	ISMI	DAPI	0.139919
Stn_Others	M139	A5_6	450	ISMI	DAPI	0.138949
Stn_Others	M139	A5_6	450	ISMI	DAPI	0.138949
Stn_Others	M139	A5_6	450	ISMI	DAPI	0.131266
Stn_Others	M139	A5_6	450	ISMI	DAPI	0.131266
Stn_Others	M139	A5_6	450	ISMI	DAPI	0.128423
Stn_Others	M139	A5_6	450	ISMI	DAPI	0.12373
Stn_Others	M139	A5_6	450	ISMI	DAPI	0.120019
Stn_Others	M139	A5_6	450	ISMI	DAPI	0.119097
Stn_Others	M139	A5_6	450	ISMI	DAPI	0.11726
Stn_Others	M139	A5_6	450	ISMI	DAPI	0.11726
Stn_Others	M139	A5_6	450	ISMI	DAPI	0.11726
Stn_Others	M139	A5_6	450	ISMI	DAPI	0.115432
Stn_Others	M139	A5_6	450	ISMI	DAPI	0.113614
Stn_Others	M139	A5_6	450	ISMI	DAPI	0.111806
Stn_Others	M139	A5_6	450	ISMI	DAPI	0.111806
Stn_Others	M139	A5_6	450	ISMI	DAPI	0.110906
Stn_Others	M139	A5_6	450	ISMI	DAPI	0.109112
Stn_Others	M139	A5_6	450	ISMI	DAPI	0.109112
Stn_Others	M139	A5_6	450	ISMI	DAPI	0.108219
Stn_Others	M139	A5_6	450	ISMI	DAPI	0.107328
Stn_Others	M139	A5_6	450	ISMI	DAPI	0.105554
Stn_Others	M139	A5_6	450	ISMI	DAPI	0.104671
Stn_Others	M139	A5_6	450	ISMI	DAPI	0.100292
Stn_Others	M139	A5_6	450	ISMI	DAPI	0.0985578
Stn_Others	M139	A5_6	450	ISMI	DAPI	0.0968337
Stn_Others	M139	A5_6	450	ISMI	DAPI	0.0968337
Stn_Others	M139	A5_6	450	ISMI	DAPI	0.0959755
Stn_Others	M139	A5_6	450	ISMI	DAPI	0.0951199
Stn_Others	M139	A5_6	450	ISMI	DAPI	0.0951199
Stn_Others	M139	A5_6	450	ISMI	DAPI	0.09004
Stn_Others	M139	A5_6	450	ISMI	DAPI	0.0883674
Stn_Others	M139	A5_6	450	ISMI	DAPI	0.0875351
Stn_Others	M139	A5_6	450	ISMI	DAPI	0.0875351
Stn_Others	M139	A5_6	450	ISMI	DAPI	0.0867054
Stn_Others	M139	A5_6	450	ISMI	DAPI	0.0867054
Stn_Others	M139	A5_6	450	ISMI	DAPI	0.0858783
Stn_Others	M139	A5_6	450	ISMI	DAPI	0.0850539
Stn_Others	M139	A5_6	450	ISMI	DAPI	0.0850539
Stn_Others	M139	A5_6	450	ISMI	DAPI	0.0850539
Stn_Others	M139	A5_6	450	ISMI	DAPI	0.0842321
Stn_Others	M139	A5_6	450	ISMI	DAPI	0.0842321
Stn_Others	M139	A5_6	450	ISMI	DAPI	0.0825966
Stn_Others	M139	A5_6	450	ISMI	DAPI	0.0809717
Stn_Others	M139	A5_6	450	ISMI	DAPI	0.0793577
Stn_Others	M139	A5_6	450	ISMI	DAPI	0.0785548
Stn_Others	M139	A5_6	450	ISMI	DAPI	0.0777546
Stn_Others	M139	A5_6	450	ISMI	DAPI	0.0777546
Stn_Others	M139	A5_6	450	ISMI	DAPI	0.0777546
Stn_Others	M139	A5_6	450	ISMI	DAPI	0.0761624
Stn_Others	M139	A5_6	450	ISMI	DAPI	0.0761624
Stn_Others	M139	A5_6	450	ISMI	DAPI	0.0745812
Stn_Others	M139	A5_6	450	ISMI	DAPI	0.0737947
Stn_Others	M139	A5_6	450	ISMI	DAPI	0.0730111
Stn_Others	M139	A5_6	450	ISMI	DAPI	0.0722302
Stn_Others	M139	A5_6	450	ISMI	DAPI	0.0706769
Stn_Others	M139	A5_6	450	ISMI	DAPI	0.0706769
Stn_Others	M139	A5_6	450	ISMI	DAPI	0.0706769
Stn_Others	M139	A5_6	450	ISMI	DAPI	0.0699045
Stn_Others	M139	A5_6	450	ISMI	DAPI	0.0699045
Stn_Others	M139	A5_6	450	ISMI	DAPI	0.0691349
Stn_Others	M139	A5_6	450	ISMI	DAPI	0.0683681
Stn_Others	M139	A5_6	450	ISMI	DAPI	0.0676043
Stn_Others	M139	A5_6	450	ISMI	DAPI	0.0676043
Stn_Others	M139	A5_6	450	ISMI	DAPI	0.0645775
Stn_Others	M139	A5_6	450	ISMI	DAPI	0.063828
Stn_Others	M139	A5_6	450	ISMI	DAPI	0.063828
Stn_Others	M139	A5_6	450	ISMI	DAPI	0.0579387
Stn_Others	M139	A5_6	450	ISMI	DAPI	0.0579387
Stn_Others	M139	A5_6	450	ISMI	DAPI	0.0572159
Stn_Others	M139	A5_6	450	ISMI	DAPI	0.0572159
Stn_Others	M139	A5_6	450	ISMI	DAPI	0.0564963
Stn_Others	M139	A5_6	450	ISMI	DAPI	0.055066
Stn_Others	M139	A5_6	450	ISMI	DAPI	0.0543555
Stn_Others	M139	A5_6	450	ISMI	DAPI	0.0529437
Stn_Others	M139	A5_6	450	ISMI	DAPI	0.0522425
Stn_Others	M139	A5_6	450	ISMI	DAPI	0.0501576
Stn_Others	M139	A5_6	450	ISMI	DAPI	0.0501576
Stn_Others	M139	A5_6	450	ISMI	DAPI	0.0487834
Stn_Others	M139	A5_6	450	ISMI	DAPI	0.0481011
Stn_Others	M139	A5_6	450	ISMI	DAPI	0.0481011
Stn_Others	M139	A5_6	450	ISMI	DAPI	0.0481011
Stn_Others	M139	A5_6	450	ISMI	DAPI	0.0460736
Stn_Others	M139	A5_6	450	ISMI	DAPI	0.0460736
Stn_Others	M139	A5_6	450	ISMI	DAPI	0.0460736
Stn_Others	M139	A5_6	450	ISMI	DAPI	0.0454043
Stn_Others	M139	A5_6	450	ISMI	DAPI	0.0454043
Stn_Others	M139	A5_6	450	ISMI	DAPI	0.043416
Stn_Others	M139	A5_6	450	ISMI	DAPI	0.043416
Stn_Others	M139	A5_6	450	ISMI	DAPI	0.043416
Stn_Others	M139	A5_6	450	ISMI	DAPI	0.042107
Stn_Others	M139	A5_6	450	ISMI	DAPI	0.0414575
Stn_Others	M139	A5_6	450	ISMI	DAPI	0.0395295
Stn_Others	M139	A5_6	450	ISMI	DAPI	0.0388936
Stn_Others	M139	A5_6	450	ISMI	DAPI	0.0388936
Stn_Others	M139	A5_6	450	ISMI	DAPI	0.0382612
Stn_Others	M139	A5_6	450	ISMI	DAPI	0.0382612
Stn_Others	M139	A5_6	450	ISMI	DAPI	0.0376323
Stn_Others	M139	A5_6	450	ISMI	DAPI	0.0376323
Stn_Others	M139	A5_6	450	ISMI	DAPI	0.0370068
Stn_Others	M139	A5_6	450	ISMI	DAPI	0.0363849
Stn_Others	M139	A5_6	450	ISMI	DAPI	0.0363849
Stn_Others	M139	A5_6	450	ISMI	DAPI	0.0357664
Stn_Others	M139	A5_6	450	ISMI	DAPI	0.0345402
Stn_Others	M139	A5_6	450	ISMI	DAPI	0.0345402
Stn_Others	M139	A5_6	450	ISMI	DAPI	0.0339325
Stn_Others	M139	A5_6	450	ISMI	DAPI	0.0339325
Stn_Others	M139	A5_6	450	ISMI	DAPI	0.0339325
Stn_Others	M139	A5_6	450	ISMI	DAPI	0.0315378
Stn_Others	M139	A5_6	450	ISMI	DAPI	0.0315378
Stn_Others	M139	A5_6	450	ISMI	DAPI	0.0309483
Stn_Others	M139	A5_6	450	ISMI	DAPI	0.0297805
Stn_Others	M139	A5_6	450	ISMI	DAPI	0.0292023
Stn_Others	M139	A5_6	450	ISMI	DAPI	0.0286278
Stn_Others	M139	A5_6	450	ISMI	DAPI	0.0286278
Stn_Others	M139	A5_6	450	ISMI	DAPI	0.0274904
Stn_Others	M139	A5_6	450	ISMI	DAPI	0.0274904
Stn_Others	M139	A5_6	450	ISMI	DAPI	0.0269275
Stn_Others	M139	A5_6	450	ISMI	DAPI	0.0258133
Stn_Others	M139	A5_6	450	ISMI	DAPI	0.024715
Stn_Others	M139	A5_6	450	ISMI	DAPI	0.0225666
Stn_Others	M139	A5_6	450	ISMI	DAPI	0.0220398
Stn_Others	M139	A5_6	450	ISMI	DAPI	0.0220398
Stn_Others	M139	A5_6	450	ISMI	DAPI	0.0220398
Stn_Others	M139	A5_6	450	ISMI	DAPI	0.0199744
Stn_Others	M139	A5_6	450	ISMI	DAPI	0.0199744
Stn_Others	M139	A5_6	450	ISMI	DAPI	0.0194688
Stn_Others	M139	A5_6	450	ISMI	DAPI	0.0194688
Stn_Others	M139	A5_6	450	ISMI	DAPI	0.0184705
Stn_Others	M139	A5_6	450	ISMI	DAPI	0.0184705
Stn_Others	M139	A5_6	450	ISMI	DAPI	0.017978
Stn_Others	M139	A5_6	450	ISMI	DAPI	0.0165273
Stn_Others	M139	A5_6	450	ISMI	DAPI	0.0160528
Stn_Others	M139	A5_6	450	ISMI	DAPI	0.0160528
Stn_Others	M139	A5_6	450	ISMI	DAPI	0.0160528
Stn_Others	M139	A5_6	450	ISMI	DAPI	0.0160528
Stn_Others	M139	A5_6	450	ISMI	DAPI	0.015583
Stn_Others	M139	A5_6	450	ISMI	DAPI	0.015583
Stn_Others	M139	A5_6	450	ISMI	DAPI	0.015583
Stn_Others	M139	A5_6	450	ISMI	DAPI	0.0151179
Stn_Others	M139	A5_6	450	ISMI	DAPI	0.0151179
Stn_Others	M139	A5_6	450	ISMI	DAPI	0.0151179
Stn_Others	M139	A5_6	450	ISMI	DAPI	0.0142018
Stn_Others	M139	A5_6	450	ISMI	DAPI	0.0142018
Stn_Others	M139	A5_6	450	ISMI	DAPI	0.0142018
Stn_Others	M139	A5_6	450	ISMI	DAPI	0.013751
Stn_Others	M139	A5_6	450	ISMI	DAPI	0.013305
Stn_Others	M139	A5_6	450	ISMI	DAPI	0.012864
Stn_Others	M139	A5_6	450	ISMI	DAPI	0.0124279
Stn_Others	M139	A5_6	450	ISMI	DAPI	0.0119969
Stn_Others	M139	A5_6	450	ISMI	DAPI	0.0111503
Stn_Others	M139	A5_6	450	ISMI	DAPI	0.0111503
Stn_Others	M139	A5_6	450	ISMI	DAPI	0.0107348
Stn_Others	M139	A5_6	450	ISMI	DAPI	0.0103246
Stn_Others	M139	A5_6	450	ISMI	DAPI	0.00991972
Stn_Others	M139	A5_6	450	ISMI	DAPI	0.00991972
Stn_Others	M139	A5_6	450	ISMI	DAPI	0.00991972
Stn_Others	M139	A5_6	450	ISMI	DAPI	0.00873806
Stn_Others	M139	A5_6	450	ISMI	DAPI	0.00873806
Stn_Others	M139	A5_6	450	ISMI	DAPI	0.00724233
Stn_Others	M139	A5_6	450	ISMI	DAPI	0.00724233
Stn_Others	M139	A5_6	450	ISMI	DAPI	0.00618361
Stn_Others	M139	A5_6	450	ISMI	DAPI	0.00550943
Stn_Others	M139	A5_6	450	ISMI	DAPI	0.00550943
Stn_Others	M139	A5_6	450	ISMI	DAPI	0.00424156
Stn_Others	M139	A5_6	450	ISMI	DAPI	0.00365029
Stn_Others	M139	A5_6	450	ISMI	DAPI	0.00336593
Stn_Others	M139	A5_6	450	ISMI	DAPI	0.00308937
Stn_Others	M139	A5_6	450	ISMI	DAPI	0.00308937
Stn_Others	M139	A5_6	450	ISMI	DAPI	0.00282083
Stn_Others	M139	A5_6	450	ISMI	DAPI	0.00206591
Stn_Others	M139	A5_6	450	ISMI	DAPI	0.00206591
Stn_Others	M139	A5_6	450	ISMI	DAPI	0.000352603
Stn_Others	M139	A5_6	450	ISMI	DAPI	0.000352603
Stn_Others	M139	A5_6	450	ISMI	DAPI	0.110008
Stn_Others	M139	A5_6	450	ISMI	DAPI	0.0714521
Stn_Others	M139	A5_6	450	ISMI	DAPI	0.0615973
Stn_Others	M139	A5_6	450	ISMI	DAPI	0.0494689
Stn_Others	M139	A5_6	450	ISMI	DAPI	0.0252621
Stn_Others	M139	A5_6	450	ISMI	DAPI	0.0220398
Stn_Others	M139	A5_6	450	ISMI	DAPI	0.0170063
Stn_Others	M139	A5_6	450	ISMI	DAPI	0.00724233
Stn_Others	M139	A5_6	450	ISMI	DAPI	0.255859
Stn_Others	M139	A5_6	450	ISMI	DAPI	0.179476
Stn_Others	M139	A5_6	450	ISMI	DAPI	0.0630815
Stn_Others	M139	A5_6	450	ISMI	DAPI	0.0557796
Stn_Others	M139	A5_6	450	ISMI	DAPI	0.0481011
Stn_Others	M139	A5_6	450	ISMI	DAPI	0.0230976
Stn_Others	M139	A5_6	450	ISMI	DAPI	0.00797851
Stn_Others	M139	A5_6	450	ISMI	DAPI	0.193374
Stn_Others	M139	A5_6	450	ISMI	DAPI	0.101163
Stn_Others	M139	A5_6	450	ISMI	DAPI	0.0850539
Stn_Others	M139	A5_6	450	ISMI	DAPI	0.0414575
Stn_Others	M139	A5_6	450	ISMI	DAPI	0.0241718
Stn_Others	M139	A5_6	450	ISMI	DAPI	0.0215171
Stn_Others	M139	A5_6	450	ISMI	DAPI	0.00584328
Stn_Others	M139	A5_6	450	ISMI	DAPI	0.115432
Stn_Others	M139	A5_6	450	ISMI	DAPI	0.0892024
Stn_Others	M139	A5_6	450	ISMI	DAPI	0.0447382
Stn_Others	M139	A5_6	450	ISMI	DAPI	0.0292023
Stn_Others	M139	A5_6	450	ISMI	DAPI	0.0269275
Stn_Others	M139	A5_6	450	ISMI	DAPI	0.015583
Stn_Others	M139	A5_6	450	ISMI	DAPI	0.0142018
Stn_Others	M139	A5_6	450	ISMI	DAPI	0.0107348
Stn_Others	M139	A5_6	450	ISMI	DAPI	0.142844
Stn_Others	M139	A5_6	450	ISMI	DAPI	0.142844
Stn_Others	M139	A5_6	450	ISMI	DAPI	0.0925683
Stn_Others	M139	A5_6	450	ISMI	DAPI	0.0883674
Stn_Others	M139	A5_6	450	ISMI	DAPI	0.0858783
Stn_Others	M139	A5_6	450	ISMI	DAPI	0.0850539
Stn_Others	M139	A5_6	450	ISMI	DAPI	0.083413
Stn_Others	M139	A5_6	450	ISMI	DAPI	0.0699045
Stn_Others	M139	A5_6	450	ISMI	DAPI	0.0557796
Stn_Others	M139	A5_6	450	ISMI	DAPI	0.0522425
Stn_Others	M139	A5_6	450	ISMI	DAPI	0.0345402
Stn_Others	M139	A5_6	450	ISMI	DAPI	0.0146575
Stn_Others	M139	A5_6	450	ISMI	DAPI	0.00688325
Stn_Others	M139	A5_6	450	ISMI	DAPI	0.10644
Stn_Others	M139	A5_6	450	ISMI	DAPI	0.0951199
Stn_Others	M139	A5_6	450	ISMI	DAPI	0.0564963
Stn_Others	M139	A5_6	450	ISMI	DAPI	0.0440754
Stn_Others	M139	A5_6	450	ISMI	DAPI	0.0401688
Stn_Others	M139	A5_6	450	ISMI	DAPI	0.0370068
Stn_Others	M139	A5_6	450	ISMI	DAPI	0.0241718
Stn_Others	M139	A5_6	450	ISMI	DAPI	0.0142018
Stn_Others	M139	A5_6	450	ISMI	DAPI	0.00206591
Stn_Others	M139	A5_6	450	ISMI	DAPI	0.173179
Stn_Others	M139	A5_6	450	ISMI	DAPI	0.130316
Stn_Others	M139	A5_6	450	ISMI	DAPI	0.0809717
Stn_Others	M139	A5_6	450	ISMI	DAPI	0.0630815
Stn_Others	M139	A5_6	450	ISMI	DAPI	0.0522425
Stn_Others	M139	A5_6	450	ISMI	DAPI	0.0199744
Stn_Others	M139	A5_6	450	ISMI	DAPI	0.0170063
Stn_Others	M139	A5_6	450	ISMI	DAPI	0.0170063
Stn_Others	M139	A5_6	450	ISMI	DAPI	0.0151179
Stn_Others	M139	A5_6	450	ISMI	DAPI	0.00873806
Stn_Others	M139	A5_6	450	ISMI	DAPI	0.00424156
Stn_Others	M139	A5_6	450	ISMI	DAPI	0.162852
Stn_Others	M139	A5_6	450	ISMI	DAPI	0.042107
Stn_Others	M139	A5_6	450	ISMI	DAPI	0.0258133
Stn_Others	M139	A5_6	450	ISMI	DAPI	0.0119969
Stn_Others	M139	A5_6	450	ISMI	DAPI	0.011571
Stn_Others	M139	A5_6	450	ISMI	DAPI	0.00760745
Stn_Others	M139	A5_6	450	ISMI	DAPI	0.173179
Stn_Others	M139	A5_6	450	ISMI	DAPI	0.107328
Stn_Others	M139	A5_6	450	ISMI	DAPI	0.0699045
Stn_Others	M139	A5_6	450	ISMI	DAPI	0.0564963
Stn_Others	M139	A5_6	450	ISMI	DAPI	0.0427598
Stn_Others	M139	A5_6	450	ISMI	DAPI	0.0252621
Stn_Others	M139	A5_6	450	ISMI	DAPI	0.0209987
Stn_Others	M139	A5_6	450	ISMI	DAPI	0.015583
Stn_Others	M139	A5_6	450	ISMI	DAPI	0.142844
Stn_Others	M139	A5_6	450	ISMI	DAPI	0.0376323
Stn_Others	M139	A5_6	450	ISMI	DAPI	0.0236327
Stn_Others	M139	A5_6	450	ISMI	DAPI	0.0151179
Stn_Others	M139	A5_6	450	ISMI	DAPI	0.00991972
Stn_Others	M139	A5_6	450	ISMI	DAPI	0.00518219
Stn_Others	M139	A5_6	450	ISMI	DAPI	0.147764
Stn_Others	M139	A5_6	450	ISMI	DAPI	0.0976945
Stn_Others	M139	A5_6	450	ISMI	DAPI	0.0714521
Stn_Others	M139	A5_6	450	ISMI	DAPI	0.0660851
Stn_Others	M139	A5_6	450	ISMI	DAPI	0.0230976
Stn_Others	M139	A5_6	450	ISMI	DAPI	0.0170063
Stn_Others	M139	A5_6	450	ISMI	DAPI	0.24524
Stn_Others	M139	A5_6	450	ISMI	DAPI	0.1256
Stn_Others	M139	A5_6	450	ISMI	DAPI	0.0934163
Stn_Others	M139	A5_6	450	ISMI	DAPI	0.0883674
Stn_Others	M139	A5_6	450	ISMI	DAPI	0.00797851
Stn_Others	M139	A5_6	450	ISMI	DAPI	0.165928
Stn_Others	M139	A5_6	450	ISMI	DAPI	0.00454811
Stn_Others	M139	A5_6	450	ISMI	DAPI	0.0683681
Stn_Others	M139	A5_6	450	ISMI	DAPI	0.0615973
Stn_Others	M139	A5_6	450	ISMI	DAPI	0.0601249
Stn_Others	M139	A5_6	450	ISMI	DAPI	0.0529437
Stn_Others	M139	A5_6	450	ISMI	DAPI	0.043416
Stn_Others	M139	A5_6	450	ISMI	DAPI	0.0370068
Stn_Others	M139	A5_6	450	ISMI	DAPI	0.032131
Stn_Others	M139	A5_6	450	ISMI	DAPI	0.0280572
Stn_Others	M139	A5_6	450	ISMI	DAPI	0.0119969
Stn_Others	M139	A5_6	450	ISMI	DAPI	0.749964
Stn_Others	M139	A5_6	450	ISMI	DAPI	0.608202
Stn_Others	M139	A5_6	450	ISMI	DAPI	0.585836
Stn_Others	M139	A5_6	450	ISMI	DAPI	0.512246
Stn_Others	M139	A5_6	450	ISMI	DAPI	0.388684
Stn_Others	M139	A5_6	450	ISMI	DAPI	0.388684
Stn_Others	M139	A5_6	450	ISMI	DAPI	0.388684
Stn_Others	M139	A5_6	450	ISMI	DAPI	0.367997
Stn_Others	M139	A5_6	450	ISMI	DAPI	0.367997
Stn_Others	M139	A5_6	450	ISMI	DAPI	0.356345
Stn_Others	M139	A5_6	450	ISMI	DAPI	0.350567
Stn_Others	M139	A5_6	450	ISMI	DAPI	0.341958
Stn_Others	M139	A5_6	450	ISMI	DAPI	0.341958
Stn_Others	M139	A5_6	450	ISMI	DAPI	0.336259
Stn_Others	M139	A5_6	450	ISMI	DAPI	0.322152
Stn_Others	M139	A5_6	450	ISMI	DAPI	0.319354
Stn_Others	M139	A5_6	450	ISMI	DAPI	0.313784
Stn_Others	M139	A5_6	450	ISMI	DAPI	0.311012
Stn_Others	M139	A5_6	450	ISMI	DAPI	0.304116
Stn_Others	M139	A5_6	450	ISMI	DAPI	0.304116
Stn_Others	M139	A5_6	450	ISMI	DAPI	0.304116
Stn_Others	M139	A5_6	450	ISMI	DAPI	0.301372
Stn_Others	M139	A5_6	450	ISMI	DAPI	0.301372
Stn_Others	M139	A5_6	450	ISMI	DAPI	0.301372
Stn_Others	M139	A5_6	450	ISMI	DAPI	0.298636
Stn_Others	M139	A5_6	450	ISMI	DAPI	0.294548
Stn_Others	M139	A5_6	450	ISMI	DAPI	0.289127
Stn_Others	M139	A5_6	450	ISMI	DAPI	0.287777
Stn_Others	M139	A5_6	450	ISMI	DAPI	0.285084
Stn_Others	M139	A5_6	450	ISMI	DAPI	0.28374
Stn_Others	M139	A5_6	450	ISMI	DAPI	0.28374
Stn_Others	M139	A5_6	450	ISMI	DAPI	0.279722
Stn_Others	M139	A5_6	450	ISMI	DAPI	0.278387
Stn_Others	M139	A5_6	450	ISMI	DAPI	0.277053
Stn_Others	M139	A5_6	450	ISMI	DAPI	0.2691
Stn_Others	M139	A5_6	450	ISMI	DAPI	0.267782
Stn_Others	M139	A5_6	450	ISMI	DAPI	0.267782
Stn_Others	M139	A5_6	450	ISMI	DAPI	0.265152
Stn_Others	M139	A5_6	450	ISMI	DAPI	0.262532
Stn_Others	M139	A5_6	450	ISMI	DAPI	0.259919
Stn_Others	M139	A5_6	450	ISMI	DAPI	0.259919
Stn_Others	M139	A5_6	450	ISMI	DAPI	0.259919
Stn_Others	M139	A5_6	450	ISMI	DAPI	0.259919
Stn_Others	M139	A5_6	450	ISMI	DAPI	0.257316
Stn_Others	M139	A5_6	450	ISMI	DAPI	0.257316
Stn_Others	M139	A5_6	450	ISMI	DAPI	0.254721
Stn_Others	M139	A5_6	450	ISMI	DAPI	0.248273
Stn_Others	M139	A5_6	450	ISMI	DAPI	0.246989
Stn_Others	M139	A5_6	450	ISMI	DAPI	0.246989
Stn_Others	M139	A5_6	450	ISMI	DAPI	0.246989
Stn_Others	M139	A5_6	450	ISMI	DAPI	0.245709
Stn_Others	M139	A5_6	450	ISMI	DAPI	0.245709
Stn_Others	M139	A5_6	450	ISMI	DAPI	0.24443
Stn_Others	M139	A5_6	450	ISMI	DAPI	0.241879
Stn_Others	M139	A5_6	450	ISMI	DAPI	0.240608
Stn_Others	M139	A5_6	450	ISMI	DAPI	0.240608
Stn_Others	M139	A5_6	450	ISMI	DAPI	0.240608
Stn_Others	M139	A5_6	450	ISMI	DAPI	0.235542
Stn_Others	M139	A5_6	450	ISMI	DAPI	0.234282
Stn_Others	M139	A5_6	450	ISMI	DAPI	0.234282
Stn_Others	M139	A5_6	450	ISMI	DAPI	0.234282
Stn_Others	M139	A5_6	450	ISMI	DAPI	0.233023
Stn_Others	M139	A5_6	450	ISMI	DAPI	0.228012
Stn_Others	M139	A5_6	450	ISMI	DAPI	0.226765
Stn_Others	M139	A5_6	450	ISMI	DAPI	0.221799
Stn_Others	M139	A5_6	450	ISMI	DAPI	0.221799
Stn_Others	M139	A5_6	450	ISMI	DAPI	0.220564
Stn_Others	M139	A5_6	450	ISMI	DAPI	0.220564
Stn_Others	M139	A5_6	450	ISMI	DAPI	0.21933
Stn_Others	M139	A5_6	450	ISMI	DAPI	0.21442
Stn_Others	M139	A5_6	450	ISMI	DAPI	0.21442
Stn_Others	M139	A5_6	450	ISMI	DAPI	0.213198
Stn_Others	M139	A5_6	450	ISMI	DAPI	0.213198
Stn_Others	M139	A5_6	450	ISMI	DAPI	0.210762
Stn_Others	M139	A5_6	450	ISMI	DAPI	0.209547
Stn_Others	M139	A5_6	450	ISMI	DAPI	0.209547
Stn_Others	M139	A5_6	450	ISMI	DAPI	0.208335
Stn_Others	M139	A5_6	450	ISMI	DAPI	0.208335
Stn_Others	M139	A5_6	450	ISMI	DAPI	0.208335
Stn_Others	M139	A5_6	450	ISMI	DAPI	0.208335
Stn_Others	M139	A5_6	450	ISMI	DAPI	0.205917
Stn_Others	M139	A5_6	450	ISMI	DAPI	0.204711
Stn_Others	M139	A5_6	450	ISMI	DAPI	0.204711
Stn_Others	M139	A5_6	450	ISMI	DAPI	0.204711
Stn_Others	M139	A5_6	450	ISMI	DAPI	0.201109
Stn_Others	M139	A5_6	450	ISMI	DAPI	0.201109
Stn_Others	M139	A5_6	450	ISMI	DAPI	0.201109
Stn_Others	M139	A5_6	450	ISMI	DAPI	0.201109
Stn_Others	M139	A5_6	450	ISMI	DAPI	0.201109
Stn_Others	M139	A5_6	450	ISMI	DAPI	0.199914
Stn_Others	M139	A5_6	450	ISMI	DAPI	0.199914
Stn_Others	M139	A5_6	450	ISMI	DAPI	0.19872
Stn_Others	M139	A5_6	450	ISMI	DAPI	0.19872
Stn_Others	M139	A5_6	450	ISMI	DAPI	0.19872
Stn_Others	M139	A5_6	450	ISMI	DAPI	0.195154
Stn_Others	M139	A5_6	450	ISMI	DAPI	0.19397
Stn_Others	M139	A5_6	450	ISMI	DAPI	0.19397
Stn_Others	M139	A5_6	450	ISMI	DAPI	0.191609
Stn_Others	M139	A5_6	450	ISMI	DAPI	0.191609
Stn_Others	M139	A5_6	450	ISMI	DAPI	0.189258
Stn_Others	M139	A5_6	450	ISMI	DAPI	0.189258
Stn_Others	M139	A5_6	450	ISMI	DAPI	0.188086
Stn_Others	M139	A5_6	450	ISMI	DAPI	0.188086
Stn_Others	M139	A5_6	450	ISMI	DAPI	0.186917
Stn_Others	M139	A5_6	450	ISMI	DAPI	0.18575
Stn_Others	M139	A5_6	450	ISMI	DAPI	0.183423
Stn_Others	M139	A5_6	450	ISMI	DAPI	0.183423
Stn_Others	M139	A5_6	450	ISMI	DAPI	0.182263
Stn_Others	M139	A5_6	450	ISMI	DAPI	0.182263
Stn_Others	M139	A5_6	450	ISMI	DAPI	0.181106
Stn_Others	M139	A5_6	450	ISMI	DAPI	0.179952
Stn_Others	M139	A5_6	450	ISMI	DAPI	0.178799
Stn_Others	M139	A5_6	450	ISMI	DAPI	0.178799
Stn_Others	M139	A5_6	450	ISMI	DAPI	0.177649
Stn_Others	M139	A5_6	450	ISMI	DAPI	0.177649
Stn_Others	M139	A5_6	450	ISMI	DAPI	0.175357
Stn_Others	M139	A5_6	450	ISMI	DAPI	0.174215
Stn_Others	M139	A5_6	450	ISMI	DAPI	0.174215
Stn_Others	M139	A5_6	450	ISMI	DAPI	0.173075
Stn_Others	M139	A5_6	450	ISMI	DAPI	0.171937
Stn_Others	M139	A5_6	450	ISMI	DAPI	0.171937
Stn_Others	M139	A5_6	450	ISMI	DAPI	0.170803
Stn_Others	M139	A5_6	450	ISMI	DAPI	0.170803
Stn_Others	M139	A5_6	450	ISMI	DAPI	0.16854
Stn_Others	M139	A5_6	450	ISMI	DAPI	0.167413
Stn_Others	M139	A5_6	450	ISMI	DAPI	0.167413
Stn_Others	M139	A5_6	450	ISMI	DAPI	0.167413
Stn_Others	M139	A5_6	450	ISMI	DAPI	0.167413
Stn_Others	M139	A5_6	450	ISMI	DAPI	0.167413
Stn_Others	M139	A5_6	450	ISMI	DAPI	0.165166
Stn_Others	M139	A5_6	450	ISMI	DAPI	0.164046
Stn_Others	M139	A5_6	450	ISMI	DAPI	0.162929
Stn_Others	M139	A5_6	450	ISMI	DAPI	0.159592
Stn_Others	M139	A5_6	450	ISMI	DAPI	0.159592
Stn_Others	M139	A5_6	450	ISMI	DAPI	0.159592
Stn_Others	M139	A5_6	450	ISMI	DAPI	0.157381
Stn_Others	M139	A5_6	450	ISMI	DAPI	0.157381
Stn_Others	M139	A5_6	450	ISMI	DAPI	0.157381
Stn_Others	M139	A5_6	450	ISMI	DAPI	0.15518
Stn_Others	M139	A5_6	450	ISMI	DAPI	0.154083
Stn_Others	M139	A5_6	450	ISMI	DAPI	0.152989
Stn_Others	M139	A5_6	450	ISMI	DAPI	0.151898
Stn_Others	M139	A5_6	450	ISMI	DAPI	0.151898
Stn_Others	M139	A5_6	450	ISMI	DAPI	0.150809
Stn_Others	M139	A5_6	450	ISMI	DAPI	0.150809
Stn_Others	M139	A5_6	450	ISMI	DAPI	0.149723
Stn_Others	M139	A5_6	450	ISMI	DAPI	0.149723
Stn_Others	M139	A5_6	450	ISMI	DAPI	0.149723
Stn_Others	M139	A5_6	450	ISMI	DAPI	0.148639
Stn_Others	M139	A5_6	450	ISMI	DAPI	0.148639
Stn_Others	M139	A5_6	450	ISMI	DAPI	0.148639
Stn_Others	M139	A5_6	450	ISMI	DAPI	0.147558
Stn_Others	M139	A5_6	450	ISMI	DAPI	0.14648
Stn_Others	M139	A5_6	450	ISMI	DAPI	0.14648
Stn_Others	M139	A5_6	450	ISMI	DAPI	0.145404
Stn_Others	M139	A5_6	450	ISMI	DAPI	0.145404
Stn_Others	M139	A5_6	450	ISMI	DAPI	0.144331
Stn_Others	M139	A5_6	450	ISMI	DAPI	0.144331
Stn_Others	M139	A5_6	450	ISMI	DAPI	0.144331
Stn_Others	M139	A5_6	450	ISMI	DAPI	0.144331
Stn_Others	M139	A5_6	450	ISMI	DAPI	0.144331
Stn_Others	M139	A5_6	450	ISMI	DAPI	0.144331
Stn_Others	M139	A5_6	450	ISMI	DAPI	0.14326
Stn_Others	M139	A5_6	450	ISMI	DAPI	0.14326
Stn_Others	M139	A5_6	450	ISMI	DAPI	0.141127
Stn_Others	M139	A5_6	450	ISMI	DAPI	0.141127
Stn_Others	M139	A5_6	450	ISMI	DAPI	0.141127
Stn_Others	M139	A5_6	450	ISMI	DAPI	0.141127
Stn_Others	M139	A5_6	450	ISMI	DAPI	0.140065
Stn_Others	M139	A5_6	450	ISMI	DAPI	0.139005
Stn_Others	M139	A5_6	450	ISMI	DAPI	0.137948
Stn_Others	M139	A5_6	450	ISMI	DAPI	0.137948
Stn_Others	M139	A5_6	450	ISMI	DAPI	0.137948
Stn_Others	M139	A5_6	450	ISMI	DAPI	0.137948
Stn_Others	M139	A5_6	450	ISMI	DAPI	0.137948
Stn_Others	M139	A5_6	450	ISMI	DAPI	0.137948
Stn_Others	M139	A5_6	450	ISMI	DAPI	0.136894
Stn_Others	M139	A5_6	450	ISMI	DAPI	0.136894
Stn_Others	M139	A5_6	450	ISMI	DAPI	0.135842
Stn_Others	M139	A5_6	450	ISMI	DAPI	0.135842
Stn_Others	M139	A5_6	450	ISMI	DAPI	0.134793
Stn_Others	M139	A5_6	450	ISMI	DAPI	0.134793
Stn_Others	M139	A5_6	450	ISMI	DAPI	0.134793
Stn_Others	M139	A5_6	450	ISMI	DAPI	0.133747
Stn_Others	M139	A5_6	450	ISMI	DAPI	0.133747
Stn_Others	M139	A5_6	450	ISMI	DAPI	0.133747
Stn_Others	M139	A5_6	450	ISMI	DAPI	0.133747
Stn_Others	M139	A5_6	450	ISMI	DAPI	0.132703
Stn_Others	M139	A5_6	450	ISMI	DAPI	0.132703
Stn_Others	M139	A5_6	450	ISMI	DAPI	0.132703
Stn_Others	M139	A5_6	450	ISMI	DAPI	0.132703
Stn_Others	M139	A5_6	450	ISMI	DAPI	0.132703
Stn_Others	M139	A5_6	450	ISMI	DAPI	0.130624
Stn_Others	M139	A5_6	450	ISMI	DAPI	0.130624
Stn_Others	M139	A5_6	450	ISMI	DAPI	0.130624
Stn_Others	M139	A5_6	450	ISMI	DAPI	0.130624
Stn_Others	M139	A5_6	450	ISMI	DAPI	0.129589
Stn_Others	M139	A5_6	450	ISMI	DAPI	0.129589
Stn_Others	M139	A5_6	450	ISMI	DAPI	0.129589
Stn_Others	M139	A5_6	450	ISMI	DAPI	0.129589
Stn_Others	M139	A5_6	450	ISMI	DAPI	0.129589
Stn_Others	M139	A5_6	450	ISMI	DAPI	0.129589
Stn_Others	M139	A5_6	450	ISMI	DAPI	0.128557
Stn_Others	M139	A5_6	450	ISMI	DAPI	0.128557
Stn_Others	M139	A5_6	450	ISMI	DAPI	0.127527
Stn_Others	M139	A5_6	450	ISMI	DAPI	0.127527
Stn_Others	M139	A5_6	450	ISMI	DAPI	0.1265
Stn_Others	M139	A5_6	450	ISMI	DAPI	0.1265
Stn_Others	M139	A5_6	450	ISMI	DAPI	0.1265
Stn_Others	M139	A5_6	450	ISMI	DAPI	0.1265
Stn_Others	M139	A5_6	450	ISMI	DAPI	0.1265
Stn_Others	M139	A5_6	450	ISMI	DAPI	0.1265
Stn_Others	M139	A5_6	450	ISMI	DAPI	0.125475
Stn_Others	M139	A5_6	450	ISMI	DAPI	0.125475
Stn_Others	M139	A5_6	450	ISMI	DAPI	0.125475
Stn_Others	M139	A5_6	450	ISMI	DAPI	0.125475
Stn_Others	M139	A5_6	450	ISMI	DAPI	0.124454
Stn_Others	M139	A5_6	450	ISMI	DAPI	0.124454
Stn_Others	M139	A5_6	450	ISMI	DAPI	0.123435
Stn_Others	M139	A5_6	450	ISMI	DAPI	0.122419
Stn_Others	M139	A5_6	450	ISMI	DAPI	0.122419
Stn_Others	M139	A5_6	450	ISMI	DAPI	0.122419
Stn_Others	M139	A5_6	450	ISMI	DAPI	0.122419
Stn_Others	M139	A5_6	450	ISMI	DAPI	0.121406
Stn_Others	M139	A5_6	450	ISMI	DAPI	0.121406
Stn_Others	M139	A5_6	450	ISMI	DAPI	0.121406
Stn_Others	M139	A5_6	450	ISMI	DAPI	0.121406
Stn_Others	M139	A5_6	450	ISMI	DAPI	0.121406
Stn_Others	M139	A5_6	450	ISMI	DAPI	0.121406
Stn_Others	M139	A5_6	450	ISMI	DAPI	0.120396
Stn_Others	M139	A5_6	450	ISMI	DAPI	0.120396
Stn_Others	M139	A5_6	450	ISMI	DAPI	0.120396
Stn_Others	M139	A5_6	450	ISMI	DAPI	0.119388
Stn_Others	M139	A5_6	450	ISMI	DAPI	0.119388
Stn_Others	M139	A5_6	450	ISMI	DAPI	0.119388
Stn_Others	M139	A5_6	450	ISMI	DAPI	0.118384
Stn_Others	M139	A5_6	450	ISMI	DAPI	0.118384
Stn_Others	M139	A5_6	450	ISMI	DAPI	0.118384
Stn_Others	M139	A5_6	450	ISMI	DAPI	0.118384
Stn_Others	M139	A5_6	450	ISMI	DAPI	0.116383
Stn_Others	M139	A5_6	450	ISMI	DAPI	0.116383
Stn_Others	M139	A5_6	450	ISMI	DAPI	0.115387
Stn_Others	M139	A5_6	450	ISMI	DAPI	0.115387
Stn_Others	M139	A5_6	450	ISMI	DAPI	0.115387
Stn_Others	M139	A5_6	450	ISMI	DAPI	0.115387
Stn_Others	M139	A5_6	450	ISMI	DAPI	0.114393
Stn_Others	M139	A5_6	450	ISMI	DAPI	0.114393
Stn_Others	M139	A5_6	450	ISMI	DAPI	0.113403
Stn_Others	M139	A5_6	450	ISMI	DAPI	0.113403
Stn_Others	M139	A5_6	450	ISMI	DAPI	0.113403
Stn_Others	M139	A5_6	450	ISMI	DAPI	0.112415
Stn_Others	M139	A5_6	450	ISMI	DAPI	0.112415
Stn_Others	M139	A5_6	450	ISMI	DAPI	0.111431
Stn_Others	M139	A5_6	450	ISMI	DAPI	0.110449
Stn_Others	M139	A5_6	450	ISMI	DAPI	0.110449
Stn_Others	M139	A5_6	450	ISMI	DAPI	0.110449
Stn_Others	M139	A5_6	450	ISMI	DAPI	0.107521
Stn_Others	M139	A5_6	450	ISMI	DAPI	0.106551
Stn_Others	M139	A5_6	450	ISMI	DAPI	0.106551
Stn_Others	M139	A5_6	450	ISMI	DAPI	0.106551
Stn_Others	M139	A5_6	450	ISMI	DAPI	0.105584
Stn_Others	M139	A5_6	450	ISMI	DAPI	0.105584
Stn_Others	M139	A5_6	450	ISMI	DAPI	0.10462
Stn_Others	M139	A5_6	450	ISMI	DAPI	0.10462
Stn_Others	M139	A5_6	450	ISMI	DAPI	0.10462
Stn_Others	M139	A5_6	450	ISMI	DAPI	0.10462
Stn_Others	M139	A5_6	450	ISMI	DAPI	0.1027
Stn_Others	M139	A5_6	450	ISMI	DAPI	0.101745
Stn_Others	M139	A5_6	450	ISMI	DAPI	0.101745
Stn_Others	M139	A5_6	450	ISMI	DAPI	0.100792
Stn_Others	M139	A5_6	450	ISMI	DAPI	0.100792
Stn_Others	M139	A5_6	450	ISMI	DAPI	0.0998429
Stn_Others	M139	A5_6	450	ISMI	DAPI	0.0998429
Stn_Others	M139	A5_6	450	ISMI	DAPI	0.0998429
Stn_Others	M139	A5_6	450	ISMI	DAPI	0.0988966
Stn_Others	M139	A5_6	450	ISMI	DAPI	0.0988966
Stn_Others	M139	A5_6	450	ISMI	DAPI	0.0979532
Stn_Others	M139	A5_6	450	ISMI	DAPI	0.0979532
Stn_Others	M139	A5_6	450	ISMI	DAPI	0.0970128
Stn_Others	M139	A5_6	450	ISMI	DAPI	0.0970128
Stn_Others	M139	A5_6	450	ISMI	DAPI	0.0970128
Stn_Others	M139	A5_6	450	ISMI	DAPI	0.0970128
Stn_Others	M139	A5_6	450	ISMI	DAPI	0.0960755
Stn_Others	M139	A5_6	450	ISMI	DAPI	0.0951412
Stn_Others	M139	A5_6	450	ISMI	DAPI	0.0951412
Stn_Others	M139	A5_6	450	ISMI	DAPI	0.0951412
Stn_Others	M139	A5_6	450	ISMI	DAPI	0.09421
Stn_Others	M139	A5_6	450	ISMI	DAPI	0.0932818
Stn_Others	M139	A5_6	450	ISMI	DAPI	0.0932818
Stn_Others	M139	A5_6	450	ISMI	DAPI	0.0923567
Stn_Others	M139	A5_6	450	ISMI	DAPI	0.0923567
Stn_Others	M139	A5_6	450	ISMI	DAPI	0.0923567
Stn_Others	M139	A5_6	450	ISMI	DAPI	0.0923567
Stn_Others	M139	A5_6	450	ISMI	DAPI	0.0914347
Stn_Others	M139	A5_6	450	ISMI	DAPI	0.0914347
Stn_Others	M139	A5_6	450	ISMI	DAPI	0.0914347
Stn_Others	M139	A5_6	450	ISMI	DAPI	0.0905158
Stn_Others	M139	A5_6	450	ISMI	DAPI	0.0905158
Stn_Others	M139	A5_6	450	ISMI	DAPI	0.0905158
Stn_Others	M139	A5_6	450	ISMI	DAPI	0.0905158
Stn_Others	M139	A5_6	450	ISMI	DAPI	0.0895999
Stn_Others	M139	A5_6	450	ISMI	DAPI	0.0895999
Stn_Others	M139	A5_6	450	ISMI	DAPI	0.0886872
Stn_Others	M139	A5_6	450	ISMI	DAPI	0.0886872
Stn_Others	M139	A5_6	450	ISMI	DAPI	0.0877776
Stn_Others	M139	A5_6	450	ISMI	DAPI	0.0877776
Stn_Others	M139	A5_6	450	ISMI	DAPI	0.0877776
Stn_Others	M139	A5_6	450	ISMI	DAPI	0.0868711
Stn_Others	M139	A5_6	450	ISMI	DAPI	0.0868711
Stn_Others	M139	A5_6	450	ISMI	DAPI	0.0859678
Stn_Others	M139	A5_6	450	ISMI	DAPI	0.0850676
Stn_Others	M139	A5_6	450	ISMI	DAPI	0.0850676
Stn_Others	M139	A5_6	450	ISMI	DAPI	0.0850676
Stn_Others	M139	A5_6	450	ISMI	DAPI	0.0850676
Stn_Others	M139	A5_6	450	ISMI	DAPI	0.0841706
Stn_Others	M139	A5_6	450	ISMI	DAPI	0.0841706
Stn_Others	M139	A5_6	450	ISMI	DAPI	0.0841706
Stn_Others	M139	A5_6	450	ISMI	DAPI	0.0841706
Stn_Others	M139	A5_6	450	ISMI	DAPI	0.0841706
Stn_Others	M139	A5_6	450	ISMI	DAPI	0.0841706
Stn_Others	M139	A5_6	450	ISMI	DAPI	0.0832767
Stn_Others	M139	A5_6	450	ISMI	DAPI	0.0832767
Stn_Others	M139	A5_6	450	ISMI	DAPI	0.0832767
Stn_Others	M139	A5_6	450	ISMI	DAPI	0.0823861
Stn_Others	M139	A5_6	450	ISMI	DAPI	0.0823861
Stn_Others	M139	A5_6	450	ISMI	DAPI	0.0823861
Stn_Others	M139	A5_6	450	ISMI	DAPI	0.0823861
Stn_Others	M139	A5_6	450	ISMI	DAPI	0.0814986
Stn_Others	M139	A5_6	450	ISMI	DAPI	0.0814986
Stn_Others	M139	A5_6	450	ISMI	DAPI	0.0814986
Stn_Others	M139	A5_6	450	ISMI	DAPI	0.0806144
Stn_Others	M139	A5_6	450	ISMI	DAPI	0.0806144
Stn_Others	M139	A5_6	450	ISMI	DAPI	0.0806144
Stn_Others	M139	A5_6	450	ISMI	DAPI	0.0806144
Stn_Others	M139	A5_6	450	ISMI	DAPI	0.0797334
Stn_Others	M139	A5_6	450	ISMI	DAPI	0.0797334
Stn_Others	M139	A5_6	450	ISMI	DAPI	0.0797334
Stn_Others	M139	A5_6	450	ISMI	DAPI	0.0797334
Stn_Others	M139	A5_6	450	ISMI	DAPI	0.0788556
Stn_Others	M139	A5_6	450	ISMI	DAPI	0.077981
Stn_Others	M139	A5_6	450	ISMI	DAPI	0.077981
Stn_Others	M139	A5_6	450	ISMI	DAPI	0.077981
Stn_Others	M139	A5_6	450	ISMI	DAPI	0.077981
Stn_Others	M139	A5_6	450	ISMI	DAPI	0.077981
Stn_Others	M139	A5_6	450	ISMI	DAPI	0.0771097
Stn_Others	M139	A5_6	450	ISMI	DAPI	0.0771097
Stn_Others	M139	A5_6	450	ISMI	DAPI	0.0771097
Stn_Others	M139	A5_6	450	ISMI	DAPI	0.0771097
Stn_Others	M139	A5_6	450	ISMI	DAPI	0.0771097
Stn_Others	M139	A5_6	450	ISMI	DAPI	0.0762417
Stn_Others	M139	A5_6	450	ISMI	DAPI	0.0762417
Stn_Others	M139	A5_6	450	ISMI	DAPI	0.0762417
Stn_Others	M139	A5_6	450	ISMI	DAPI	0.0762417
Stn_Others	M139	A5_6	450	ISMI	DAPI	0.0762417
Stn_Others	M139	A5_6	450	ISMI	DAPI	0.075377
Stn_Others	M139	A5_6	450	ISMI	DAPI	0.075377
Stn_Others	M139	A5_6	450	ISMI	DAPI	0.075377
Stn_Others	M139	A5_6	450	ISMI	DAPI	0.075377
Stn_Others	M139	A5_6	450	ISMI	DAPI	0.0745155
Stn_Others	M139	A5_6	450	ISMI	DAPI	0.0745155
Stn_Others	M139	A5_6	450	ISMI	DAPI	0.0745155
Stn_Others	M139	A5_6	450	ISMI	DAPI	0.0745155
Stn_Others	M139	A5_6	450	ISMI	DAPI	0.0736574
Stn_Others	M139	A5_6	450	ISMI	DAPI	0.0736574
Stn_Others	M139	A5_6	450	ISMI	DAPI	0.0736574
Stn_Others	M139	A5_6	450	ISMI	DAPI	0.0736574
Stn_Others	M139	A5_6	450	ISMI	DAPI	0.0728026
Stn_Others	M139	A5_6	450	ISMI	DAPI	0.0728026
Stn_Others	M139	A5_6	450	ISMI	DAPI	0.0719511
Stn_Others	M139	A5_6	450	ISMI	DAPI	0.0719511
Stn_Others	M139	A5_6	450	ISMI	DAPI	0.0719511
Stn_Others	M139	A5_6	450	ISMI	DAPI	0.0719511
Stn_Others	M139	A5_6	450	ISMI	DAPI	0.0719511
Stn_Others	M139	A5_6	450	ISMI	DAPI	0.0719511
Stn_Others	M139	A5_6	450	ISMI	DAPI	0.0719511
Stn_Others	M139	A5_6	450	ISMI	DAPI	0.0719511
Stn_Others	M139	A5_6	450	ISMI	DAPI	0.0711029
Stn_Others	M139	A5_6	450	ISMI	DAPI	0.0711029
Stn_Others	M139	A5_6	450	ISMI	DAPI	0.0711029
Stn_Others	M139	A5_6	450	ISMI	DAPI	0.0702582
Stn_Others	M139	A5_6	450	ISMI	DAPI	0.0702582
Stn_Others	M139	A5_6	450	ISMI	DAPI	0.0694167
Stn_Others	M139	A5_6	450	ISMI	DAPI	0.0694167
Stn_Others	M139	A5_6	450	ISMI	DAPI	0.0694167
Stn_Others	M139	A5_6	450	ISMI	DAPI	0.0685787
Stn_Others	M139	A5_6	450	ISMI	DAPI	0.0677441
Stn_Others	M139	A5_6	450	ISMI	DAPI	0.0669129
Stn_Others	M139	A5_6	450	ISMI	DAPI	0.0669129
Stn_Others	M139	A5_6	450	ISMI	DAPI	0.0660851
Stn_Others	M139	A5_6	450	ISMI	DAPI	0.0660851
Stn_Others	M139	A5_6	450	ISMI	DAPI	0.0660851
Stn_Others	M139	A5_6	450	ISMI	DAPI	0.0660851
Stn_Others	M139	A5_6	450	ISMI	DAPI	0.0660851
Stn_Others	M139	A5_6	450	ISMI	DAPI	0.0652608
Stn_Others	M139	A5_6	450	ISMI	DAPI	0.0652608
Stn_Others	M139	A5_6	450	ISMI	DAPI	0.0652608
Stn_Others	M139	A5_6	450	ISMI	DAPI	0.0652608
Stn_Others	M139	A5_6	450	ISMI	DAPI	0.0652608
Stn_Others	M139	A5_6	450	ISMI	DAPI	0.0652608
Stn_Others	M139	A5_6	450	ISMI	DAPI	0.0644399
Stn_Others	M139	A5_6	450	ISMI	DAPI	0.0644399
Stn_Others	M139	A5_6	450	ISMI	DAPI	0.0636225
Stn_Others	M139	A5_6	450	ISMI	DAPI	0.0636225
Stn_Others	M139	A5_6	450	ISMI	DAPI	0.0636225
Stn_Others	M139	A5_6	450	ISMI	DAPI	0.0636225
Stn_Others	M139	A5_6	450	ISMI	DAPI	0.0628085
Stn_Others	M139	A5_6	450	ISMI	DAPI	0.0628085
Stn_Others	M139	A5_6	450	ISMI	DAPI	0.0628085
Stn_Others	M139	A5_6	450	ISMI	DAPI	0.0628085
Stn_Others	M139	A5_6	450	ISMI	DAPI	0.0628085
Stn_Others	M139	A5_6	450	ISMI	DAPI	0.0619981
Stn_Others	M139	A5_6	450	ISMI	DAPI	0.0619981
Stn_Others	M139	A5_6	450	ISMI	DAPI	0.0619981
Stn_Others	M139	A5_6	450	ISMI	DAPI	0.0619981
Stn_Others	M139	A5_6	450	ISMI	DAPI	0.0619981
Stn_Others	M139	A5_6	450	ISMI	DAPI	0.0611912
Stn_Others	M139	A5_6	450	ISMI	DAPI	0.0611912
Stn_Others	M139	A5_6	450	ISMI	DAPI	0.0603878
Stn_Others	M139	A5_6	450	ISMI	DAPI	0.0603878
Stn_Others	M139	A5_6	450	ISMI	DAPI	0.059588
Stn_Others	M139	A5_6	450	ISMI	DAPI	0.059588
Stn_Others	M139	A5_6	450	ISMI	DAPI	0.059588
Stn_Others	M139	A5_6	450	ISMI	DAPI	0.0587917
Stn_Others	M139	A5_6	450	ISMI	DAPI	0.057999
Stn_Others	M139	A5_6	450	ISMI	DAPI	0.057999
Stn_Others	M139	A5_6	450	ISMI	DAPI	0.0572099
Stn_Others	M139	A5_6	450	ISMI	DAPI	0.0564245
Stn_Others	M139	A5_6	450	ISMI	DAPI	0.0564245
Stn_Others	M139	A5_6	450	ISMI	DAPI	0.0556426
Stn_Others	M139	A5_6	450	ISMI	DAPI	0.0556426
Stn_Others	M139	A5_6	450	ISMI	DAPI	0.0548644
Stn_Others	M139	A5_6	450	ISMI	DAPI	0.0548644
Stn_Others	M139	A5_6	450	ISMI	DAPI	0.0540898
Stn_Others	M139	A5_6	450	ISMI	DAPI	0.0525518
Stn_Others	M139	A5_6	450	ISMI	DAPI	0.0525518
Stn_Others	M139	A5_6	450	ISMI	DAPI	0.0525518
Stn_Others	M139	A5_6	450	ISMI	DAPI	0.0525518
Stn_Others	M139	A5_6	450	ISMI	DAPI	0.0525518
Stn_Others	M139	A5_6	450	ISMI	DAPI	0.0525518
Stn_Others	M139	A5_6	450	ISMI	DAPI	0.0517883
Stn_Others	M139	A5_6	450	ISMI	DAPI	0.0517883
Stn_Others	M139	A5_6	450	ISMI	DAPI	0.0517883
Stn_Others	M139	A5_6	450	ISMI	DAPI	0.0510286
Stn_Others	M139	A5_6	450	ISMI	DAPI	0.0510286
Stn_Others	M139	A5_6	450	ISMI	DAPI	0.0510286
Stn_Others	M139	A5_6	450	ISMI	DAPI	0.0510286
Stn_Others	M139	A5_6	450	ISMI	DAPI	0.0502726
Stn_Others	M139	A5_6	450	ISMI	DAPI	0.0502726
Stn_Others	M139	A5_6	450	ISMI	DAPI	0.0502726
Stn_Others	M139	A5_6	450	ISMI	DAPI	0.0502726
Stn_Others	M139	A5_6	450	ISMI	DAPI	0.0502726
Stn_Others	M139	A5_6	450	ISMI	DAPI	0.0502726
Stn_Others	M139	A5_6	450	ISMI	DAPI	0.0495204
Stn_Others	M139	A5_6	450	ISMI	DAPI	0.0495204
Stn_Others	M139	A5_6	450	ISMI	DAPI	0.0495204
Stn_Others	M139	A5_6	450	ISMI	DAPI	0.0495204
Stn_Others	M139	A5_6	450	ISMI	DAPI	0.0495204
Stn_Others	M139	A5_6	450	ISMI	DAPI	0.0495204
Stn_Others	M139	A5_6	450	ISMI	DAPI	0.048772
Stn_Others	M139	A5_6	450	ISMI	DAPI	0.048772
Stn_Others	M139	A5_6	450	ISMI	DAPI	0.0480274
Stn_Others	M139	A5_6	450	ISMI	DAPI	0.0480274
Stn_Others	M139	A5_6	450	ISMI	DAPI	0.0472866
Stn_Others	M139	A5_6	450	ISMI	DAPI	0.0472866
Stn_Others	M139	A5_6	450	ISMI	DAPI	0.0458167
Stn_Others	M139	A5_6	450	ISMI	DAPI	0.0458167
Stn_Others	M139	A5_6	450	ISMI	DAPI	0.0458167
Stn_Others	M139	A5_6	450	ISMI	DAPI	0.0458167
Stn_Others	M139	A5_6	450	ISMI	DAPI	0.0458167
Stn_Others	M139	A5_6	450	ISMI	DAPI	0.0450875
Stn_Others	M139	A5_6	450	ISMI	DAPI	0.0450875
Stn_Others	M139	A5_6	450	ISMI	DAPI	0.0450875
Stn_Others	M139	A5_6	450	ISMI	DAPI	0.0443622
Stn_Others	M139	A5_6	450	ISMI	DAPI	0.0443622
Stn_Others	M139	A5_6	450	ISMI	DAPI	0.0443622
Stn_Others	M139	A5_6	450	ISMI	DAPI	0.0436409
Stn_Others	M139	A5_6	450	ISMI	DAPI	0.0436409
Stn_Others	M139	A5_6	450	ISMI	DAPI	0.0429235
Stn_Others	M139	A5_6	450	ISMI	DAPI	0.0429235
Stn_Others	M139	A5_6	450	ISMI	DAPI	0.0429235
Stn_Others	M139	A5_6	450	ISMI	DAPI	0.0422101
Stn_Others	M139	A5_6	450	ISMI	DAPI	0.0422101
Stn_Others	M139	A5_6	450	ISMI	DAPI	0.0422101
Stn_Others	M139	A5_6	450	ISMI	DAPI	0.0422101
Stn_Others	M139	A5_6	450	ISMI	DAPI	0.0415007
Stn_Others	M139	A5_6	450	ISMI	DAPI	0.0415007
Stn_Others	M139	A5_6	450	ISMI	DAPI	0.0415007
Stn_Others	M139	A5_6	450	ISMI	DAPI	0.0415007
Stn_Others	M139	A5_6	450	ISMI	DAPI	0.0407953
Stn_Others	M139	A5_6	450	ISMI	DAPI	0.040094
Stn_Others	M139	A5_6	450	ISMI	DAPI	0.0393967
Stn_Others	M139	A5_6	450	ISMI	DAPI	0.0393967
Stn_Others	M139	A5_6	450	ISMI	DAPI	0.0393967
Stn_Others	M139	A5_6	450	ISMI	DAPI	0.0393967
Stn_Others	M139	A5_6	450	ISMI	DAPI	0.0393967
Stn_Others	M139	A5_6	450	ISMI	DAPI	0.0393967
Stn_Others	M139	A5_6	450	ISMI	DAPI	0.0387035
Stn_Others	M139	A5_6	450	ISMI	DAPI	0.0387035
Stn_Others	M139	A5_6	450	ISMI	DAPI	0.0387035
Stn_Others	M139	A5_6	450	ISMI	DAPI	0.0380145
Stn_Others	M139	A5_6	450	ISMI	DAPI	0.0380145
Stn_Others	M139	A5_6	450	ISMI	DAPI	0.0380145
Stn_Others	M139	A5_6	450	ISMI	DAPI	0.0380145
Stn_Others	M139	A5_6	450	ISMI	DAPI	0.0380145
Stn_Others	M139	A5_6	450	ISMI	DAPI	0.0373295
Stn_Others	M139	A5_6	450	ISMI	DAPI	0.0373295
Stn_Others	M139	A5_6	450	ISMI	DAPI	0.0373295
Stn_Others	M139	A5_6	450	ISMI	DAPI	0.0373295
Stn_Others	M139	A5_6	450	ISMI	DAPI	0.0373295
Stn_Others	M139	A5_6	450	ISMI	DAPI	0.0373295
Stn_Others	M139	A5_6	450	ISMI	DAPI	0.0373295
Stn_Others	M139	A5_6	450	ISMI	DAPI	0.0373295
Stn_Others	M139	A5_6	450	ISMI	DAPI	0.0366488
Stn_Others	M139	A5_6	450	ISMI	DAPI	0.0366488
Stn_Others	M139	A5_6	450	ISMI	DAPI	0.0366488
Stn_Others	M139	A5_6	450	ISMI	DAPI	0.0366488
Stn_Others	M139	A5_6	450	ISMI	DAPI	0.0359722
Stn_Others	M139	A5_6	450	ISMI	DAPI	0.0359722
Stn_Others	M139	A5_6	450	ISMI	DAPI	0.0359722
Stn_Others	M139	A5_6	450	ISMI	DAPI	0.0359722
Stn_Others	M139	A5_6	450	ISMI	DAPI	0.0359722
Stn_Others	M139	A5_6	450	ISMI	DAPI	0.0352998
Stn_Others	M139	A5_6	450	ISMI	DAPI	0.0352998
Stn_Others	M139	A5_6	450	ISMI	DAPI	0.0352998
Stn_Others	M139	A5_6	450	ISMI	DAPI	0.0339678
Stn_Others	M139	A5_6	450	ISMI	DAPI	0.0339678
Stn_Others	M139	A5_6	450	ISMI	DAPI	0.0339678
Stn_Others	M139	A5_6	450	ISMI	DAPI	0.0339678
Stn_Others	M139	A5_6	450	ISMI	DAPI	0.0339678
Stn_Others	M139	A5_6	450	ISMI	DAPI	0.0339678
Stn_Others	M139	A5_6	450	ISMI	DAPI	0.0333083
Stn_Others	M139	A5_6	450	ISMI	DAPI	0.0333083
Stn_Others	M139	A5_6	450	ISMI	DAPI	0.0333083
Stn_Others	M139	A5_6	450	ISMI	DAPI	0.032653
Stn_Others	M139	A5_6	450	ISMI	DAPI	0.032653
Stn_Others	M139	A5_6	450	ISMI	DAPI	0.032653
Stn_Others	M139	A5_6	450	ISMI	DAPI	0.032653
Stn_Others	M139	A5_6	450	ISMI	DAPI	0.0320022
Stn_Others	M139	A5_6	450	ISMI	DAPI	0.0320022
Stn_Others	M139	A5_6	450	ISMI	DAPI	0.0320022
Stn_Others	M139	A5_6	450	ISMI	DAPI	0.0313557
Stn_Others	M139	A5_6	450	ISMI	DAPI	0.0313557
Stn_Others	M139	A5_6	450	ISMI	DAPI	0.0313557
Stn_Others	M139	A5_6	450	ISMI	DAPI	0.0313557
Stn_Others	M139	A5_6	450	ISMI	DAPI	0.0313557
Stn_Others	M139	A5_6	450	ISMI	DAPI	0.0307136
Stn_Others	M139	A5_6	450	ISMI	DAPI	0.0307136
Stn_Others	M139	A5_6	450	ISMI	DAPI	0.0307136
Stn_Others	M139	A5_6	450	ISMI	DAPI	0.0307136
Stn_Others	M139	A5_6	450	ISMI	DAPI	0.0307136
Stn_Others	M139	A5_6	450	ISMI	DAPI	0.0300759
Stn_Others	M139	A5_6	450	ISMI	DAPI	0.0300759
Stn_Others	M139	A5_6	450	ISMI	DAPI	0.0300759
Stn_Others	M139	A5_6	450	ISMI	DAPI	0.0300759
Stn_Others	M139	A5_6	450	ISMI	DAPI	0.0300759
Stn_Others	M139	A5_6	450	ISMI	DAPI	0.0294428
Stn_Others	M139	A5_6	450	ISMI	DAPI	0.0294428
Stn_Others	M139	A5_6	450	ISMI	DAPI	0.0294428
Stn_Others	M139	A5_6	450	ISMI	DAPI	0.0294428
Stn_Others	M139	A5_6	450	ISMI	DAPI	0.0294428
Stn_Others	M139	A5_6	450	ISMI	DAPI	0.0288141
Stn_Others	M139	A5_6	450	ISMI	DAPI	0.0288141
Stn_Others	M139	A5_6	450	ISMI	DAPI	0.0288141
Stn_Others	M139	A5_6	450	ISMI	DAPI	0.0288141
Stn_Others	M139	A5_6	450	ISMI	DAPI	0.0288141
Stn_Others	M139	A5_6	450	ISMI	DAPI	0.0288141
Stn_Others	M139	A5_6	450	ISMI	DAPI	0.0288141
Stn_Others	M139	A5_6	450	ISMI	DAPI	0.02819
Stn_Others	M139	A5_6	450	ISMI	DAPI	0.0275705
Stn_Others	M139	A5_6	450	ISMI	DAPI	0.0275705
Stn_Others	M139	A5_6	450	ISMI	DAPI	0.0275705
Stn_Others	M139	A5_6	450	ISMI	DAPI	0.0269555
Stn_Others	M139	A5_6	450	ISMI	DAPI	0.0269555
Stn_Others	M139	A5_6	450	ISMI	DAPI	0.0263452
Stn_Others	M139	A5_6	450	ISMI	DAPI	0.0263452
Stn_Others	M139	A5_6	450	ISMI	DAPI	0.0263452
Stn_Others	M139	A5_6	450	ISMI	DAPI	0.0263452
Stn_Others	M139	A5_6	450	ISMI	DAPI	0.0263452
Stn_Others	M139	A5_6	450	ISMI	DAPI	0.0257396
Stn_Others	M139	A5_6	450	ISMI	DAPI	0.0257396
Stn_Others	M139	A5_6	450	ISMI	DAPI	0.0251387
Stn_Others	M139	A5_6	450	ISMI	DAPI	0.0245425
Stn_Others	M139	A5_6	450	ISMI	DAPI	0.0245425
Stn_Others	M139	A5_6	450	ISMI	DAPI	0.0245425
Stn_Others	M139	A5_6	450	ISMI	DAPI	0.0245425
Stn_Others	M139	A5_6	450	ISMI	DAPI	0.0245425
Stn_Others	M139	A5_6	450	ISMI	DAPI	0.0245425
Stn_Others	M139	A5_6	450	ISMI	DAPI	0.0239512
Stn_Others	M139	A5_6	450	ISMI	DAPI	0.0239512
Stn_Others	M139	A5_6	450	ISMI	DAPI	0.0233646
Stn_Others	M139	A5_6	450	ISMI	DAPI	0.0233646
Stn_Others	M139	A5_6	450	ISMI	DAPI	0.0233646
Stn_Others	M139	A5_6	450	ISMI	DAPI	0.0233646
Stn_Others	M139	A5_6	450	ISMI	DAPI	0.0233646
Stn_Others	M139	A5_6	450	ISMI	DAPI	0.0227829
Stn_Others	M139	A5_6	450	ISMI	DAPI	0.0222062
Stn_Others	M139	A5_6	450	ISMI	DAPI	0.0222062
Stn_Others	M139	A5_6	450	ISMI	DAPI	0.0222062
Stn_Others	M139	A5_6	450	ISMI	DAPI	0.0222062
Stn_Others	M139	A5_6	450	ISMI	DAPI	0.0216344
Stn_Others	M139	A5_6	450	ISMI	DAPI	0.0216344
Stn_Others	M139	A5_6	450	ISMI	DAPI	0.0216344
Stn_Others	M139	A5_6	450	ISMI	DAPI	0.0210675
Stn_Others	M139	A5_6	450	ISMI	DAPI	0.0210675
Stn_Others	M139	A5_6	450	ISMI	DAPI	0.0210675
Stn_Others	M139	A5_6	450	ISMI	DAPI	0.0210675
Stn_Others	M139	A5_6	450	ISMI	DAPI	0.0205058
Stn_Others	M139	A5_6	450	ISMI	DAPI	0.0205058
Stn_Others	M139	A5_6	450	ISMI	DAPI	0.0205058
Stn_Others	M139	A5_6	450	ISMI	DAPI	0.0205058
Stn_Others	M139	A5_6	450	ISMI	DAPI	0.0205058
Stn_Others	M139	A5_6	450	ISMI	DAPI	0.0205058
Stn_Others	M139	A5_6	450	ISMI	DAPI	0.0205058
Stn_Others	M139	A5_6	450	ISMI	DAPI	0.0205058
Stn_Others	M139	A5_6	450	ISMI	DAPI	0.0205058
Stn_Others	M139	A5_6	450	ISMI	DAPI	0.0199491
Stn_Others	M139	A5_6	450	ISMI	DAPI	0.0199491
Stn_Others	M139	A5_6	450	ISMI	DAPI	0.0199491
Stn_Others	M139	A5_6	450	ISMI	DAPI	0.0199491
Stn_Others	M139	A5_6	450	ISMI	DAPI	0.0199491
Stn_Others	M139	A5_6	450	ISMI	DAPI	0.0199491
Stn_Others	M139	A5_6	450	ISMI	DAPI	0.0199491
Stn_Others	M139	A5_6	450	ISMI	DAPI	0.0193975
Stn_Others	M139	A5_6	450	ISMI	DAPI	0.0193975
Stn_Others	M139	A5_6	450	ISMI	DAPI	0.0193975
Stn_Others	M139	A5_6	450	ISMI	DAPI	0.0193975
Stn_Others	M139	A5_6	450	ISMI	DAPI	0.0188511
Stn_Others	M139	A5_6	450	ISMI	DAPI	0.0188511
Stn_Others	M139	A5_6	450	ISMI	DAPI	0.0188511
Stn_Others	M139	A5_6	450	ISMI	DAPI	0.0188511
Stn_Others	M139	A5_6	450	ISMI	DAPI	0.0183099
Stn_Others	M139	A5_6	450	ISMI	DAPI	0.0183099
Stn_Others	M139	A5_6	450	ISMI	DAPI	0.0183099
Stn_Others	M139	A5_6	450	ISMI	DAPI	0.0183099
Stn_Others	M139	A5_6	450	ISMI	DAPI	0.0183099
Stn_Others	M139	A5_6	450	ISMI	DAPI	0.0183099
Stn_Others	M139	A5_6	450	ISMI	DAPI	0.0177741
Stn_Others	M139	A5_6	450	ISMI	DAPI	0.0177741
Stn_Others	M139	A5_6	450	ISMI	DAPI	0.0177741
Stn_Others	M139	A5_6	450	ISMI	DAPI	0.0177741
Stn_Others	M139	A5_6	450	ISMI	DAPI	0.0177741
Stn_Others	M139	A5_6	450	ISMI	DAPI	0.0172435
Stn_Others	M139	A5_6	450	ISMI	DAPI	0.0172435
Stn_Others	M139	A5_6	450	ISMI	DAPI	0.0172435
Stn_Others	M139	A5_6	450	ISMI	DAPI	0.0172435
Stn_Others	M139	A5_6	450	ISMI	DAPI	0.0167184
Stn_Others	M139	A5_6	450	ISMI	DAPI	0.0167184
Stn_Others	M139	A5_6	450	ISMI	DAPI	0.0167184
Stn_Others	M139	A5_6	450	ISMI	DAPI	0.0167184
Stn_Others	M139	A5_6	450	ISMI	DAPI	0.0167184
Stn_Others	M139	A5_6	450	ISMI	DAPI	0.0167184
Stn_Others	M139	A5_6	450	ISMI	DAPI	0.0167184
Stn_Others	M139	A5_6	450	ISMI	DAPI	0.0167184
Stn_Others	M139	A5_6	450	ISMI	DAPI	0.0161986
Stn_Others	M139	A5_6	450	ISMI	DAPI	0.0161986
Stn_Others	M139	A5_6	450	ISMI	DAPI	0.0156844
Stn_Others	M139	A5_6	450	ISMI	DAPI	0.0156844
Stn_Others	M139	A5_6	450	ISMI	DAPI	0.0156844
Stn_Others	M139	A5_6	450	ISMI	DAPI	0.0156844
Stn_Others	M139	A5_6	450	ISMI	DAPI	0.0156844
Stn_Others	M139	A5_6	450	ISMI	DAPI	0.0156844
Stn_Others	M139	A5_6	450	ISMI	DAPI	0.0151758
Stn_Others	M139	A5_6	450	ISMI	DAPI	0.0151758
Stn_Others	M139	A5_6	450	ISMI	DAPI	0.0146727
Stn_Others	M139	A5_6	450	ISMI	DAPI	0.0146727
Stn_Others	M139	A5_6	450	ISMI	DAPI	0.0146727
Stn_Others	M139	A5_6	450	ISMI	DAPI	0.0146727
Stn_Others	M139	A5_6	450	ISMI	DAPI	0.0141754
Stn_Others	M139	A5_6	450	ISMI	DAPI	0.0141754
Stn_Others	M139	A5_6	450	ISMI	DAPI	0.0136838
Stn_Others	M139	A5_6	450	ISMI	DAPI	0.0136838
Stn_Others	M139	A5_6	450	ISMI	DAPI	0.0136838
Stn_Others	M139	A5_6	450	ISMI	DAPI	0.0136838
Stn_Others	M139	A5_6	450	ISMI	DAPI	0.0136838
Stn_Others	M139	A5_6	450	ISMI	DAPI	0.013198
Stn_Others	M139	A5_6	450	ISMI	DAPI	0.013198
Stn_Others	M139	A5_6	450	ISMI	DAPI	0.0127181
Stn_Others	M139	A5_6	450	ISMI	DAPI	0.0127181
Stn_Others	M139	A5_6	450	ISMI	DAPI	0.0127181
Stn_Others	M139	A5_6	450	ISMI	DAPI	0.0127181
Stn_Others	M139	A5_6	450	ISMI	DAPI	0.0122441
Stn_Others	M139	A5_6	450	ISMI	DAPI	0.0122441
Stn_Others	M139	A5_6	450	ISMI	DAPI	0.0117763
Stn_Others	M139	A5_6	450	ISMI	DAPI	0.0117763
Stn_Others	M139	A5_6	450	ISMI	DAPI	0.0117763
Stn_Others	M139	A5_6	450	ISMI	DAPI	0.0117763
Stn_Others	M139	A5_6	450	ISMI	DAPI	0.0117763
Stn_Others	M139	A5_6	450	ISMI	DAPI	0.0117763
Stn_Others	M139	A5_6	450	ISMI	DAPI	0.0117763
Stn_Others	M139	A5_6	450	ISMI	DAPI	0.0113145
Stn_Others	M139	A5_6	450	ISMI	DAPI	0.0113145
Stn_Others	M139	A5_6	450	ISMI	DAPI	0.0108589
Stn_Others	M139	A5_6	450	ISMI	DAPI	0.0108589
Stn_Others	M139	A5_6	450	ISMI	DAPI	0.0108589
Stn_Others	M139	A5_6	450	ISMI	DAPI	0.0108589
Stn_Others	M139	A5_6	450	ISMI	DAPI	0.0108589
Stn_Others	M139	A5_6	450	ISMI	DAPI	0.0104096
Stn_Others	M139	A5_6	450	ISMI	DAPI	0.0104096
Stn_Others	M139	A5_6	450	ISMI	DAPI	0.00996667
Stn_Others	M139	A5_6	450	ISMI	DAPI	0.00996667
Stn_Others	M139	A5_6	450	ISMI	DAPI	0.00996667
Stn_Others	M139	A5_6	450	ISMI	DAPI	0.00996667
Stn_Others	M139	A5_6	450	ISMI	DAPI	0.00996667
Stn_Others	M139	A5_6	450	ISMI	DAPI	0.00953021
Stn_Others	M139	A5_6	450	ISMI	DAPI	0.00953021
Stn_Others	M139	A5_6	450	ISMI	DAPI	0.00953021
Stn_Others	M139	A5_6	450	ISMI	DAPI	0.00953021
Stn_Others	M139	A5_6	450	ISMI	DAPI	0.00953021
Stn_Others	M139	A5_6	450	ISMI	DAPI	0.00953021
Stn_Others	M139	A5_6	450	ISMI	DAPI	0.00953021
Stn_Others	M139	A5_6	450	ISMI	DAPI	0.00910032
Stn_Others	M139	A5_6	450	ISMI	DAPI	0.00910032
Stn_Others	M139	A5_6	450	ISMI	DAPI	0.00867709
Stn_Others	M139	A5_6	450	ISMI	DAPI	0.00867709
Stn_Others	M139	A5_6	450	ISMI	DAPI	0.00867709
Stn_Others	M139	A5_6	450	ISMI	DAPI	0.00867709
Stn_Others	M139	A5_6	450	ISMI	DAPI	0.00826064
Stn_Others	M139	A5_6	450	ISMI	DAPI	0.00826064
Stn_Others	M139	A5_6	450	ISMI	DAPI	0.00826064
Stn_Others	M139	A5_6	450	ISMI	DAPI	0.00826064
Stn_Others	M139	A5_6	450	ISMI	DAPI	0.00826064
Stn_Others	M139	A5_6	450	ISMI	DAPI	0.00785107
Stn_Others	M139	A5_6	450	ISMI	DAPI	0.00785107
Stn_Others	M139	A5_6	450	ISMI	DAPI	0.00785107
Stn_Others	M139	A5_6	450	ISMI	DAPI	0.00785107
Stn_Others	M139	A5_6	450	ISMI	DAPI	0.0074485
Stn_Others	M139	A5_6	450	ISMI	DAPI	0.00666487
Stn_Others	M139	A5_6	450	ISMI	DAPI	0.00666487
Stn_Others	M139	A5_6	450	ISMI	DAPI	0.00666487
Stn_Others	M139	A5_6	450	ISMI	DAPI	0.00666487
Stn_Others	M139	A5_6	450	ISMI	DAPI	0.00666487
Stn_Others	M139	A5_6	450	ISMI	DAPI	0.00666487
Stn_Others	M139	A5_6	450	ISMI	DAPI	0.00666487
Stn_Others	M139	A5_6	450	ISMI	DAPI	0.00666487
Stn_Others	M139	A5_6	450	ISMI	DAPI	0.00628408
Stn_Others	M139	A5_6	450	ISMI	DAPI	0.00591083
Stn_Others	M139	A5_6	450	ISMI	DAPI	0.00591083
Stn_Others	M139	A5_6	450	ISMI	DAPI	0.00591083
Stn_Others	M139	A5_6	450	ISMI	DAPI	0.00591083
Stn_Others	M139	A5_6	450	ISMI	DAPI	0.00591083
Stn_Others	M139	A5_6	450	ISMI	DAPI	0.00554528
Stn_Others	M139	A5_6	450	ISMI	DAPI	0.00554528
Stn_Others	M139	A5_6	450	ISMI	DAPI	0.00554528
Stn_Others	M139	A5_6	450	ISMI	DAPI	0.00518759
Stn_Others	M139	A5_6	450	ISMI	DAPI	0.00518759
Stn_Others	M139	A5_6	450	ISMI	DAPI	0.00449652
Stn_Others	M139	A5_6	450	ISMI	DAPI	0.00449652
Stn_Others	M139	A5_6	450	ISMI	DAPI	0.00449652
Stn_Others	M139	A5_6	450	ISMI	DAPI	0.00449652
Stn_Others	M139	A5_6	450	ISMI	DAPI	0.00416353
Stn_Others	M139	A5_6	450	ISMI	DAPI	0.00416353
Stn_Others	M139	A5_6	450	ISMI	DAPI	0.00416353
Stn_Others	M139	A5_6	450	ISMI	DAPI	0.00416353
Stn_Others	M139	A5_6	450	ISMI	DAPI	0.0038392
Stn_Others	M139	A5_6	450	ISMI	DAPI	0.0038392
Stn_Others	M139	A5_6	450	ISMI	DAPI	0.0038392
Stn_Others	M139	A5_6	450	ISMI	DAPI	0.0038392
Stn_Others	M139	A5_6	450	ISMI	DAPI	0.0038392
Stn_Others	M139	A5_6	450	ISMI	DAPI	0.00352375
Stn_Others	M139	A5_6	450	ISMI	DAPI	0.00352375
Stn_Others	M139	A5_6	450	ISMI	DAPI	0.00321745
Stn_Others	M139	A5_6	450	ISMI	DAPI	0.00321745
Stn_Others	M139	A5_6	450	ISMI	DAPI	0.00321745
Stn_Others	M139	A5_6	450	ISMI	DAPI	0.00321745
Stn_Others	M139	A5_6	450	ISMI	DAPI	0.00292058
Stn_Others	M139	A5_6	450	ISMI	DAPI	0.00292058
Stn_Others	M139	A5_6	450	ISMI	DAPI	0.00292058
Stn_Others	M139	A5_6	450	ISMI	DAPI	0.00292058
Stn_Others	M139	A5_6	450	ISMI	DAPI	0.00263344
Stn_Others	M139	A5_6	450	ISMI	DAPI	0.00263344
Stn_Others	M139	A5_6	450	ISMI	DAPI	0.00235639
Stn_Others	M139	A5_6	450	ISMI	DAPI	0.00158976
Stn_Others	M139	A5_6	450	ISMI	DAPI	0.00158976
Stn_Others	M139	A5_6	450	ISMI	DAPI	0.00158976
Stn_Others	M139	A5_6	450	ISMI	DAPI	0.00158976
Stn_Others	M139	A5_6	450	ISMI	DAPI	0.000738854
Stn_Others	M139	A5_6	450	ISMI	DAPI	0.000738854
Stn_Others	M139	A5_6	450	ISMI	DAPI	0.549193
Stn_Others	M139	A5_6	450	ISMI	DAPI	0.475869
Stn_Others	M139	A5_6	450	ISMI	DAPI	0.475869
Stn_Others	M139	A5_6	450	ISMI	DAPI	0.354682
Stn_Others	M139	A5_6	450	ISMI	DAPI	0.346602
Stn_Others	M139	A5_6	450	ISMI	DAPI	0.341785
Stn_Others	M139	A5_6	450	ISMI	DAPI	0.335396
Stn_Others	M139	A5_6	450	ISMI	DAPI	0.330632
Stn_Others	M139	A5_6	450	ISMI	DAPI	0.322741
Stn_Others	M139	A5_6	450	ISMI	DAPI	0.313356
Stn_Others	M139	A5_6	450	ISMI	DAPI	0.302525
Stn_Others	M139	A5_6	450	ISMI	DAPI	0.300988
Stn_Others	M139	A5_6	450	ISMI	DAPI	0.293342
Stn_Others	M139	A5_6	450	ISMI	DAPI	0.290302
Stn_Others	M139	A5_6	450	ISMI	DAPI	0.288787
Stn_Others	M139	A5_6	450	ISMI	DAPI	0.287273
Stn_Others	M139	A5_6	450	ISMI	DAPI	0.287273
Stn_Others	M139	A5_6	450	ISMI	DAPI	0.284255
Stn_Others	M139	A5_6	450	ISMI	DAPI	0.279747
Stn_Others	M139	A5_6	450	ISMI	DAPI	0.278249
Stn_Others	M139	A5_6	450	ISMI	DAPI	0.273774
Stn_Others	M139	A5_6	450	ISMI	DAPI	0.270803
Stn_Others	M139	A5_6	450	ISMI	DAPI	0.270803
Stn_Others	M139	A5_6	450	ISMI	DAPI	0.270803
Stn_Others	M139	A5_6	450	ISMI	DAPI	0.267844
Stn_Others	M139	A5_6	450	ISMI	DAPI	0.261957
Stn_Others	M139	A5_6	450	ISMI	DAPI	0.261957
Stn_Others	M139	A5_6	450	ISMI	DAPI	0.257571
Stn_Others	M139	A5_6	450	ISMI	DAPI	0.251761
Stn_Others	M139	A5_6	450	ISMI	DAPI	0.251761
Stn_Others	M139	A5_6	450	ISMI	DAPI	0.250316
Stn_Others	M139	A5_6	450	ISMI	DAPI	0.247433
Stn_Others	M139	A5_6	450	ISMI	DAPI	0.245996
Stn_Others	M139	A5_6	450	ISMI	DAPI	0.245996
Stn_Others	M139	A5_6	450	ISMI	DAPI	0.245996
Stn_Others	M139	A5_6	450	ISMI	DAPI	0.245996
Stn_Others	M139	A5_6	450	ISMI	DAPI	0.244561
Stn_Others	M139	A5_6	450	ISMI	DAPI	0.238852
Stn_Others	M139	A5_6	450	ISMI	DAPI	0.238852
Stn_Others	M139	A5_6	450	ISMI	DAPI	0.238852
Stn_Others	M139	A5_6	450	ISMI	DAPI	0.230372
Stn_Others	M139	A5_6	450	ISMI	DAPI	0.227569
Stn_Others	M139	A5_6	450	ISMI	DAPI	0.226171
Stn_Others	M139	A5_6	450	ISMI	DAPI	0.224777
Stn_Others	M139	A5_6	450	ISMI	DAPI	0.22061
Stn_Others	M139	A5_6	450	ISMI	DAPI	0.215095
Stn_Others	M139	A5_6	450	ISMI	DAPI	0.209626
Stn_Others	M139	A5_6	450	ISMI	DAPI	0.209626
Stn_Others	M139	A5_6	450	ISMI	DAPI	0.209626
Stn_Others	M139	A5_6	450	ISMI	DAPI	0.208267
Stn_Others	M139	A5_6	450	ISMI	DAPI	0.20691
Stn_Others	M139	A5_6	450	ISMI	DAPI	0.202857
Stn_Others	M139	A5_6	450	ISMI	DAPI	0.201512
Stn_Others	M139	A5_6	450	ISMI	DAPI	0.197496
Stn_Others	M139	A5_6	450	ISMI	DAPI	0.196163
Stn_Others	M139	A5_6	450	ISMI	DAPI	0.193506
Stn_Others	M139	A5_6	450	ISMI	DAPI	0.192182
Stn_Others	M139	A5_6	450	ISMI	DAPI	0.192182
Stn_Others	M139	A5_6	450	ISMI	DAPI	0.190861
Stn_Others	M139	A5_6	450	ISMI	DAPI	0.189543
Stn_Others	M139	A5_6	450	ISMI	DAPI	0.189543
Stn_Others	M139	A5_6	450	ISMI	DAPI	0.189543
Stn_Others	M139	A5_6	450	ISMI	DAPI	0.181701
Stn_Others	M139	A5_6	450	ISMI	DAPI	0.180404
Stn_Others	M139	A5_6	450	ISMI	DAPI	0.179111
Stn_Others	M139	A5_6	450	ISMI	DAPI	0.177821
Stn_Others	M139	A5_6	450	ISMI	DAPI	0.176534
Stn_Others	M139	A5_6	450	ISMI	DAPI	0.176534
Stn_Others	M139	A5_6	450	ISMI	DAPI	0.17397
Stn_Others	M139	A5_6	450	ISMI	DAPI	0.17397
Stn_Others	M139	A5_6	450	ISMI	DAPI	0.17397
Stn_Others	M139	A5_6	450	ISMI	DAPI	0.172692
Stn_Others	M139	A5_6	450	ISMI	DAPI	0.168878
Stn_Others	M139	A5_6	450	ISMI	DAPI	0.168878
Stn_Others	M139	A5_6	450	ISMI	DAPI	0.168878
Stn_Others	M139	A5_6	450	ISMI	DAPI	0.167613
Stn_Others	M139	A5_6	450	ISMI	DAPI	0.167613
Stn_Others	M139	A5_6	450	ISMI	DAPI	0.165092
Stn_Others	M139	A5_6	450	ISMI	DAPI	0.165092
Stn_Others	M139	A5_6	450	ISMI	DAPI	0.165092
Stn_Others	M139	A5_6	450	ISMI	DAPI	0.163837
Stn_Others	M139	A5_6	450	ISMI	DAPI	0.163837
Stn_Others	M139	A5_6	450	ISMI	DAPI	0.162585
Stn_Others	M139	A5_6	450	ISMI	DAPI	0.161336
Stn_Others	M139	A5_6	450	ISMI	DAPI	0.161336
Stn_Others	M139	A5_6	450	ISMI	DAPI	0.161336
Stn_Others	M139	A5_6	450	ISMI	DAPI	0.16009
Stn_Others	M139	A5_6	450	ISMI	DAPI	0.16009
Stn_Others	M139	A5_6	450	ISMI	DAPI	0.158847
Stn_Others	M139	A5_6	450	ISMI	DAPI	0.157608
Stn_Others	M139	A5_6	450	ISMI	DAPI	0.156372
Stn_Others	M139	A5_6	450	ISMI	DAPI	0.156372
Stn_Others	M139	A5_6	450	ISMI	DAPI	0.156372
Stn_Others	M139	A5_6	450	ISMI	DAPI	0.155139
Stn_Others	M139	A5_6	450	ISMI	DAPI	0.153909
Stn_Others	M139	A5_6	450	ISMI	DAPI	0.153909
Stn_Others	M139	A5_6	450	ISMI	DAPI	0.153909
Stn_Others	M139	A5_6	450	ISMI	DAPI	0.152683
Stn_Others	M139	A5_6	450	ISMI	DAPI	0.152683
Stn_Others	M139	A5_6	450	ISMI	DAPI	0.15024
Stn_Others	M139	A5_6	450	ISMI	DAPI	0.15024
Stn_Others	M139	A5_6	450	ISMI	DAPI	0.15024
Stn_Others	M139	A5_6	450	ISMI	DAPI	0.149023
Stn_Others	M139	A5_6	450	ISMI	DAPI	0.1466
Stn_Others	M139	A5_6	450	ISMI	DAPI	0.1466
Stn_Others	M139	A5_6	450	ISMI	DAPI	0.1466
Stn_Others	M139	A5_6	450	ISMI	DAPI	0.1466
Stn_Others	M139	A5_6	450	ISMI	DAPI	0.1466
Stn_Others	M139	A5_6	450	ISMI	DAPI	0.145394
Stn_Others	M139	A5_6	450	ISMI	DAPI	0.145394
Stn_Others	M139	A5_6	450	ISMI	DAPI	0.145394
Stn_Others	M139	A5_6	450	ISMI	DAPI	0.144191
Stn_Others	M139	A5_6	450	ISMI	DAPI	0.144191
Stn_Others	M139	A5_6	450	ISMI	DAPI	0.142991
Stn_Others	M139	A5_6	450	ISMI	DAPI	0.141794
Stn_Others	M139	A5_6	450	ISMI	DAPI	0.141794
Stn_Others	M139	A5_6	450	ISMI	DAPI	0.140601
Stn_Others	M139	A5_6	450	ISMI	DAPI	0.140601
Stn_Others	M139	A5_6	450	ISMI	DAPI	0.139411
Stn_Others	M139	A5_6	450	ISMI	DAPI	0.139411
Stn_Others	M139	A5_6	450	ISMI	DAPI	0.135862
Stn_Others	M139	A5_6	450	ISMI	DAPI	0.135862
Stn_Others	M139	A5_6	450	ISMI	DAPI	0.135862
Stn_Others	M139	A5_6	450	ISMI	DAPI	0.135862
Stn_Others	M139	A5_6	450	ISMI	DAPI	0.135862
Stn_Others	M139	A5_6	450	ISMI	DAPI	0.134685
Stn_Others	M139	A5_6	450	ISMI	DAPI	0.134685
Stn_Others	M139	A5_6	450	ISMI	DAPI	0.133513
Stn_Others	M139	A5_6	450	ISMI	DAPI	0.133513
Stn_Others	M139	A5_6	450	ISMI	DAPI	0.132343
Stn_Others	M139	A5_6	450	ISMI	DAPI	0.132343
Stn_Others	M139	A5_6	450	ISMI	DAPI	0.132343
Stn_Others	M139	A5_6	450	ISMI	DAPI	0.131177
Stn_Others	M139	A5_6	450	ISMI	DAPI	0.131177
Stn_Others	M139	A5_6	450	ISMI	DAPI	0.130015
Stn_Others	M139	A5_6	450	ISMI	DAPI	0.130015
Stn_Others	M139	A5_6	450	ISMI	DAPI	0.128855
Stn_Others	M139	A5_6	450	ISMI	DAPI	0.128855
Stn_Others	M139	A5_6	450	ISMI	DAPI	0.128855
Stn_Others	M139	A5_6	450	ISMI	DAPI	0.1277
Stn_Others	M139	A5_6	450	ISMI	DAPI	0.126548
Stn_Others	M139	A5_6	450	ISMI	DAPI	0.126548
Stn_Others	M139	A5_6	450	ISMI	DAPI	0.125399
Stn_Others	M139	A5_6	450	ISMI	DAPI	0.125399
Stn_Others	M139	A5_6	450	ISMI	DAPI	0.124254
Stn_Others	M139	A5_6	450	ISMI	DAPI	0.121974
Stn_Others	M139	A5_6	450	ISMI	DAPI	0.121974
Stn_Others	M139	A5_6	450	ISMI	DAPI	0.121974
Stn_Others	M139	A5_6	450	ISMI	DAPI	0.121974
Stn_Others	M139	A5_6	450	ISMI	DAPI	0.120839
Stn_Others	M139	A5_6	450	ISMI	DAPI	0.119708
Stn_Others	M139	A5_6	450	ISMI	DAPI	0.119708
Stn_Others	M139	A5_6	450	ISMI	DAPI	0.118581
Stn_Others	M139	A5_6	450	ISMI	DAPI	0.118581
Stn_Others	M139	A5_6	450	ISMI	DAPI	0.118581
Stn_Others	M139	A5_6	450	ISMI	DAPI	0.117457
Stn_Others	M139	A5_6	450	ISMI	DAPI	0.117457
Stn_Others	M139	A5_6	450	ISMI	DAPI	0.116336
Stn_Others	M139	A5_6	450	ISMI	DAPI	0.116336
Stn_Others	M139	A5_6	450	ISMI	DAPI	0.116336
Stn_Others	M139	A5_6	450	ISMI	DAPI	0.114106
Stn_Others	M139	A5_6	450	ISMI	DAPI	0.114106
Stn_Others	M139	A5_6	450	ISMI	DAPI	0.114106
Stn_Others	M139	A5_6	450	ISMI	DAPI	0.112997
Stn_Others	M139	A5_6	450	ISMI	DAPI	0.112997
Stn_Others	M139	A5_6	450	ISMI	DAPI	0.112997
Stn_Others	M139	A5_6	450	ISMI	DAPI	0.112997
Stn_Others	M139	A5_6	450	ISMI	DAPI	0.111891
Stn_Others	M139	A5_6	450	ISMI	DAPI	0.111891
Stn_Others	M139	A5_6	450	ISMI	DAPI	0.111891
Stn_Others	M139	A5_6	450	ISMI	DAPI	0.110788
Stn_Others	M139	A5_6	450	ISMI	DAPI	0.110788
Stn_Others	M139	A5_6	450	ISMI	DAPI	0.109689
Stn_Others	M139	A5_6	450	ISMI	DAPI	0.108594
Stn_Others	M139	A5_6	450	ISMI	DAPI	0.108594
Stn_Others	M139	A5_6	450	ISMI	DAPI	0.107503
Stn_Others	M139	A5_6	450	ISMI	DAPI	0.107503
Stn_Others	M139	A5_6	450	ISMI	DAPI	0.106415
Stn_Others	M139	A5_6	450	ISMI	DAPI	0.105331
Stn_Others	M139	A5_6	450	ISMI	DAPI	0.104251
Stn_Others	M139	A5_6	450	ISMI	DAPI	0.103174
Stn_Others	M139	A5_6	450	ISMI	DAPI	0.103174
Stn_Others	M139	A5_6	450	ISMI	DAPI	0.103174
Stn_Others	M139	A5_6	450	ISMI	DAPI	0.103174
Stn_Others	M139	A5_6	450	ISMI	DAPI	0.102101
Stn_Others	M139	A5_6	450	ISMI	DAPI	0.102101
Stn_Others	M139	A5_6	450	ISMI	DAPI	0.102101
Stn_Others	M139	A5_6	450	ISMI	DAPI	0.102101
Stn_Others	M139	A5_6	450	ISMI	DAPI	0.102101
Stn_Others	M139	A5_6	450	ISMI	DAPI	0.099967
Stn_Others	M139	A5_6	450	ISMI	DAPI	0.099967
Stn_Others	M139	A5_6	450	ISMI	DAPI	0.0989054
Stn_Others	M139	A5_6	450	ISMI	DAPI	0.0989054
Stn_Others	M139	A5_6	450	ISMI	DAPI	0.0978476
Stn_Others	M139	A5_6	450	ISMI	DAPI	0.0978476
Stn_Others	M139	A5_6	450	ISMI	DAPI	0.0978476
Stn_Others	M139	A5_6	450	ISMI	DAPI	0.0967936
Stn_Others	M139	A5_6	450	ISMI	DAPI	0.094697
Stn_Others	M139	A5_6	450	ISMI	DAPI	0.094697
Stn_Others	M139	A5_6	450	ISMI	DAPI	0.0926158
Stn_Others	M139	A5_6	450	ISMI	DAPI	0.0926158
Stn_Others	M139	A5_6	450	ISMI	DAPI	0.0926158
Stn_Others	M139	A5_6	450	ISMI	DAPI	0.091581
Stn_Others	M139	A5_6	450	ISMI	DAPI	0.091581
Stn_Others	M139	A5_6	450	ISMI	DAPI	0.0905501
Stn_Others	M139	A5_6	450	ISMI	DAPI	0.0905501
Stn_Others	M139	A5_6	450	ISMI	DAPI	0.089523
Stn_Others	M139	A5_6	450	ISMI	DAPI	0.0884999
Stn_Others	M139	A5_6	450	ISMI	DAPI	0.0884999
Stn_Others	M139	A5_6	450	ISMI	DAPI	0.0874807
Stn_Others	M139	A5_6	450	ISMI	DAPI	0.0874807
Stn_Others	M139	A5_6	450	ISMI	DAPI	0.0864655
Stn_Others	M139	A5_6	450	ISMI	DAPI	0.0864655
Stn_Others	M139	A5_6	450	ISMI	DAPI	0.0864655
Stn_Others	M139	A5_6	450	ISMI	DAPI	0.0864655
Stn_Others	M139	A5_6	450	ISMI	DAPI	0.0854542
Stn_Others	M139	A5_6	450	ISMI	DAPI	0.0844469
Stn_Others	M139	A5_6	450	ISMI	DAPI	0.0844469
Stn_Others	M139	A5_6	450	ISMI	DAPI	0.0824443
Stn_Others	M139	A5_6	450	ISMI	DAPI	0.0824443
Stn_Others	M139	A5_6	450	ISMI	DAPI	0.081449
Stn_Others	M139	A5_6	450	ISMI	DAPI	0.081449
Stn_Others	M139	A5_6	450	ISMI	DAPI	0.0804577
Stn_Others	M139	A5_6	450	ISMI	DAPI	0.0804577
Stn_Others	M139	A5_6	450	ISMI	DAPI	0.0794705
Stn_Others	M139	A5_6	450	ISMI	DAPI	0.0784874
Stn_Others	M139	A5_6	450	ISMI	DAPI	0.0775083
Stn_Others	M139	A5_6	450	ISMI	DAPI	0.0775083
Stn_Others	M139	A5_6	450	ISMI	DAPI	0.0775083
Stn_Others	M139	A5_6	450	ISMI	DAPI	0.0765334
Stn_Others	M139	A5_6	450	ISMI	DAPI	0.0765334
Stn_Others	M139	A5_6	450	ISMI	DAPI	0.0765334
Stn_Others	M139	A5_6	450	ISMI	DAPI	0.0755626
Stn_Others	M139	A5_6	450	ISMI	DAPI	0.0755626
Stn_Others	M139	A5_6	450	ISMI	DAPI	0.0755626
Stn_Others	M139	A5_6	450	ISMI	DAPI	0.0755626
Stn_Others	M139	A5_6	450	ISMI	DAPI	0.0755626
Stn_Others	M139	A5_6	450	ISMI	DAPI	0.0745959
Stn_Others	M139	A5_6	450	ISMI	DAPI	0.0745959
Stn_Others	M139	A5_6	450	ISMI	DAPI	0.0736334
Stn_Others	M139	A5_6	450	ISMI	DAPI	0.072675
Stn_Others	M139	A5_6	450	ISMI	DAPI	0.072675
Stn_Others	M139	A5_6	450	ISMI	DAPI	0.0717209
Stn_Others	M139	A5_6	450	ISMI	DAPI	0.0717209
Stn_Others	M139	A5_6	450	ISMI	DAPI	0.0707709
Stn_Others	M139	A5_6	450	ISMI	DAPI	0.0707709
Stn_Others	M139	A5_6	450	ISMI	DAPI	0.0698252
Stn_Others	M139	A5_6	450	ISMI	DAPI	0.0698252
Stn_Others	M139	A5_6	450	ISMI	DAPI	0.0698252
Stn_Others	M139	A5_6	450	ISMI	DAPI	0.0688838
Stn_Others	M139	A5_6	450	ISMI	DAPI	0.0688838
Stn_Others	M139	A5_6	450	ISMI	DAPI	0.0679466
Stn_Others	M139	A5_6	450	ISMI	DAPI	0.0679466
Stn_Others	M139	A5_6	450	ISMI	DAPI	0.0679466
Stn_Others	M139	A5_6	450	ISMI	DAPI	0.0670137
Stn_Others	M139	A5_6	450	ISMI	DAPI	0.0670137
Stn_Others	M139	A5_6	450	ISMI	DAPI	0.0670137
Stn_Others	M139	A5_6	450	ISMI	DAPI	0.0660851
Stn_Others	M139	A5_6	450	ISMI	DAPI	0.0660851
Stn_Others	M139	A5_6	450	ISMI	DAPI	0.0651608
Stn_Others	M139	A5_6	450	ISMI	DAPI	0.0651608
Stn_Others	M139	A5_6	450	ISMI	DAPI	0.0651608
Stn_Others	M139	A5_6	450	ISMI	DAPI	0.0642409
Stn_Others	M139	A5_6	450	ISMI	DAPI	0.0642409
Stn_Others	M139	A5_6	450	ISMI	DAPI	0.0642409
Stn_Others	M139	A5_6	450	ISMI	DAPI	0.0633254
Stn_Others	M139	A5_6	450	ISMI	DAPI	0.0633254
Stn_Others	M139	A5_6	450	ISMI	DAPI	0.0633254
Stn_Others	M139	A5_6	450	ISMI	DAPI	0.0624142
Stn_Others	M139	A5_6	450	ISMI	DAPI	0.0624142
Stn_Others	M139	A5_6	450	ISMI	DAPI	0.0615075
Stn_Others	M139	A5_6	450	ISMI	DAPI	0.0606052
Stn_Others	M139	A5_6	450	ISMI	DAPI	0.0597074
Stn_Others	M139	A5_6	450	ISMI	DAPI	0.058814
Stn_Others	M139	A5_6	450	ISMI	DAPI	0.0579251
Stn_Others	M139	A5_6	450	ISMI	DAPI	0.0570408
Stn_Others	M139	A5_6	450	ISMI	DAPI	0.0570408
Stn_Others	M139	A5_6	450	ISMI	DAPI	0.056161
Stn_Others	M139	A5_6	450	ISMI	DAPI	0.056161
Stn_Others	M139	A5_6	450	ISMI	DAPI	0.056161
Stn_Others	M139	A5_6	450	ISMI	DAPI	0.056161
Stn_Others	M139	A5_6	450	ISMI	DAPI	0.056161
Stn_Others	M139	A5_6	450	ISMI	DAPI	0.0552858
Stn_Others	M139	A5_6	450	ISMI	DAPI	0.0552858
Stn_Others	M139	A5_6	450	ISMI	DAPI	0.0544151
Stn_Others	M139	A5_6	450	ISMI	DAPI	0.0535491
Stn_Others	M139	A5_6	450	ISMI	DAPI	0.0535491
Stn_Others	M139	A5_6	450	ISMI	DAPI	0.051831
Stn_Others	M139	A5_6	450	ISMI	DAPI	0.0501318
Stn_Others	M139	A5_6	450	ISMI	DAPI	0.0501318
Stn_Others	M139	A5_6	450	ISMI	DAPI	0.0501318
Stn_Others	M139	A5_6	450	ISMI	DAPI	0.0501318
Stn_Others	M139	A5_6	450	ISMI	DAPI	0.0492892
Stn_Others	M139	A5_6	450	ISMI	DAPI	0.0492892
Stn_Others	M139	A5_6	450	ISMI	DAPI	0.0492892
Stn_Others	M139	A5_6	450	ISMI	DAPI	0.0492892
Stn_Others	M139	A5_6	450	ISMI	DAPI	0.0492892
Stn_Others	M139	A5_6	450	ISMI	DAPI	0.0484515
Stn_Others	M139	A5_6	450	ISMI	DAPI	0.0484515
Stn_Others	M139	A5_6	450	ISMI	DAPI	0.0484515
Stn_Others	M139	A5_6	450	ISMI	DAPI	0.0484515
Stn_Others	M139	A5_6	450	ISMI	DAPI	0.0476185
Stn_Others	M139	A5_6	450	ISMI	DAPI	0.0476185
Stn_Others	M139	A5_6	450	ISMI	DAPI	0.0476185
Stn_Others	M139	A5_6	450	ISMI	DAPI	0.0467904
Stn_Others	M139	A5_6	450	ISMI	DAPI	0.0467904
Stn_Others	M139	A5_6	450	ISMI	DAPI	0.0459671
Stn_Others	M139	A5_6	450	ISMI	DAPI	0.0459671
Stn_Others	M139	A5_6	450	ISMI	DAPI	0.0451487
Stn_Others	M139	A5_6	450	ISMI	DAPI	0.0451487
Stn_Others	M139	A5_6	450	ISMI	DAPI	0.0451487
Stn_Others	M139	A5_6	450	ISMI	DAPI	0.0443352
Stn_Others	M139	A5_6	450	ISMI	DAPI	0.0443352
Stn_Others	M139	A5_6	450	ISMI	DAPI	0.0443352
Stn_Others	M139	A5_6	450	ISMI	DAPI	0.0443352
Stn_Others	M139	A5_6	450	ISMI	DAPI	0.0435267
Stn_Others	M139	A5_6	450	ISMI	DAPI	0.0435267
Stn_Others	M139	A5_6	450	ISMI	DAPI	0.0435267
Stn_Others	M139	A5_6	450	ISMI	DAPI	0.0435267
Stn_Others	M139	A5_6	450	ISMI	DAPI	0.0427231
Stn_Others	M139	A5_6	450	ISMI	DAPI	0.0427231
Stn_Others	M139	A5_6	450	ISMI	DAPI	0.0427231
Stn_Others	M139	A5_6	450	ISMI	DAPI	0.0427231
Stn_Others	M139	A5_6	450	ISMI	DAPI	0.0419246
Stn_Others	M139	A5_6	450	ISMI	DAPI	0.0419246
Stn_Others	M139	A5_6	450	ISMI	DAPI	0.0411311
Stn_Others	M139	A5_6	450	ISMI	DAPI	0.0411311
Stn_Others	M139	A5_6	450	ISMI	DAPI	0.0403426
Stn_Others	M139	A5_6	450	ISMI	DAPI	0.0395593
Stn_Others	M139	A5_6	450	ISMI	DAPI	0.0395593
Stn_Others	M139	A5_6	450	ISMI	DAPI	0.0387811
Stn_Others	M139	A5_6	450	ISMI	DAPI	0.0387811
Stn_Others	M139	A5_6	450	ISMI	DAPI	0.0387811
Stn_Others	M139	A5_6	450	ISMI	DAPI	0.038008
Stn_Others	M139	A5_6	450	ISMI	DAPI	0.038008
Stn_Others	M139	A5_6	450	ISMI	DAPI	0.038008
Stn_Others	M139	A5_6	450	ISMI	DAPI	0.038008
Stn_Others	M139	A5_6	450	ISMI	DAPI	0.038008
Stn_Others	M139	A5_6	450	ISMI	DAPI	0.0372402
Stn_Others	M139	A5_6	450	ISMI	DAPI	0.0372402
Stn_Others	M139	A5_6	450	ISMI	DAPI	0.0364776
Stn_Others	M139	A5_6	450	ISMI	DAPI	0.0364776
Stn_Others	M139	A5_6	450	ISMI	DAPI	0.0364776
Stn_Others	M139	A5_6	450	ISMI	DAPI	0.0357203
Stn_Others	M139	A5_6	450	ISMI	DAPI	0.0349683
Stn_Others	M139	A5_6	450	ISMI	DAPI	0.0349683
Stn_Others	M139	A5_6	450	ISMI	DAPI	0.0349683
Stn_Others	M139	A5_6	450	ISMI	DAPI	0.0342217
Stn_Others	M139	A5_6	450	ISMI	DAPI	0.0334804
Stn_Others	M139	A5_6	450	ISMI	DAPI	0.0334804
Stn_Others	M139	A5_6	450	ISMI	DAPI	0.0327446
Stn_Others	M139	A5_6	450	ISMI	DAPI	0.0327446
Stn_Others	M139	A5_6	450	ISMI	DAPI	0.0320143
Stn_Others	M139	A5_6	450	ISMI	DAPI	0.0320143
Stn_Others	M139	A5_6	450	ISMI	DAPI	0.0320143
Stn_Others	M139	A5_6	450	ISMI	DAPI	0.0312895
Stn_Others	M139	A5_6	450	ISMI	DAPI	0.0312895
Stn_Others	M139	A5_6	450	ISMI	DAPI	0.0305702
Stn_Others	M139	A5_6	450	ISMI	DAPI	0.0305702
Stn_Others	M139	A5_6	450	ISMI	DAPI	0.0305702
Stn_Others	M139	A5_6	450	ISMI	DAPI	0.0298565
Stn_Others	M139	A5_6	450	ISMI	DAPI	0.0298565
Stn_Others	M139	A5_6	450	ISMI	DAPI	0.0298565
Stn_Others	M139	A5_6	450	ISMI	DAPI	0.0298565
Stn_Others	M139	A5_6	450	ISMI	DAPI	0.0298565
Stn_Others	M139	A5_6	450	ISMI	DAPI	0.0284461
Stn_Others	M139	A5_6	450	ISMI	DAPI	0.0284461
Stn_Others	M139	A5_6	450	ISMI	DAPI	0.0277495
Stn_Others	M139	A5_6	450	ISMI	DAPI	0.0277495
Stn_Others	M139	A5_6	450	ISMI	DAPI	0.0277495
Stn_Others	M139	A5_6	450	ISMI	DAPI	0.0277495
Stn_Others	M139	A5_6	450	ISMI	DAPI	0.0270586
Stn_Others	M139	A5_6	450	ISMI	DAPI	0.0270586
Stn_Others	M139	A5_6	450	ISMI	DAPI	0.0263736
Stn_Others	M139	A5_6	450	ISMI	DAPI	0.0263736
Stn_Others	M139	A5_6	450	ISMI	DAPI	0.0256945
Stn_Others	M139	A5_6	450	ISMI	DAPI	0.0256945
Stn_Others	M139	A5_6	450	ISMI	DAPI	0.0256945
Stn_Others	M139	A5_6	450	ISMI	DAPI	0.0256945
Stn_Others	M139	A5_6	450	ISMI	DAPI	0.0256945
Stn_Others	M139	A5_6	450	ISMI	DAPI	0.0250213
Stn_Others	M139	A5_6	450	ISMI	DAPI	0.0250213
Stn_Others	M139	A5_6	450	ISMI	DAPI	0.0250213
Stn_Others	M139	A5_6	450	ISMI	DAPI	0.0250213
Stn_Others	M139	A5_6	450	ISMI	DAPI	0.0250213
Stn_Others	M139	A5_6	450	ISMI	DAPI	0.0243541
Stn_Others	M139	A5_6	450	ISMI	DAPI	0.0243541
Stn_Others	M139	A5_6	450	ISMI	DAPI	0.0243541
Stn_Others	M139	A5_6	450	ISMI	DAPI	0.0243541
Stn_Others	M139	A5_6	450	ISMI	DAPI	0.0243541
Stn_Others	M139	A5_6	450	ISMI	DAPI	0.0243541
Stn_Others	M139	A5_6	450	ISMI	DAPI	0.0243541
Stn_Others	M139	A5_6	450	ISMI	DAPI	0.0236929
Stn_Others	M139	A5_6	450	ISMI	DAPI	0.0236929
Stn_Others	M139	A5_6	450	ISMI	DAPI	0.0236929
Stn_Others	M139	A5_6	450	ISMI	DAPI	0.0236929
Stn_Others	M139	A5_6	450	ISMI	DAPI	0.0236929
Stn_Others	M139	A5_6	450	ISMI	DAPI	0.0236929
Stn_Others	M139	A5_6	450	ISMI	DAPI	0.0230378
Stn_Others	M139	A5_6	450	ISMI	DAPI	0.0230378
Stn_Others	M139	A5_6	450	ISMI	DAPI	0.0223889
Stn_Others	M139	A5_6	450	ISMI	DAPI	0.0217462
Stn_Others	M139	A5_6	450	ISMI	DAPI	0.0217462
Stn_Others	M139	A5_6	450	ISMI	DAPI	0.0217462
Stn_Others	M139	A5_6	450	ISMI	DAPI	0.0217462
Stn_Others	M139	A5_6	450	ISMI	DAPI	0.0217462
Stn_Others	M139	A5_6	450	ISMI	DAPI	0.0211097
Stn_Others	M139	A5_6	450	ISMI	DAPI	0.0211097
Stn_Others	M139	A5_6	450	ISMI	DAPI	0.0211097
Stn_Others	M139	A5_6	450	ISMI	DAPI	0.0204796
Stn_Others	M139	A5_6	450	ISMI	DAPI	0.0204796
Stn_Others	M139	A5_6	450	ISMI	DAPI	0.0204796
Stn_Others	M139	A5_6	450	ISMI	DAPI	0.0204796
Stn_Others	M139	A5_6	450	ISMI	DAPI	0.0204796
Stn_Others	M139	A5_6	450	ISMI	DAPI	0.0198559
Stn_Others	M139	A5_6	450	ISMI	DAPI	0.0198559
Stn_Others	M139	A5_6	450	ISMI	DAPI	0.0192387
Stn_Others	M139	A5_6	450	ISMI	DAPI	0.0186279
Stn_Others	M139	A5_6	450	ISMI	DAPI	0.0180238
Stn_Others	M139	A5_6	450	ISMI	DAPI	0.0180238
Stn_Others	M139	A5_6	450	ISMI	DAPI	0.0180238
Stn_Others	M139	A5_6	450	ISMI	DAPI	0.0174264
Stn_Others	M139	A5_6	450	ISMI	DAPI	0.0174264
Stn_Others	M139	A5_6	450	ISMI	DAPI	0.0168357
Stn_Others	M139	A5_6	450	ISMI	DAPI	0.0168357
Stn_Others	M139	A5_6	450	ISMI	DAPI	0.0168357
Stn_Others	M139	A5_6	450	ISMI	DAPI	0.0162518
Stn_Others	M139	A5_6	450	ISMI	DAPI	0.0156749
Stn_Others	M139	A5_6	450	ISMI	DAPI	0.0156749
Stn_Others	M139	A5_6	450	ISMI	DAPI	0.0151049
Stn_Others	M139	A5_6	450	ISMI	DAPI	0.0151049
Stn_Others	M139	A5_6	450	ISMI	DAPI	0.0151049
Stn_Others	M139	A5_6	450	ISMI	DAPI	0.0151049
Stn_Others	M139	A5_6	450	ISMI	DAPI	0.014542
Stn_Others	M139	A5_6	450	ISMI	DAPI	0.014542
Stn_Others	M139	A5_6	450	ISMI	DAPI	0.0139863
Stn_Others	M139	A5_6	450	ISMI	DAPI	0.0139863
Stn_Others	M139	A5_6	450	ISMI	DAPI	0.0139863
Stn_Others	M139	A5_6	450	ISMI	DAPI	0.0139863
Stn_Others	M139	A5_6	450	ISMI	DAPI	0.0139863
Stn_Others	M139	A5_6	450	ISMI	DAPI	0.0134379
Stn_Others	M139	A5_6	450	ISMI	DAPI	0.0134379
Stn_Others	M139	A5_6	450	ISMI	DAPI	0.0128968
Stn_Others	M139	A5_6	450	ISMI	DAPI	0.0123632
Stn_Others	M139	A5_6	450	ISMI	DAPI	0.0123632
Stn_Others	M139	A5_6	450	ISMI	DAPI	0.0118371
Stn_Others	M139	A5_6	450	ISMI	DAPI	0.0118371
Stn_Others	M139	A5_6	450	ISMI	DAPI	0.0113188
Stn_Others	M139	A5_6	450	ISMI	DAPI	0.0113188
Stn_Others	M139	A5_6	450	ISMI	DAPI	0.0108082
Stn_Others	M139	A5_6	450	ISMI	DAPI	0.0108082
Stn_Others	M139	A5_6	450	ISMI	DAPI	0.0108082
Stn_Others	M139	A5_6	450	ISMI	DAPI	0.0108082
Stn_Others	M139	A5_6	450	ISMI	DAPI	0.0103055
Stn_Others	M139	A5_6	450	ISMI	DAPI	0.0103055
Stn_Others	M139	A5_6	450	ISMI	DAPI	0.0103055
Stn_Others	M139	A5_6	450	ISMI	DAPI	0.0103055
Stn_Others	M139	A5_6	450	ISMI	DAPI	0.0103055
Stn_Others	M139	A5_6	450	ISMI	DAPI	0.00981092
Stn_Others	M139	A5_6	450	ISMI	DAPI	0.00981092
Stn_Others	M139	A5_6	450	ISMI	DAPI	0.00981092
Stn_Others	M139	A5_6	450	ISMI	DAPI	0.00981092
Stn_Others	M139	A5_6	450	ISMI	DAPI	0.00932449
Stn_Others	M139	A5_6	450	ISMI	DAPI	0.00932449
Stn_Others	M139	A5_6	450	ISMI	DAPI	0.00932449
Stn_Others	M139	A5_6	450	ISMI	DAPI	0.00932449
Stn_Others	M139	A5_6	450	ISMI	DAPI	0.00932449
Stn_Others	M139	A5_6	450	ISMI	DAPI	0.00932449
Stn_Others	M139	A5_6	450	ISMI	DAPI	0.00884637
Stn_Others	M139	A5_6	450	ISMI	DAPI	0.00837671
Stn_Others	M139	A5_6	450	ISMI	DAPI	0.00791567
Stn_Others	M139	A5_6	450	ISMI	DAPI	0.00791567
Stn_Others	M139	A5_6	450	ISMI	DAPI	0.00746342
Stn_Others	M139	A5_6	450	ISMI	DAPI	0.00746342
Stn_Others	M139	A5_6	450	ISMI	DAPI	0.00746342
Stn_Others	M139	A5_6	450	ISMI	DAPI	0.00746342
Stn_Others	M139	A5_6	450	ISMI	DAPI	0.00746342
Stn_Others	M139	A5_6	450	ISMI	DAPI	0.00702012
Stn_Others	M139	A5_6	450	ISMI	DAPI	0.00702012
Stn_Others	M139	A5_6	450	ISMI	DAPI	0.00658597
Stn_Others	M139	A5_6	450	ISMI	DAPI	0.00658597
Stn_Others	M139	A5_6	450	ISMI	DAPI	0.00658597
Stn_Others	M139	A5_6	450	ISMI	DAPI	0.00658597
Stn_Others	M139	A5_6	450	ISMI	DAPI	0.00616115
Stn_Others	M139	A5_6	450	ISMI	DAPI	0.00616115
Stn_Others	M139	A5_6	450	ISMI	DAPI	0.00574588
Stn_Others	M139	A5_6	450	ISMI	DAPI	0.00574588
Stn_Others	M139	A5_6	450	ISMI	DAPI	0.00574588
Stn_Others	M139	A5_6	450	ISMI	DAPI	0.00574588
Stn_Others	M139	A5_6	450	ISMI	DAPI	0.00534039
Stn_Others	M139	A5_6	450	ISMI	DAPI	0.00534039
Stn_Others	M139	A5_6	450	ISMI	DAPI	0.00534039
Stn_Others	M139	A5_6	450	ISMI	DAPI	0.00494491
Stn_Others	M139	A5_6	450	ISMI	DAPI	0.00494491
Stn_Others	M139	A5_6	450	ISMI	DAPI	0.00494491
Stn_Others	M139	A5_6	450	ISMI	DAPI	0.00494491
Stn_Others	M139	A5_6	450	ISMI	DAPI	0.0045597
Stn_Others	M139	A5_6	450	ISMI	DAPI	0.0045597
Stn_Others	M139	A5_6	450	ISMI	DAPI	0.0045597
Stn_Others	M139	A5_6	450	ISMI	DAPI	0.0045597
Stn_Others	M139	A5_6	450	ISMI	DAPI	0.00418506
Stn_Others	M139	A5_6	450	ISMI	DAPI	0.00418506
Stn_Others	M139	A5_6	450	ISMI	DAPI	0.00418506
Stn_Others	M139	A5_6	450	ISMI	DAPI	0.00418506
Stn_Others	M139	A5_6	450	ISMI	DAPI	0.00382127
Stn_Others	M139	A5_6	450	ISMI	DAPI	0.00382127
Stn_Others	M139	A5_6	450	ISMI	DAPI	0.00382127
Stn_Others	M139	A5_6	450	ISMI	DAPI	0.00346868
Stn_Others	M139	A5_6	450	ISMI	DAPI	0.00346868
Stn_Others	M139	A5_6	450	ISMI	DAPI	0.00346868
Stn_Others	M139	A5_6	450	ISMI	DAPI	0.00346868
Stn_Others	M139	A5_6	450	ISMI	DAPI	0.00346868
Stn_Others	M139	A5_6	450	ISMI	DAPI	0.00312766
Stn_Others	M139	A5_6	450	ISMI	DAPI	0.00312766
Stn_Others	M139	A5_6	450	ISMI	DAPI	0.00312766
Stn_Others	M139	A5_6	450	ISMI	DAPI	0.00279861
Stn_Others	M139	A5_6	450	ISMI	DAPI	0.00279861
Stn_Others	M139	A5_6	450	ISMI	DAPI	0.00279861
Stn_Others	M139	A5_6	450	ISMI	DAPI	0.00248199
Stn_Others	M139	A5_6	450	ISMI	DAPI	0.00248199
Stn_Others	M139	A5_6	450	ISMI	DAPI	0.00248199
Stn_Others	M139	A5_6	450	ISMI	DAPI	0.0021783
Stn_Others	M139	A5_6	450	ISMI	EUB	0.0327446
Stn_Others	M139	A5_6	450	ISMI	EUB	0.0217462
Stn_Others	M139	A5_6	450	ISMI	EUB	0.0312895
Stn_Others	M139	A5_6	450	ISMI	EUB	0.110788
Stn_Others	M139	A5_6	450	ISMI	EUB	0.0198559
[truncated: 82,453 more rows]
